# Supplementary material for: The formation of benzoxacin-3-ones via intramolecular Nicholas reactions and synthesis of 8-membered heliannuols
Source: Royal Society of Chemistry journal article supplement (doi:10.1039/d1ob01395e), 2021-01-01

## Supplementary Information

### **The Formation of Benzoxacin-3-ones via Intramolecular Nicholas Reactions and Synthesis of 8- Membered Heliannuols**

Brent. St. Onge and James R. Green\*

Department of Chemistry and Biochemistry, University of Windsor, Windsor, ON, N9B 3P4, Canada

#### Table of Contents

|                                                                         |           |
|-------------------------------------------------------------------------|-----------|
| <b>1. General Considerations</b>                                        | <b>2</b>  |
| <b>2. Experimental Procedures for New Compounds</b>                     | <b>2</b>  |
| <b>3. References</b>                                                    | <b>32</b> |
| <b>4. <sup>1</sup>H and <sup>13</sup>C NMR Spectra of New Compounds</b> | <b>33</b> |

**General Considerations.** Reagents were obtained from commercial sources otherwise stated. Reactions were conducted under inert atmosphere (N<sub>2</sub>) using glassware dried in an oven (110 °C, > 1h). The solvent for each reaction was acquired from a solvent purification system (Innovative Technologies). BF<sub>3</sub>-OEt<sub>2</sub> was distilled prior to use and stored under an inert atmosphere (N<sub>2</sub>). Flash chromatography was performed according to the method of Still. High- Resolution Mass Spectrometry (HRMS) results were obtained via a Direct Insertion Probe-Electron Ionization method (70 eV), on a GCT Time of Flight (Tof) Mass Spectrometer at the McMaster Regional Centre for Mass Spectrometry, on a GCT Time of Flight (Tof) Mass Spectrometer at Queen's University, and in the University of Windsor Mass Spectrometry lab with a Tof mass spectrometer using the Atmospheric Solids Analysis Probe (ASAP) and a corona discharge to facilitate ionization. <sup>1</sup>H NMR spectra were obtained on 300 or 500 MHz spectrometers. Chemical shifts (*d*) are reported in parts per million (ppm), relative to the 7.27 ppm resonance for the residual CHCl<sub>3</sub> in CDCl<sub>3</sub>, unless otherwise indicated. Coupling constants are reported in Hertz (Hz). <sup>13</sup>C NMR data were obtained at either 75 or 125 MHz. Infrared spectra (IR) were recorded neat on a FT-IR spectrophotometer using an ATR attachment. Phenolic ether carboxylic acids **8a-g**,<sup>1</sup> and **8i**,<sup>2</sup> were made by literature methods.

**2-(2-Isopropylphenoxy)-2-methylpropanoic acid (8h)**

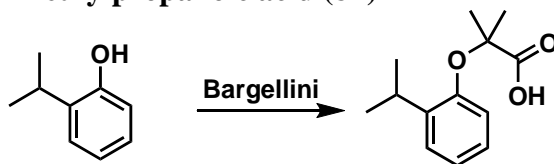

**General Procedure 1 (GP1):** Sodium hydroxide (1.4623 g, 36.6 mmol, 5 equiv) was added with acetone (7 mL). To the resulting suspension, a solution of 2-isopropyl phenol (0.9950 g, 7.31 mmol) in acetone (7 mL) was added. The mixture was heated to reflux for 30 min, and chloroform (0.79 mL, 8.8 mmol, 1.2 equiv) in acetone (7 mL) was added. The resulting solution was further

stirred at reflux for 3.5 hours and was subsequently concentrated under vacuum. The residue was dissolved using water and extracted with dichloromethane. The aqueous phase was acidified using 1M HCl. The resulting white suspension was extracted with dichloromethane. The combined CH<sub>2</sub>Cl<sub>2</sub> phases were dried (MgSO<sub>4</sub>) and concentrated under reduced pressure. The resulting **8h** was obtained as an off-white solid (1.1289 g, 70%) and of sufficient purity for subsequent use: **8h**, mp 85-86°C; <sup>1</sup>H NMR (300 MHz, CDCl<sub>3</sub>) δ 11.51 (br s, 1H), 7.33 – 7.30 (m, 1H) 7.17 – 7.15 (m, 1H) 7.12 – 7.02 (m, 1H) 6.87 – 6.84 (m, 1H) 3.44 (septet, J = 6.9 Hz, 1H) 1.72 (s, 6H) 1.30 (d, J = 6.9 Hz, 6H); <sup>13</sup>C (75 MHz, CDCl<sub>3</sub>) 180.6, 152.0, 139.7, 126.5, 126.0, 122.3, 116.9, 78.6, 26.9, 25.2, 22.8; IR ν<sub>max</sub>: 3102, 3081, 2997, 2963, 1701, 1487, 1450, 1237, 1155, 754; HRMS m/e for C<sub>13</sub>H<sub>18</sub>O<sub>3</sub> calcd (M<sup>+</sup>) 222.1255 found 222.1253.

#### 2-(4-Methoxy-3-methylphenoxy)-2-methylpropanoic acid (**8j**)

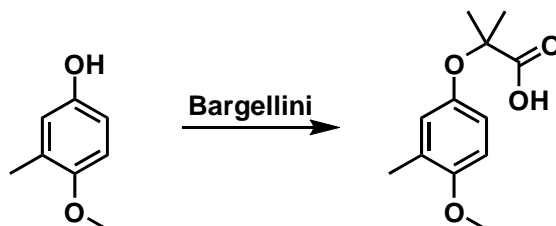

The application of **GP1** using 4-methyl-3-methoxyphenol (0.5376 g, 3.89 mmol). The resulting **8j** was obtained as a light tan oil (0.6694 g, 77%) and of sufficient purity for future use: **8j**, <sup>1</sup>H NMR (300 MHz, CDCl<sub>3</sub>) δ 9.69 (br s, 1H), 6.80 – 6.68 (m, 3H) 3.80 (s, 3H) 2.19 (s, 3H) 1.56 (s, 6H); <sup>13</sup>C (125 MHz, CDCl<sub>3</sub>) 177.5, 154.3, 146.8, 127.6, 124.6, 119.5, 110.2, 80.2, 55.6, 24.8, 16.3; IR ν<sub>max</sub>: 2983, 2940, 2835, 1708, 1497, 1465, 1256, 1142, 1033; HRMS m/e for C<sub>12</sub>H<sub>16</sub>O<sub>4</sub> calcd (M<sup>+</sup>) 224.1049 found 224.1051.

### N-Methoxy-N,2-dimethyl-2-(phenoxy)propenamide (9a)

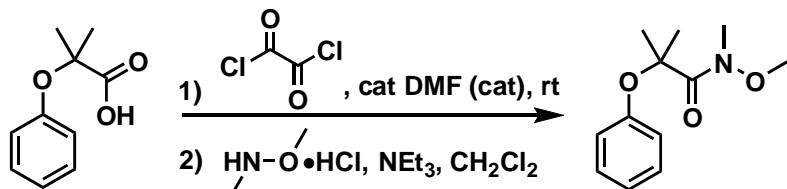

**General Procedure 2 (GP2):** To a 50mL 2-necked round bottom flask containing carboxylic acid **8a** (0.5250 g, 2.97 mmol) was added dry dichloromethane (25 mL) and a drying tube. To the resulting solution, a few drops of dimethylformamide (DMF) and oxalyl chloride (0.764 mL, 8.91 mmol, 3 equiv) was added dropwise (**HCl formation!**). The resulting solution was stirred at room temperature for 3.5 h and concentrated under reduced pressure to yield the crude acid chloride. The flask was fitted with a drying tube and dichloromethane (25 mL) was added. N,O-dimethylhydroxylamine hydrochloride was added (0.3475 g, 3.56 mmol, 1.2 equiv), followed by triethylamine (1.03 mL, 7.42 mmol, 2.5 equiv) at 0°C dropwise. Once the addition of triethylamine is complete, the resulted solution was allowed to stir overnight at room temperature. Saturated sodium bicarbonate was added and the mixture extracted with dichloromethane. The organic phase was then washed with 1M HCl (3x) and brine. The organic phase was dried using magnesium sulfate ( $\text{MgSO}_4$ ) and concentrated under reduced pressure. The product **9a** was sufficient purity for future use as a tan oil (0.6492 g, 98%);  $^1\text{H}$  NMR (300 MHz,  $\text{CDCl}_3$ )  $\delta$  7.23 (m, 2H) 6.97 – 6.92 (m, 1H) 6.86 (m, 2H) 3.58 (s, 3H) 3.28 (s, 3H) 1.61 (s, 6H);  $^{13}\text{C}$  (75 MHz,  $\text{CDCl}_3$ ) 172.8, 155.5, 129.2, 121.5, 118.1, 79.7, 60.4, 34.5, 25.0; IR  $\nu_{\text{max}}$  : 2991, 2979, 1650, 1595, 1490, 1228, 1148, 753, 694; HRMS m/e for  $\text{C}_{12}\text{H}_{17}\text{NO}_3$  calcd ( $\text{M}^++\text{H}$ ) 224.1286 found 224.1282.

### N-Methoxy-N,2-dimethyl-2-(p-tolyloxy)propenamide (9b)

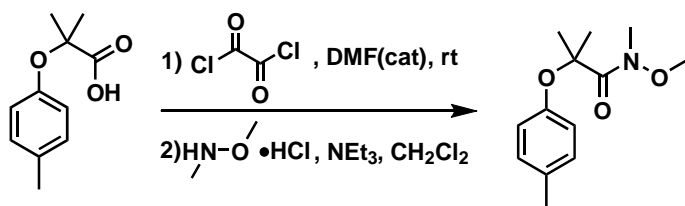

**GP2** was applied to carboxylic acid **8b** (0.5167 g, 2.66 mmol) employing oxalyl chloride (0.680 mL, 7.98 mmol, 3 equiv), N,O-dimethylhydroxylamine hydrochloride (0.3114 g, 3.19 mmol, 1.2 equiv ) and triethylamine (0.930 mL, 6.65 mmol, 2.5 equiv). Once the addition of triethylamine was complete, the resulting solution was allowed to stir overnight at room temperature. The reaction was quenched with saturated sodium bicarbonate and extracted with dichloromethane. The organic phase was then washed with 1M HCl (3x) and brine. The organic phase was dried using magnesium sulfate (MgSO<sub>4</sub>) and concentrated under reduced pressure. The product **9b** was isolated as a yellow oil (0.5921 g, 94%); <sup>1</sup>H NMR (300 MHz, CDCl<sub>3</sub>) δ 7.00 (d, J = 8.4 Hz, 2H) 6.74 (d, J = 8.4 Hz, 2H) 3.59 (s, 3H) 3.27 (s, 3H) 2.24 (s, 3H) 1.57 (s, 6H); <sup>13</sup>C (75 MHz, CDCl<sub>3</sub>) 172.7, 153.2, 130.9, 129.6, 118.1, 79.7, 60.4, 34.5, 24.9, 20.3; IR  $\nu_{\text{max}}$ : 2974, 2924, 1652, 1611, 1583, 1506, 1227, 1150, 811; HRMS m/e for C<sub>13</sub>H<sub>19</sub>NO<sub>3</sub> calcd (M<sup>+</sup>+H) 238.1443 found 238.1440.

### 2-(4-tert-Butylphenoxy)-N-methoxy-N,2-dimethylpropanamide (**9c**)

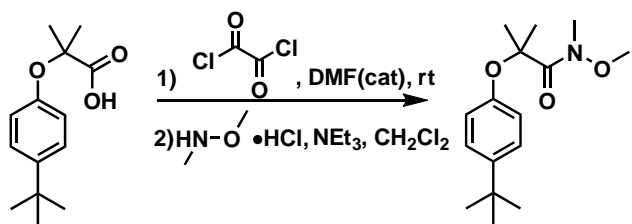

**GP2** was applied to carboxylic acid **8c** (0.6255 g, 2.64 mmol), using oxalyl chloride (0.680 mL, 7.94 mmol), N,O-dimethylhydroxylamine hydrochloride (0.3098 g, 3.17 mmol), and triethylamine (0.920 mL, 6.60 mmol). The product **9c** was isolated crude as a gold oil (0.6159 g, 83%); <sup>1</sup>H NMR (300 MHz, CDCl<sub>3</sub>) δ 7.22 (d, J = 7.5 Hz, 2H) 6.78 (d, J = 7.8 Hz, 2H), 3.60 (s, 3H) 3.29 (s, 3H)

1.58 (s, 6H) 1.26 (s, 9H);  $^{13}\text{C}$  (75 MHz,  $\text{CDCl}_3$ ) 173.5, 153.2, 144.5, 126.1, 118.0, 79.9, 60.6, 34.8, 34.1, 31.5, 25.2; IR  $\nu_{\text{max}}$ : 2961, 2903, 1652, 1607, 1509, 1461, 1290, 1176, 832; HRMS  $m/e$  for  $\text{C}_{16}\text{H}_{25}\text{NO}_3$  calcd ( $\text{M}^+\text{+H}$ ) 280.1912 found 280.1908.

### N-Methoxy-2-(4-methoxyphenoxy)-N,2-dimethylpropanamide (9d)

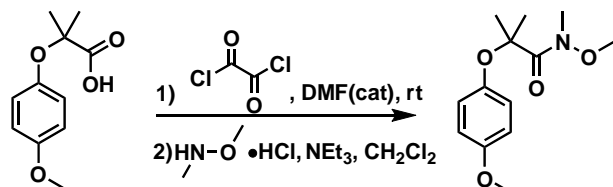

**GP2** was applied to carboxylic acid **8d** (0.7593 g, 3.61 mmol), using oxalyl chloride (0.930 mL, 10.8 mmol), N,O-dimethylhydroxylamine hydrochloride (0.4228 g, 4.33 mmol), and triethylamine (1.26 mL, 9.03 mmol). The crude product subjected to flash chromatography using 5:1 petroleum ether :  $\text{Et}_2\text{O}$ , to afford **9d** as a yellow oil (0.6555 g, 72%);  $^1\text{H}$  NMR (300 MHz,  $\text{CDCl}_3$ )  $\delta$  6.83 – 6.74 (m, 4H) 3.74 (s, 3H) 3.64 (s, 3H), 3.30 (br s, 3H), 1.55 (s, 6H);  $^{13}\text{C}$  (125 MHz,  $\text{CDCl}_3$ ) 173.5, 154.6, 149.1, 120.0, 114.3, 80.2, 60.5, 55.4, 34.6, 25.0; IR  $\nu_{\text{max}}$ : 2993, 2936, 2835, 1650, 1504, 1441, 1216, 1149; HRMS  $m/e$  for  $\text{C}_{13}\text{H}_{19}\text{NO}_4$  calcd ( $\text{M}^+\text{+H}$ ) 254.1392 found 254.1394.

### 2-(4-Chlorophenoxy)-N-methoxy-N,2-dimethylpropanamide (9e)

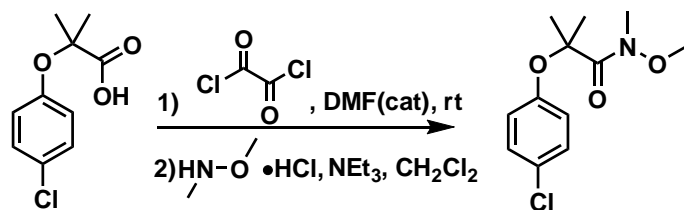

**GP2** was applied to carboxylic acid derivative **8e** (0.8148 g, 3.79 mmol), using oxalyl chloride (0.980 mL, 11.3 mmol), N,O-dimethylhydroxylamine hydrochloride (0.4443 g, 4.55 mmol), and triethylamine (1.32 mL, 9.49 mmol). The crude product subjected to flash chromatography 10:1 petroleum ether :  $\text{Et}_2\text{O}$ , which gave **9e** as a yellow oil (0.6074 g, 62%); this material was spectroscopically identical to a literature report.<sup>3</sup>

### N-Methoxy-N,2-dimethyl-2-(m-tolyloxy)propenamide (9f)

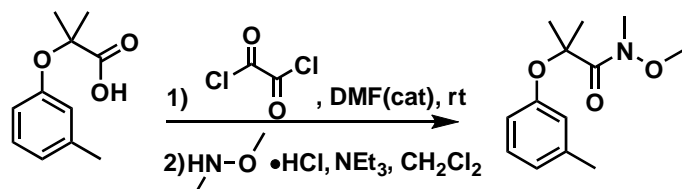

**GP2** was applied to carboxylic acid derivative carboxylic acid **8f** (0.6328 g, 3.26 mmol), using oxalyl chloride (0.840 mL, 9.77 mmol), N,O-dimethylhydroxylamine hydrochloride (0.3814 g, 3.91 mmol), and triethylamine (1.14 mL, 8.14 mmol). The crude product was subjected to flash chromatography (10:1 petroleum ether :  $\text{Et}_2\text{O}$ ) to afford **9f** a pale yellow oil (0.4559 g, 59%);  $^1\text{H}$  NMR (500 MHz,  $\text{CDCl}_3$ )  $\delta$  7.11 (m, 1H), 6.78 (m, 1H), 6.70 – 6.64 (m, 2H), 3.61 (s, 3H), 3.30 (s, 3H), 2.29 (s, 3H), 1.61 (s, 6H);  $^{13}\text{C}$  (125 MHz,  $\text{CDCl}_3$ ) 173.4, 155.5, 139.3, 129.0, 122.5, 119.0, 114.9, 79.7, 60.5, 34.7, 25.1, 21.4; IR  $\nu_{\text{max}}$  : 2980, 2923, 2866, 1652, 1601, 1487, 1258, 1171; HRMS  $m/e$  for  $\text{C}_{13}\text{H}_{19}\text{NO}_3$  calcd ( $\text{M}^+\text{+H}$ ) 238.1443 found 238.1444.

### N-Methoxy-N,2-dimethyl-2-(o-tolyloxy)propenamide (9g)

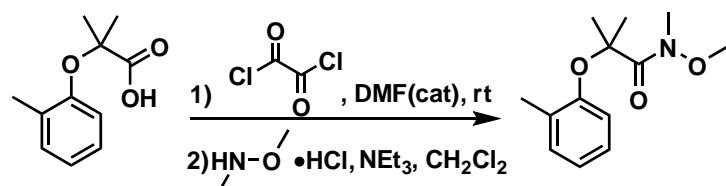

**GP2** was applied to carboxylic acid derivative carboxylic acid **8g** (0.7603 g, 3.91 mmol), using oxalyl chloride (1.00 mL, 11.7 mmol), N,O-dimethylhydroxylamine hydrochloride (0.4582 g, 4.70 mmol), and triethylamine (1.36 mL, 9.79 mmol). The crude product was subjected to flash chromatography (10:1 petroleum ether :  $\text{Et}_2\text{O}$ ) to give **9g** as a white crystalline solid (0.6805 g, 73 %), mp 63-65°C;  $^1\text{H}$  NMR (300 MHz,  $\text{CDCl}_3$ )  $\delta$  7.13 (d,  $J = 7.4$  Hz, 1H) 7.04 (apparent t,  $J = 7.8$  Hz, 1H) 6.85 (apparent t,  $J = 7.4$  Hz, 1H) 6.75 (d,  $J = 8.1$  Hz, 1H) 3.56 (s, 3H) 3.28 (s, 3H) 2.22 (s, 3H) 1.63 (s, 6H);  $^{13}\text{C}$  (75 MHz,  $\text{CDCl}_3$ ) 173.0, 153.7, 130.8, 128.3, 126.3, 121.1, 115.4,

79.5, 60.2, 34.5, 25.1, 16.5; IR  $\nu_{\text{max}}$  : 3005, 2992, 2818, 1644, 1599, 1488, 1454, 1201, 1154; HRMS m/e for  $\text{C}_{13}\text{H}_{19}\text{NO}_3$  calcd ( $\text{M}^+\text{H}$ ) 238.1443 found 238.1442.

### 2-(2-Isopropylphenoxy)-N-methoxy-N,2-dimethylpropanamide (9h)

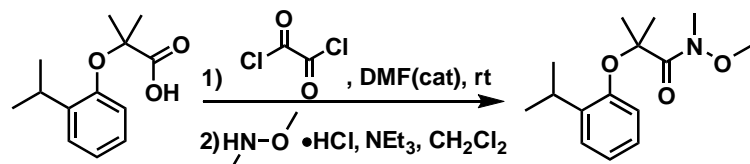

**GP2** was applied to carboxylic acid derivative carboxylic acid **8h** (0.5500 g, 2.47 mmol), with oxalyl chloride (0.640 mL, 7.42 mmol), N,O-dimethylhydroxylamine hydrochloride (0.2896 g, 2.97 mmol), and triethylamine (0.860 mL, 6.18 mmol). The crude product was purified using flash chromatography (15:1 hexanes : ethyl acetate) to afford **9h** as a white solid (0.5043 g, 77%), mp 52-53°C;  $^1\text{H}$  NMR (300 MHz,  $\text{CDCl}_3$ )  $\delta$  7.19 (d,  $J = 7.4$  Hz, 1H) 7.02 (dd,  $J = 8.1, 7.4$  Hz, 1H) 6.92 (dd,  $J = 8.1, 7.4$  Hz, 1H) 6.72 (d,  $J = 8.1$  Hz, 1H) 3.57 (s, 3H) 3.32 (septet,  $J = 6.9$  Hz, 1H) 3.30 (s, 3H) 1.63 (s, 6H) 1.23 (d,  $J = 6.9$  Hz, 6H);  $^{13}\text{C}$  (75 MHz,  $\text{CDCl}_3$ ) 173.4, 152.7, 138.6, 126.5, 126.1, 121.4, 115.7, 79.5, 60.4, 34.5, 27.2, 25.1, 22.7; IR  $\nu_{\text{max}}$  : 2965, 2949, 1650, 1597, 1583, 1487, 1442, 1236, 1152, 746; HRMS m/e for  $\text{C}_{15}\text{H}_{23}\text{NO}_3$  calcd ( $\text{M}^+\text{H}$ ) 266.1756 found 266.1756.

### 2-(4-Chloro-3-methylphenoxy)-N-methoxy-N,2-dimethylpropanamide (9i)

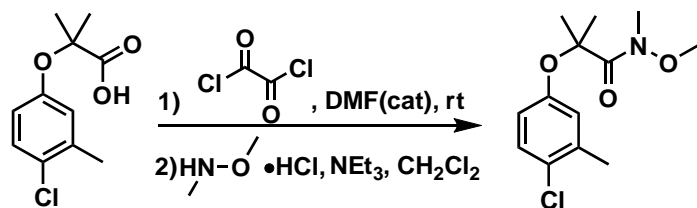

**GP2** was applied to carboxylic acid derivative carboxylic acid **8i** (1.1940 g, 5.22 mmol), using oxalyl chloride (1.34 mL, 15.7 mmol), N,O-dimethylhydroxylamine hydrochloride (0.6112 g, 6.27 mmol), and triethylamine (1.82 mL, 13.1 mmol). The crude product was subjected to flash chromatography (10:1 petroleum ether :  $\text{Et}_2\text{O}$ ) to afford **9i** a yellow oil (1.3071 g, 92%);  $^1\text{H}$  NMR



(300 MHz, CDCl<sub>3</sub>)  $\delta$  7.17 (d, J = 8.7 Hz, 1H) 6.76 (d, J = 2.9 Hz, 1H) 6.64 (dd, J = 8.7, 2.9 Hz, 1H) 3.60 (s, 3H) 3.29 (s, 3H) 2.30 (s, 3H) 1.60 (s, 6H); <sup>13</sup>C (75 MHz, CDCl<sub>3</sub>) 173.0, 154.1, 137.1, 129.5, 127.0, 120.9, 116.7, 80.2, 60.6, 34.6, 25.1, 20.2; IR  $\nu_{\text{max}}$  : 2980, 2937, 2866, 1652, 1477, 1240, 1177; HRMS m/e for C<sub>13</sub>H<sub>18</sub>ClNO<sub>3</sub> calcd (M<sup>+</sup>+H) 272.1053 found 272.1053.

### N-Methoxy-2-(4-methoxy-3-methylphenoxy)-N,2-dimethylpropanamide (9j)

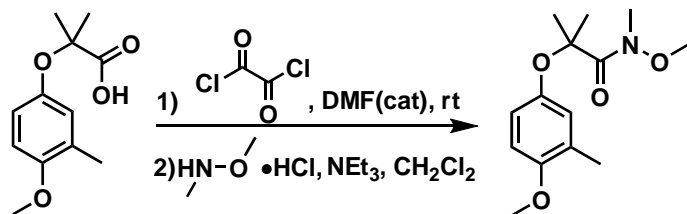

**GP2** was applied to carboxylic acid derivative carboxylic acid **8j** (1.3011 g, 5.80 mmol), using oxalyl chloride (1.50 mL, 17.4 mmol), N,O-dimethylhydroxylamine hydrochloride (0.6791 g, 6.96 mmol), and triethylamine (2.00 mL, 14.5 mmol). The crude product was subjected to flash chromatography (5:1 petroleum ether : Et<sub>2</sub>O) to afford **9j** as a pale yellow oil (1.4423 g, 93%); <sup>1</sup>H NMR (300 MHz, CDCl<sub>3</sub>)  $\delta$  6.70 – 6.66 (m, 3H) 3.75 (s, 3H) 3.65 (s, 3H) 3.32 (s, 3H) 2.15 (s, 3H) 1.55 (s, 6H); <sup>13</sup>C (75 MHz, CDCl<sub>3</sub>) 173.1, 152.9, 148.6, 127.5, 122.0, 116.3, 110.3, 80.0, 60.5, 55.5, 34.7, 25.0, 16.2; IR  $\nu_{\text{max}}$  : 2973, 2866, 1651, 1498, 1218, 1149; HRMS m/e for C<sub>14</sub>H<sub>21</sub>NO<sub>4</sub> calcd (M<sup>+</sup>+H) 268.1549 found 268.1554.

### 6-Methoxy-2-methyl-2-phenoxyhex-4-yn-3-one (10a)

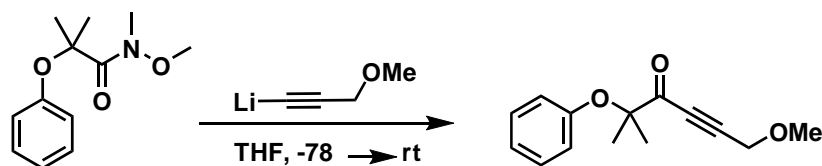

**General Procedure 3 (GP3):** To a solution of methyl propargyl ether (0.27 mL, 3.2 mmol) dry tetrahydrofuran (15 mL) at -78 °C was added n-butyllithium (0.79 mL, 1.6 mmol). The solution was stirred at -78°C for 1 h. The Weinreb amide **9a** (0.1507 g, 0.67 mmol) was dissolved in dry

tetrahydrofuran and injected dropwise. The resulting solution was allowed to warm to room temperature with stirring overnight. Saturated NH<sub>4</sub>Cl(aq) was added and the mixture was extracted with diethyl ether. The organic phase was dried (MgSO<sub>4</sub>), filtered, and concentrated under reduced pressure. The crude material was filtered through a silica plug, giving **10a** as a yellow oil (0.1489g, 95%); <sup>1</sup>H NMR (300 MHz, CDCl<sub>3</sub>) δ 7.28 (t, J = 7.8 Hz, 2H), 7.03 (apparent t, J = 7.3 Hz, 1H), 6.91 (d, J = 7.9 Hz, 2H), 4.27 (s, 2H), 3.34 (s, 3H), 1.58 (s, 6H); <sup>13</sup>C (75 MHz, CDCl<sub>3</sub>) 189.9, 155.1, 129.2, 122.5, 119.7, 91.7, 83.74, 83.66, 59.5, 57.8, 23.7; IR ν<sub>max</sub> :3064, 3039, 2989, 2935, 2897, 2206, 1677, 1589, 1490, 1462, 1227, 1125, 1100, 752, 693; HRMS m/e for C<sub>14</sub>H<sub>16</sub>O<sub>3</sub>Na calcd (M<sup>+</sup> + Na) 255.0997, found 255.0991.

#### 6-Methoxy-2-methyl-2-phenoxyhex-4-yn-3-one (10aa)

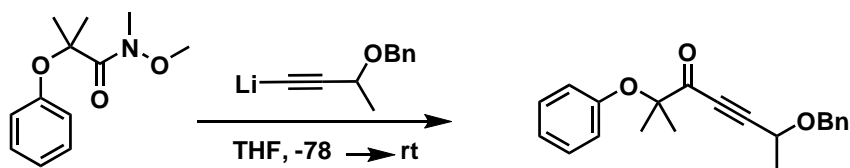

**GP3** was applied to Weinreb amide **9a** (0.2081 g, 0.93 mmol) using the lithium acetylide generated from the 3-benzyloxybutyne and n-butyllithium. The crude product was subjected to column chromatography (25:1 hexane : Et<sub>2</sub>O), to give **10aa** (0.2253 g, 75%) as a yellow oil; <sup>1</sup>H NMR (300 MHz, CDCl<sub>3</sub>) δ 7.36 – 7.29 (m, 7H) 7.05 (t, J = 7.4, 1H), 6.94 (m, 2H) 4.69 (d, J = 11.6 Hz, 1H) 4.40 (d, J = 11.6 Hz, 1H) 4.34 (q, J = 6.9 Hz, 1H) 1.64 (s, 3H) 1.63 (s, 3H) 1.49 (d, J = 6.9 Hz, 3H); <sup>13</sup>C (75 MHz, CDCl<sub>3</sub>) 190.3, 155.2, 137.1, 129.2, 128.3, 128.0, 127.8, 122.2, 119.1, 95.4, 83.7, 82.3, 70.7, 63.9, 24.2, 23.4, 21.0; IR ν<sub>max</sub> : 3064, 3031, 2988, 2868, 2209, 1679, 1589, 1489, 1455, 1106, 1027, 750, 694; HRMS m/e for C<sub>21</sub>H<sub>22</sub>O<sub>3</sub> calcd 323.1647 (M<sup>+</sup>+H), found 323.1641.

#### 6-Methoxy-2-methyl-2-(p-tolyloxy)hex-4-yn-3-one (10b)

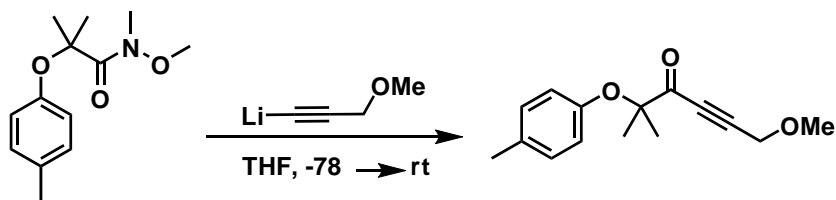

**GP3** was applied to Weinreb amide **9b** (0.3909 g, 1.65 mmol) using methyl propargyl ether (0.70 mL, 8.25 mmol) and n-butyllithium (2.05 mL, 2.00 M, 4.12 mmol). Compound **10b** was isolated as a gold oil (0.3652 g, 90%) with sufficient purity for future use;  $^1\text{H}$  NMR (300 MHz,  $\text{CDCl}_3$ )  $\delta$  7.04 (d,  $J = 8.5$  Hz, 2H), 6.78 (d,  $J = 8.5$  Hz, 2H), 4.27 (s, 2H), 3.35 (s, 3H), 2.29 (s, 3H), 1.52 (s, 6H);  $^{13}\text{C}$  (75 MHz,  $\text{CDCl}_3$ ) 190.1, 152.7, 132.1, 129.7, 119.9, 91.5, 83.74, 83.71, 59.6, 57.8, 23.7, 20.5; IR  $\nu_{\text{max}}$ : 2988, 2932, 2208, 1677, 1610, 1506, 1224, 1156, 1125, 1099, 809; HRMS  $m/e$  for  $\text{C}_{15}\text{H}_{18}\text{O}_3$  calcd ( $\text{M}^+\text{H}$ ) 247.1334 found 247.1336.

#### 2-(4-tert-Butylphenoxy)-6-methoxy-2-methylhex-4-yn-3-one (10c)

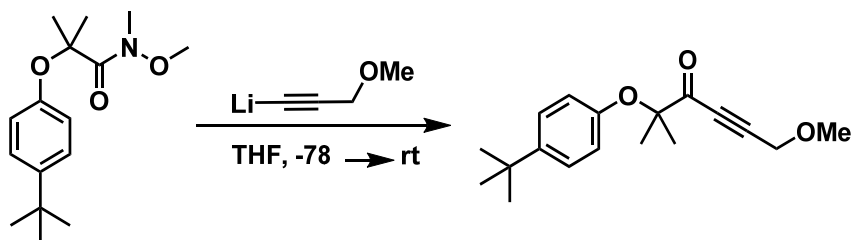

**GP3** was applied to Weinreb amide **9c** (0.2212 g, 0.79 mmol) The crude product was subjected flash chromatography using (10:1 petroleum ether :  $\text{Et}_2\text{O}$ ) to afford **10c** (0.0966 g, 42%) as a yellow oil;  $^1\text{H}$  NMR (300 MHz,  $\text{CDCl}_3$ )  $\delta$  7.24 (d,  $J = 8.7$  Hz, 2H), 6.80 (d,  $J = 8.7$  Hz, 2H), 4.25 (s, 2H), 3.30 (s, 3H), 1.54 (s, 6H), 1.28 (s, 9H);  $^{13}\text{C}$  (75 MHz,  $\text{CDCl}_3$ ) 190.1, 152.6, 145.2, 125.9, 119.2, 91.5, 83.7, 83.6, 59.5, 57.7, 34.1, 31.4, 23.7; IR  $\nu_{\text{max}}$ : 2963, 2904, 2869, 2208, 1678, 1607, 1509, 1462, 1160, 1128, 1102, 860; HRMS  $m/e$  for  $\text{C}_{18}\text{H}_{24}\text{O}_3$  calcd ( $\text{M}^+\text{H}$ ) 289.1804, found 289.1794.

#### 2-(4-tert-Butylphenoxy)-6-methoxy-2-methylhept-4-yn-3-one (10cc)

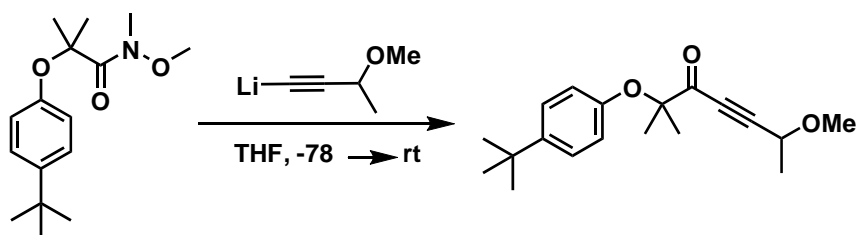

**GP3** was applied to Weinreb amide **9c** (0.2302 g, 0.82 mmol) using the lithium acetylide generated from the 3-methoxybutyne and n-butyllithium. Following filtration through a short silica plug using dichloromethane, **10cc** was isolated as a yellow oil (0.2472 g, 99%);  $^1\text{H}$  NMR (300 MHz,  $\text{CDCl}_3$ )  $\delta$  7.24 (d,  $J = 8.8$  Hz, 2H), 6.79 (d,  $J = 8.8$  Hz, 2H), 4.19 (q,  $J = 6.6$  Hz, 1H), 3.28 (s, 3H), 1.54 (s, 6H), 1.40 (d,  $J = 6.9$  Hz, 3H), 1.28 (s, 9H);  $^{13}\text{C}$  (75 MHz,  $\text{CDCl}_3$ ) 190.4, 152.8, 145.1, 125.9, 118.9, 95.2, 83.6, 82.3, 66.7, 56.5, 34.0, 31.4, 24.1, 23.6, 20.9; IR  $\nu_{\text{max}}$ : 3096, 3041, 2964, 2823, 2207, 1679, 1607, 1509, 1461, 1235, 1139; HRMS  $m/e$  for  $\text{C}_{19}\text{H}_{26}\text{O}_3$  calcd ( $\text{M}^+\text{+H}$ ) 303.1960 found 303.1948.

#### 6-(Benzyloxy)-2-(4-methoxyphenoxy)-2-methylhept-4-yn-3-one (**10d**)

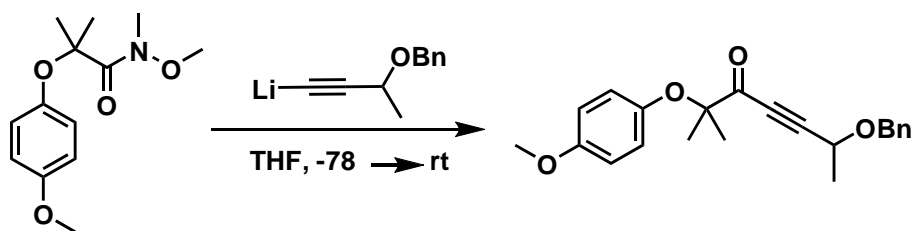

**GP3** was applied to Weinreb amide **9d** (0.2187 g, 0.86 mmol) using the lithium acetylide generated from the 3-benzyloxybutyne and n-butyllithium. The crude product was subjected to column chromatography using 7.5:1 petroleum ether :  $\text{Et}_2\text{O}$  to afford **10d** as a yellow oil (0.2788 g, 92%);  $^1\text{H}$  NMR (300 MHz,  $\text{CDCl}_3$ )  $\delta$  7.39 – 7.29 (m, 5H), 6.91 (d,  $J = 9.2$  Hz, 2H), 6.81 (d,  $J = 9.2$  Hz, 2H), 4.75 (d,  $J = 11.6$  Hz, 1H), 4.47 (d,  $J = 11.6$  Hz, 1H), 4.40 (q,  $J = 6.7$  Hz, 1H), 3.78 (s, 3H), 1.56 – 1.53 (m, 9H);  $^{13}\text{C}$  (75 MHz,  $\text{CDCl}_3$ ) 190.2, 155.3, 148.6, 137.1, 128.3, 128.0, 127.8, 121.5, 114.2, 95.3, 84.0, 82.4, 70.8, 64.1, 55.4, 23.9, 23.4, 21.1; IR  $\nu_{\text{max}}$ : 3064, 3032, 2961, 2868, 2208,

1679, 1596, 1450, 1257, 1147, 1100, 743, 698; HRMS m/e for C<sub>22</sub>H<sub>24</sub>O<sub>4</sub> calcd (M<sup>+</sup>) 352.1674 found 352.1681.

### 6-(Benzyloxy)-2-(4-chlorophenoxy)-2-methylhept-4-yn-3-one (10e)

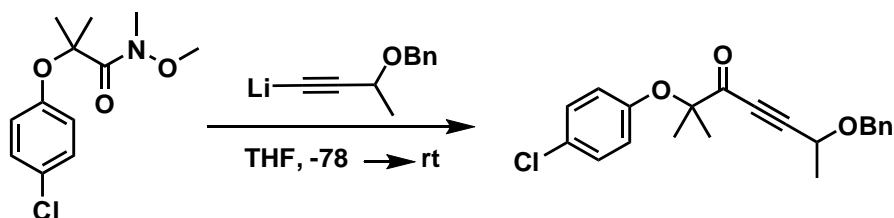

**GP3** was applied to Weinreb amide **9e** (0.2041 g, 0.82 mmol) using the lithium acetylide generated from the 3-benzyloxybutyne and n-butyllithium. The crude product was subjected to column chromatography using 7.5:1 petroleum ether : Et<sub>2</sub>O to afford **10e** as a yellow oil (0.2414 g, 85%); <sup>1</sup>H NMR (300 MHz, CDCl<sub>3</sub>) δ 7.35 – 7.16 (m, 7H), 6.80 (m, 2H), 4.64 (d, J = 11.7 Hz, 1H), 4.36 (d, J = 11.7 Hz, 1H), 4.31 (q, J = 6.8 Hz, 1H), 1.56 (s, 3H), 1.55 (s, 3H), 1.45 (d, J = 6.8 Hz, 3H); <sup>13</sup>C (75 MHz, CDCl<sub>3</sub>) 189.6, 153.8, 137.0, 129.2, 128.4, 127.9, 127.8, 127.4, 120.6, 95.7, 84.1, 82.1, 70.8, 64.0, 24.0, 23.3, 21.0; IR ν<sub>max</sub>: 3063, 3030, 2982, 2844, 2207, 1679, 1616, 1487, 1223, 1146; HRMS m/e for C<sub>21</sub>H<sub>21</sub>ClO<sub>3</sub> calcd (M<sup>+</sup>+H) 357.1257 found 357.1247.

### 6-(Benzyloxy)-2-methyl-2-(m-tolyloxy)hept-4-yn-3-one (10f)

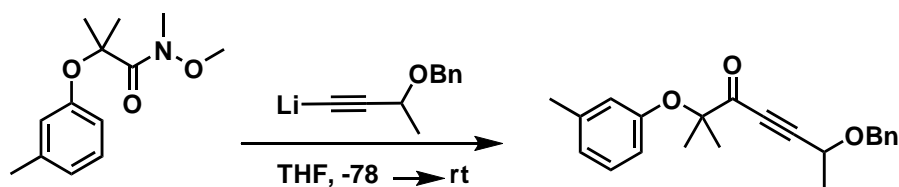

**GP3** was applied to Weinreb amide **9f** (0.2443 g, 1.02 mmol). The crude product was subjected to column chromatography (25:1 hexane : Et<sub>2</sub>O) to afford **10f** as a as a yellow oil (0.2761 g, 80%); <sup>1</sup>H NMR (300 MHz, CDCl<sub>3</sub>) δ 7.41 – 7.31 (m, 5H), 7.19 (m, 1H), 6.88 (m, 1H), 6.79 – 6.72 (m, 2H), 4.70 (d, J = 11.4 Hz, 1H), 4.40 (d, J = 11.4 Hz, 1H), 4.38 (q, J = 6.6 Hz, 1H), 2.34 (s, 3H), 1.65 (s, 3H), 1.64 (s, 3H), 1.52 (d, J = 6.9 Hz, 3H); <sup>13</sup>C (75 MHz, CDCl<sub>3</sub>) 190.4, 155.2, 139.3,

137.1, 128.9, 128.3, 128.0, 127.8, 123.1, 120.0, 115.9, 95.3, 83.6, 82.3, 70.7, 63.9, 24.2, 23.3, 21.3, 21.0; IR  $\nu_{\max}$  : 3023, 2982, 2937, 2844, 2209, 1679, 1583, 1455, 1146, 1098; HRMS m/e for  $C_{22}H_{24}O_3$  calcd 337.1803 ( $M^+ + H$ ) found 337.1800.

### 6-(Benzyloxy)-2-methyl-2-(o-tolyloxy)hept-4-yn-3-one (10g)

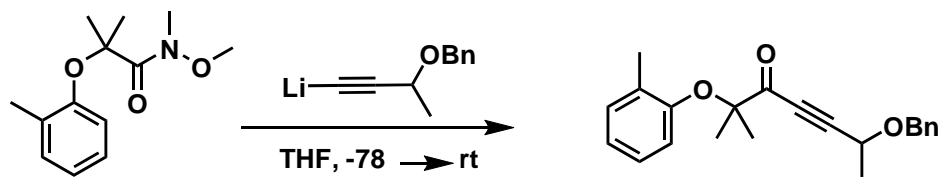

**GP3** was applied to Weinreb amide **9g** (0.2407 g, 1.01 mmol) using the lithium acetylide generated from the 3-benzyloxybutyne and n-butyllithium. The crude product was subjected to column chromatography (25:1 hexane : Et<sub>2</sub>O) to afford **10g** (0.3156 g, 92%) as a light orange oil; <sup>1</sup>H NMR (500 MHz, CDCl<sub>3</sub>)  $\delta$  7.33 – 7.17 (m, 7H), 6.91 (apparent t, J = 7.4, 1H), 6.71 (apparent d, J = 8.1, 1H), 4.64 (d, J = 11.6 Hz, 1H), 4.35 (d, J = 11.6 Hz, 1H), 4.31 (q, J = 6.7 Hz, 1H), 2.29 (s, 3H), 1.63 (s, 3H), 1.62 (s, 3H), 1.47 (d, J = 6.7 Hz, 3H); <sup>13</sup>C (75 MHz, CDCl<sub>3</sub>) 190.6, 153.5, 137.1, 131.0, 129.0, 128.2, 128.0, 127.7, 126.2, 121.7, 116.4, 95.3, 83.6, 82.2, 70.6, 63.8, 24.2, 23.3, 20.9, 16.7; IR  $\nu_{\max}$  : 3064, 3030, 2987, 2865, 2208, 1679, 1601, 1491, 1454, 1238, 1147, 1100, 777, 698; HRMS m/e for  $C_{22}H_{24}O_4$  calcd 337.1804 ( $M^+ + H$ ) found 337.1800.

### 2-(2-Isopropylphenoxy)-6-methoxy-2-methylhex-4-yn-3-one (10h)

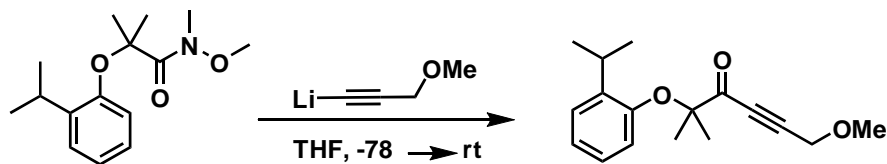

**GP3** was applied to Weinreb amide **9h** (0.3350 g, 1.26 mmol). After filtration through a short silica plug, **10h** was isolated as a orange oil (0.3454 g, 99%); <sup>1</sup>H NMR (300 MHz, CDCl<sub>3</sub>)  $\delta$  7.23 (dd, J = 7.5, 1.9 Hz, 1H), 7.04 (apparent dt, J = 8.0, 1.9 Hz, 1H), 6.96 (apparent dt, J = 7.4, 1.2 Hz, 1H), 6.63 (dd, J = 8.0, 1.2 Hz, 1H), 4.21 (s, 2H), 3.38 (sept, J = 6.9 Hz, 1H), 3.26 (s, 3H), 1.59 (s, 6H),

1.24 (d,  $J = 6.9$  Hz, 6H);  $^{13}\text{C}$  (75 MHz,  $\text{CDCl}_3$ ) 190.6, 152.3, 139.3, 126.5, 125.9, 121.9, 116.5, 91.5, 83.7, 83.4, 59.5, 57.7, 27.0, 23.7, 22.7; IR  $\nu_{\text{max}}$ : 2961, 2934, 2870, 2208, 1678, 1486, 1448 1259, 1158, 1126, 1086, 749; HRMS  $m/e$  for  $\text{C}_{17}\text{H}_{22}\text{O}_3$  calcd ( $\text{M}^+\text{+H}$ ) 275.1647 found 275.1649.

### 6-(Benzyloxy)-2-(4-chloro-3-methylphenoxy)-2-methylhept-4-yn-3-one (10i)

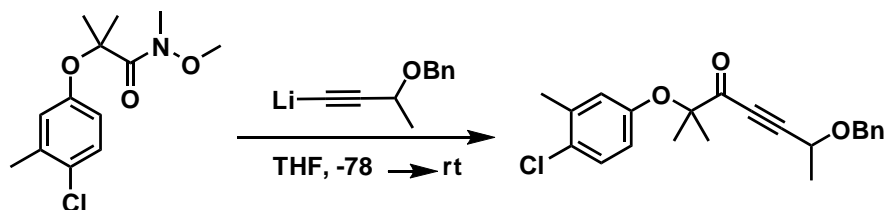

**GP3** was applied to Weinreb amide **9i** (0.1578 g, 0.58 mmol) using the lithium acetylide generated from the 3-benzyloxybutyne and n-butyllithium. The crude product was subjected to column chromatography using 30:1 petroleum ether :  $\text{Et}_2\text{O}$  to afford **10i** (0.1723 g, 80%), as a yellow oil;  $^1\text{H}$  NMR (500 MHz,  $\text{CDCl}_3$ )  $\delta$  7.37 – 7.25 (m, 6H), 6.79 (d,  $J = 1.9$  Hz, 1H), 6.65 (dd,  $J = 8.6, 1.9$  Hz, 1H), 4.66 (d,  $J = 11.7$  Hz, 1H), 4.40 – 4.30 (m, 2H), 2.30 (s, 3H), 1.58 (s, 6H), 1.48 (d, 6.6 Hz, 3H);  $^{13}\text{C}$  (125 MHz,  $\text{CDCl}_3$ ) 190.0, 153.7, 137.0, 129.4, 128.39, 128.0, 127.9, 127.7, 121.9, 117.8, 95.7, 84.0, 82.2, 70.8, 64.0, 24.1, 23.4, 21.0, 20.2; IR  $\nu_{\text{max}}$ : 3087, 3064, 3031, 2987, 2936, 2865, 2208, 1679, 1596, 1478, 1159, 1098, 806, 734, 696; HRMS  $m/e$  for  $\text{C}_{22}\text{H}_{23}\text{ClO}_3$  calcd 371.1414 ( $\text{M}^+\text{+H}$ ) 371.1411.

### 6-(Benzyloxy)-2-(4-methoxy-3-methylphenoxy)-2-methylhept-4-yn-3-one (10j)

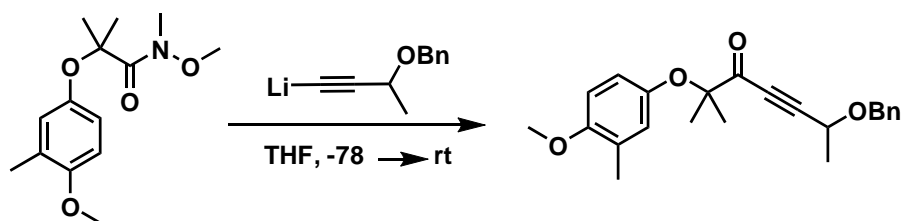

**GP3** was applied to Weinreb amide **9j** (0.1758 g, 0.65 mmol) using the lithium acetylide generated from the 3-benzyloxybutyne and n-butyllithium. The crude product was subjected to column chromatography (20:1 hexane :  $\text{Et}_2\text{O}$ ) to afford **10j** (0.2104 g, 87%) as a colorless oil;  $^1\text{H}$  NMR

(300 MHz, CDCl<sub>3</sub>)  $\delta$  7.44 – 7.35 (m, 5H), 6.86 – 6.74 (m, 3H), 4.81 (d,  $J = 11.7$  Hz, 1H), 4.53 (d,  $J = 11.7$  Hz, 1H), 4.46 (q,  $J = 6.9$  Hz, 1H), 3.86 (s, 3H), 2.26 (s, 3H), 1.60 (m, 9H); <sup>13</sup>C (75 MHz, CDCl<sub>3</sub>) 190.4, 153.5, 148.2, 137.2, 128.3, 128.1, 127.8, 127.4, 123.3, 117.9, 110.1, 95.2, 83.8, 82.5, 70.8, 64.1, 55.5, 24.0, 23.4, 21.1, 16.2; IR  $\nu_{\text{max}}$ : 3064, 3032, 2985, 2868, 2208, 1679, 1598, 1487, 1450, 1147, 1092, 747, 697; HRMS  $m/e$  for C<sub>23</sub>H<sub>26</sub>O<sub>4</sub> calcd 367.1909 (M<sup>+</sup>+H) found 367.1909.

#### Hexacarbonyl[ $\mu$ - $\eta^4$ -(6-methoxy-2-methyl-2-phenoxyhex-4-yn-3-one)]dicobalt (6a)

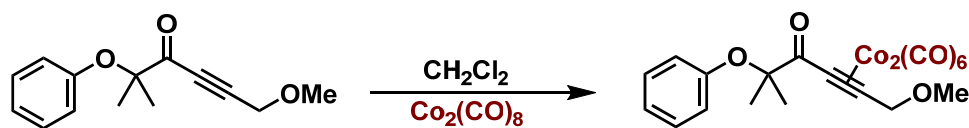

**General Procedure 4 (GP4):** To a solution of alkyne **10a** (0.1540 g, 0.66 mmol) in CH<sub>2</sub>Cl<sub>2</sub> (15 mL) was added an unweighed amount of dicobalt octacarbonyl in portions, with monitoring by TLC. After 2 h, the deep red solution was concentrated under reduced pressure and filtered through a plug of silica using hexane, to remove excess Co<sub>2</sub>(CO)<sub>8</sub>, followed by diethyl ether. The residue of the diethyl ether washings was subjected to flash chromatography (25:1 hexanes : ethyl acetate), to afford **6a** was isolated as a dark red oil (0.2920 g, 85%); <sup>1</sup>H NMR (300 MHz, CDCl<sub>3</sub>)  $\delta$  7.27 (apparent t,  $J = 7.9$  Hz, 2H), 7.06 (apparent t,  $J = 7.2$  Hz, 1H), 6.88 (dd,  $J = 7.8$  Hz, 2H), 4.40 (s, 2H), 3.46 (s, 3H), 1.60 (s, 6H); <sup>13</sup>C (75 MHz, CDCl<sub>3</sub>) 206.8, 198.3, 154.5, 129.4, 122.9, 120.7, 96.3, 85.2, 80.3, 72.8, 59.0, 25.3; IR  $\nu_{\text{max}}$ : 2987, 2876, 2098, 2057, 2012, 1740, 1588, 1492, 1455, 1220, 1158, 753, 696; HRMS  $m/e$  for C<sub>20</sub>H<sub>16</sub>Co<sub>2</sub>O<sub>9</sub> calcd (M<sup>+</sup>+H) 518.9536 found 518.9539.

#### Hexacarbonyl[ $\mu$ - $\eta^4$ -(6-methoxy-2-methyl-2-phenoxyhex-4-yn-3-one)]dicobalt (6aa)

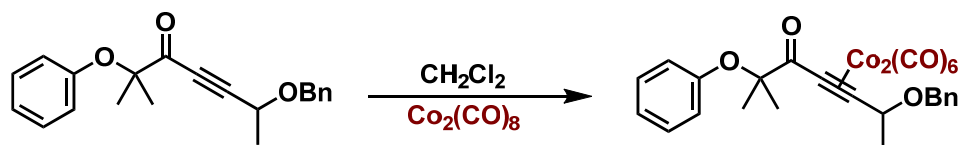



**GP4** was applied to propargyl ether ketone **10aa** (0.2089 g, 0.65 mmol). Following the silica plug filtration, the compound was found to be sufficiently pure, and product **6aa** was isolated as a dark red oil (0.3660 g, 93%);  $^1\text{H NMR}$  (500 MHz,  $\text{CDCl}_3$ ):  $\delta$  7.38 – 7.29 (m, 7H), 7.14 (apparent t,  $J = 7.4$  Hz, 1H), 6.92 (m, 2H), 4.76 (q,  $J = 6.2$  Hz, 1H), 4.75 (1/2 AB,  $J = 11.8$  Hz, 1H), 4.68 (1/2 AB,  $J = 11.8$  Hz, 3H), 1.64 (s, 3H), 1.60 (s, 3H), 1.59 (d,  $J = 6.2$  Hz, 3H);  $^{13}\text{C}$  (125 MHz,  $\text{CDCl}_3$ ) 207.1, 198.6, 153.9, 138.1, 129.3, 128.3, 127.5, 123.4, 121.8, 104.3, 85.7, 81.9, 74.6, 71.0, 25.7, 25.1, 22.6; IR  $\nu_{\text{max}}$  : 3064, 3030, 2980, 2865, 2127, 2057, 2018, 1662, 1587, 1455, 1230, 1154; HRMS  $m/e$  for  $\text{C}_{27}\text{H}_{22}\text{Co}_2\text{O}_9$  calcd ( $\text{M} - 3\text{CO}$ ) 524.0080 found 524.0097.

**Hexacarbonyl[ $\mu$ - $\eta^4$ -(6-methoxy-2-methyl-2-phenoxyhex-4-yn-3-one)]dicobalt (6b)**

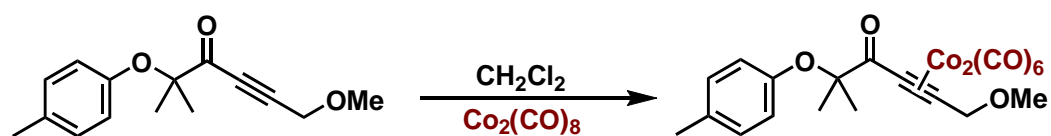

**GP4** was applied to propargyl ether ketone **10b** (0.2571 g, 1.04 mmol). Following the silica plug filtration, the compound was found to be sufficiently pure and product **6b** was isolated as a dark red oil (0.3753 g, 68%);  $^1\text{H NMR}$  (300 MHz,  $\text{CDCl}_3$ )  $\delta$  7.07 (d,  $J = 8.1$  Hz, 2H), 6.78 (d,  $J = 8.1$  Hz, 2H), 4.46 (s, 2H), 3.48 (s, 3H), 2.31 (s, 3H), 1.56 (s, 6H);  $^{13}\text{C}$  (75 MHz,  $\text{CDCl}_3$ ) 206.6, 198.5, 151.9, 132.7, 129.8, 121.2, 96.3, 85.3, 80.6, 72.9, 58.9, 25.2, 20.6; IR  $\nu_{\text{max}}$  : 3030, 2987, 2931, 2874, 2129, 2056, 2007, 1664, 1608, 1583, 1506, 1462, 1157, 1127, 1101 ; HRMS  $m/e$  for  $\text{C}_{21}\text{H}_{18}\text{Co}_2\text{O}_9$  calcd ( $\text{M}^+ + \text{H}$ ) 532.9693 found 532.9692.

**Hexacarbonyl[ $\mu$ - $\eta^4$ -(2-(4-tert-butylphenoxy)-6-methoxy-2-methylhex-4-yn-3-one)]dicobalt (6c)**

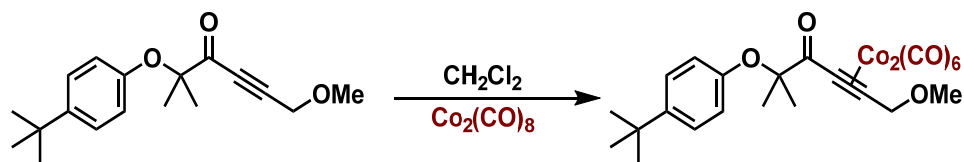

**GP4** was applied to propargyl ether ketone **10c** (0.0722 g, 0.25 mmol). Subsequent flash chromatography (25:1 hexanes : ethyl acetate) afforded **6c** as a dark red oil (0.1424 g, 99%); <sup>1</sup>H NMR (300 MHz, CDCl<sub>3</sub>) δ 7.27(m, 2H), 6.79 (m, 2H), 4.36 (s, 2H), 3.45 (s, 3H), 1.60 (s, 6H), 1.30 (s, 9H); <sup>13</sup>C (75 MHz, CDCl<sub>3</sub>) 207.0, 198.5, 152.0, 145.6, 126.1, 119.9, 96.5, 85.0, 80.6, 72.7, 58.9, 34.2, 31.4, 25.3; IR  $\nu_{\text{max}}$ : 2964, 2905, 2871, 2098, 2057, 2016, 1664, 1607, 1579, 1509, 1462, 1159, 1125, 1103, 832; HRMS m/e for C<sub>24</sub>H<sub>24</sub>Co<sub>2</sub>O<sub>9</sub> calcd (M<sup>+</sup>+H) 575.0162 found 575.0154.

**Hexacarbonyl[ $\mu$ - $\eta^4$ -(2-(4-tert-butylphenoxy)-6-methoxy-2-methylhept-4-yn-3-one)]dicobalt (6cc)**

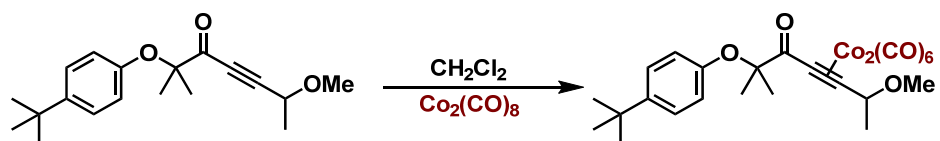

**GP4** was applied to propargyl ether ketone **10cc** (0.2040 g, 0.67 mmol). Following the silica plug filtration, the compound was found to be sufficiently pure and **6cc** was isolated as a dark red oil (0.3882 g, 98%); <sup>1</sup>H NMR (300 MHz, CDCl<sub>3</sub>) δ 7.28 (d, J = 8.7, 2H), 6.83 (d, J = 8.7, 2H), 4.45 (q, J = 6.2 Hz, 1H), 3.44 (s, 3H), 1.58 (s, 3H), 1.56 (s, 3H), 1.48 (d, J = 6.2 Hz, 3H), 1.30 (s, 9H); <sup>13</sup>C (75 MHz, CDCl<sub>3</sub>) 207.3, 198.7, 151.5, 146.2, 126.1, 121.2, 103.9, 85.6, 82.5, 57.0, 34.2, 31.4, 25.6, 25.2, 22.2; IR  $\nu_{\text{max}}$ : 3096, 3041, 2964, 2869, 2097, 2057, 2016, 1662, 1509, 1225, 1158; HRMS m/e for C<sub>25</sub>H<sub>26</sub>Co<sub>2</sub>O<sub>9</sub> calcd (M<sup>+</sup>+H-3CO) 504.0416 found 504.0393.

**Hexacarbonyl[ $\mu$ - $\eta^4$ -(2-(6-(benzyloxy)-2-(4-methoxyphenoxy)-2-methylhept-4-yn-3-one)]dicobalt (6d)**

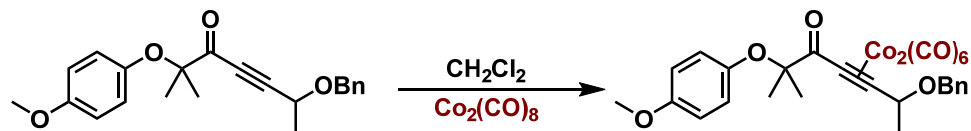

**GP4** was applied to propargyl ether ketone **6d** (0.1750 g, 0.50 mmol). Following the silica plug filtration, the compound was found to be sufficiently pure and **3d** was isolated as a dark red oil

(0.3168 g, 99%);  $^1\text{H NMR}$  (500 MHz,  $\text{CDCl}_3$ ):  $\delta$  7.33 – 7.24 (m, 5H), 6.83 – 6.78 (m, 4H), 4.78 (q,  $J = 6.4$  Hz, 1H), 4.69 (1/2 AB,  $J = 11.8$  Hz, 1H), 4.65 (1/2 AB,  $J = 11.8$  Hz, 1H), 3.79 (s, 3H), 1.55 (d,  $J = 6.4$  Hz, 3H), 1.52 (s, 3H), 1.49 (s, 3H);  $^{13}\text{C}$  (125 MHz,  $\text{CDCl}_3$ ) 206.8, 198.7, 156.0, 146.8, 138.1, 128.3, 127.5, 124.0, 114.2, 103.8, 86.2, 82.0, 74.7, 71.1, 55.5, 25.6, 25.1, 22.8; IR  $\nu_{\text{max}}$  : 3088, 3065, 3032, 2981, 2867, 2097, 2057, 2016, 1661, 1587, 1504, 1455, 1213, 1149; HRMS  $m/e$  for  $\text{C}_{28}\text{H}_{24}\text{Co}_2\text{O}_{10}$  calcd (M -3CO) 554.0186 found 554.0193.

**Hexacarbonyl[ $\mu$ - $\eta^4$ -(6-(benzyloxy)-2-(4-chlorophenoxy)-2-methylhept-4-yn-3-one)]dicobalt (6e)**

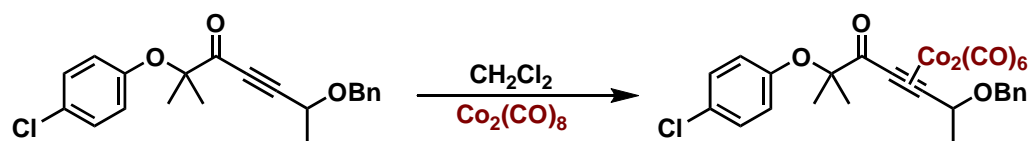

**GP4** was applied to propargyl ether ketone **10e** (0.1548 g, 0.43 mmol). Following the silica plug filtration, the compound was found to be sufficiently pure and **6e** was isolated as a dark red oil (0.2146 g, 77%);  $^1\text{H NMR}$  (500 MHz,  $\text{CDCl}_3$ ):  $\delta$  7.37 – 7.31 (m, 5H), 7.25 (m, 2H), 6.83 (m, 2H), 4.75 (1/2 AB,  $J = 11.8$  Hz, 1H), 4.73 (q,  $J = 6.1$  Hz, 1H), 4.67 (1/2 AB,  $J = 11.8$  Hz, 1H), 1.61 (s, 3H), 1.579 (d,  $J = 6.1$  Hz, 3H), 1.576 (s, 9H);  $^{13}\text{C}$  (125 MHz,  $\text{CDCl}_3$ ) 206.6, 198.5, 152.4, 138.0, 129.3, 128.8, 128.3, 127.6, 127.5, 123.1, 104.3, 86.1, 81.5, 74.4, 71.0, 25.5, 24.9, 22.5; IR  $\nu_{\text{max}}$ : 3065, 3031, 2980, 2867, 2097, 2057, 2016, 1661, 1487, 1455, 1234, 1153; HRMS  $m/e$  for  $\text{C}_{27}\text{H}_{21}\text{ClCo}_2\text{O}_9$  calcd (M -3CO) 557.9690 found 557.9703.

**Hexacarbonyl[ $\mu$ - $\eta^4$ -(6-(benzyloxy)-2-methyl-2-(m-tolyloxy)hept-4-yn-3-one)]dicobalt (6f)**

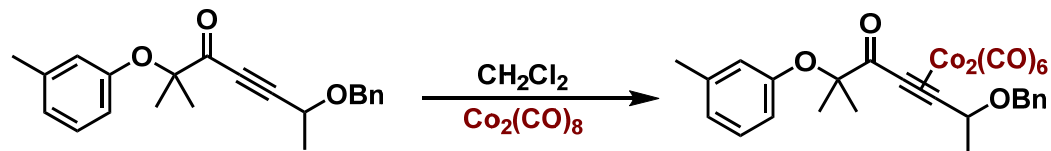

**GP4** was applied to propargyl ether ketone **6f** (0.1642 g, 0.49 mmol). Following the silica plug filtration, the compound was found to be sufficiently pure and **3f** was isolated as a dark red oil

(0.2741 g, 90%);  $^1\text{H}$  NMR (500 MHz,  $\text{CDCl}_3$ ): 7.35-7.25 (m, 5H), 7.14 (dd,  $J = 8.6, 7.7$  Hz, 1H), 6.90 (d,  $J = 7.5$  Hz, 1H), 6.64-6.69 (m, 2H), 4.71 (q,  $J = 6.2$  Hz, 1H), 4.69 (1/2 AB,  $J = 11.8$  Hz, 1H), 4.64 (1/2 AB,  $J = 11.8$  Hz, 1H), 2.30 (s, 3H), 1.58 (s, 3H), 1.55 (s, 3H), 1.54 (d,  $J = 6.2$ , 3H);  $^{13}\text{C}$  (125 MHz,  $\text{CDCl}_3$ ) 207.3, 198.6, 154.0, 139.3, 138.1, 129.0, 128.3, 127.5, 124.2, 122.3, 118.7, 104.3, 85.5, 82.0, 74.7, 71.0, 25.7, 25.1, 22.6, 21.4; IR  $\nu_{\text{max}}$ : 3086, 3064, 2981, 2866, 2097, 2058, 2024, 1662, 1584, 1497, 1456, 1254, 1140; HRMS  $m/e$  for  $\text{C}_{28}\text{H}_{24}\text{Co}_2\text{O}_9$  calcd (M-3CO) 538.0237 found 538.0251.

**Hexacarbonyl[ $\mu$ - $\eta^4$ -(6-(benzyloxy)-2-methyl-2-(*o*-tolylloxy)hept-4-yn-3-one)]dicobalt (6g)**

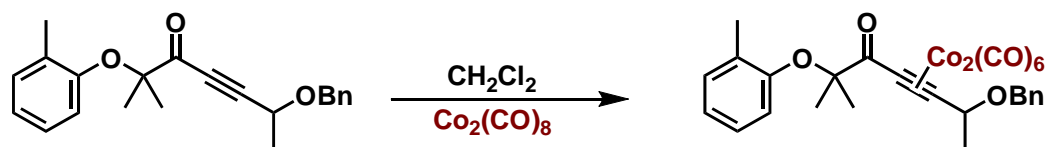

**GP4** was applied to propargyl ether ketone **6g** (0.2005 g, 0.60 mmol). Following the silica plug filtration, the compound was found to be sufficiently pure and **3g** was isolated as a dark red oil (0.3639 g, 98%);  $^1\text{H}$  NMR (500 MHz,  $\text{CDCl}_3$ ):  $\delta$  7.35 – 7.29 (m, 5H), 7.16 (d,  $J = 7.5$  Hz, 1H), 6.99 (apparent t,  $J = 7.5$  Hz, 1H), 6.91 (apparent t,  $J = 7.5$  Hz, 1H), 6.65 (d,  $J = 8.0$  Hz, 1H), 4.69 (1/2 AB,  $J = 11.8$  Hz, 1H), 4.64 (q,  $J = 6.2$  Hz, 1H), 4.61 (1/2 AB,  $J = 11.8$  Hz, 1H) 2.22 (s, 3H) 1.63 (s, 3H) 1.60 (s, 3H) 1.50 (d,  $J = 6.2$  Hz, 3H);  $^{13}\text{C}$  (125 MHz,  $\text{CDCl}_3$ ) 208.5, 198.5, 153.0, 138.1, 131.3, 129.4, 128.3, 127.6, 127.5, 126.2, 122.1, 117.8, 105.3, 84.5, 81.7, 74.4, 71.0, 25.6, 25.0, 22.3, 16.6; IR  $\nu_{\text{max}}$ : 3065, 3030, 2981, 2864, 2097, 2057, 2016, 1659, 1587, 1492, 1445, 1240, 1155; HRMS  $m/e$  for  $\text{C}_{28}\text{H}_{24}\text{Co}_2\text{O}_9$  calcd (M -6CO) 454.0389 found 454.0393.

**Hexacarbonyl[ $\mu$ - $\eta^4$ -(2-(2-isopropylphenoxy)-6-methoxy-2-methylhex-4-yn-3-one)]dicobalt (6h)**

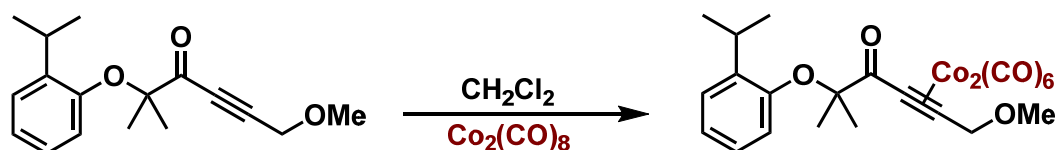

**GP4** was applied to propargyl ether ketone **10h** (0.2242 g, 0.81 mmol). Subsequent flash chromatography (25:1 hexanes : ethyl acetate) afforded **6h** as a dark red solid (0.3603 g, 79%), mp 51-53°C; <sup>1</sup>H NMR (300 MHz, CDCl<sub>3</sub>) δ 7.25 (dd, J = 7.2, 2.4 Hz, 1H), 7.04 – 6.94 (m, 2H), 6.57 (dd, J = 7.5, 1.2 Hz, 1H), 4.25 (s, 2H), 3.43 (s, 3H), 3.39 (sept, J = 7.2 Hz, 1H), 1.65 (s, 6H), 1.23 (d, J = 7.2 Hz, 6H); <sup>13</sup>C (75 MHz, CDCl<sub>3</sub>) 207.8, 198.4, 152.0, 139.3, 126.8, 125.9, 122.2, 117.0, 96.1, 84.2, 80.0, 72.6, 58.9, 26.5, 25.6, 23.0; IR  $\nu_{\text{max}}$ : 2966, 2941, 2870, 2096, 2041, 2006, 1658, 1609, 1584, 1486, 1160, 1126, 752; HRMS m/e for C<sub>23</sub>H<sub>22</sub>Co<sub>2</sub>O<sub>9</sub> calcd (M<sup>+</sup>+H) 561.0006 found 561.0001.

**Hexacarbonyl[ $\mu$ - $\eta^4$ -(6-(benzyloxy)-2-(4-chloro-3-methylphenoxy)-2-methylhept-4-yn-3-one)]dicobalt (**6i**)**

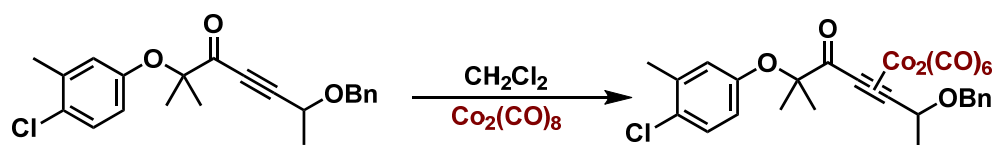

**GP4** was applied to propargyl ether ketone **10i** (0.1250 g, 0. mmol). Following the silica plug filtration, the compound was found to be sufficiently pure and **6i** was isolated as a dark red oil (0.1920 g, 90%); <sup>1</sup>H NMR (500 MHz, CDCl<sub>3</sub>): δ 7.32-7.27 (m, 5H), 7.20 (d, J = 8.7 Hz, 1H) 6.72 (d, J = 2.5 Hz, 1H), 6.63 (m, 1H), 4.72 – 4.67 (m, 2H), 4.63 (1/2 AB, J = 11.9 Hz, 1H), 2.31 (s, 3H), 1.56 (s, 6H), 1.54 (obscured d, J = 6.1 Hz, 3H), 1.52 (s, 3H); <sup>13</sup>C: (125 MHz, CDCl<sub>3</sub>) 206.8, 198.6, 152.4, 138.0, 137.0, 129.5, 128.9, 128.3, 127.6, 127.5, 124.1, 120.5, 104.3, 85.9, 81.6, 74.5, 71.0, 25.6, 25.0, 22.6, 20.2; IR  $\nu_{\text{max}}$ : 3064, 3030, 2981, 2936, 2866, 2097, 2057, 2019, 1662, 1596, 1455, 1154, 1092, 736, 697; HRMS m/e for C<sub>25</sub>H<sub>23</sub>ClCo<sub>2</sub>O<sub>6</sub> calcd (M-3CO) 571.9847 found 571.9851.

**Hexacarbonyl[ $\mu$ - $\eta^4$ -(6-(benzyloxy)-2-(4-methoxy-3-methylphenoxy)-2-methylhept-4-yn-3-one)]dicobalt (**6j**)**

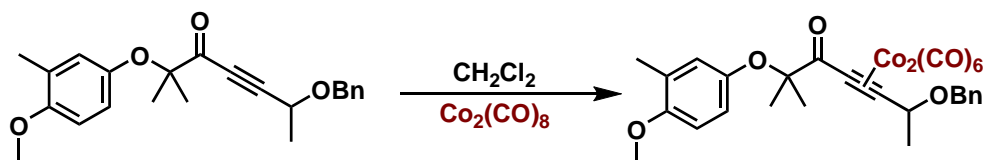

**GP4** was applied to propargyl ether ketone **10j** (0.1750 g, 0.48 mmol). Following the silica plug filtration, the compound was found to be sufficiently pure and **6j** was isolated as a dark red solid (0.2742 g, 88%), mp 52-55°C;  $^1\text{H NMR}$  (500 MHz,  $\text{CDCl}_3$ ) 7.40-7.30 (m, 5H), 6.71-6.74 (m, 3H), 4.84 (q,  $J = 6.2$  Hz, 1H), 4.75 (1/2 AB,  $J = 11.8$  Hz, 1H), 4.71 (1/2 AB,  $J = 11.8$  Hz, 1H), 3.86 (s, 3H), 2.23 (s, 3H), 1.61 (d,  $J = 6.2$  Hz, 3H), 1.57 (s, 3H), 1.54 (s, 3H);  $^{13}\text{C}$  (125 MHz,  $\text{CDCl}_3$ ) 207.0, 198.7, 154.2, 146.4, 138.2, 128.3, 127.5, 127.3, 125.4, 120.6, 110.1, 103.9, 86.0, 82.2, 74.8, 71.1, 55.6, 25.6, 25.2, 22.8, 16.3; IR  $\nu_{\text{max}}$ : 3030, 3006, 2975, 2869, 2096, 2057, 2013, 1665, 1497, 1455, 1217, 1143; HRMS  $m/e$  for  $\text{C}_{29}\text{H}_{26}\text{Co}_2\text{O}_{10}$  calcd ( $M - 3\text{CO}$ ) 568.0342 found 568.0344.

**Hexacarbonyl[ $\mu$ - $\eta^4$ -(4,5-didehydro-2,2-dimethyl-2H-benzo[b]oxocin-3(6H)-one)]dicobalt (**7a**)**

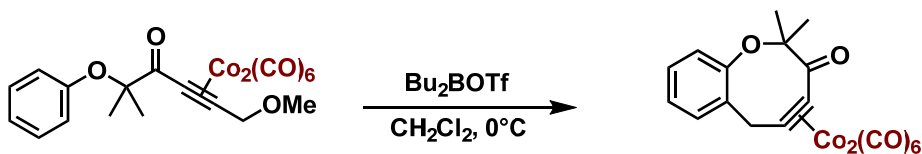

**General Procedure 5 (GP5):** To a solution of cobalt alkynyl ether complex **6a** (0.0614 g, 0.12 mmol) in dichloromethane (50 mL), at 0°C was added dibutyl boron triflate (178  $\mu\text{L}$ , 1M in  $\text{CH}_2\text{Cl}_2$ , 1.5 equiv). The solution was stirred for 15 min with monitoring by TLC. Saturated aqueous ammonium chloride was added and the mixture extracted with dichloromethane. The organic phase was dried ( $\text{MgSO}_4$ ) and concentrated under reduced pressure. Flash chromatography (25:1 hexanes :  $\text{Et}_2\text{O}$ ) afforded **7a** isolated as a dark red solid (0.0365g, 63%), mp 59-61°C;  $^1\text{H}$

NMR (300 MHz, CDCl<sub>3</sub>)  $\delta$  7.18-7.23 (m, 2H), 7.12 (dd, J = 8.4, 1.2 Hz, 1H), 7.01 (apparent dt, J = 1.2, 7.3 Hz, 1H), 4.28 (br, 2H), 1.73 (s, 6H); <sup>13</sup>C (75 MHz, CDCl<sub>3</sub>) 207.2, 198.3, 154.3, 136.3, 129.3, 128.1, 125.2, 124.1, 98.3, 88.2, 78.3, 38.5, 27.8 (br); IR  $\nu_{\text{max}}$  : 3066, 2983, 2873, 2097, 2040, 2015, 1659, 1593, 1454, 1152, 1133; HRMS m/e for C<sub>19</sub>H<sub>12</sub>Co<sub>2</sub>O<sub>8</sub> calcd (M<sup>+</sup>+H) 486.9274 found 486.9277.

**Hexacarbonyl[ $\mu$ - $\eta^4$ -(4,5-dihydro-2,2,6-trimethyl-2H-benzo[b]oxocin-3(6H)-one)]dicobalt (7aa)**

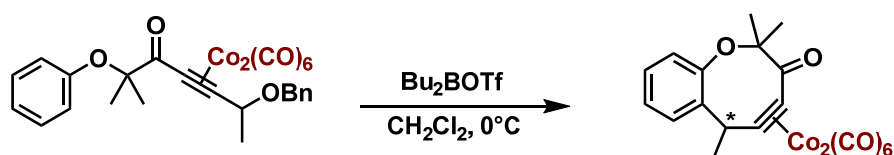

**GP5** was applied to cobalt protected alkyne ether complex **6aa** (0.0721 g, 0.12 mmol) using dibutyl boron triflate (178  $\mu$ L, 1M in CH<sub>2</sub>Cl<sub>2</sub>, 1.5 equiv). The product **7aa** was purified using Flash chromatography (25:1 petroleum ether : Et<sub>2</sub>O) followed by preparative TLC (25:1 petroleum ether:diethyl ether) afforded **7aa** as a dark red crystalline solid (0.0480 g, 81%), mp 84-85°C; <sup>1</sup>H NMR (500 MHz, CDCl<sub>3</sub>)  $\delta$  7.25 (m, 1H), 7.13 – 7.20 (m, 2H), 7.05 (m, 1H), 4.70 (broad s, 1H), 1.77 (s, 3H), 1.75 (obscured d, 3H); <sup>13</sup>C (125 MHz, CDCl<sub>3</sub>) 207.1, 198.4, 154.1, 140.4, 127.6, 125.3, 124.7, 124.0, 107.3, 88.5, 78.6, 36.5, 29.9, 25.8, 17.8; IR  $\nu_{\text{max}}$  : 2986, 2877, 2095, 2052, 2006, 1665, 1594, 1481, 1456, 1138, 1067; HRMS m/e for C<sub>20</sub>H<sub>14</sub>Co<sub>2</sub>O<sub>8</sub> calcd (M<sup>+</sup>+H) 500.9431 found 500.9429.

**Hexacarbonyl[ $\mu$ - $\eta^4$ -(4,5-dihydro-2,2,8-trimethyl-2H-benzo[b]oxocin-3(6H)-one)]dicobalt (7b)**

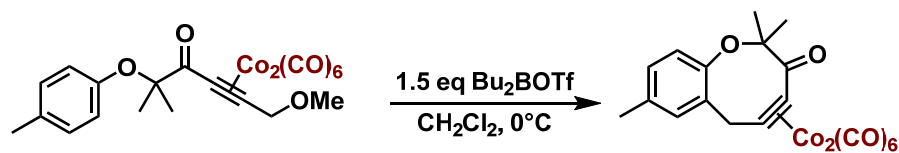

**GP5** was applied to cobalt protected alkynyl ether complex **6b** (0.0601 g, 0.11 mmol) using dibutyl boron triflate (1.5 equiv, 170 uL, 1 M in CH<sub>2</sub>Cl<sub>2</sub>, 1.5 equiv). Flash chromatography and preparative thin-layer chromatography (25:1 hexanes : ethyl acetate) afforded **7b** as a red oil (0.0485 g, 86%); <sup>1</sup>H NMR (300 MHz, CDCl<sub>3</sub>): 6.99 (m, 3H), 4.21 (br, 2H), 2.27 (s, 3H), 1.70 (s, 6H); at -30 °C the 4.21 resonance decoalesces to 4.55 (d, J = 15.2 Hz, 1H), 3.84 (d, J = 15.2 Hz, 1H); <sup>13</sup>C (75 MHz, CDCl<sub>3</sub>) 208.4, 198.1, 151.3, 135.8, 133.5, 129.7, 128.3, 124.5, 98.2, 87.8, 38.1, 29.6, 25.3, 20.6; IR  $\nu_{\max}$  : 3020, 2995, 2928, 2098, 2060, 2027, 1661, 1601, 1527, 1493, ; HRMS m/e for C<sub>20</sub>H<sub>14</sub>Co<sub>2</sub>O<sub>8</sub> calcd (M<sup>+</sup>+H) 500.9430 found 500.9423.

**Hexacarbonyl[ $\mu$ - $\eta^4$ -(8-tert-butyl-4,5-didehydro-2,2-dimethyl-2H-benzo[b]oxocin-3(6H)-one)]dicobalt (7c)**

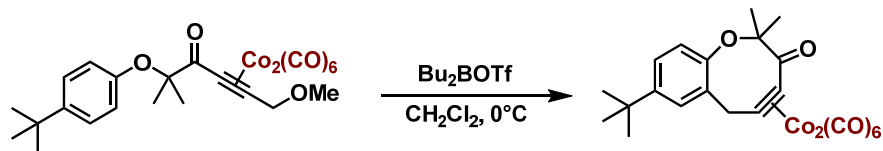

**GP5** was applied to cobalt protected alkynyl ether complex **6c** (0.0627 g, 0.11 mmol) using dibutyl boron triflate (0.160 uL, 1M in CH<sub>2</sub>Cl<sub>2</sub>, 1.5 equiv). Flash chromatography (25:1 hexanes : ethyl acetate) afforded **7c** as a dark red solid (0.0446g, 75%), mp 59-60°C; <sup>1</sup>H NMR (300 MHz, CDCl<sub>3</sub>): 7.16-7.20 (m, 2H), 7.03 (m, 1H), 4.24 (br, 2H), 1.71 (s, 6H), 1.27 (s, 9H); <sup>13</sup>C (75 MHz, CDCl<sub>3</sub>) 207.4, 198.2, 151.8, 147.0, 135.7, 126.3, 124.7, 124.5, 99.0, 88.0, 78.7, 38.8, 34.2, 31.3; IR  $\nu_{\max}$  : 2961, 2932, 2869, 2093, 2047, 2006, 1653, 1605, 1494, 1461, 832; HRMS m/e for C<sub>23</sub>H<sub>20</sub>Co<sub>2</sub>O<sub>8</sub> calcd (M<sup>+</sup>+H) 542.9900 found 542.9902.

**Hexacarbonyl[ $\mu$ - $\eta^4$ -(8-tert-butyl-4,5-didehydro-2,2,6-trimethyl-2H-benzo[b]oxocin-3(6H)-one)]dicobalt (7cc)**



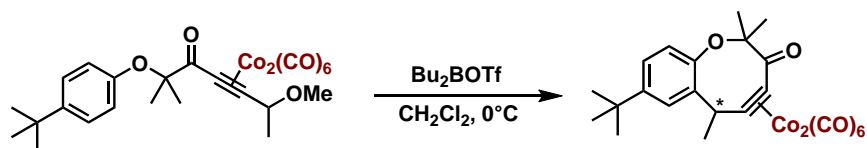

**GP5** was applied to cobalt protected alkyne ether complex **6cc** (0.1057 g, 0.18 mmol) using dibutyl boron triflate (270  $\mu$ L, 1M in  $\text{CH}_2\text{Cl}_2$ , 1.5 equiv) Flash chromatography (25:1 hexanes :  $\text{Et}_2\text{O}$ ) afforded **7cc** as a dark red solid (0.0748g, 75%), mp 86-87°C;  $^1\text{H}$  NMR (300 MHz,  $\text{CDCl}_3$ ): 7.27-7.15 (m, 2H), 7.04 (d,  $J = 8.7$  Hz, 1H), 4.69 (br, 1H), 1.76 (br s, 6H), 1.72 (obscured d, 3H), 1.27 (s, 9H);  $^{13}\text{C}$  (75 MHz,  $\text{CDCl}_3$ ) 207.4, 198.1, 151.7, 146.6, 139.6, 128.8, 124.1, 122.0, 107.8, 88.2, 79.1, 36.6, 34.4, 31.3, 30.0, 25.8, 17.8; IR  $\nu_{\text{max}}$ : 3116, 3074, 3044, 2966, 2869, 2096, 2058, 2019, 1662, 1586, 1490, 1463, 1140, 1125; HRMS  $m/e$  for  $\text{C}_{24}\text{H}_{22}\text{Co}_2\text{O}_8$  calcd ( $\text{M}^+\text{+H}$ ) 557.0057 found 557.0043.

**Hexacarbonyl[ $\mu$ - $\eta^4$ -(4,5-didehydro-8-methoxy-2,2,6-trimethyl-2H-benzo[b]oxocin-3(6H)-one)]dicobalt (**7d**)**

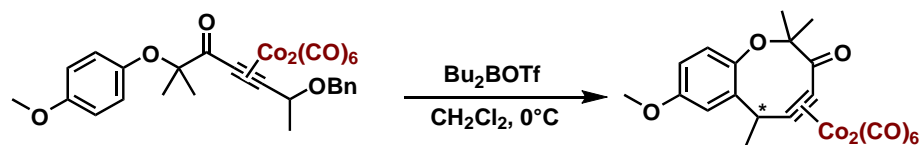

**GP5** was applied to cobalt protected alkyne ether complex **6c** (0.0614 g, 0.10 mmol) using dibutyl boron triflate (144  $\mu$ L, 1M in  $\text{CH}_2\text{Cl}_2$ , 1.5 equiv) Flash chromatography (25:1 petroleum ether :  $\text{Et}_2\text{O}$ ) followed by prep TLC (25:1 ether:diethyl ether) which afforded **7d** as a dark red crystalline solid (0.0405 g, 79%), mp 136-137°C (dec.).  $^1\text{H}$  NMR (500 MHz,  $\text{CDCl}_3$ )  $\delta$  7.06 (d,  $J = 8.8$  Hz, 1H), 6.79 (s, 1H), 6.68 (dd,  $J = 8.8, 2.9$  Hz, 1H), 4.68 (br q,  $J = 6.2$  Hz, 1H), 3.76 (s, 3H), 1.75 (s, 3H), 1.73 (s, 3H), 1.71 (br, 3H);  $^{13}\text{C}$  (125 MHz,  $\text{CDCl}_3$ ) 207.3, 198.2, 155.7, 147.7, 141.6, 125.2, 112.1, 111.1, 107.0, 88.1, 78.9, 55.6, 36.5, 29.9, 25.7, 17.8; IR  $\nu_{\text{max}}$ : 3066, 2983, 2873, 2097, 2061, 2015, 1659, 1583, 1454, 1152, 1133; HRMS  $m/e$  for  $\text{C}_{21}\text{H}_{16}\text{Co}_2\text{O}_9$  calcd ( $\text{M}^+\text{+H}$ ) 530.5936 found 530.5942.

**Hexacarbonyl[ $\mu$ - $\eta^4$ -(4,5-didehydro-2,2,6,9-tetramethyl-2H-benzo[b]oxocin-3(6H)-one)]dicobalt (7f)**

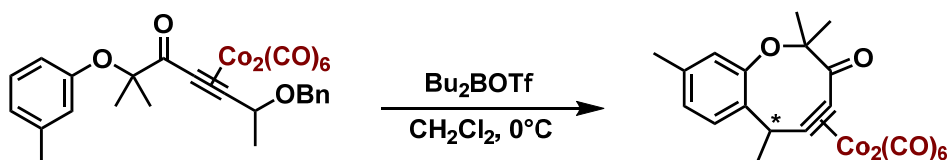

**GP5** was applied to cobalt protected alkyne ether complex **6f** (0.0758 g, 0.12 mmol) using dibutyl boron triflate (182  $\mu$ L, 1M in  $\text{CH}_2\text{Cl}_2$ , 1.5 equiv). Flash chromatography (25:1 petroleum ether :  $\text{Et}_2\text{O}$ ) followed by prep TLC (25:1 ether:diethyl ether) afforded **7f** as a dark red crystalline solid (0.0385 g, 61%), mp 54-56°C;  $^1\text{H}$  NMR (500 MHz,  $\text{CDCl}_3$ )  $\delta$  7.10 (d,  $J = 7.3$  Hz, 1H), 6.94 (s, 1H), 6.85 (d,  $J = 7.3$  Hz, 1H), 4.64 (broad s, 1H), 2.29 (s, 3H), 1.77 (s, 3H), 1.72 (obscured d, 3H), 1.72 (s, 3H);  $^{13}\text{C}$  (125 MHz,  $\text{CDCl}_3$ ) 207.2, 198.1, 154.0, 137.6, 137.4, 125.4, 124.9, 124.6, 107.8, 88.2, 78.9, 36.3, 30.0, 25.8, 21.1, 17.9; IR  $\nu_{\text{max}}$ : 2979, 2873, 2095, 2054, 2005, 1661, 1588, 1491, 1454, 1136, 1065; HRMS  $m/e$  for  $\text{C}_{21}\text{H}_{16}\text{Co}_2\text{O}_8$  calcd ( $\text{M}^++\text{H}$ ) 548.9207 found 548.9198.

**Hexacarbonyl[ $\mu$ - $\eta^4$ -(4,5-didehydro-2,2,6,10-tetramethyl-2H-benzo[b]oxocin-3(6H)-one)]dicobalt (7g)**

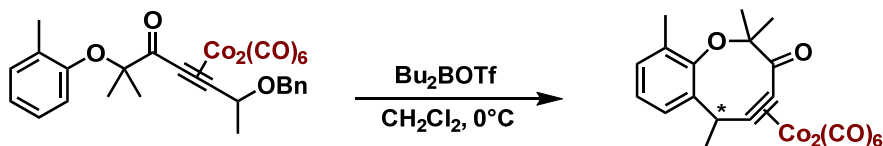

**GP5** was applied to cobalt protected alkyne ether complex **6g** (0.0647 g, 0.10 mmol) using dibutyl boron triflate (155  $\mu$ L, 1M in  $\text{CH}_2\text{Cl}_2$ , 1.5 equiv). Flash chromatography (25:1 petroleum ether :  $\text{Et}_2\text{O}$ ) followed by prep TLC (25:1 ether:diethyl ether) which yielded **7g** as a dark red crystalline solid (0.0441 g, 82%), mp 76-77°C;  $^1\text{H}$  NMR (300 MHz,  $\text{CDCl}_3$ )  $\delta$  7.11-7.14 (m, 2H), 7.01 (apparent t,  $J = 7.5$  Hz, 1H), 4.40 (q,  $J = 7.0$  Hz, 1H), 2.37 (s, 3H), 1.71 (d,  $J = 7.0$  Hz, 3H), 1.64 (br s, 3H), 1.56 (br s, 3H)  $^{13}\text{C}$  (75 MHz,  $\text{CDCl}_3$ ) 206.7, 198.5, 153.0, 139.9, 134.1, 130.6, 125.4,

124.1, 104.4, 88.6, 77.9, 29.7, 25.6, 25.1, 22.5, 19.2; IR  $\nu_{\text{max}}$  : 3003, 2937, 2865, 2096, 2052, 2007, 1659, 1578, 1481, 1456, 1151, 1121; HRMS m/e for  $\text{C}_{21}\text{H}_{16}\text{Co}_2\text{O}_8$  calcd ( $\text{M}^+\text{H}$ ) 514.9587 found 514.9600.

**Hexacarbonyl[ $\mu$ - $\eta^4$ -(4,5-didehydro-10-isopropyl-2,2-dimethyl-2H-benzo[b]oxocin-3(6H)-one)]dicobalt (7h)**

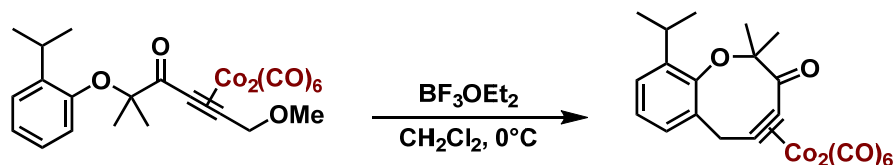

A modified **GP5** was applied to cobalt protected alkyne ether complex **6h** (0.0946 g, 0.17 mmol) using boron trifluoride diethyl etherate (0.68 mmol, 85  $\mu\text{L}$ , 4.0 equiv), and allowing the reaction to progress for 1.5 h. Flash chromatography and preparative thin-layer chromatography (25:1 hexanes : ethyl acetate) afforded **7h** as a red oil (0.0512 g, 57%). Product indicated by  $^1\text{H}$  NMR (300 MHz,  $\text{CDCl}_3$ ):  $\delta$  7.22 (m, 1H), 7.08 – 7.04 (m, 2H) 4.39 (s, 2H) 3.40 (sept,  $J = 6.9$  Hz, 1H) 1.57 (s, 6H) 1.20 (d,  $J = 6.9$  Hz, 6H);  $^{13}\text{C}$  (75 MHz,  $\text{CDCl}_3$ ) 207.7, 198.5, 151.0, 145.3, 133.2, 127.8, 125.6, 124.7, 96.3, 88.9, 79.5, 39.5, 27.6, 25.3, 23.5; IR  $\nu_{\text{max}}$  : 2967, 2936, 2870, 2097, 2057, 2018, 1669, 1614, 1584, 1457, 1135, 777; HRMS m/e for  $\text{C}_{22}\text{H}_{18}\text{Co}_2\text{O}_8$  calcd ( $\text{M}^+\text{H}$ ) 528.9743 found 528.9742.

**Hexacarbonyl[ $\mu$ - $\eta^4$ -(4,5-didehydro-2,2,6,8,9-pentamethyl-2H-benzo[b]oxocin-3(6H)-one)]dicobalt (7i)**

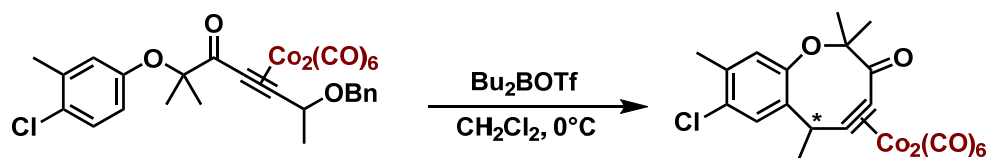

**GP5** was applied to cobalt protected alkyne ether complex **6i** (0.0815 g, 0.12 mmol) using dibutyl boron triflate (186  $\mu\text{L}$ , 1 M in  $\text{CH}_2\text{Cl}_2$ , 1.5 equiv). Flash chromatography (30:1 petroleum ether :

Et<sub>2</sub>O) followed by prep TLC yielded (30:1 petroleum ether : Et<sub>2</sub>O) **7i** as a dark red crystalline solid (0.0401 g, 59%), mp 56-57°C; <sup>1</sup>H NMR (500 MHz, CDCl<sub>3</sub>): δ 7.19 (s, 1H), 7.00 (s, 1H), 4.61 (br, 1H), 2.30 (s, 3H), 1.75 (s, 3H), 1.72 (d, J = 7.1 Hz, 3H), 1.71 (s, 3H); <sup>13</sup>C (125 MHz, CDCl<sub>3</sub>) 206.7, 198.0, 152.4, 139.5, 135.1, 129.3, 127.0, 125.8, 106.5, 88.6, 78.6, 36.2, 29.8, 25.7, 20.0, 17.8; IR ν<sub>max</sub> : 2985, 2877, 2095, 2054, 2010, 1666, 1594, 1482, 1456, 1137, 1067; HRMS m/e for C<sub>21</sub>H<sub>16</sub>Co<sub>2</sub>O<sub>8</sub> calcd (M<sup>+</sup>+H) 514.9587 found 514.9581.

**Hexacarbonyl[μ-η<sup>4</sup>-(4,5-didehydro-8-methoxy-2,2,6,9-tetramethyl-2H-benzo[b]oxocin-3(6H)-one)]dicobalt (7j)**

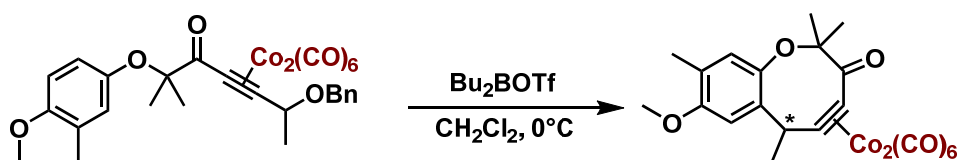

**GP5** was applied to cobalt protected alkyne ether complex **6j** (0.0647 g, 0.10 mmol) using dibutyl boron triflate (150 uL, 1 M in CH<sub>2</sub>Cl<sub>2</sub>, 1.5 equiv). Flash chromatography (25:1 petroleum ether : Et<sub>2</sub>O) followed by prep TLC (25:1 petroleum ether : Et<sub>2</sub>O) afforded **7j** as a dark red crystalline solid (0.0426 g, 79%), mp 54-56°C; <sup>1</sup>H NMR (300 MHz, CDCl<sub>3</sub>) δ 6.92 (s, 1H), 6.67 (s, 1H), 4.66 (br, 1H), 3.79 (s, 3H), 2.14 (s, 3H), 1.70-1.75 (m, 9H); <sup>13</sup>C (75 MHz, CDCl<sub>3</sub>) 207.4, 198.2, 153.9, 147.2, 138.3, 126.94, 126.92, 125.6, 107.5, 87.8, 55.9, 36.5, 30.0, 25.8, 18.0, 16.0; IR ν<sub>max</sub> : 2998, 2850, 2095, 2055, 2001, 1671, 1589, 1495, 1463, 1135, 1061; HRMS m/e for C<sub>22</sub>H<sub>18</sub>Co<sub>2</sub>O<sub>9</sub> calcd (M<sup>+</sup>+H) 544.9693 found 544.9692

**8-tert-Butyl-2,2,6-trimethyl-4-(triethylsilyl)-2H-benzo[b]oxocin-3(6H)-one (11cc)**

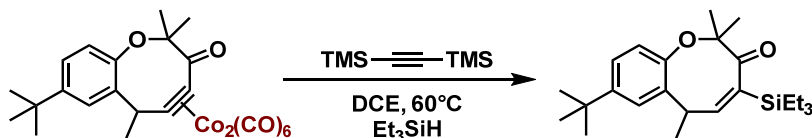

**General procedure 6 (GP6):** Triethylsilane (102  $\mu$ L, 0.64 mmol) was added to a mixture containing cyclooctyne complex **7cc** (71.4 mg, 0.13 mmol) and bis(trimethylsilyl)acetylene (55  $\mu$ L, 0.26 mmol) in degassed 1,2-dichloroethane (15 mL) at room temperature. The reaction mixture was heated to 60°C until TLC showed complete consumption of the complexed cyclooctyne (3 h). The resulting mixture was concentrated under reduced pressure and the residue was passed through a plug of silica using hexane as solvent. Preparative thin-layer chromatography (20:1 hexanes : Et<sub>2</sub>O) afforded vinyltriethylsilane **11cc** (35.8 mg, 0.09 mmol, 72%) as an off- white solid, mp 45-47°C; <sup>1</sup>H NMR (300 MHz, CDCl<sub>3</sub>) 7.11-7.17 (m, 2H), 6.90 (d, J = 8.1 Hz, 1H), 6.07 (d, J = 6.3 Hz, 1H), 3.70 (br m, 1H), 1.48 (d, J = 6.9, 3H), 1.46 (s, 3H), 1.45 (s, 3H), 1.28 (s, 9H), 0.94 (t, J = 7.8 Hz, 9H), 0.66 (m, 6H); <sup>13</sup>C (75 MHz, CDCl<sub>3</sub>) 210.8, 151.9, 147.7, 147.5, 139.4, 135.2, 124.2, 124.13, 124.10, 85.9, 40.2, 34.4, 31.5, 26.5, 23.5, 19.0, 7.1, 3.5; IR  $\nu_{\text{max}}$  : 2955, 2872, 1672, 1608, 1496, 1459, 1145, 1080; HRMS m/e for C<sub>24</sub>H<sub>38</sub>O<sub>2</sub>Si calcd (M<sup>+</sup>+H) 387.2719 found 387.2719.

**8-Methoxy-2,2,6,9-tetramethyl-4-(triethylsilyl)-2H-benzo[b]oxocin-3(6H)-one (11j)**

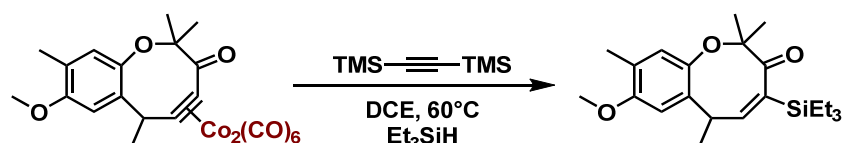

**GP6** was applied to cyclic cobalt complex **7j** (41.4 mg, 0.08 mmol). The residue was passed through a plug of silica using hexane as solvent. Preparative thin-layer chromatography (20:1 hexanes : Et<sub>2</sub>O) afforded the vinyltriethylsilane **11j** (26.2 mg, 92%) as an colorless oil; <sup>1</sup>H NMR (300 MHz, CDCl<sub>3</sub>): 6.79 (s, 1H), 6.55 (s, 1H), 6.08 (d, J = 6.0 Hz, 1H), 3.79 (s, 3H), 3.71 (br m, 1H), 2.15 (s, 3H), 1.48 (d, J = 7.2 Hz, 3H), 1.46 (s, 3H), 1.43 (s, 3H), 0.93 (t, J = 7.8 Hz, 9H), 0.62 (m, 6H); <sup>13</sup>C(75 MHz, CDCl<sub>3</sub>): 210.6, 154.7, 147.4, 139.6, 134.0, 128.4, 126.9, 125.5, 109.1, 85.8, 40.1, 26.1, 23.6, 19.1, 15.7, 7.2, 3.5; HRMS m/e for C<sub>22</sub>H<sub>34</sub>O<sub>3</sub>Si calcd (M<sup>+</sup>+H) 374.2277 found 261.1491.

### 8-Methoxy-2,2,6,9-tetramethyl-2H-benzo[b]oxocin-3(4H)-one (13)

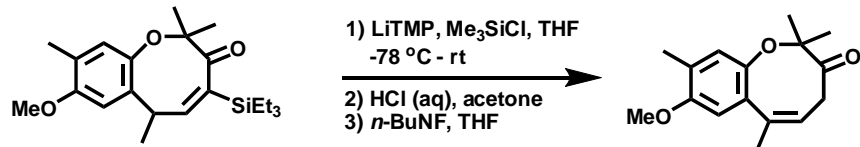

To a solution of 2,2,6,6-tetramethylpiperidine (0.16 mL, 0.94 mmol, 5 equiv) in THF (5 mL) at 0 °C was added *n*-BuLi (0.37 mL, 2.5 M, 0.93 mmol, 5 equiv). The solution was stirred at 0 °C for 30 min and added by syringe to a solution of **11j** (0.0687 g, 0.183 mmol) and chlorotrimethylsilane (0.14 mL, 1.1 mmol, 6 equiv) in THF (3 mL) at -78 °C. The solution was stirred at -78 °C for 1 h and allowed to warm to rt for 30 min. NH<sub>4</sub>Cl (aq) was added and the mixture subjected to a conventional extractive workup. The crude material was dissolved in acetone (10 mL) and 3 M HCl (1 mL) was added. The mixture was stirred for 1 h, and NaHCO<sub>3</sub> (aq) was added. Following the removal of acetone under reduced pressure, the mixture was subjected to a conventional extractive workup. The crude product was dissolved in THF (5 mL), and NH<sub>4</sub>Cl(aq) (7 drops) and *n*-Bu<sub>4</sub>NF (0.27 mL, 1 M, 0.27 mmol, 1.5 equiv) was added. After 10 h, the mixture was subjected to a conventional extractive workup. Following preparative TLC (15:1 petroleum ether : Et<sub>2</sub>O) afforded **13** (0.0350 g, 73%) as a colorless oil, which was spectroscopically identical to the literature report;<sup>4,5</sup> <sup>1</sup>H NMR (300 MHz, CDCl<sub>3</sub>) 6.88 (s, 1H), 6.64 (s, 1H), 5.75 (dq, J = 7.7, 1.5 Hz, 1H), 3.83 (s, 3H), 2.98 (d, J = 7.7 Hz, 2H), 2.21 (s, 3H), 2.06 (m, 3H), 1.47 (s, 6H); <sup>13</sup>C (75 MHz, CDCl<sub>3</sub>) 208.7, 154.6, 145.1, 137.2, 132.9, 127.5, 126.4, 119.4, 108.5, 81.7, 55.6, 41.0, 24.6, 23.8, 16.1.

### 8-Methoxy-2,2,6,9-tetramethyl-2H-benzo[b]oxocin-3(6H)-one (14)

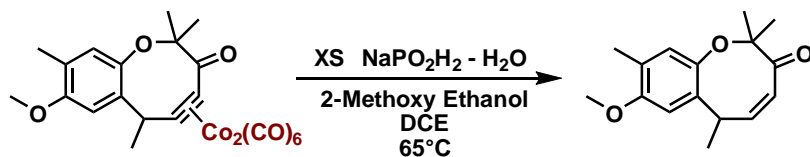

Sodium hypophosphite monohydrate (112.4 mg, 1.27 mmol) was added to a mixture of the cyclooctyne complex **7j** (139.0 mg, 0.26 mmol) in 1,2-dichloroethane/2-methoxyethanol (5 mL + 15 mL) at room temperature. The reaction was heated to 65°C for 4 hours (with monitoring by TLC). The mixture was cooled to room temperature and filtered through a plug of Celite®. The resulting solution was washed with brine and extracted with ethyl acetate. The organic phase was dried using magnesium sulfate and concentrated under reduced pressure to afford an orange oil. Preparative TLC (10:1 hexanes : Et<sub>2</sub>O) gave, in order of elution, recovered **7j** (3.8 mg, 3%) and **14** as a light yellow oil (36.3 mg, 55%, 57% BRSM); <sup>1</sup>H NMR (300 MHz, CDCl<sub>3</sub>) 6.86 (s, 1H), 6.56 (s, 1H), 6.23 (dd, J = 12.9, 5.1 Hz, 1H), 5.77 (dd, J = 12.9, 2.1 Hz, 1H), 3.88 (br m, 1H), 3.78 (s, 3H), 2.16 (s, 3H), 1.55 (s, 3H), 1.54 (s, 3H), 1.51 (d, J = 7.5 Hz, 3H); <sup>13</sup>C (75 MHz, CDCl<sub>3</sub>) 206.0, 154.8, 147.5, 144.2, 135.6, 126.8, 126.2, 125.5, 109.5, 87.3, 55.7, 38.5, 25.6, 24.7, 19.5, 15.8; C<sub>16</sub>H<sub>21</sub>O<sub>3</sub> calcd (M<sup>+</sup>+H) 261.1491 found 261.1491.

### Heliannuol K methyl ether (**3b**)

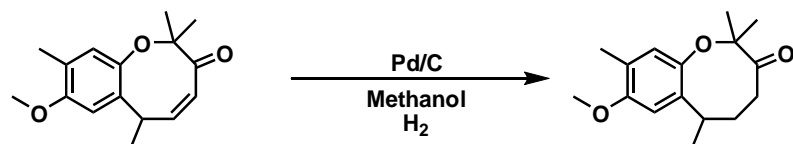

To a round bottom flask containing the enone (36.3 mg, 0.14 mmol) in methanol (5 mL) added 5% Pd/C (10 mg) and was allowed to stir at room temperature under a hydrogen atmosphere. The reaction mixture was filtered through a glass-frit which was then concentrated under reduced pressure. The following crude product was filtered through a plug of silica to give Heliannuol K methyl ether (**3b**) (32.8 mg, 90%) as a colorless oil. Product indicated by <sup>1</sup>H NMR (300 MHz, CDCl<sub>3</sub>): 6.74 (s, 1H), 6.58 (s, 1H), 3.80 (s, 3H), 3.12 (m, 1H), 2.40-2.55 (m, 2H), 2.16 (s, 3H), 2.02 (m, 1H), 1.71 (m, 1H), 1.50 (s, 3H), 1.47 (s, 3H), 1.33 (d, J = 7.1 Hz, 3H); <sup>13</sup>C (75 MHz,

CDCl<sub>3</sub>) 213.0, 154.0, 146.0, 137.0, 127.5, 124.4, 108.8, 86.0, 55.5, 36.1, 34.7, 34.5, 24.4, 23.5, 20.5, 15.8.<sup>5</sup>

The following is a <sup>1</sup>H and <sup>13</sup>C NMR spectra comparison between the currently prepared **3b** and the literature report.<sup>5</sup>

| <sup>1</sup> H NMR<br>current work | <sup>1</sup> H NMR <sup>5</sup> | <sup>13</sup> C NMR<br>current work |      | <sup>13</sup> C NMR <sup>5</sup> |       |
|------------------------------------|---------------------------------|-------------------------------------|------|----------------------------------|-------|
| 6.74 (s, 1H)                       | 6.74 (s, 1H)                    | 213.0                               | 34.5 | 212.98                           | 34.46 |
| 6.58 (s, 1H)                       | 6.58 (s, 1H)                    | 154.0                               | 24.4 | 154.86                           | 24.36 |
| 3.80 (s, 3H)                       | 3.80 (s, 3H)                    | 146.0                               | 23.5 | 145.96                           | 23.45 |
| 3.12 (m, 1H)                       | 3.02-3.20 (m, 1H)               | 137.0                               | 20.5 | 136.90                           | 20.43 |
| 2.40-2.55 (m, 2H)                  | 2.39-2.61 (m, 2H)               | 127.5                               | 15.8 | 127.46                           | 15.78 |
| 2.16 (s, 3H)                       | 2.15 (s, 3H)                    | 124.4                               |      | 124.37                           |       |
| 2.02 (m, 1H)                       | 1.90-2.07 (m, 1H)               | 108.8                               |      | 108.71                           |       |
| 1.71 (m, 1H)                       | 1.61-1.79 (m, 1H)               | 86.0                                |      | 85.91                            |       |
| 1.50 (s, 3H)                       | 1.49 (s, 3H)                    | 55.5                                |      | 55.45                            |       |
| 1.47 (s, 3H)                       | 1.45 (s, 3H)                    | 36.1                                |      | 36.03                            |       |
| 1.33 (d, J = 7.1 Hz, 3H)           | 1.34 (d, J = 7.1 Hz, 3H)        | 34.7                                |      | 34.65                            |       |

---

## References

- (1) Wang, B.; Tang, C.; Han, Y.; Guo, R.; Qian, H.; Huang, W. Synthesis and Preliminary Antihyperlipidaemic Activities Evaluation of Andrographolide Derivatives. *Med. Chem.* **2012**, 293–298.
- (2) Ramalingam, T.; Sattur, P. B. Synthesis and Biological Activity of  $\alpha$ -(3-Pentadecylaryloxy) Isobutyric Acids, Their Hydrazides and Cyclic Derivatives: Oxadiazoles and Pyrroles. *Indian J. Chem., Sect. B: Org. Chem. Incl. Med. Chem.* **1989**, 28B, 611-613.
- (3) Shimizu, T.; Osako, K.; Nakata, T. Efficient Method for Preparation of N-Methoxy-N-methyl Amides by Reaction of Lactones or Esters with Me<sub>2</sub>AlCl-MeONHMe•HCl. *Tetrahedron Lett.* **1997**, 38, 2685–2688.
- (4) Lecornue, F.; Paugam, R.; Ollivier, J. Strategies for the Total Asymmetric Synthesis of Heliannuols K and L: Scope and Limitations. *Eur. J. Org. Chem.* **2005**, 2589-2598.
- (5) Lecornue, F.; Ollivier, J. Convergent Formal Synthesis of ( $\pm$ )-Heliannuols A, K, and L From a Common Intermediate. *Synlett* **2004**, 1613-1615.



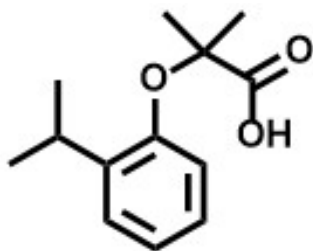

**8h**

300 MHz, CDCl<sub>3</sub>

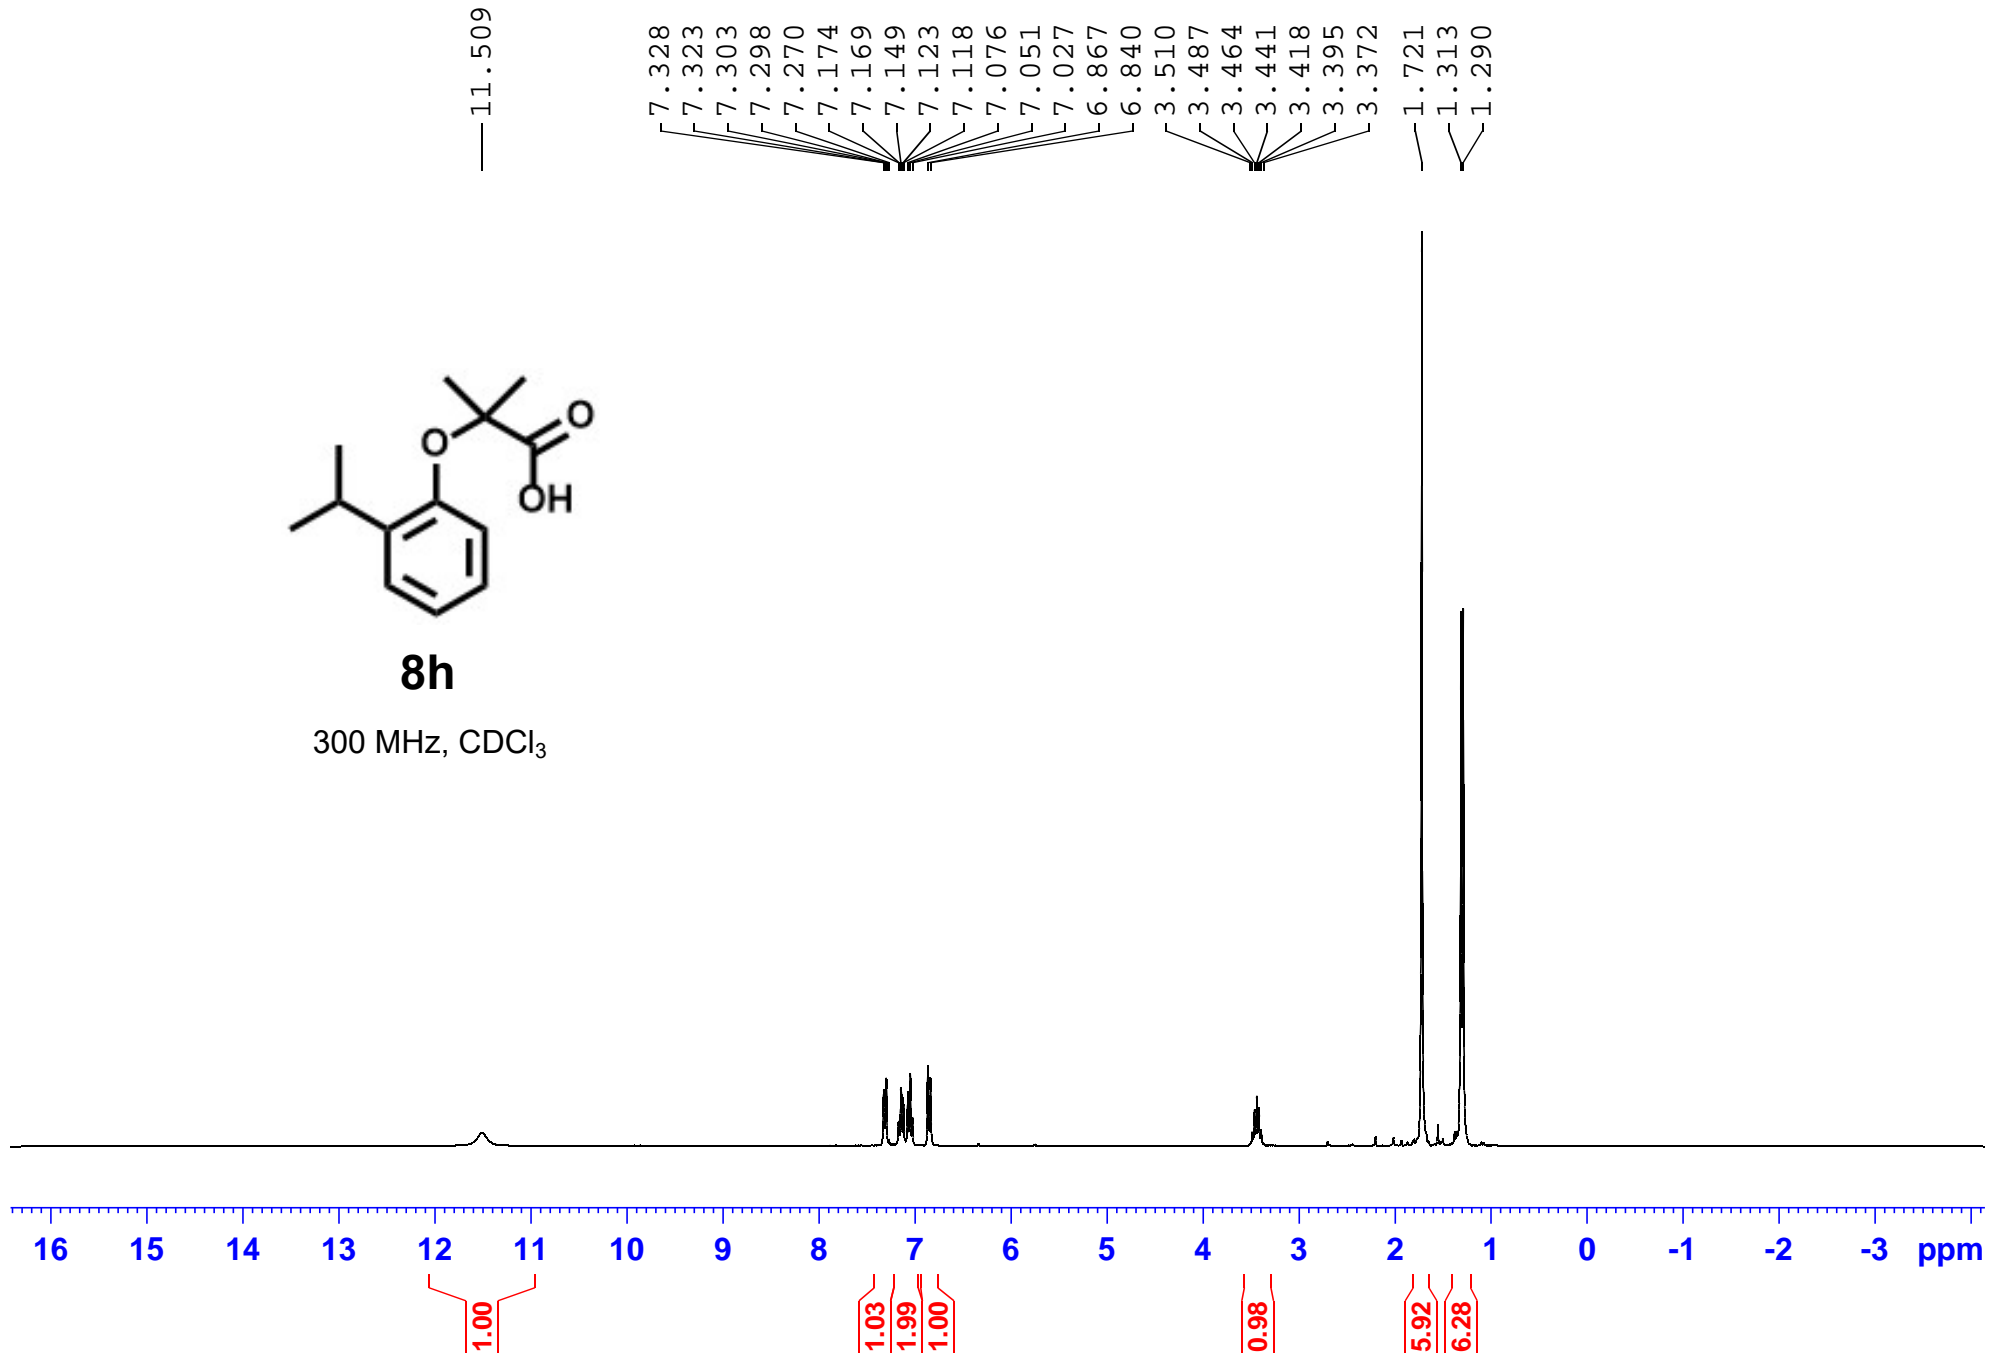

— 180.634

— 152.048

— 139.734

— 126.529

— 125.987

— 122.322

— 116.877

— 77.425

— 77.003

— 76.578

— 26.864

— 25.220

— 22.792

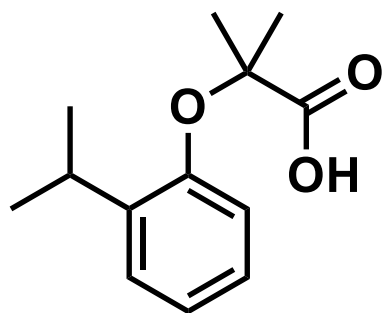

**8h**

75 MHz, CDCl<sub>3</sub>

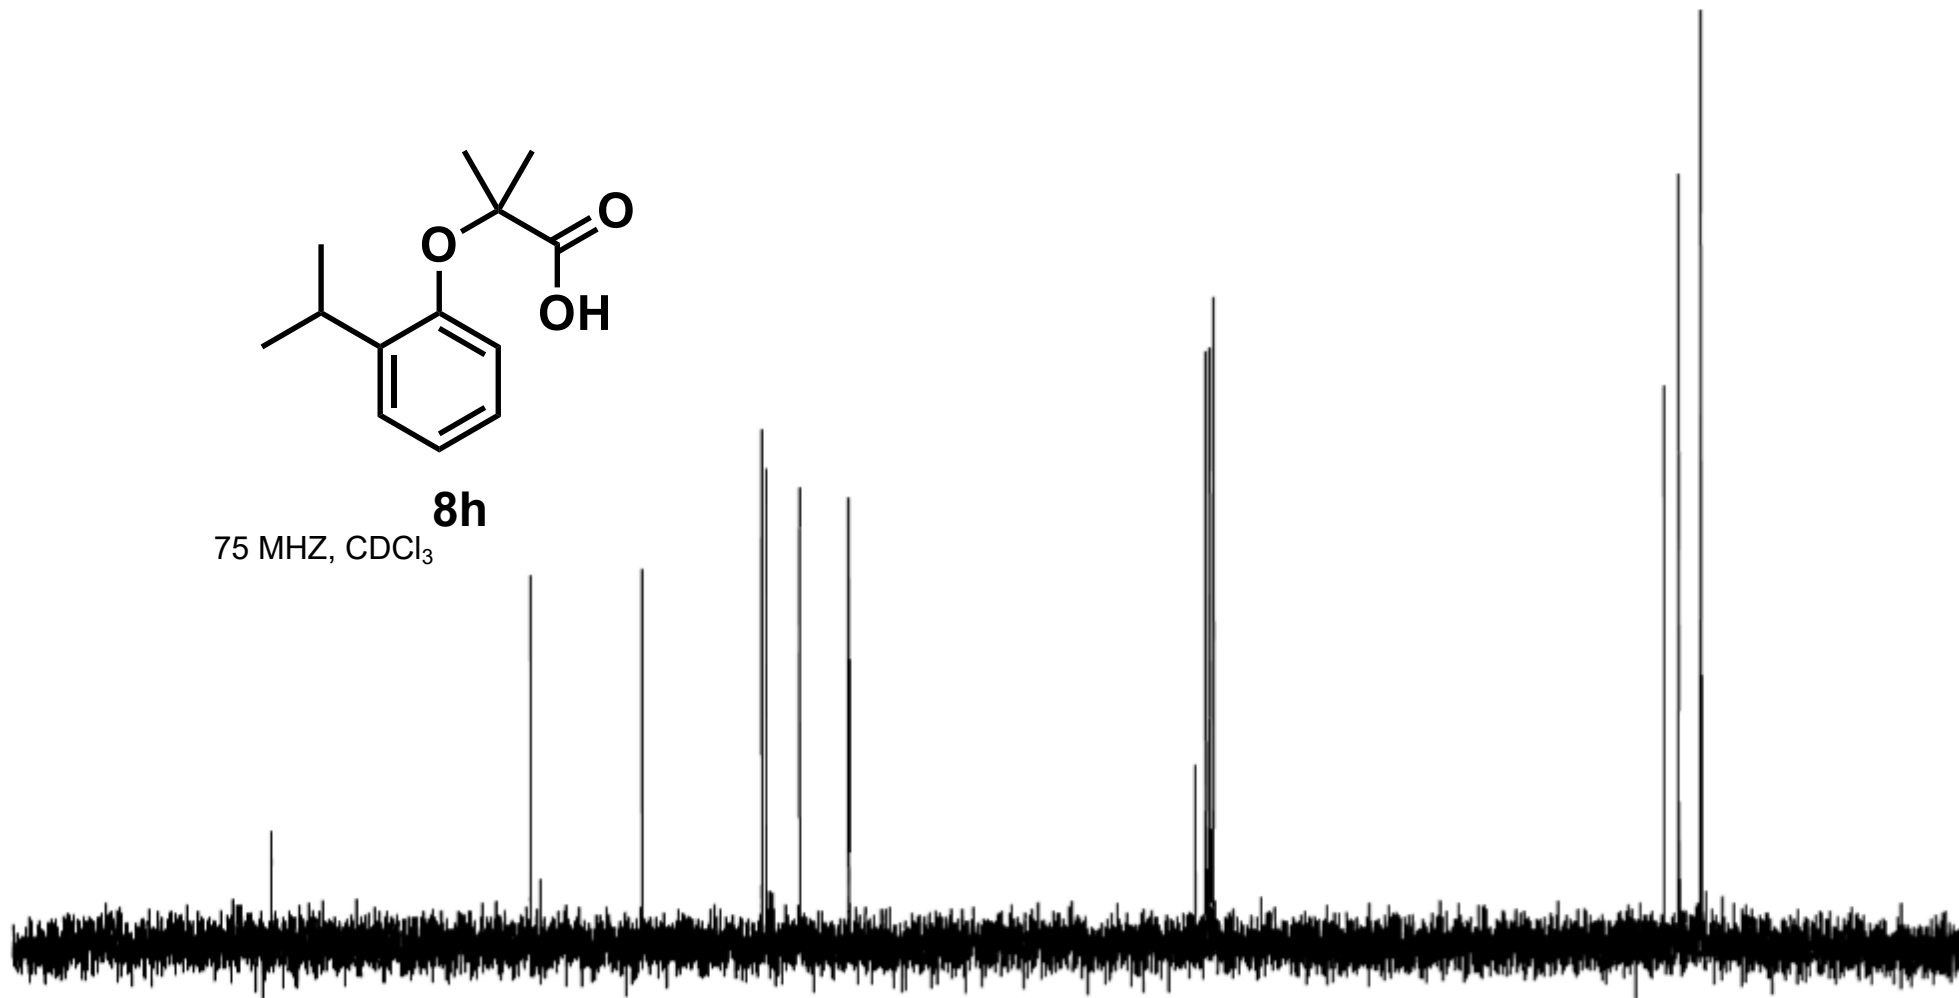

200 190 180 170 160 150 140 130 120 110 100 90 80 70 60 50 40 30 20 10 ppm

bs0.0708 2 300 B82, bargellini prod, 7/8/21

7.270  
6.800  
6.775  
6.766  
6.736  
6.705

3.813

2.196

1.541

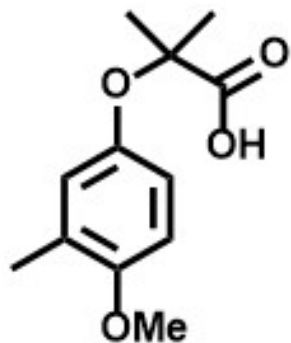

**8j**

300 MHz, CDCl<sub>3</sub>

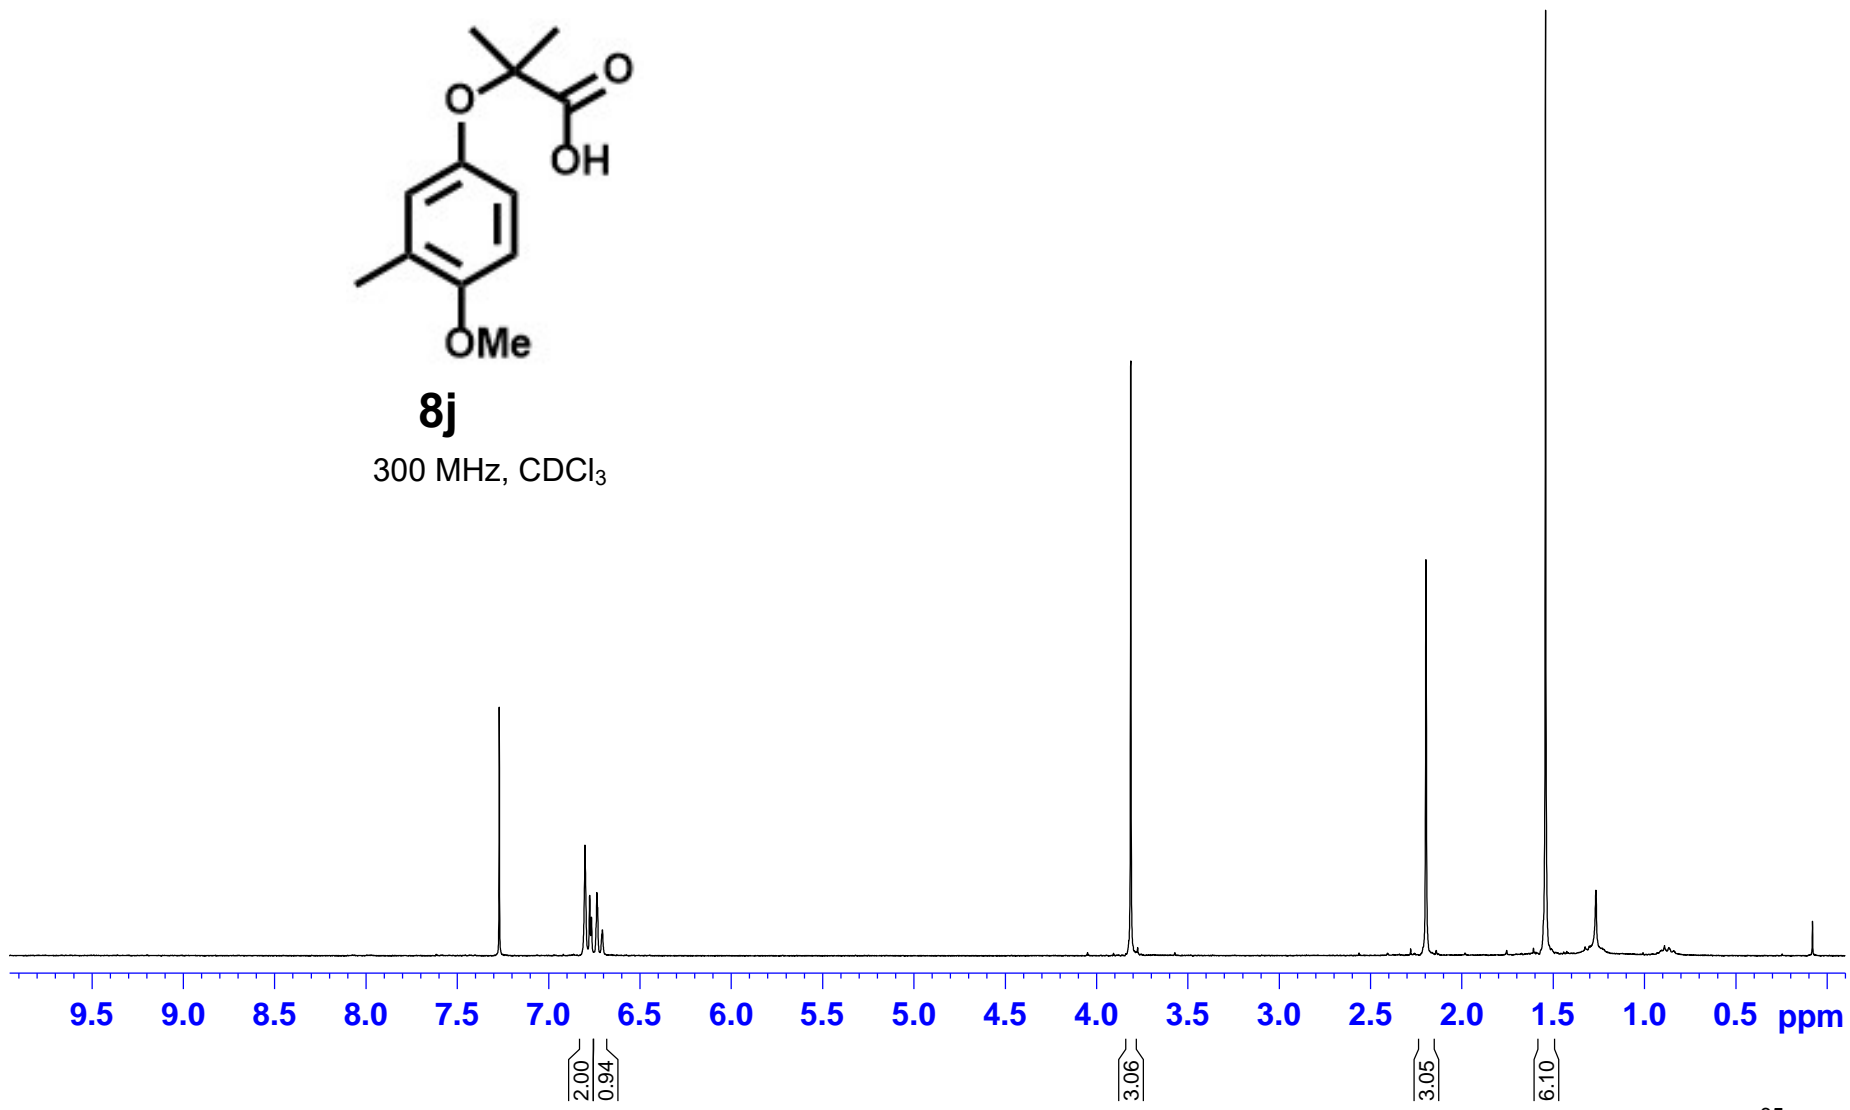

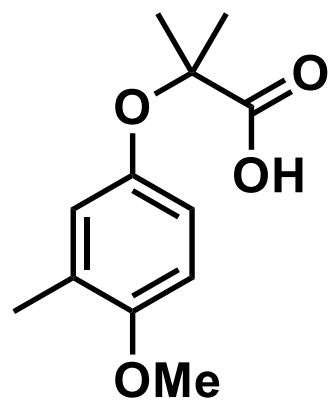

**8j**

75 MHz, CDCl<sub>3</sub>

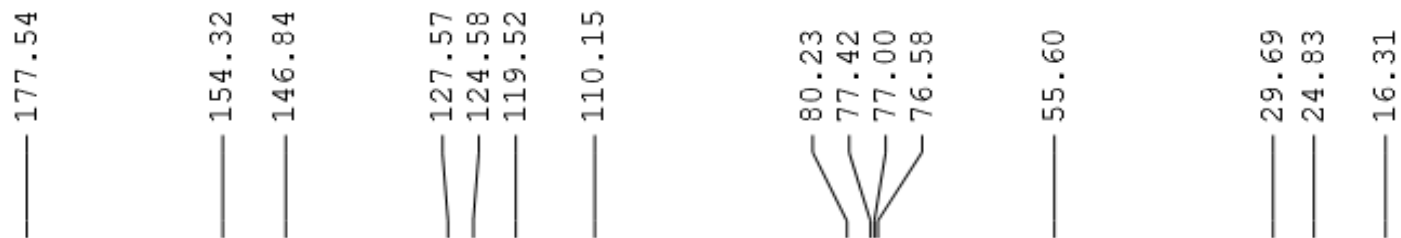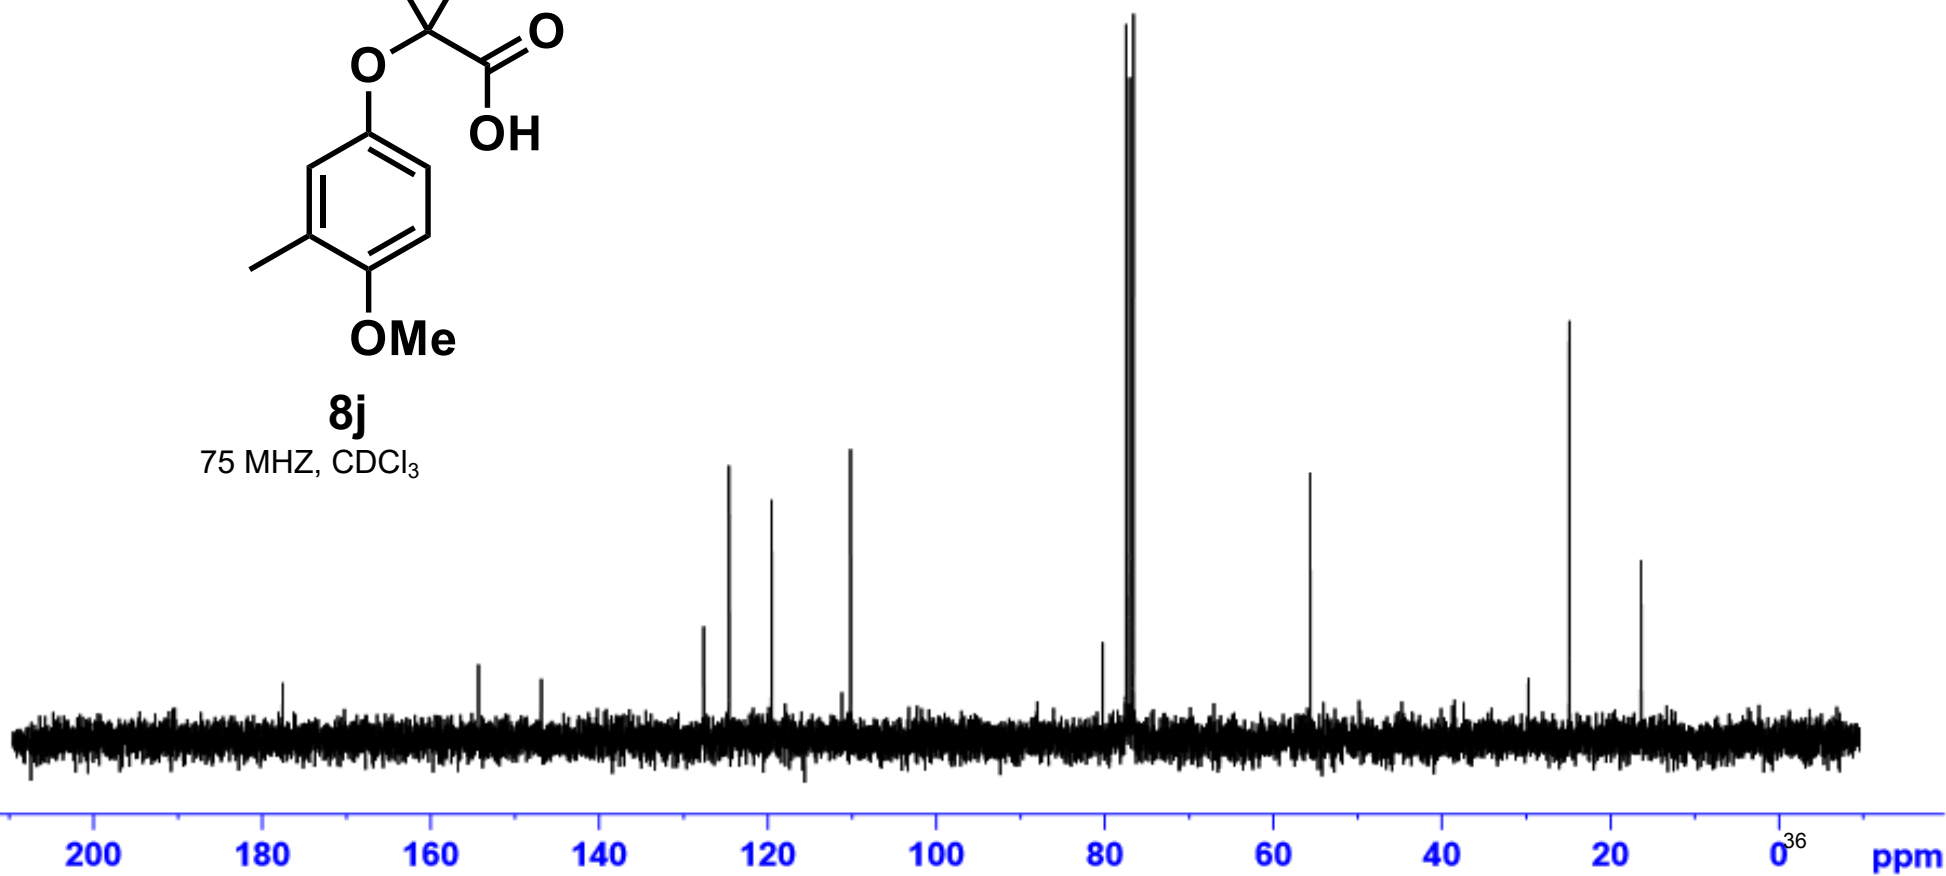

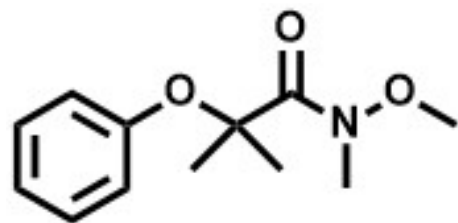

**9a**

300 MHz, CDCl<sub>3</sub>

7.270  
7.251  
7.244  
7.226  
7.223  
7.204  
7.198  
6.973  
6.949  
6.924  
6.879  
6.876  
6.850

3.582  
3.283

1.613

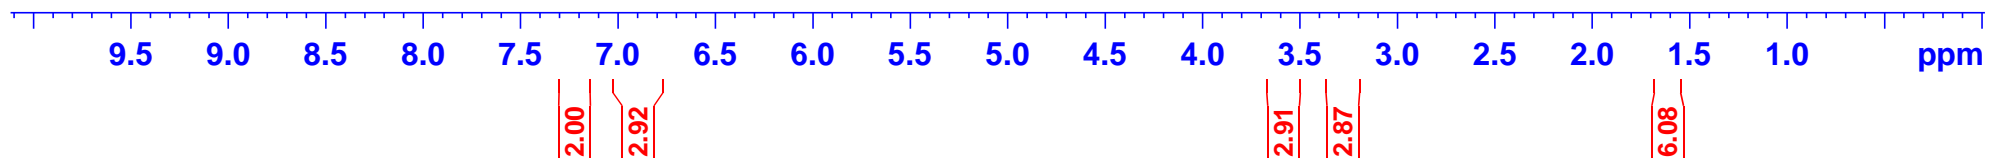

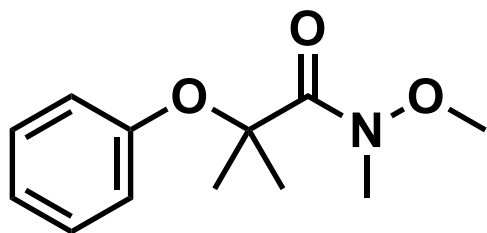

**9a**

75 MHz, CDCl<sub>3</sub>

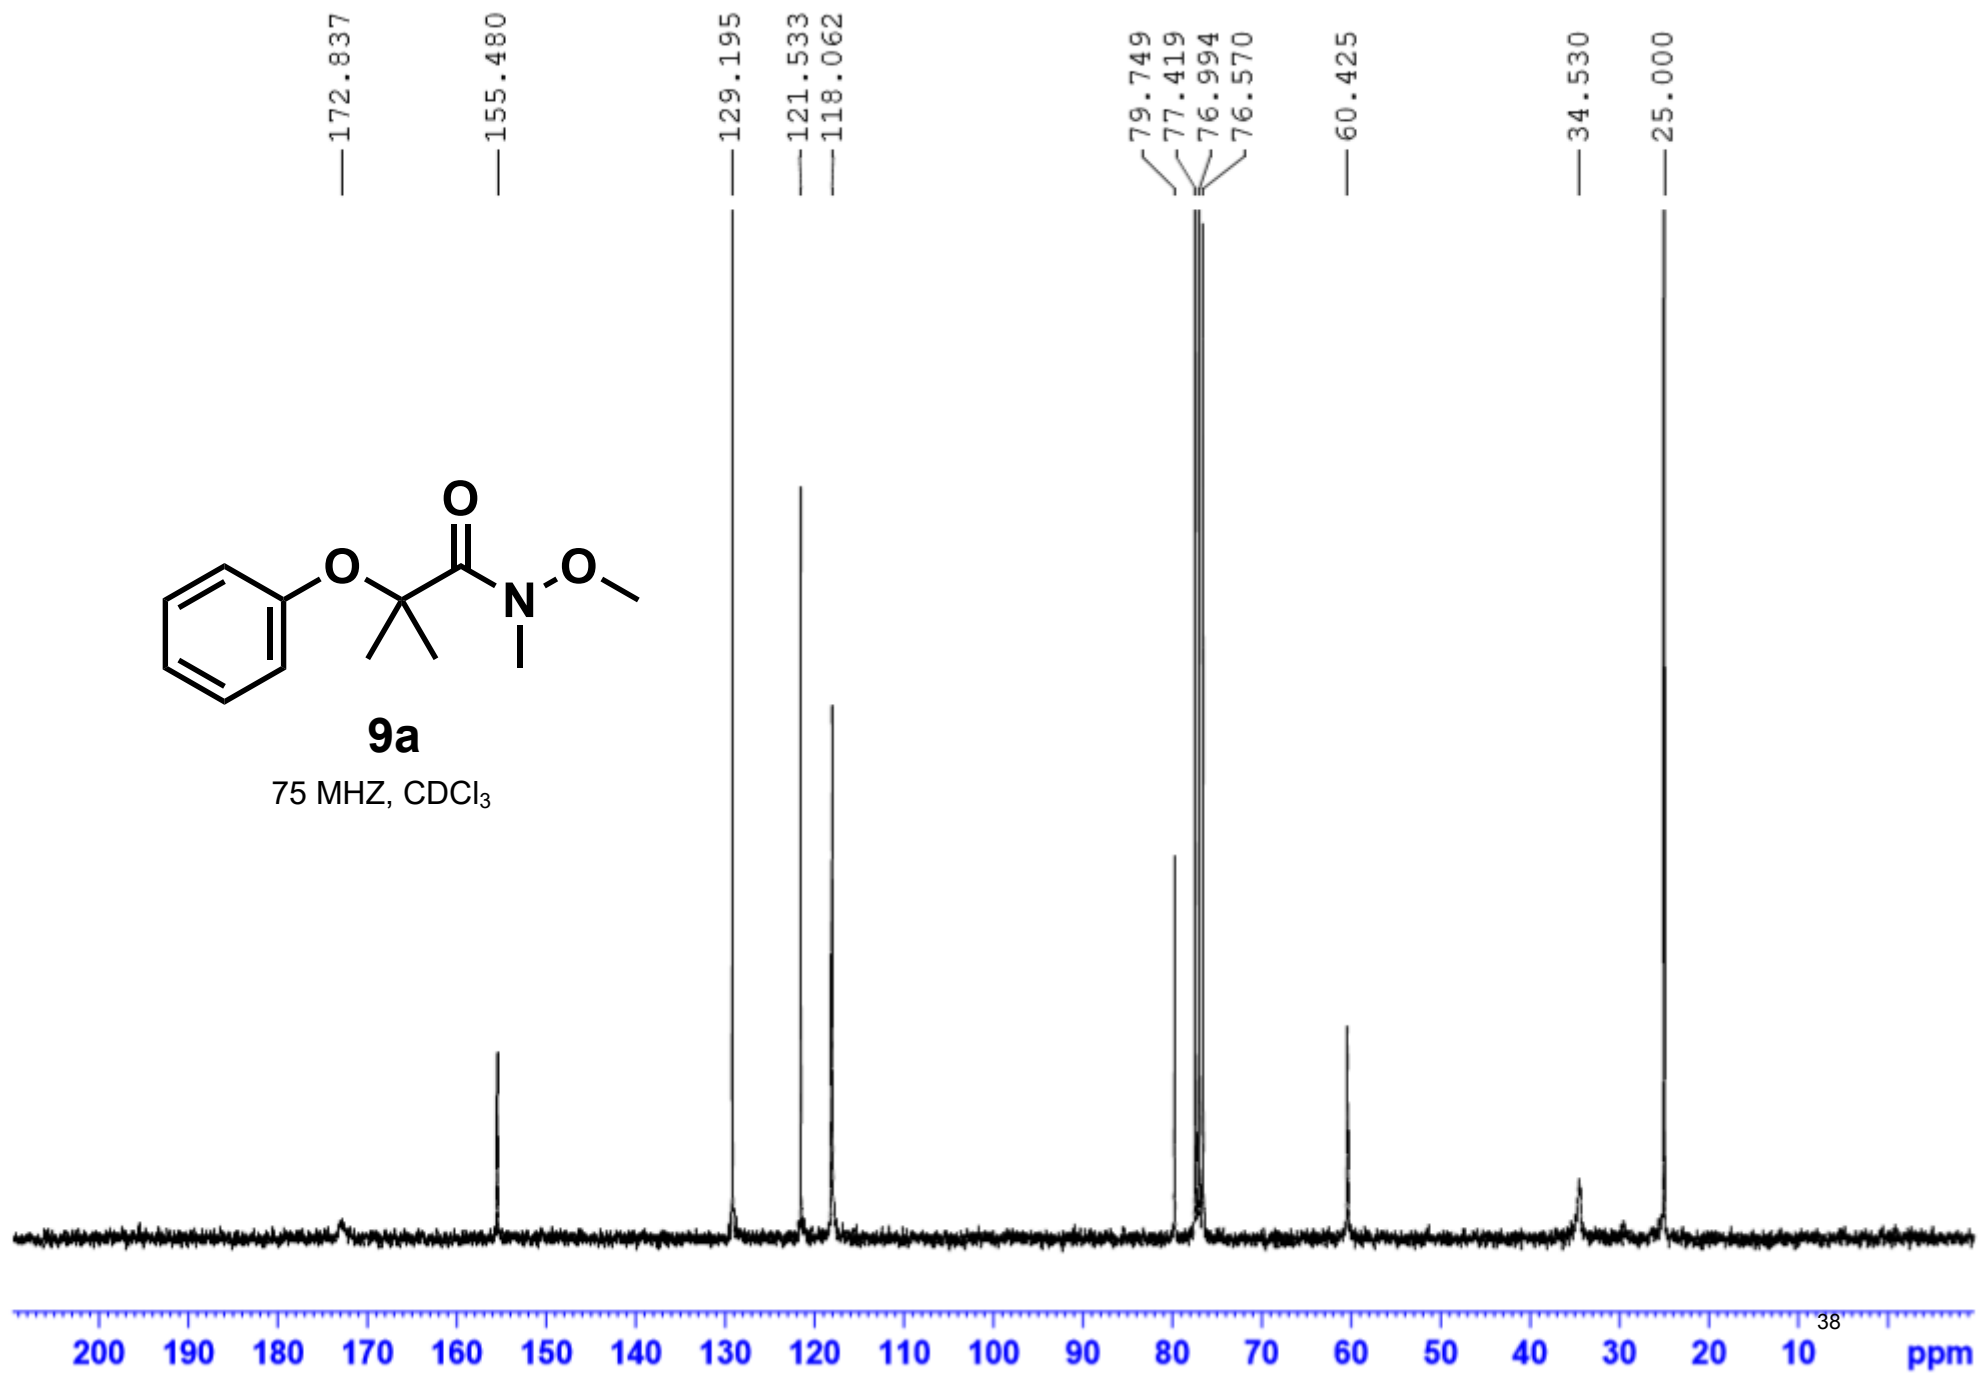

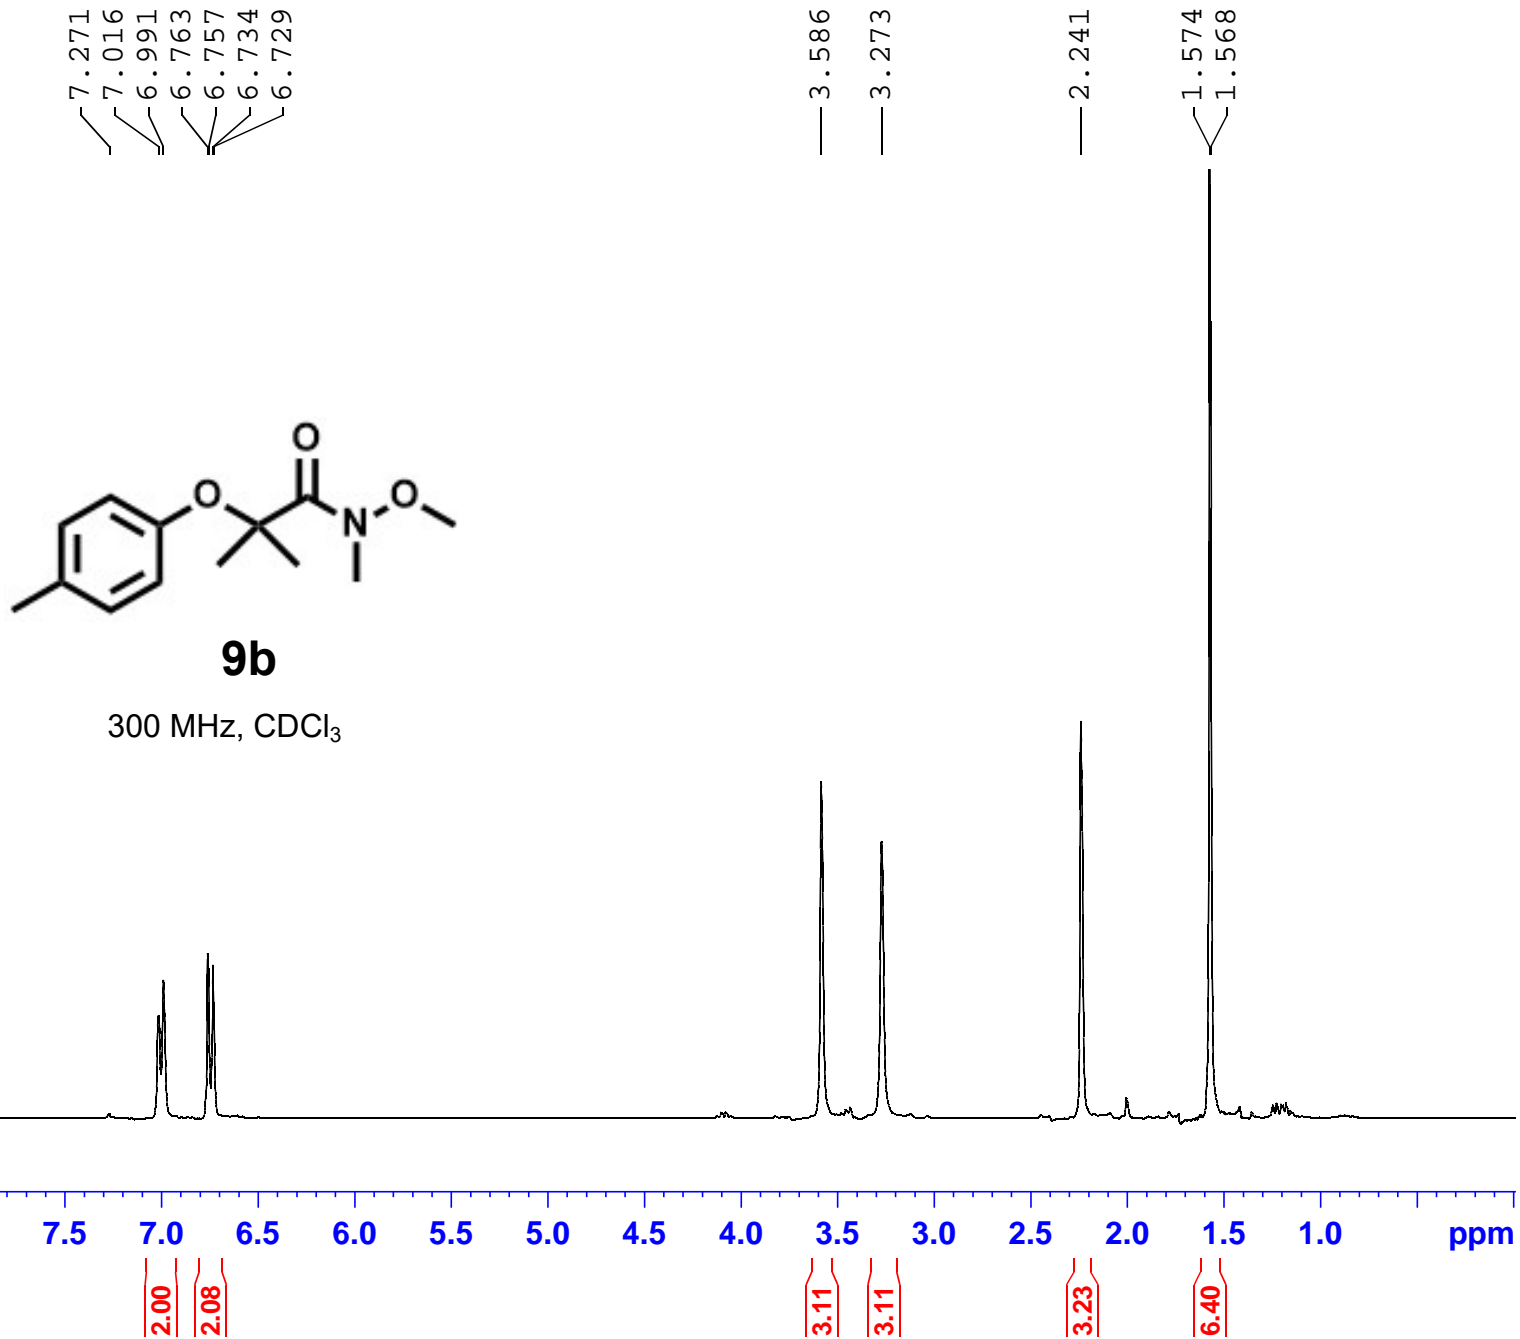

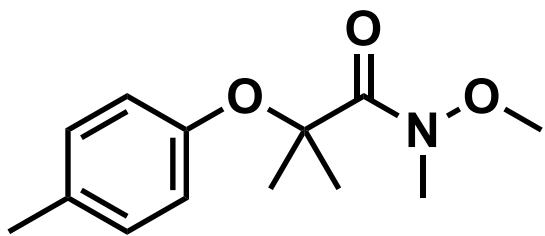

**9b**

75 MHz, CDCl<sub>3</sub>

—172.740

—153.171

<130.874  
<129.646

—118.097

<79.659  
<77.426  
<77.000  
<76.577

—60.383

—34.514

—24.949

—20.304

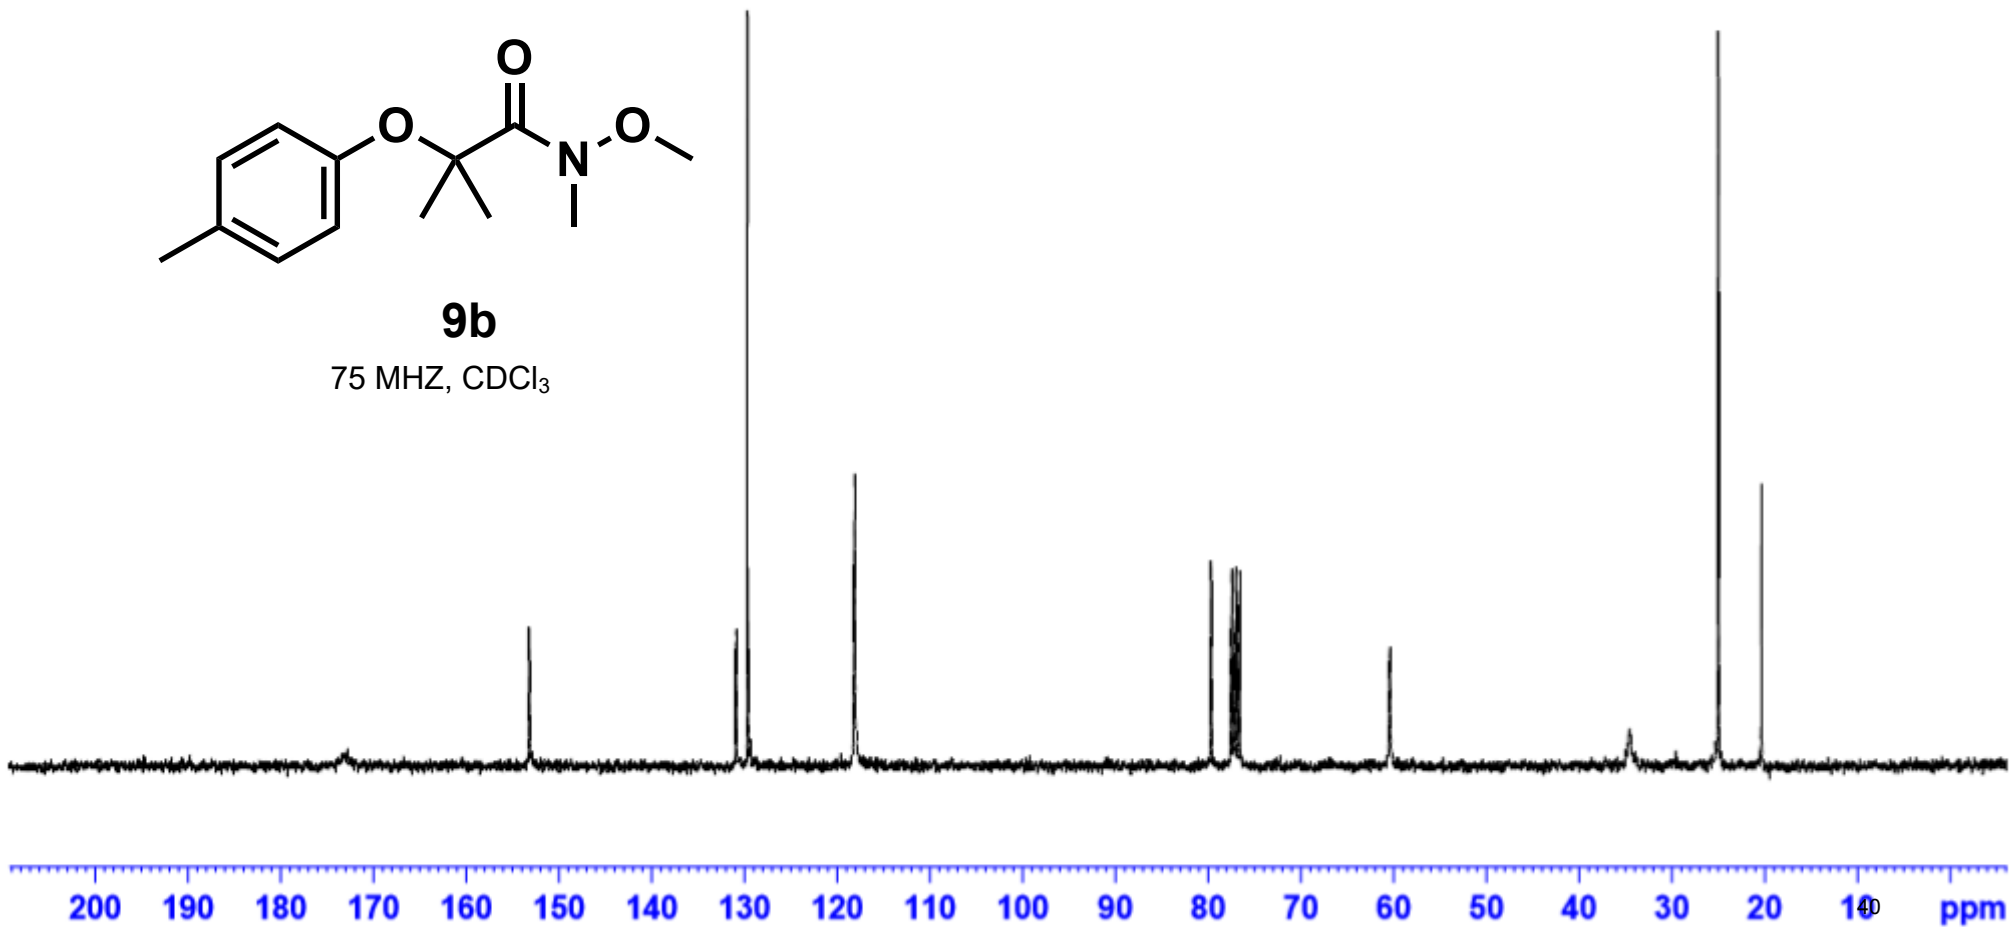



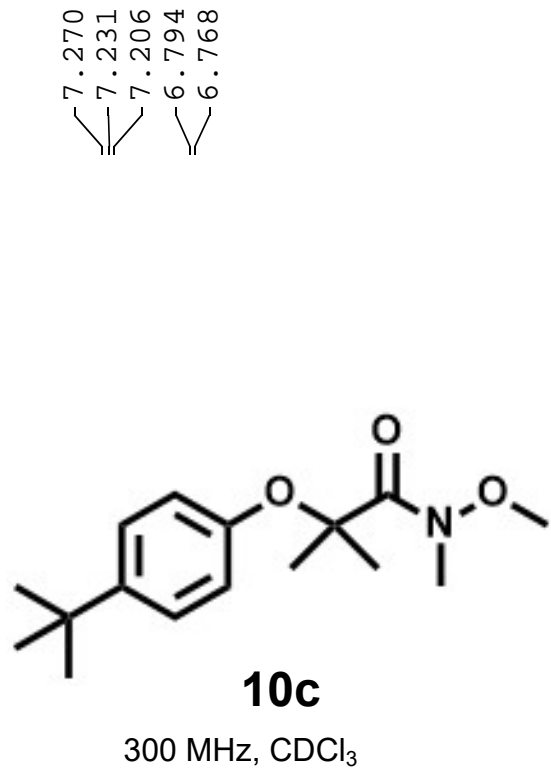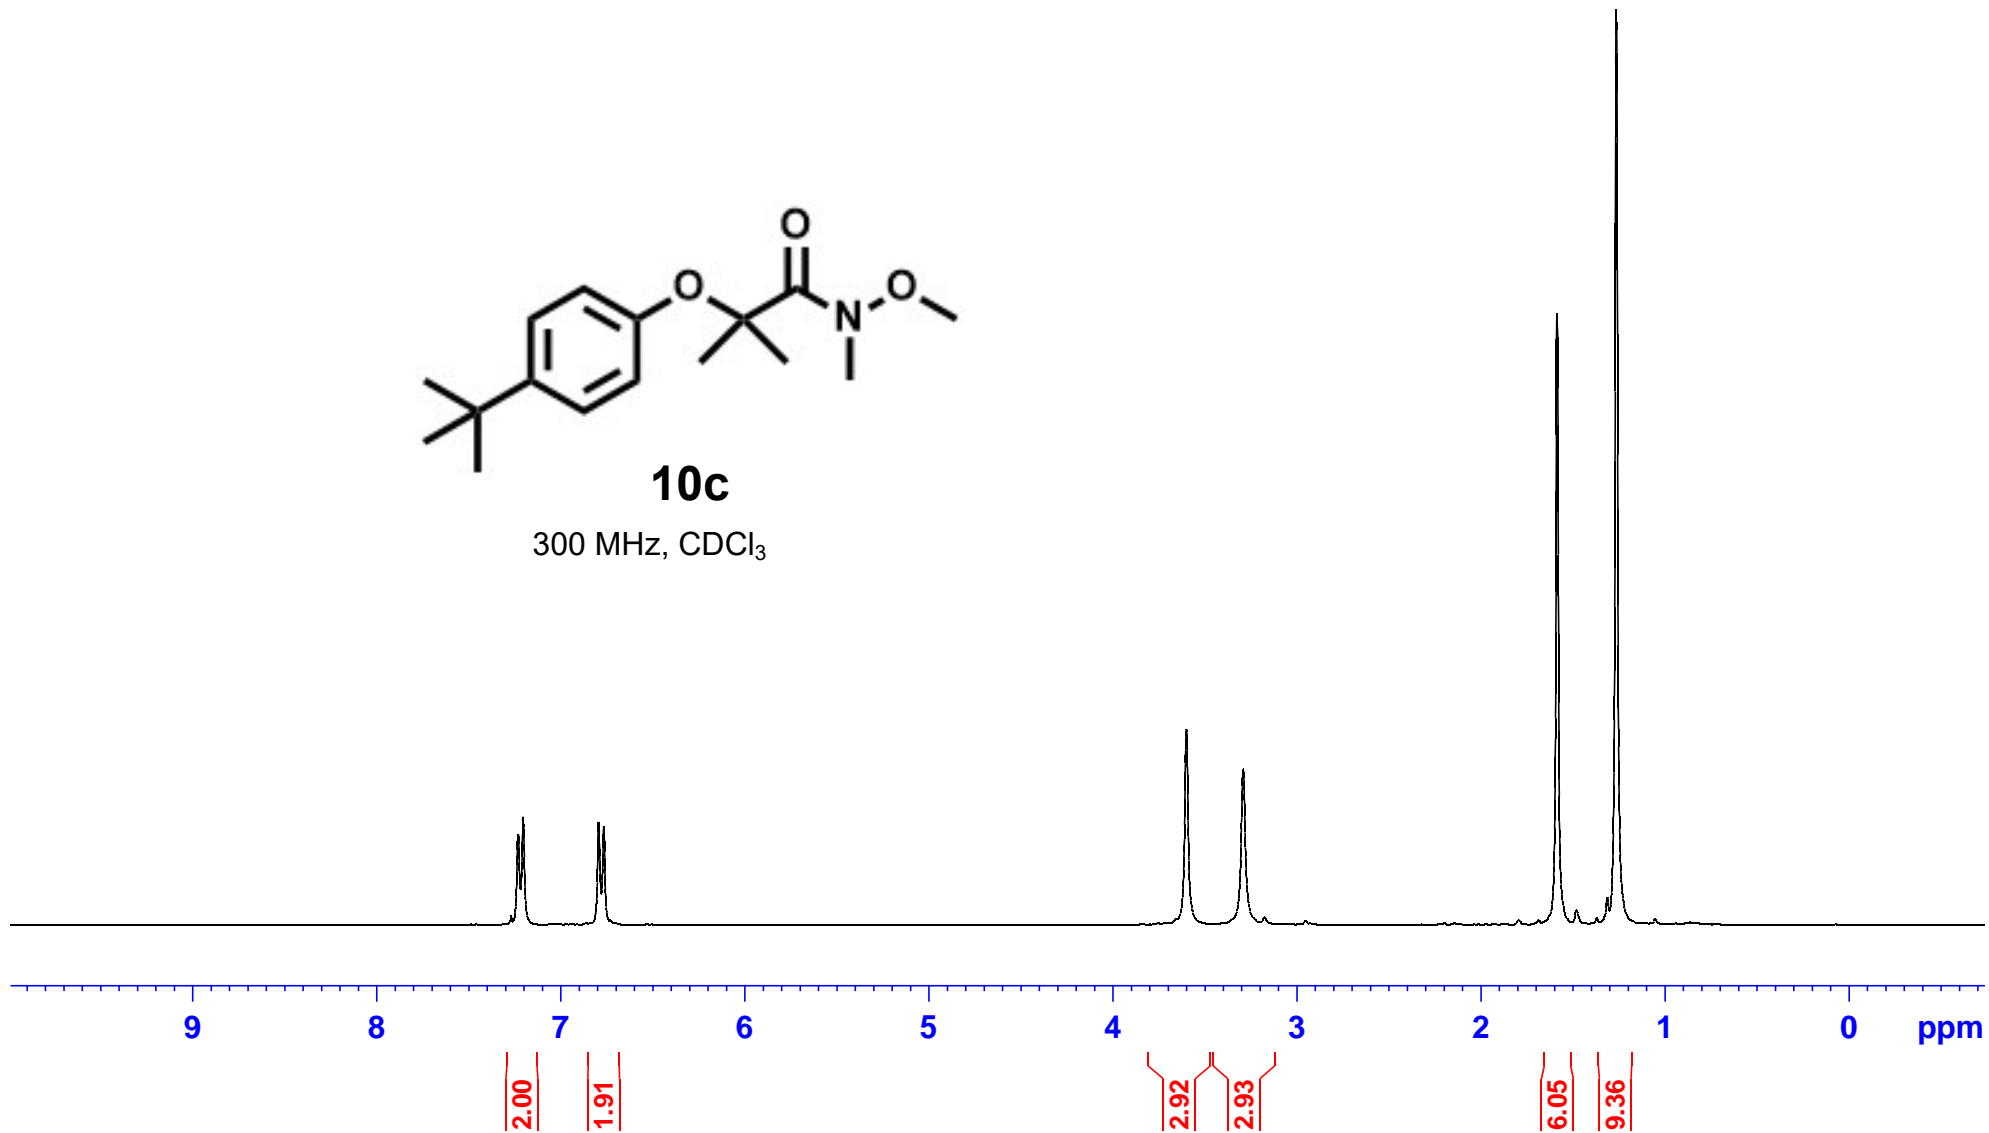

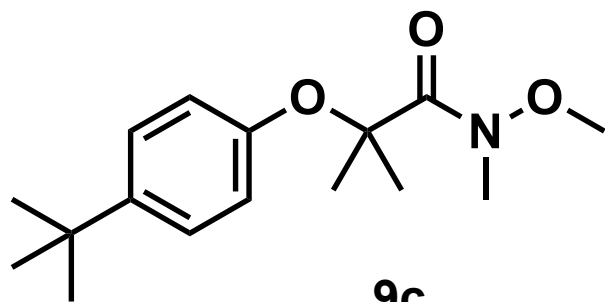

**9c**  
75 MHz, CDCl<sub>3</sub>

—173.476

—153.199

—144.493

—126.088

—117.986

79.917

77.547

77.123

76.699

—60.624

34.772

34.099

31.495

—25.227

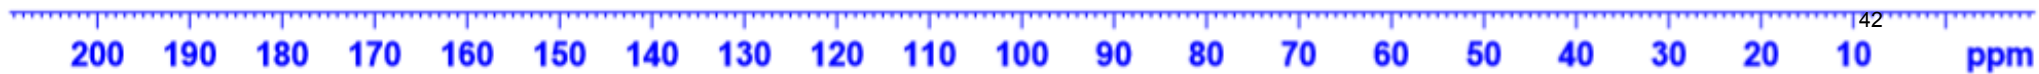

7.270  
6.826  
6.816  
6.804  
6.795  
6.786  
6.783  
6.775  
6.765  
6.753  
6.745

3.735  
3.635  
3.304

1.548

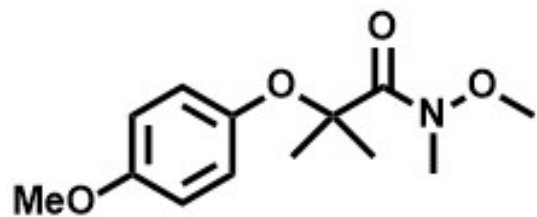

**9d**

300 MHz, CDCl<sub>3</sub>

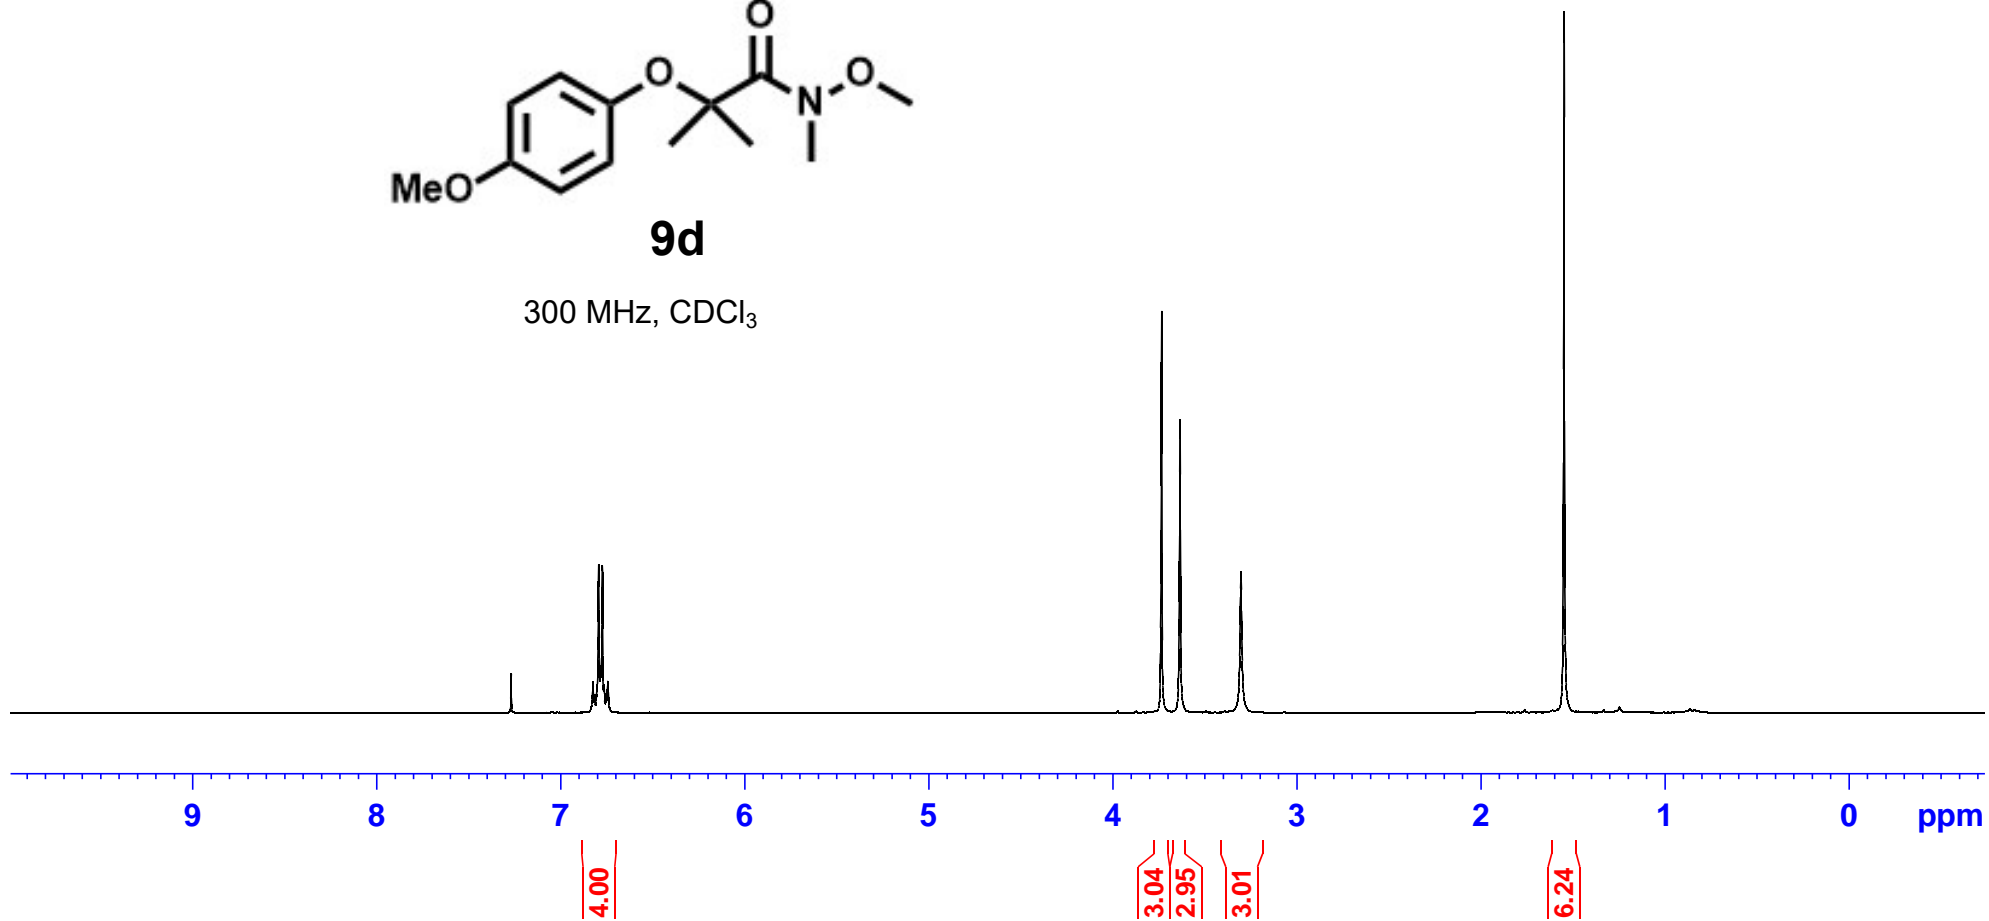

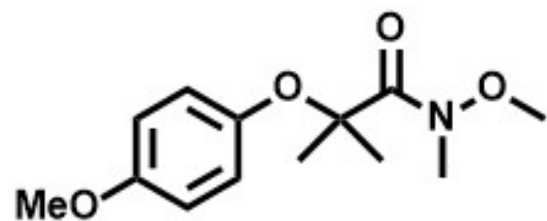

**9d**

125 MHz, CDCl<sub>3</sub>

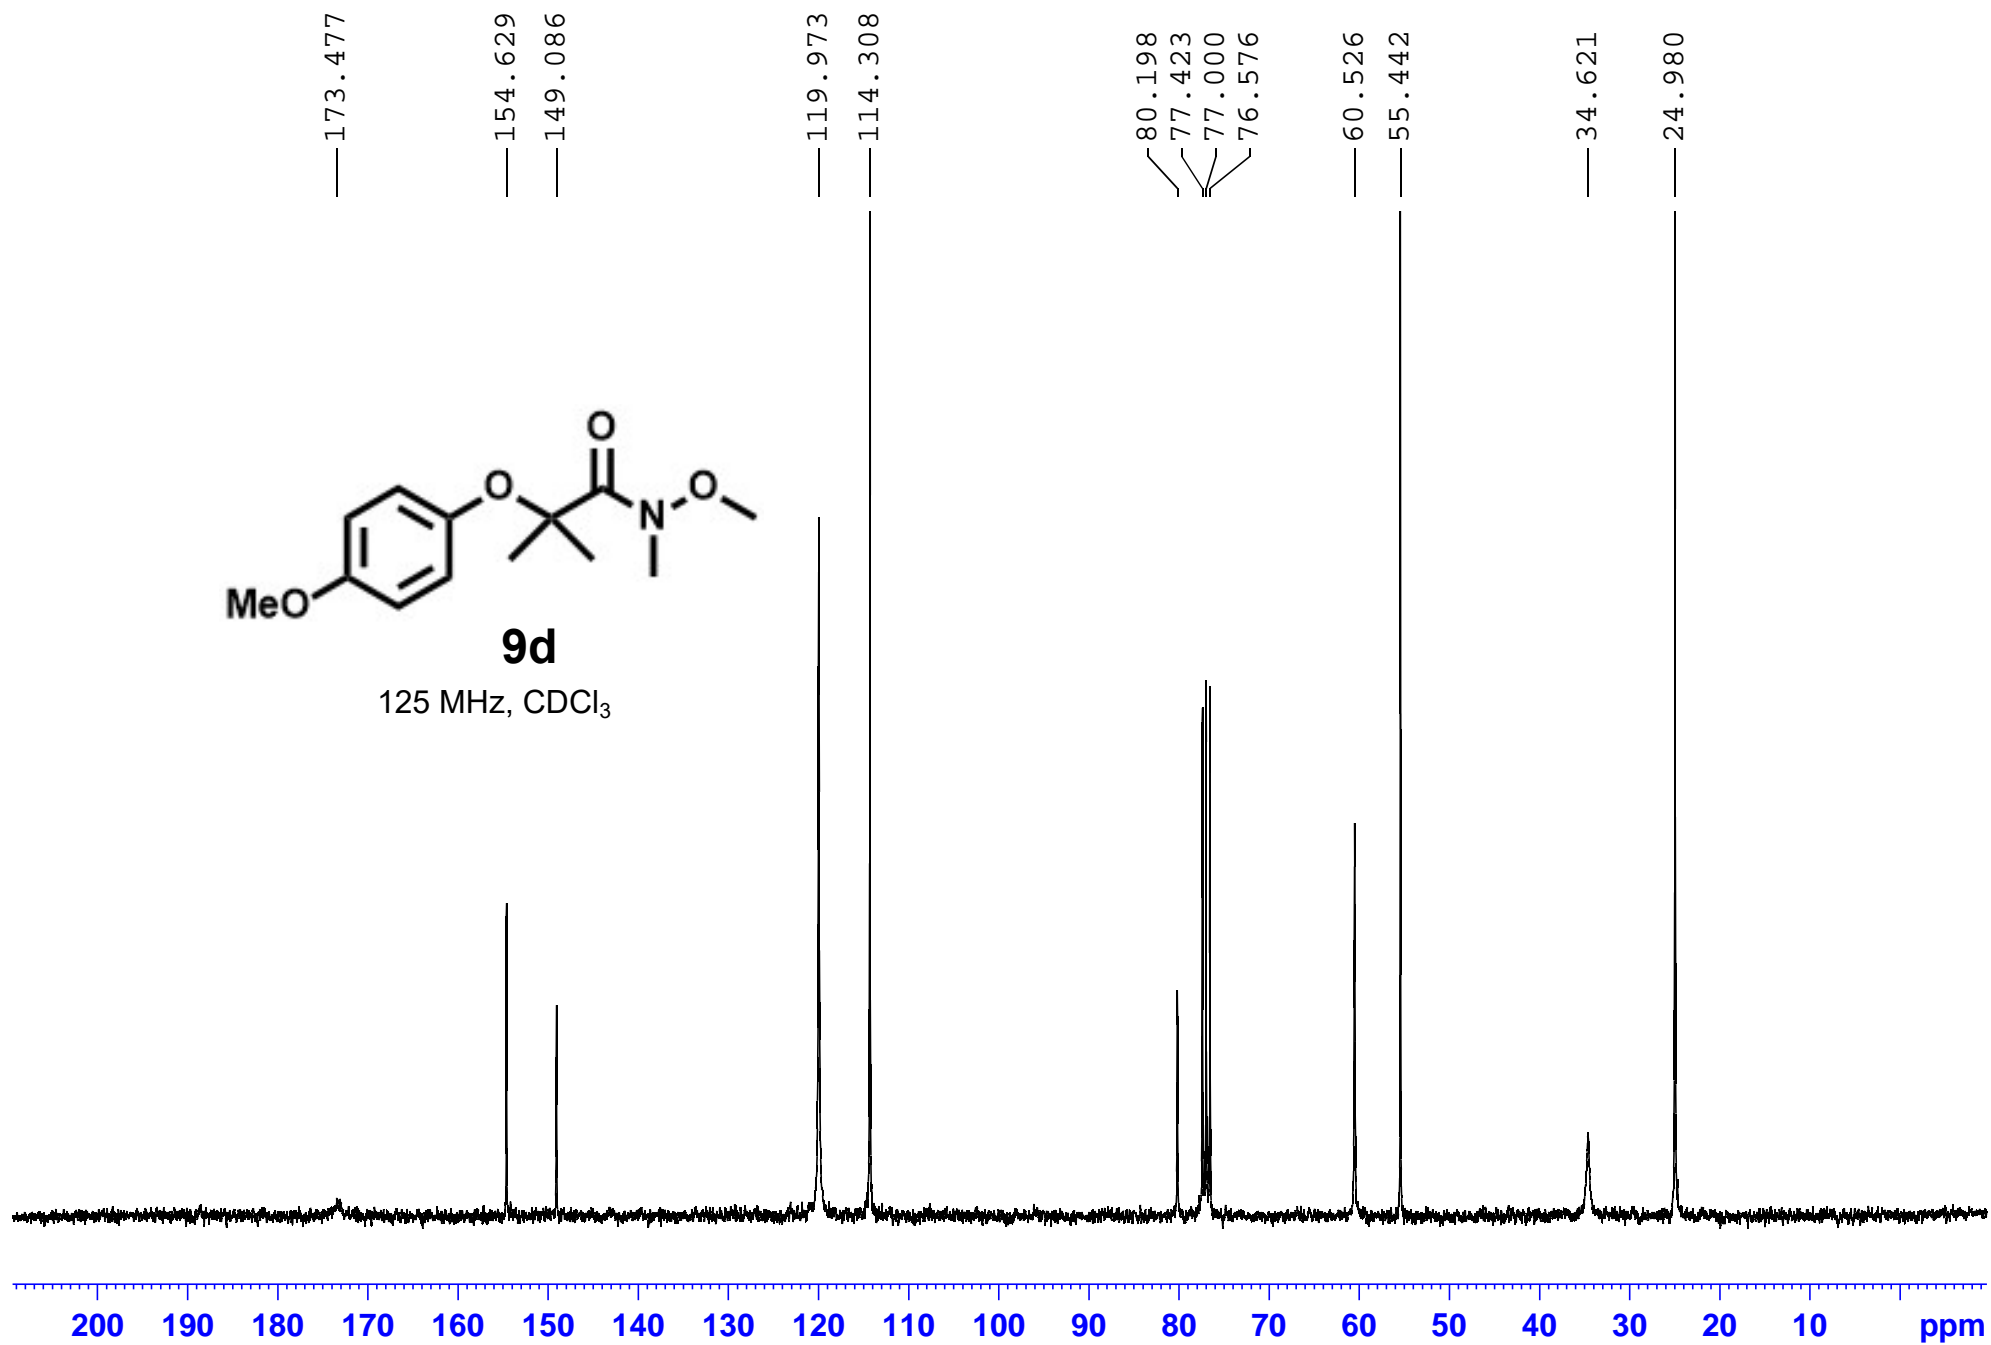

7.270  
7.134  
7.108  
7.082  
6.792  
6.767  
6.766  
6.697  
6.695  
6.682  
6.674  
6.655  
6.647

— 3.605  
— 3.300  
— 2.291  
— 1.612

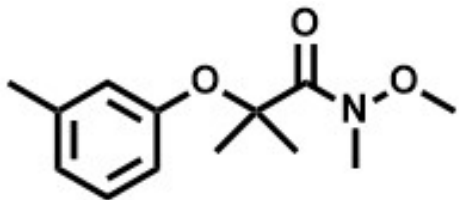

**9f**

500 MHz, CDCl<sub>3</sub>

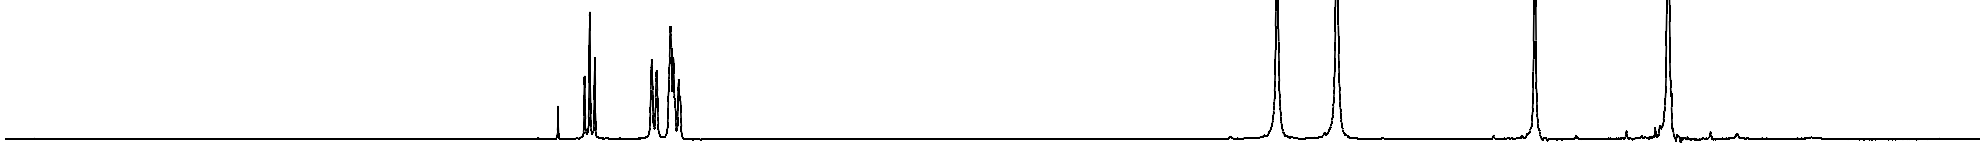

9.5 9.0 8.5 8.0 7.5 7.0 6.5 6.0 5.5 5.0 4.5 4.0 3.5 3.0 2.5 2.0 1.5 1.0 ppm

1.00  
1.02  
1.91  
3.00  
2.93  
2.99  
6.08

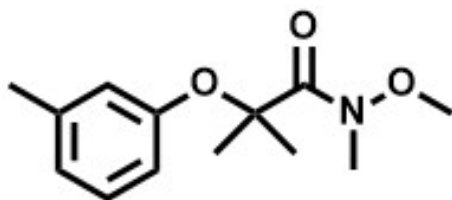

**9f**

125 MHz, CDCl<sub>3</sub>

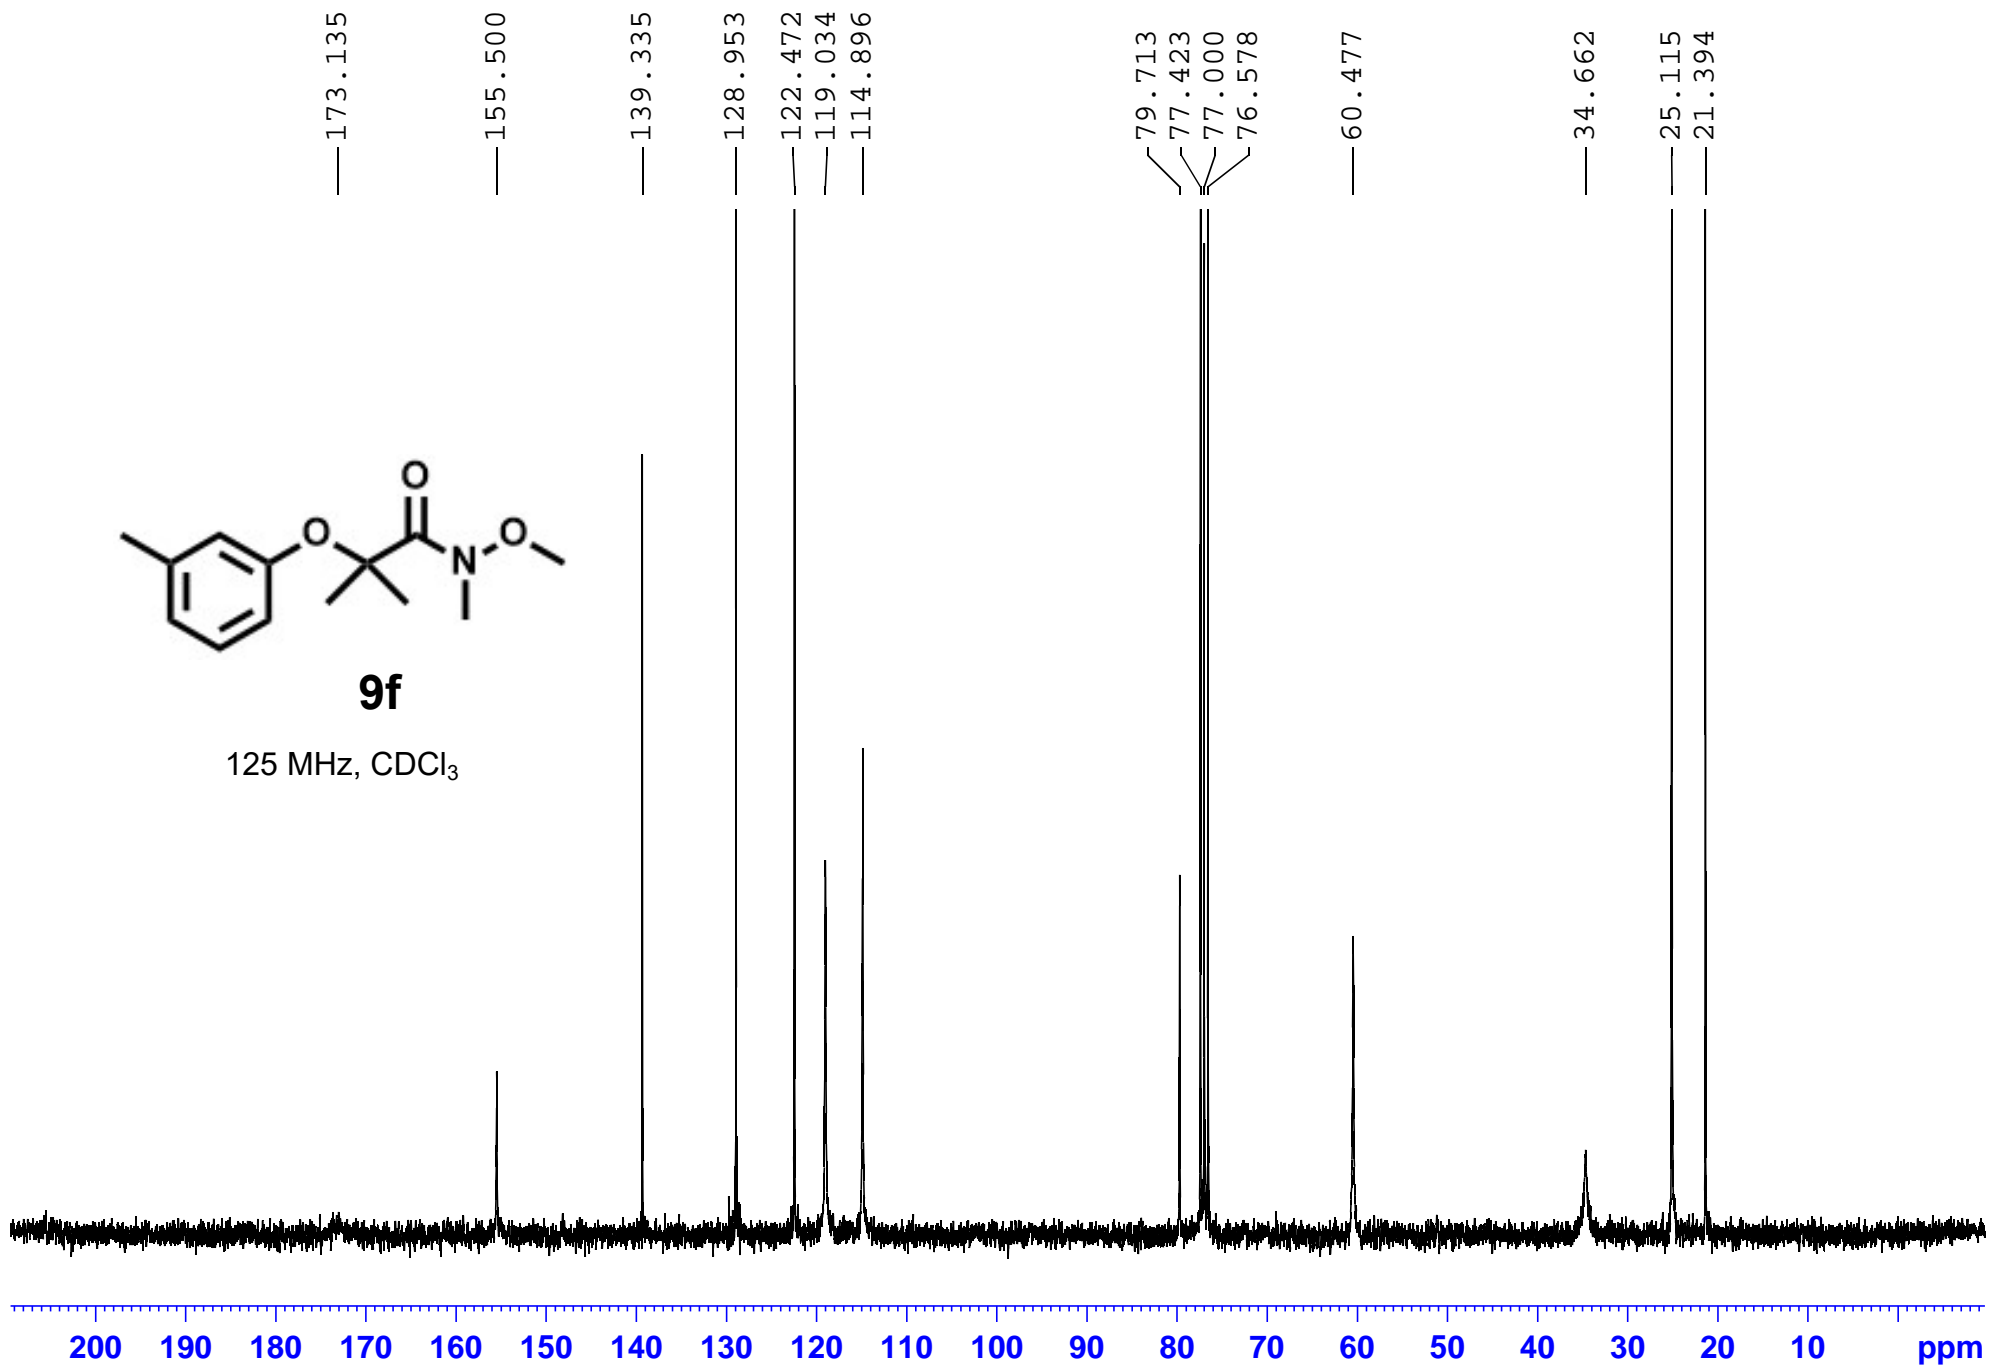

7.270  
7.145  
7.143  
7.121  
7.119  
7.067  
7.063  
7.042  
7.016  
7.012  
6.872  
6.848  
6.823  
6.760  
6.733

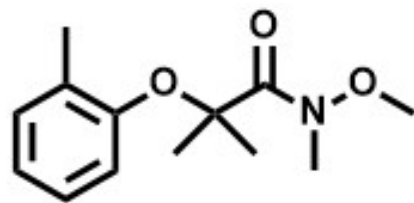

**9g**

300 MHz, CDCl<sub>3</sub>

— 3.558

— 3.279

— 2.222

— 1.626

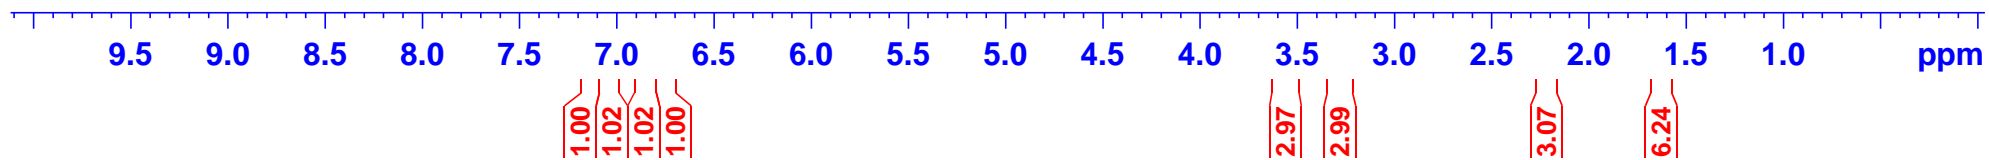

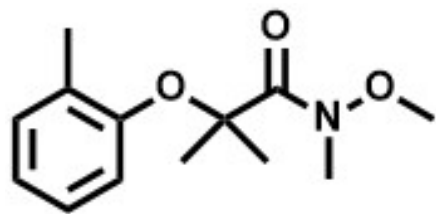

**9g**

75 MHz, CDCl<sub>3</sub>

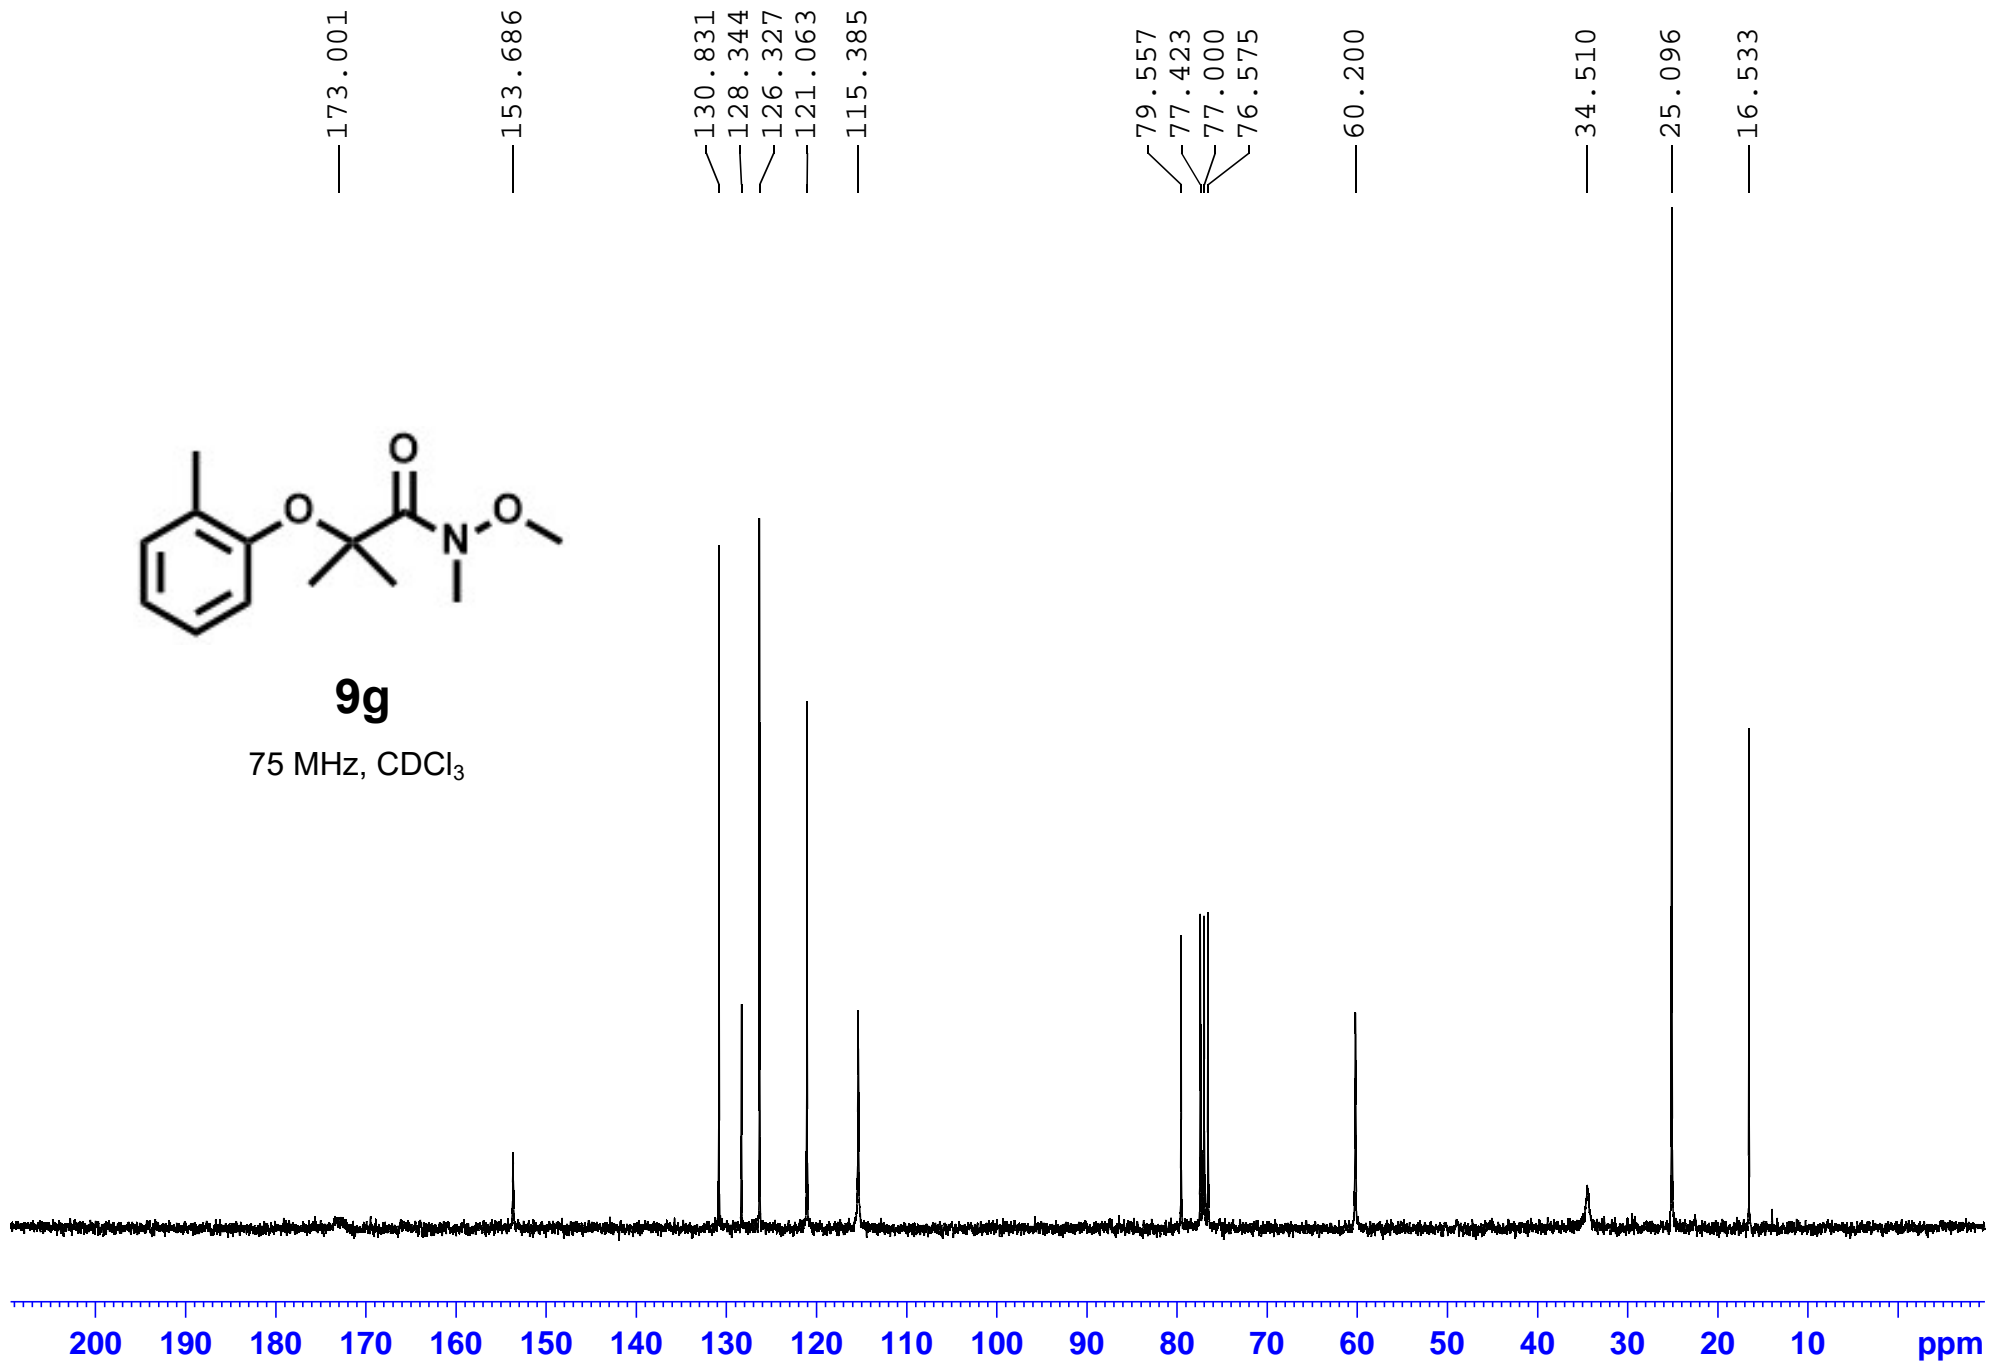



7.268  
7.230  
7.224  
7.205  
7.199  
7.072  
7.066  
7.045  
7.041  
7.020  
7.014  
6.948  
6.945  
6.923  
6.920  
6.898  
6.895  
6.749  
6.746  
6.722  
6.719

3.576  
3.370  
3.347  
3.323  
3.305  
3.279

1.635  
1.245  
1.222

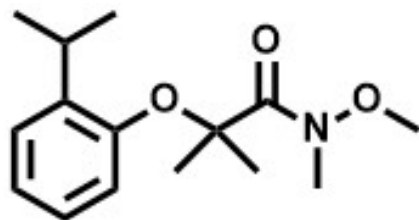

**9h**

300 MHz, CDCl<sub>3</sub>

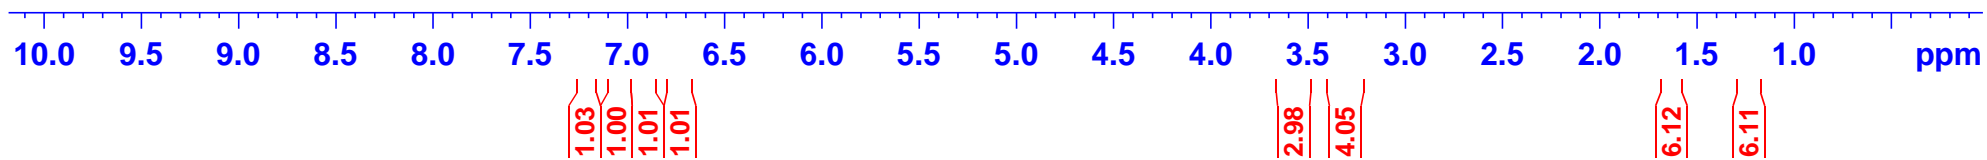

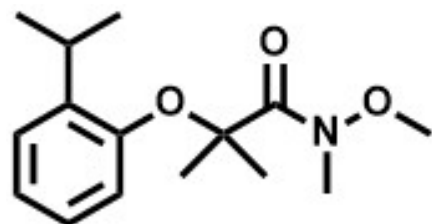

**9h**

75 MHz, CDCl<sub>3</sub>

— 173.432

— 152.653

— 138.584

— 126.540

— 126.084

— 121.389

— 115.726

— 79.469

— 77.425

— 77.000

— 76.577

— 60.439

— 34.513

— 27.172

— 25.075

— 22.649

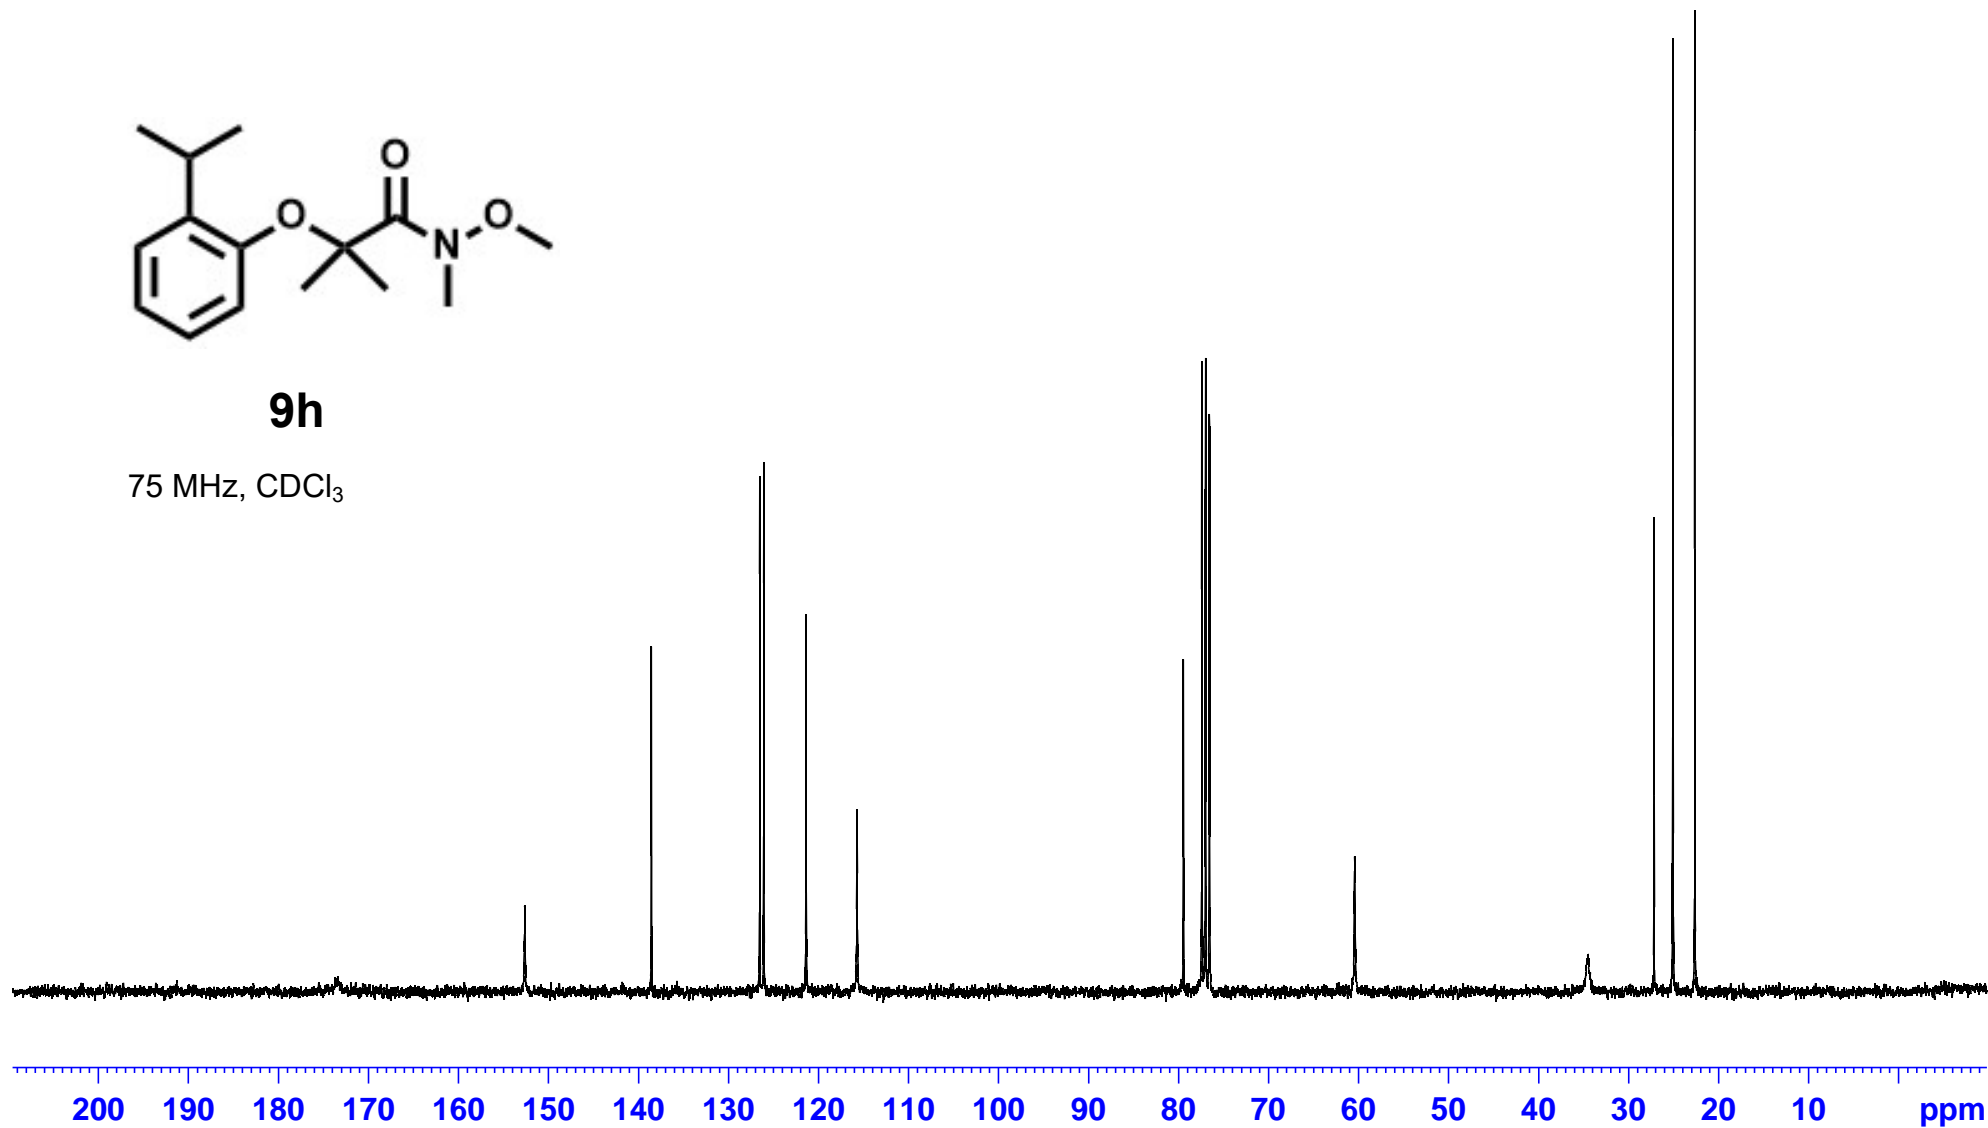

bs0.0607 2, p-Cl-m-Me Weinreb amide, 6/7/21

7.270  
7.184  
7.155  
6.762  
6.752  
6.656  
6.646  
6.627  
6.617

3.598

3.286

2.303

1.601

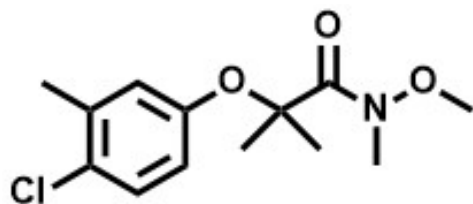

**9i**

300 MHz, CDCl<sub>3</sub>

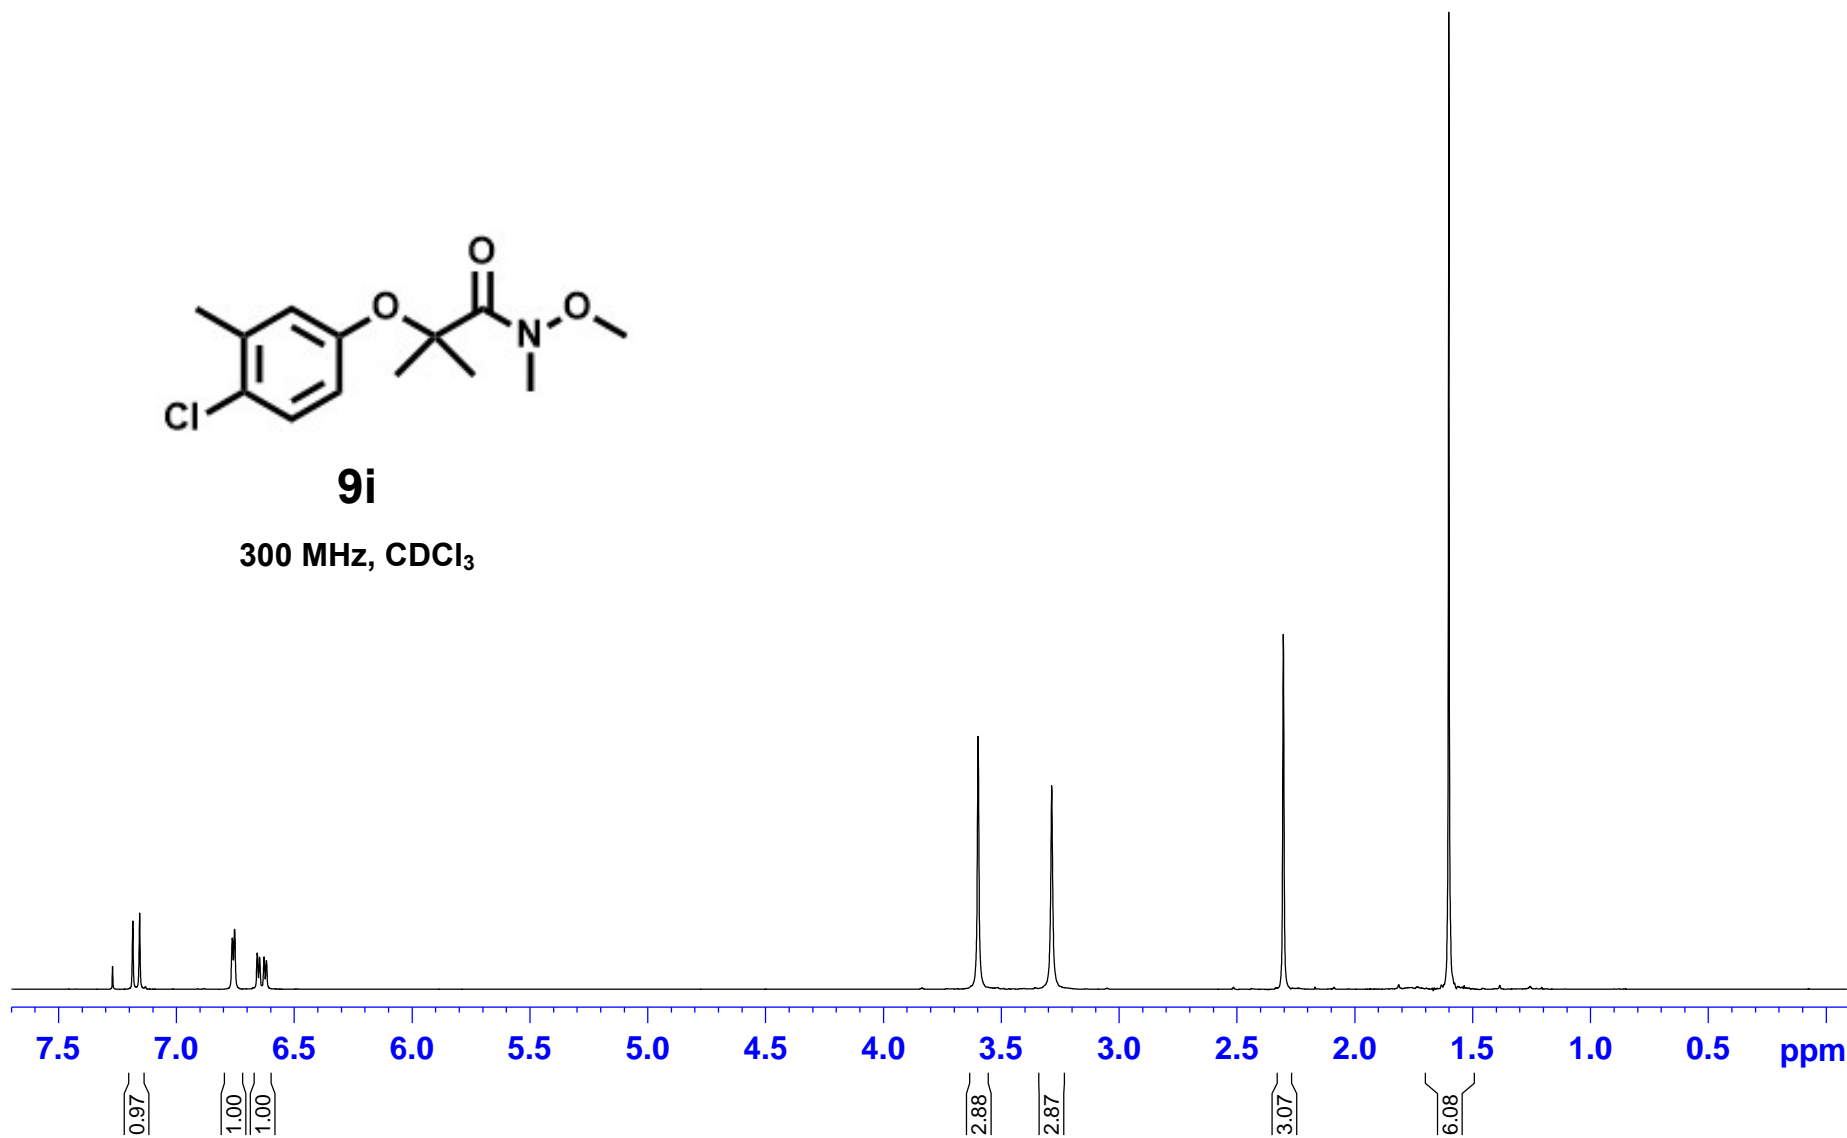

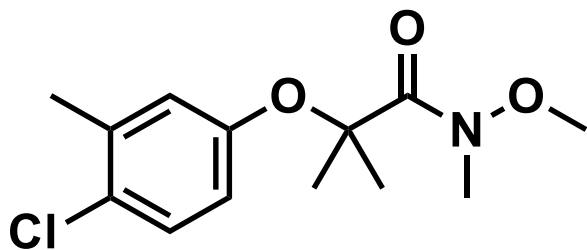

**9i**

75 MHz, CDCl<sub>3</sub>

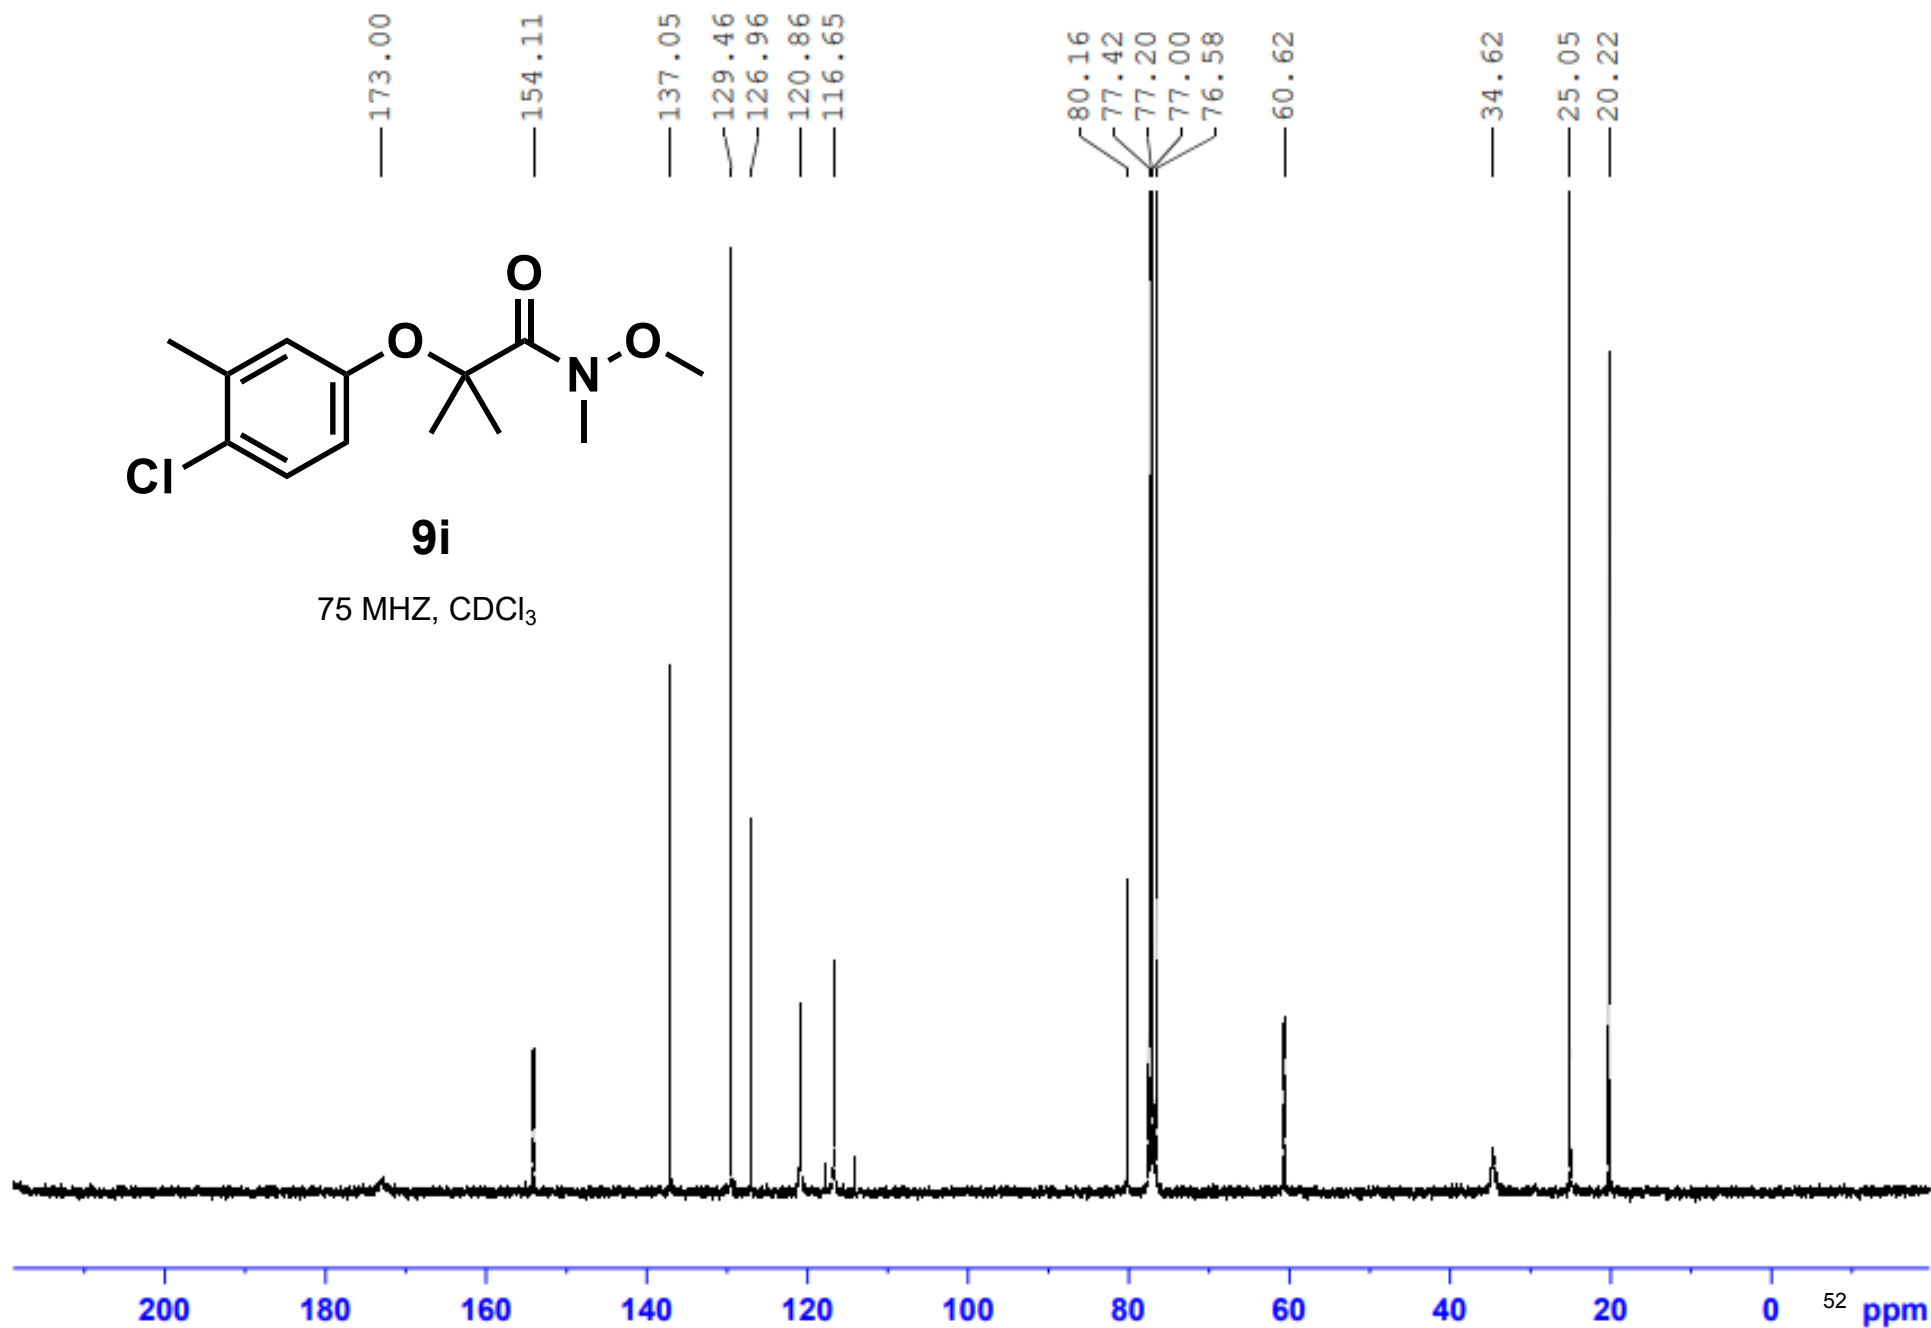

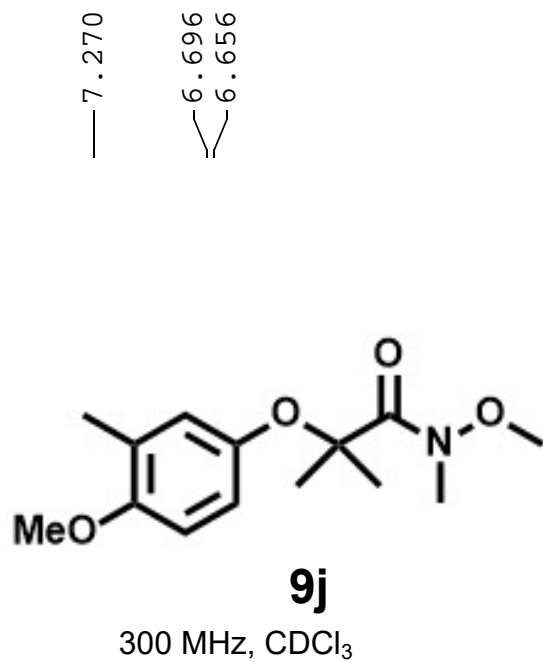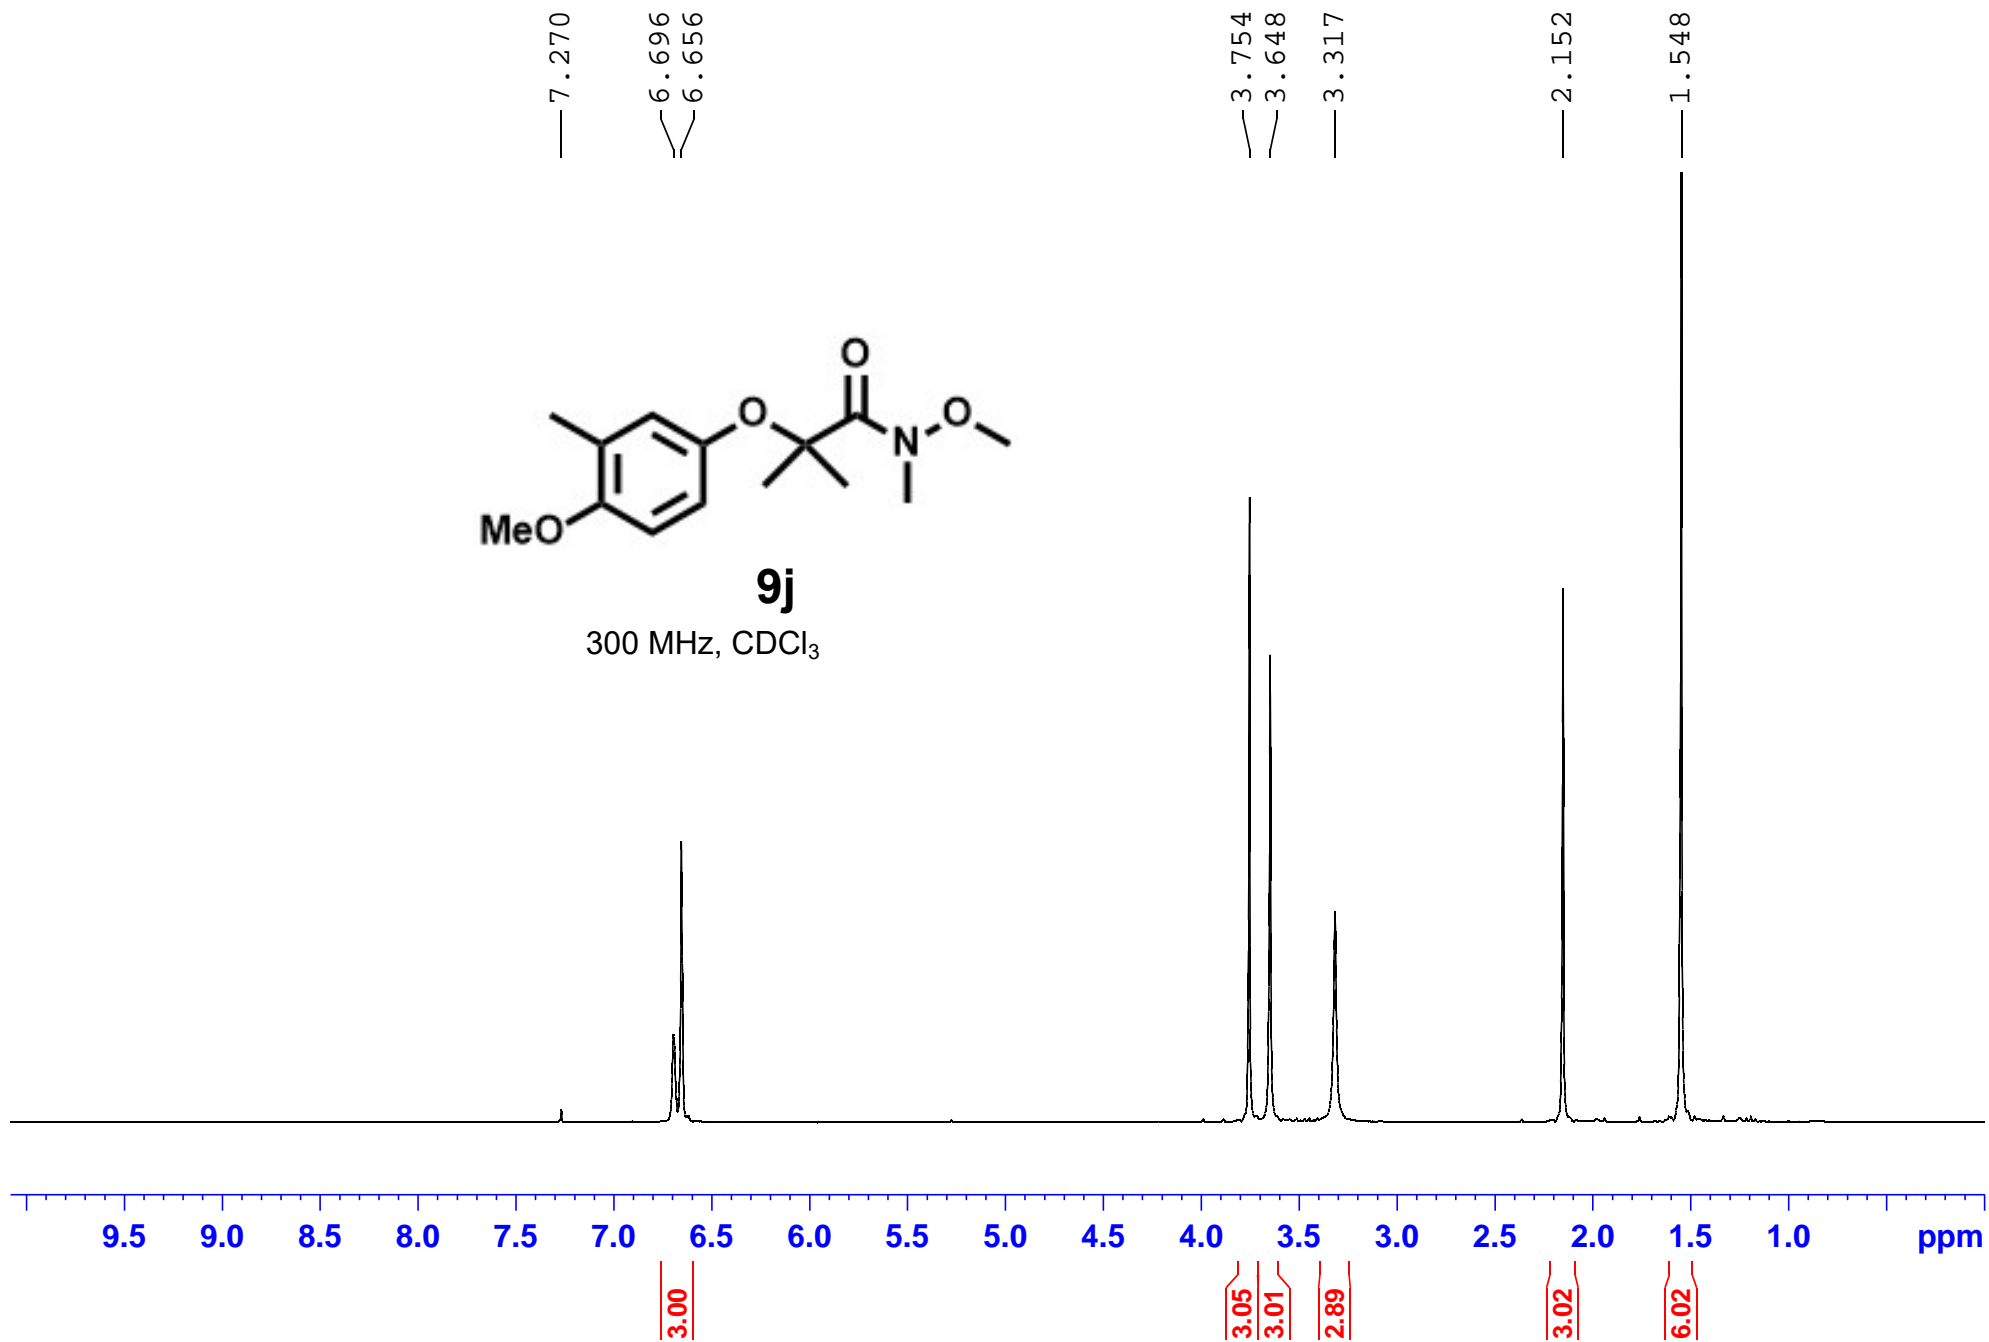

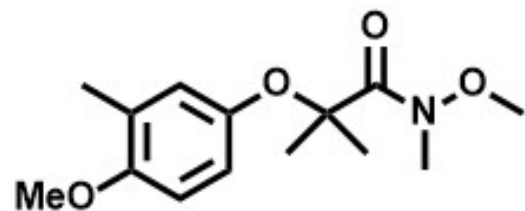

**9j**

75 MHz, CDCl<sub>3</sub>

—173.129

—152.911

—148.616

—127.504

—121.983

—116.300

—110.281

80.016

77.424

77.000

76.577

—60.470

—55.527

—34.718

—25.023

—16.208

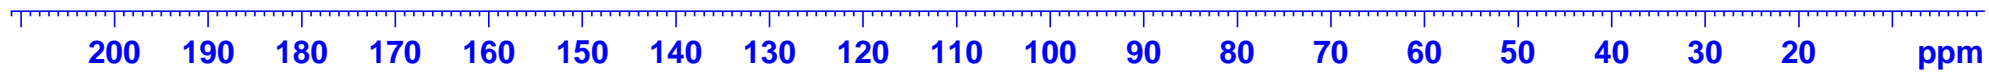

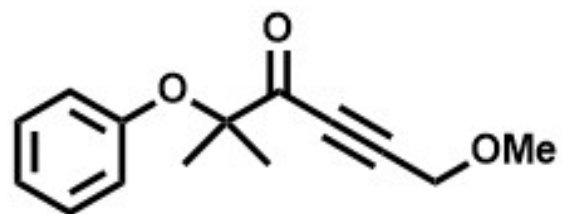

**10a**

300 MHz, CDCl<sub>3</sub>

7.301  
7.276  
7.249  
7.063  
7.038  
7.014  
6.916  
6.890

4.273

3.340

1.582

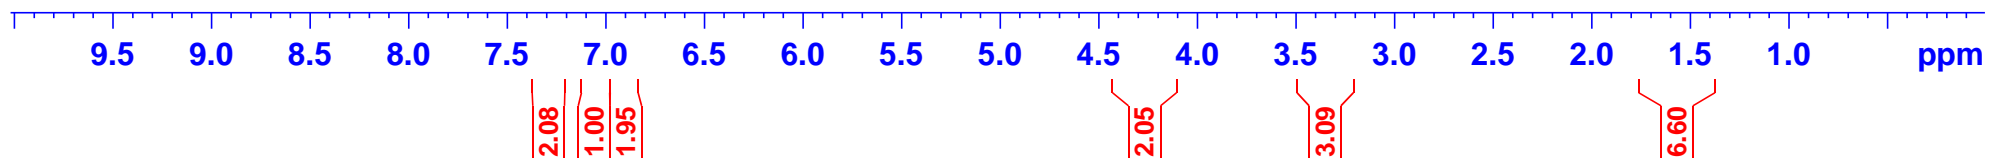

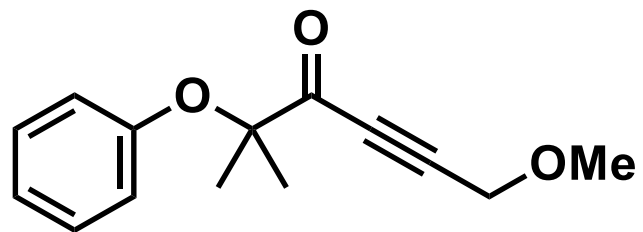

**10a**

75 MHz, CDCl<sub>3</sub>

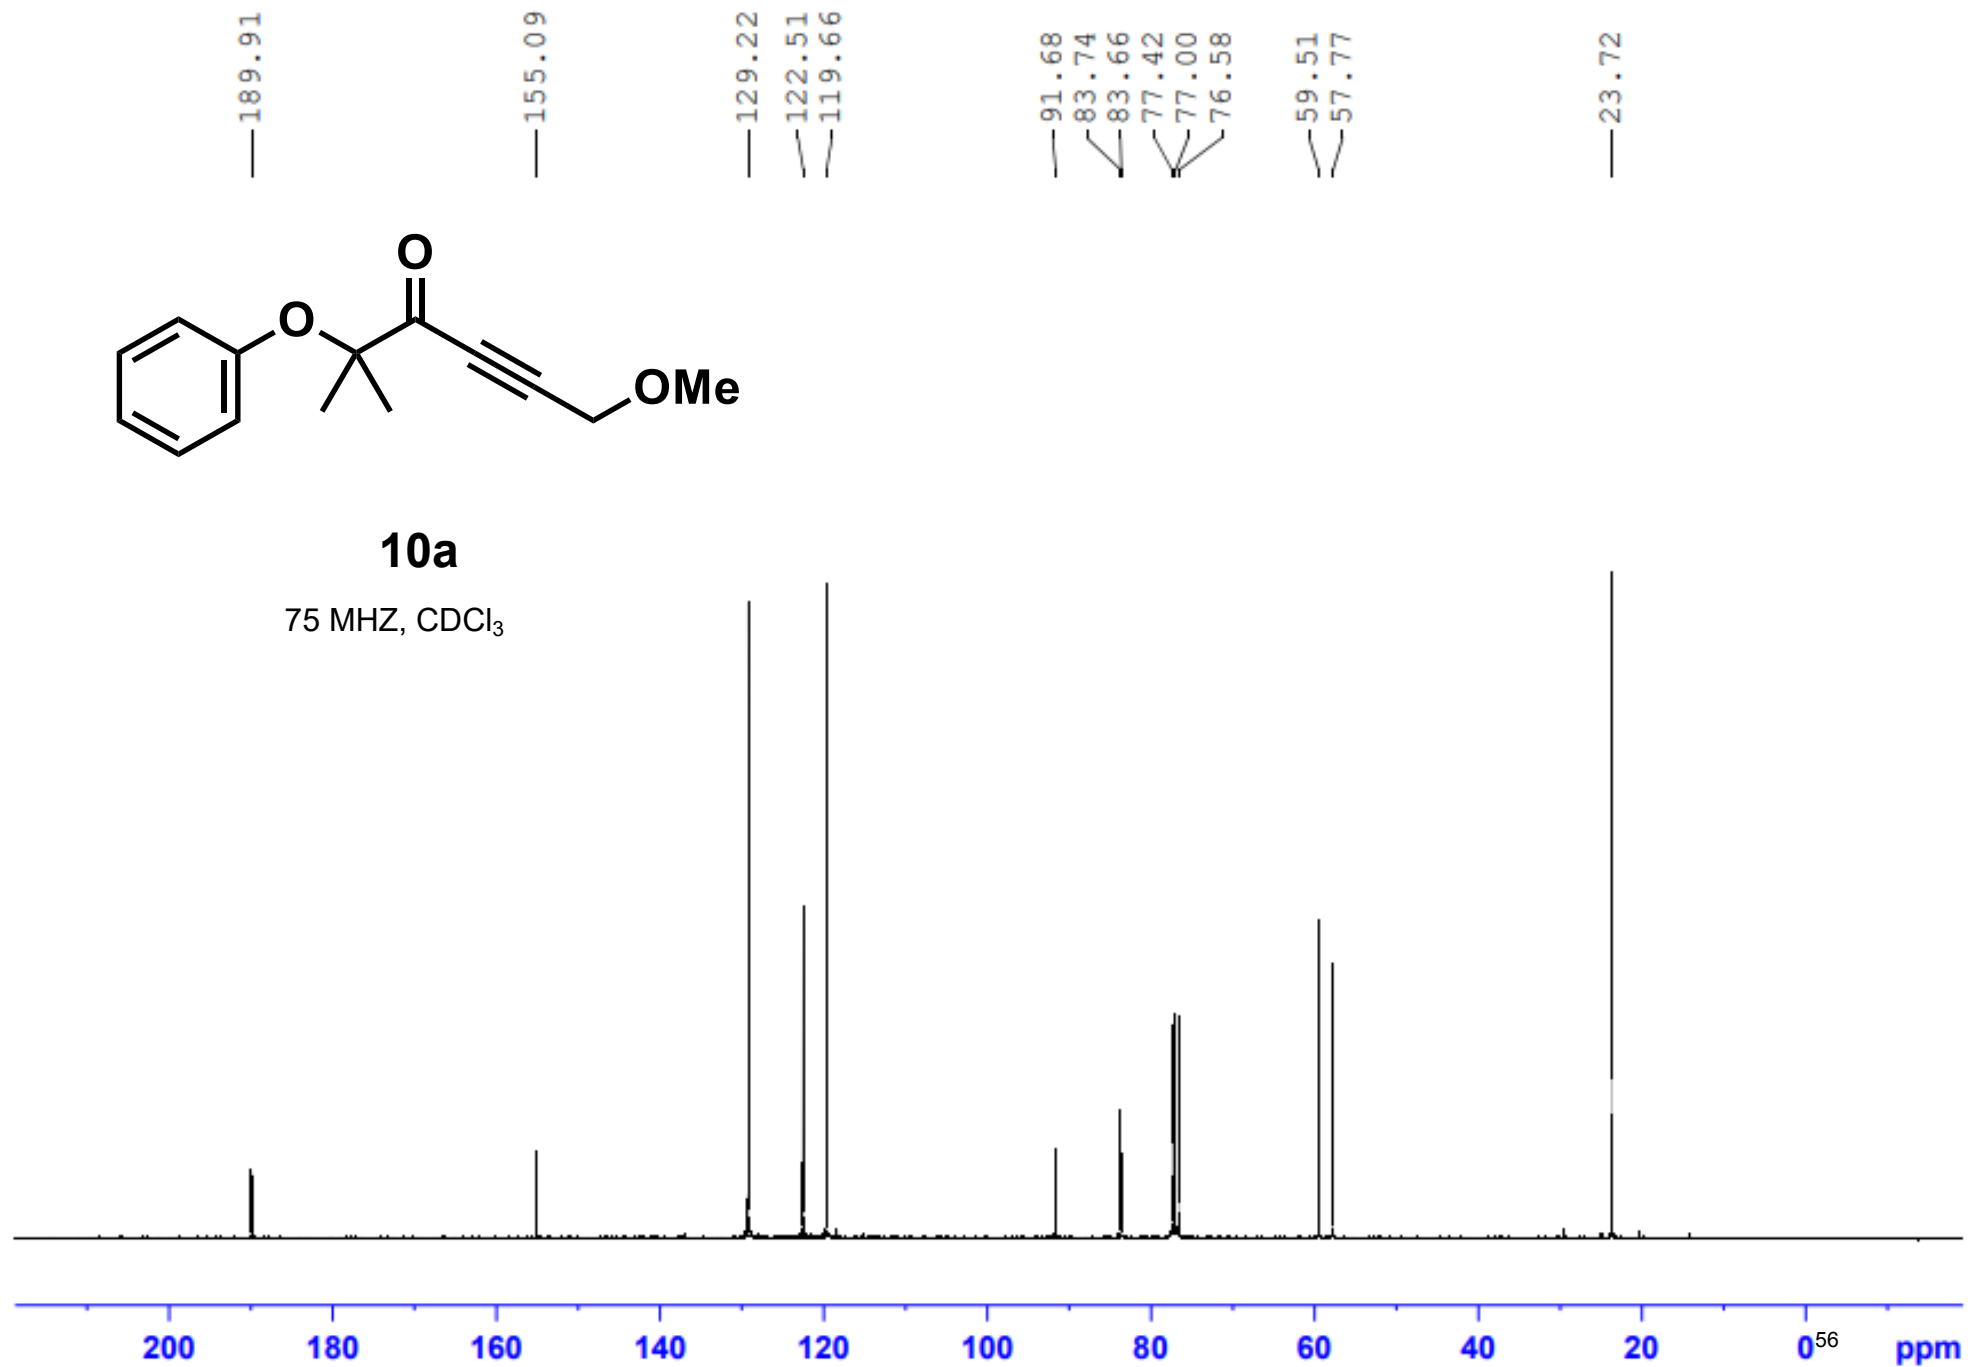



7.361  
7.355  
7.336  
7.330  
7.320  
7.293  
7.267  
7.071  
7.047  
7.022  
6.955  
6.952  
6.930  
6.926  
6.923

4.709  
4.670  
4.414  
4.376  
4.356  
4.333

1.637  
1.631  
1.501  
1.479

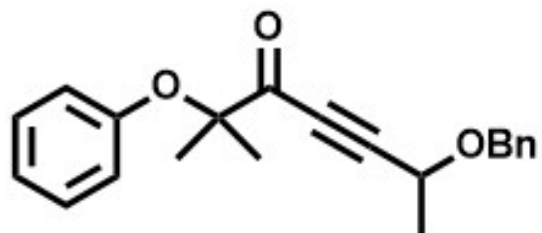

**10aa**

300 MHz, CDCl<sub>3</sub>

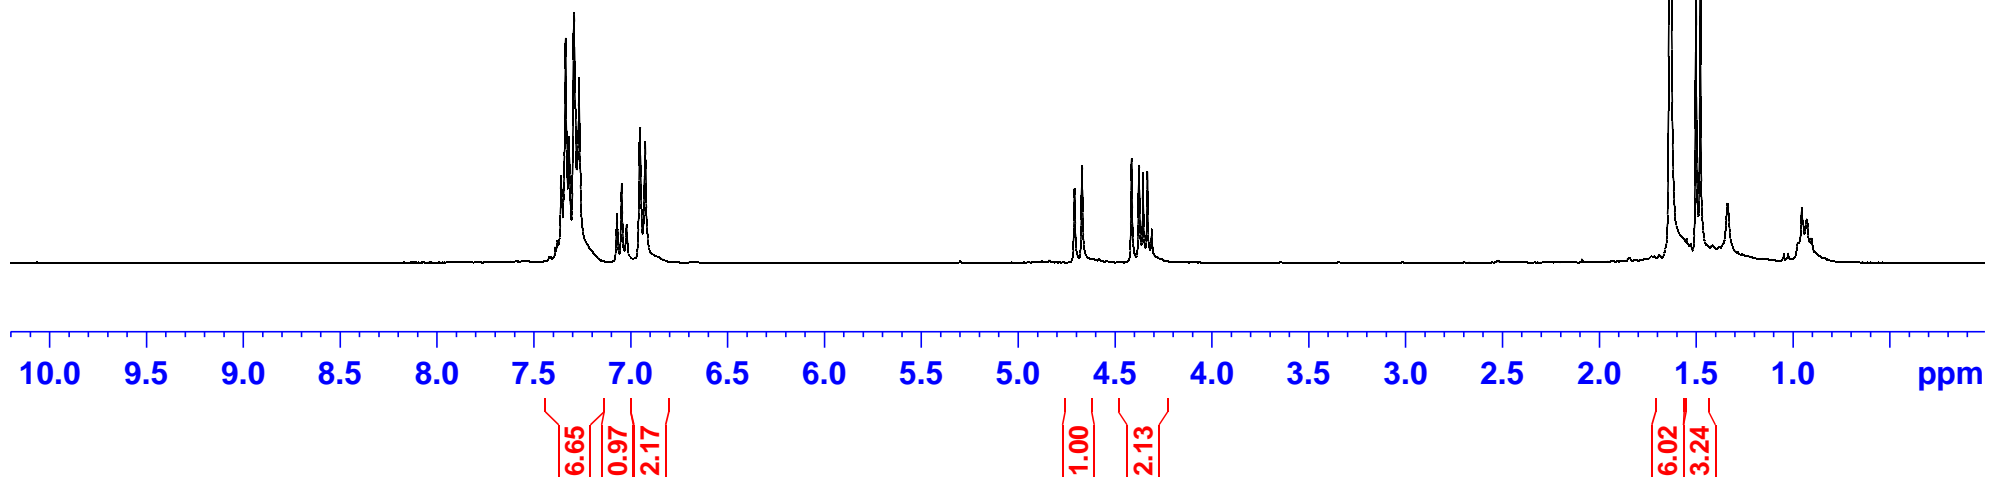

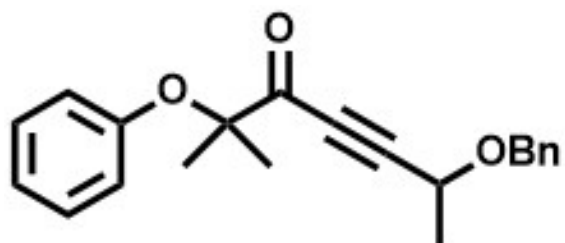

**10aa**

75 MHz, CDCl<sub>3</sub>

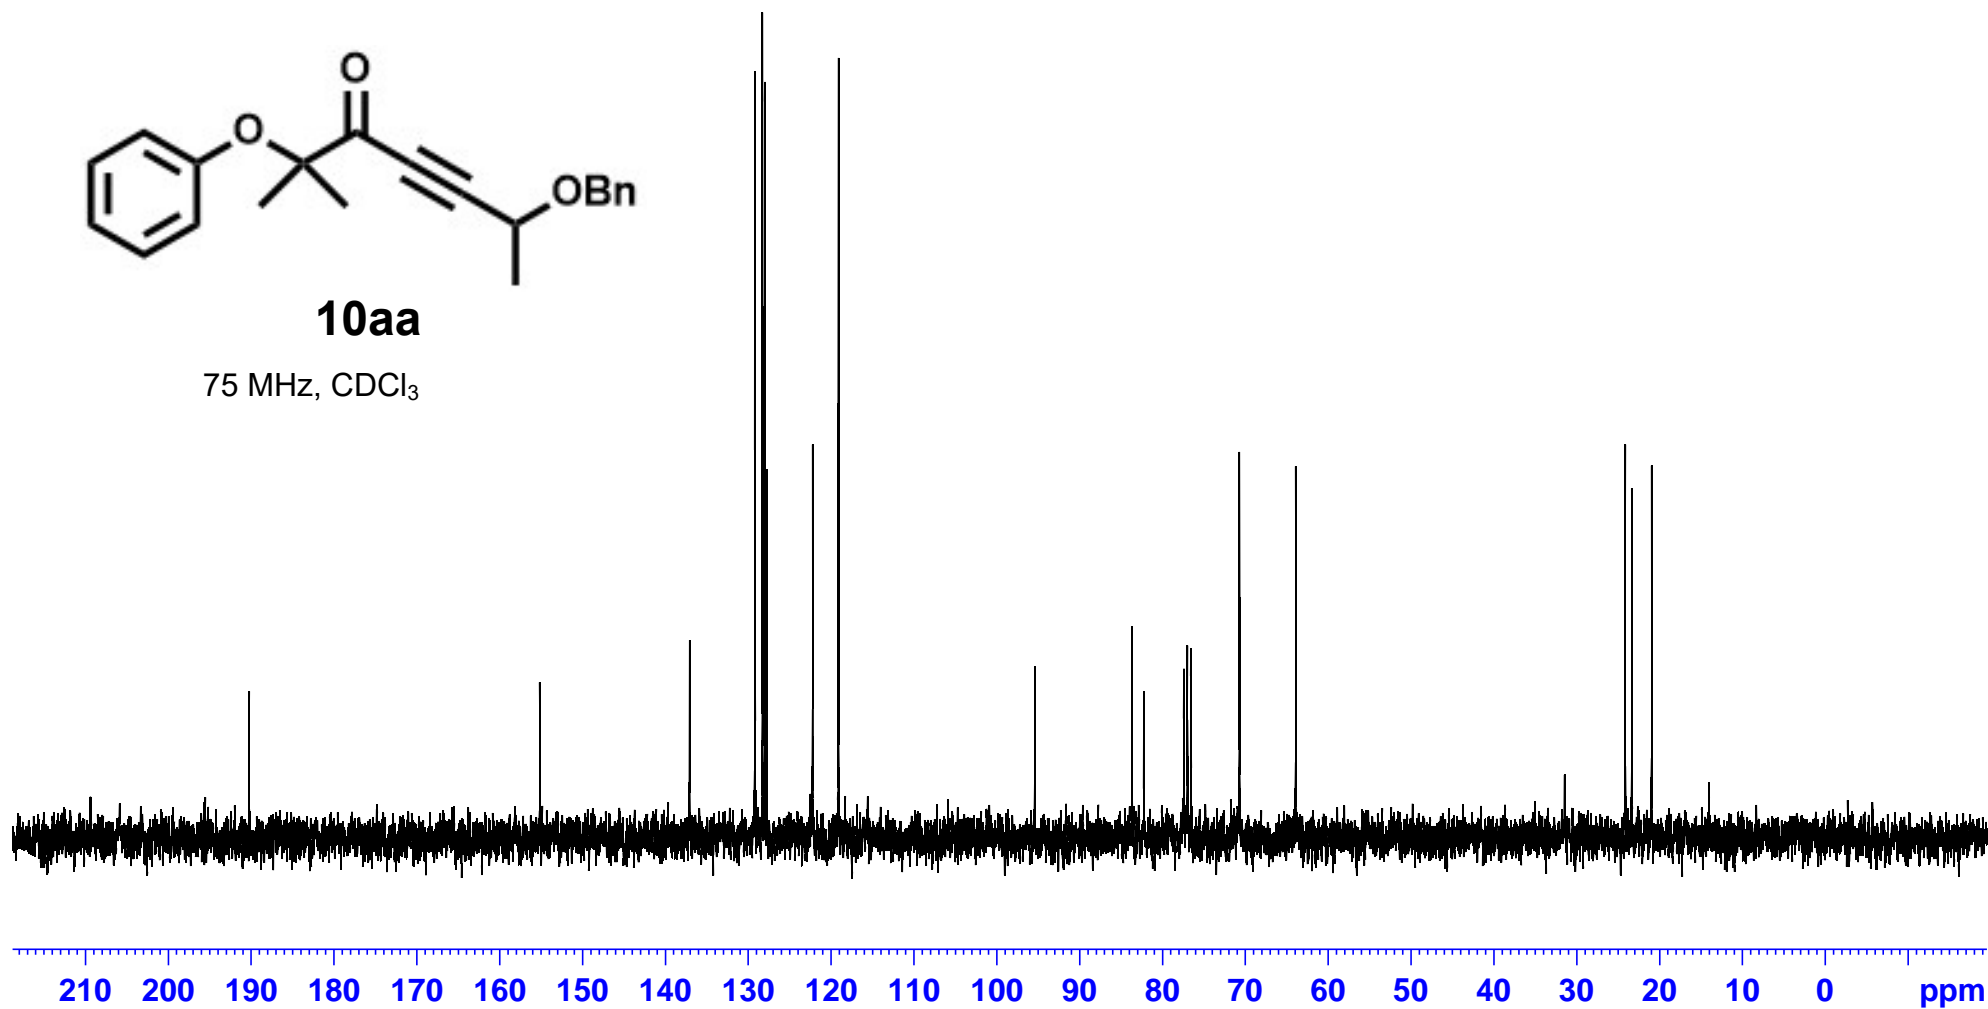

— 190.256

— 155.178

137.082  
129.201  
128.291  
128.009  
127.762  
122.238  
119.123

— 95.420  
83.687  
82.247  
77.422  
76.999  
76.575  
70.721  
— 63.918

24.147  
23.352  
20.957

7.270  
7.057  
7.030  
6.808  
6.798  
6.792  
6.777  
6.770  
6.760

4.268

3.346

2.285

1.523

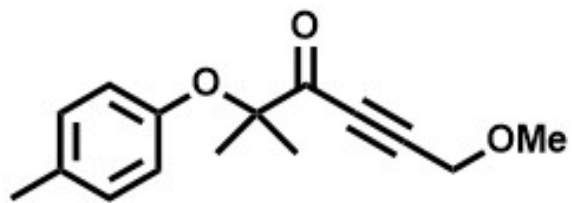

**10b**

300 MHz, CDCl<sub>3</sub>

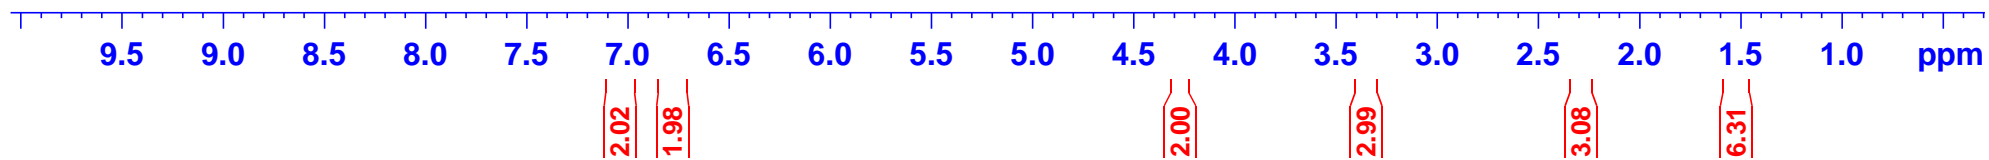

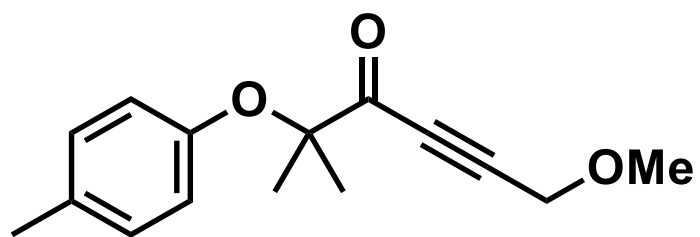

**10b**

75 MHz, CDCl<sub>3</sub>

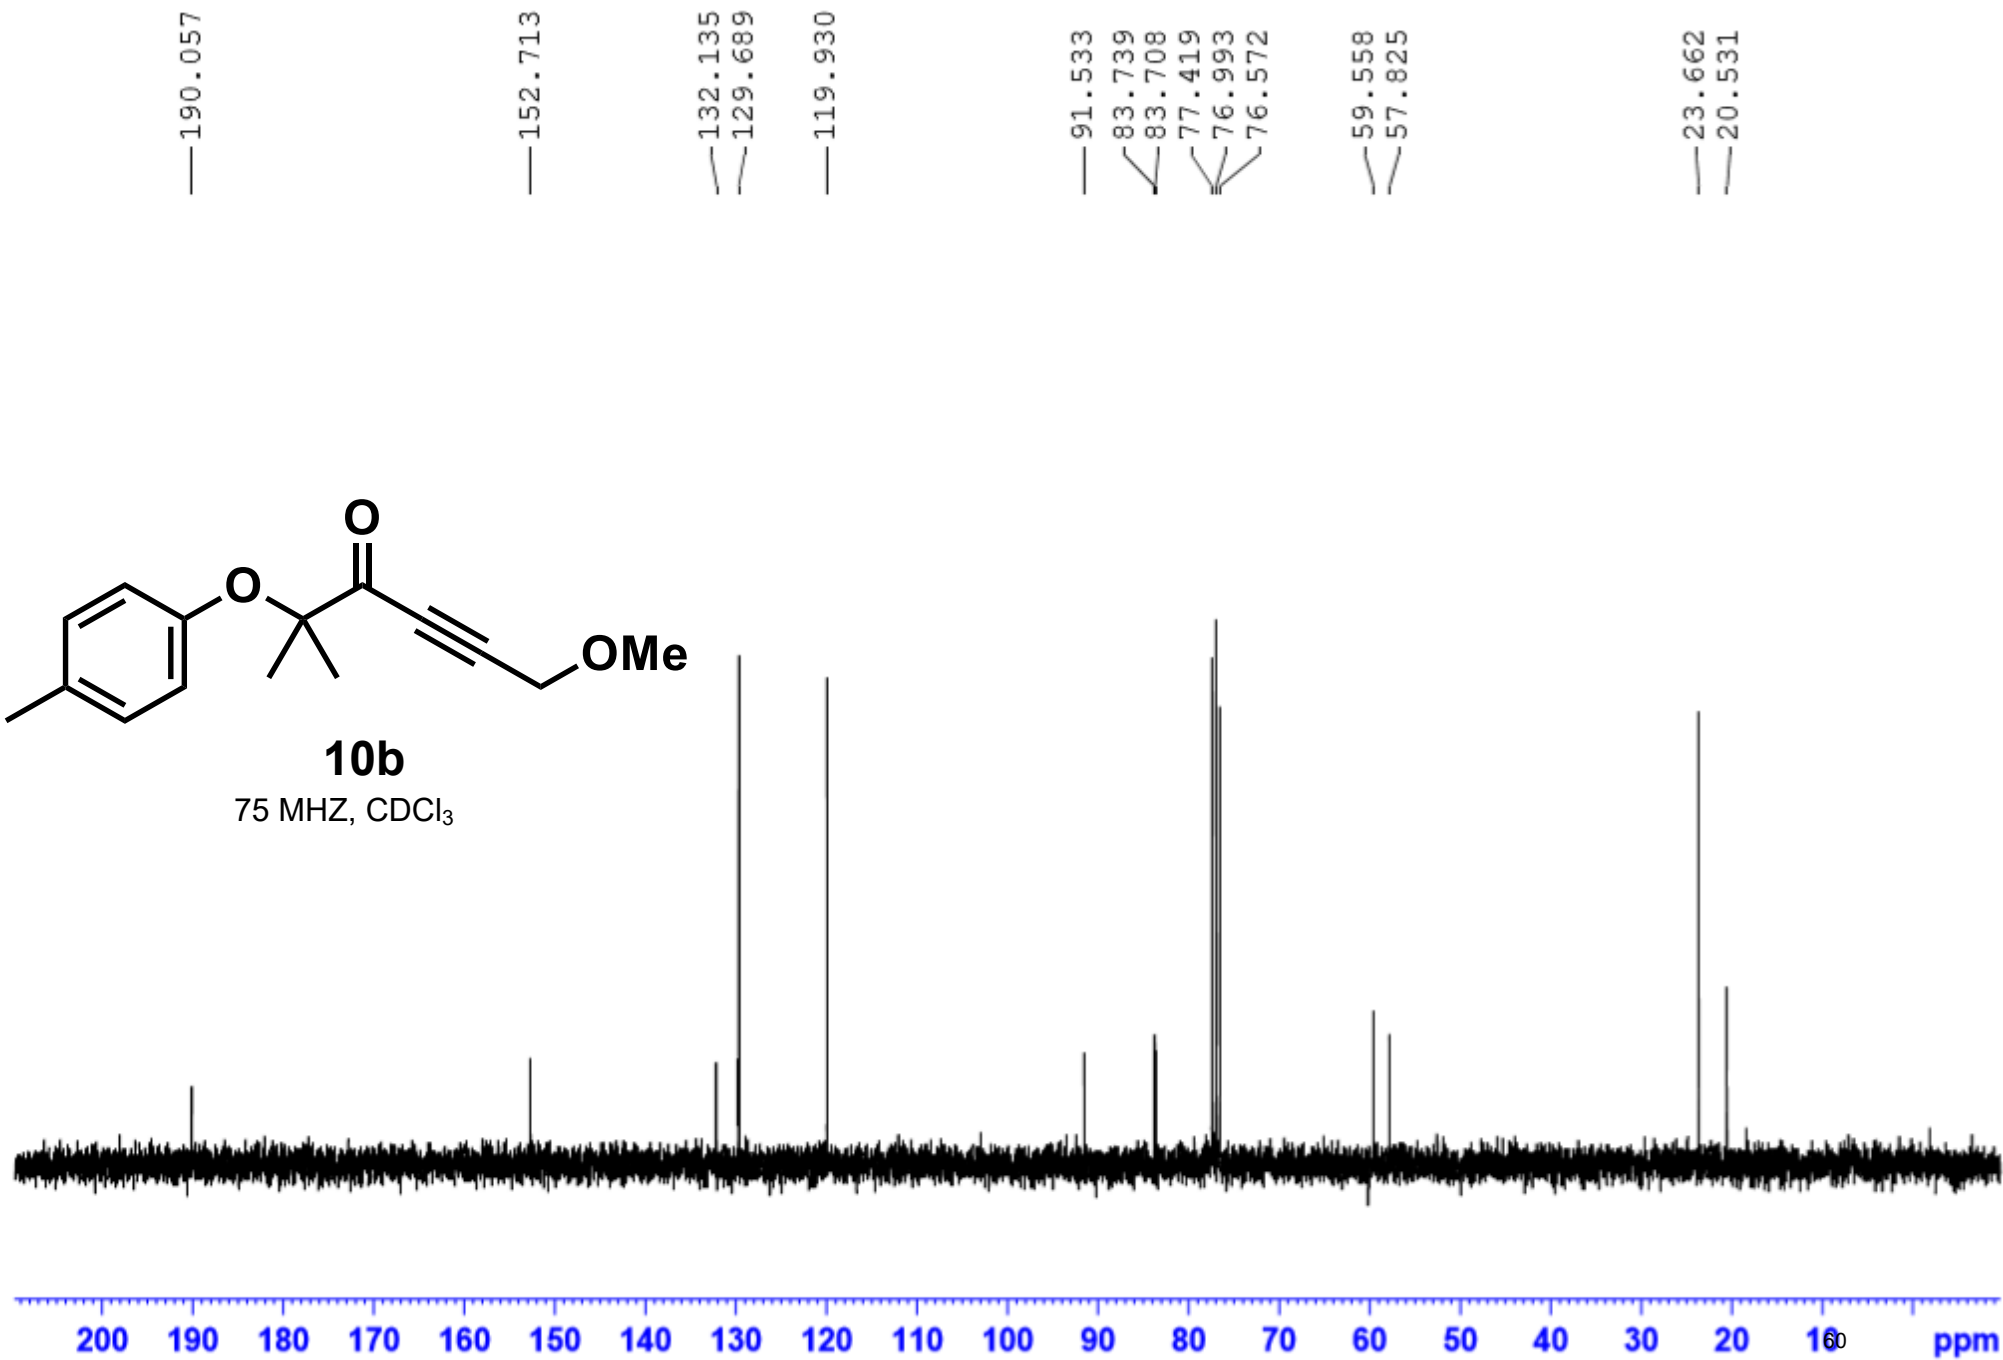

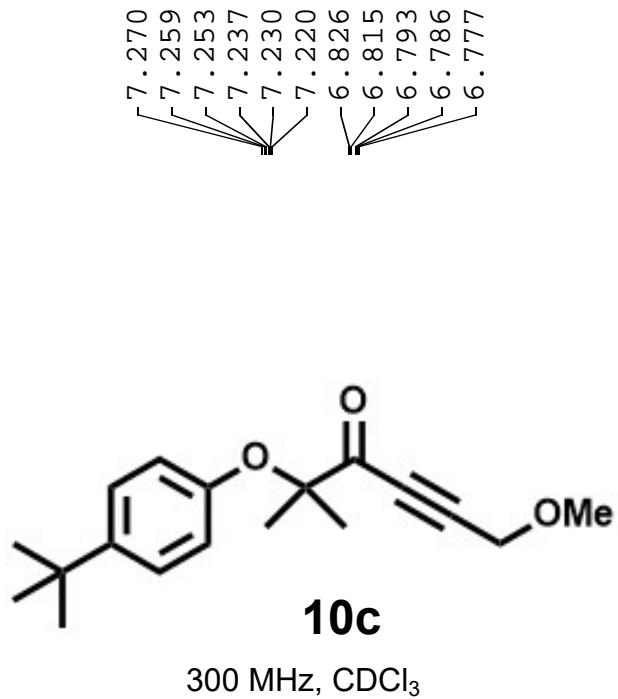

7.270  
 7.259  
 7.253  
 7.237  
 7.230  
 7.220  
 6.826  
 6.815  
 6.793  
 6.786  
 6.777

4.252

3.298

1.535

1.284

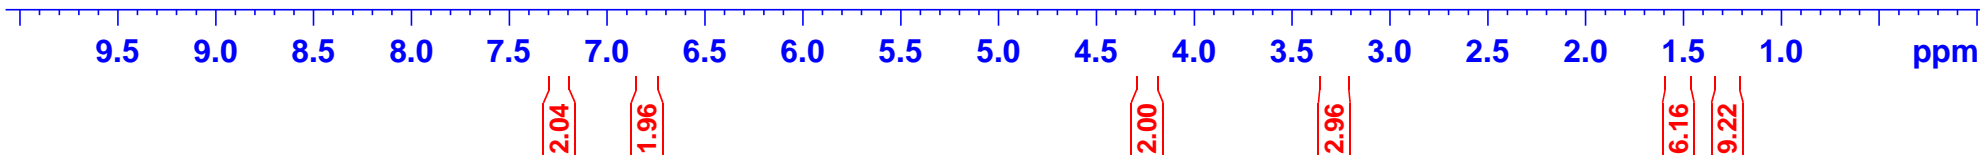

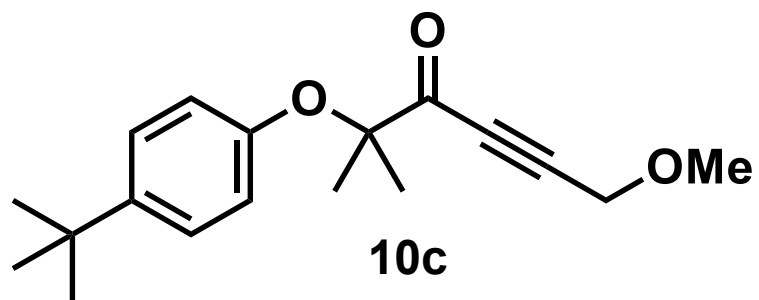

75 MHz, CDCl<sub>3</sub>

—190.096

—152.624

—145.212

—125.943

—119.195

—91.480

—83.728

—83.583

—77.423

—77.001

—76.576

—59.497

—57.725

—34.068

—31.367

—23.695

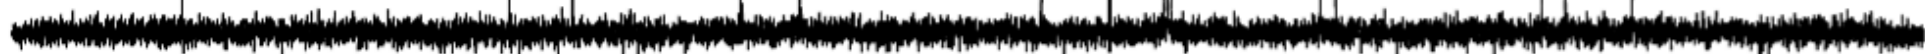

200 190 180 170 160 150 140 130 120 110 100 90 80 70 60 50 40 30 20 10 62 ppm

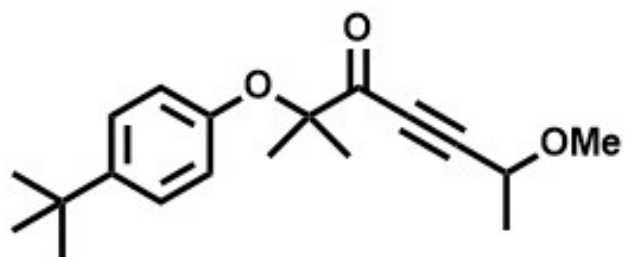

**10cc**

300 MHz, CDCl<sub>3</sub>

7.270  
7.265  
7.254  
7.225  
6.804  
6.774

4.221  
4.199  
4.176  
4.154

— 3.280

1.542  
1.409  
1.386  
1.279

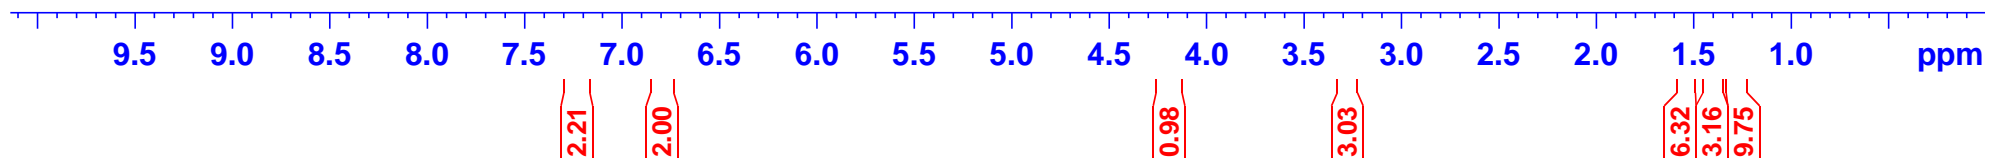

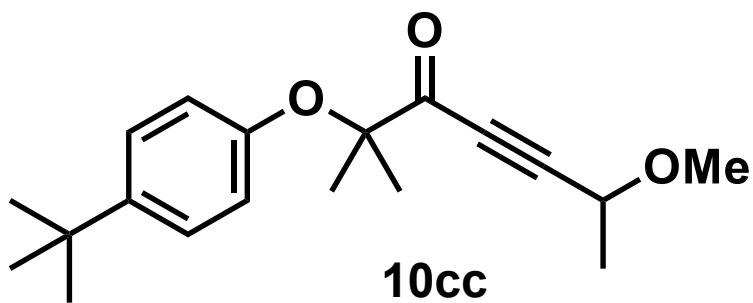

75 MHz, CDCl<sub>3</sub>

—190.416

—152.755

—145.099

—125.937

—118.941

—95.171

83.646

82.305

77.424

77.000

76.576

—66.650

—56.548

34.092

31.401

24.097

23.580

20.874

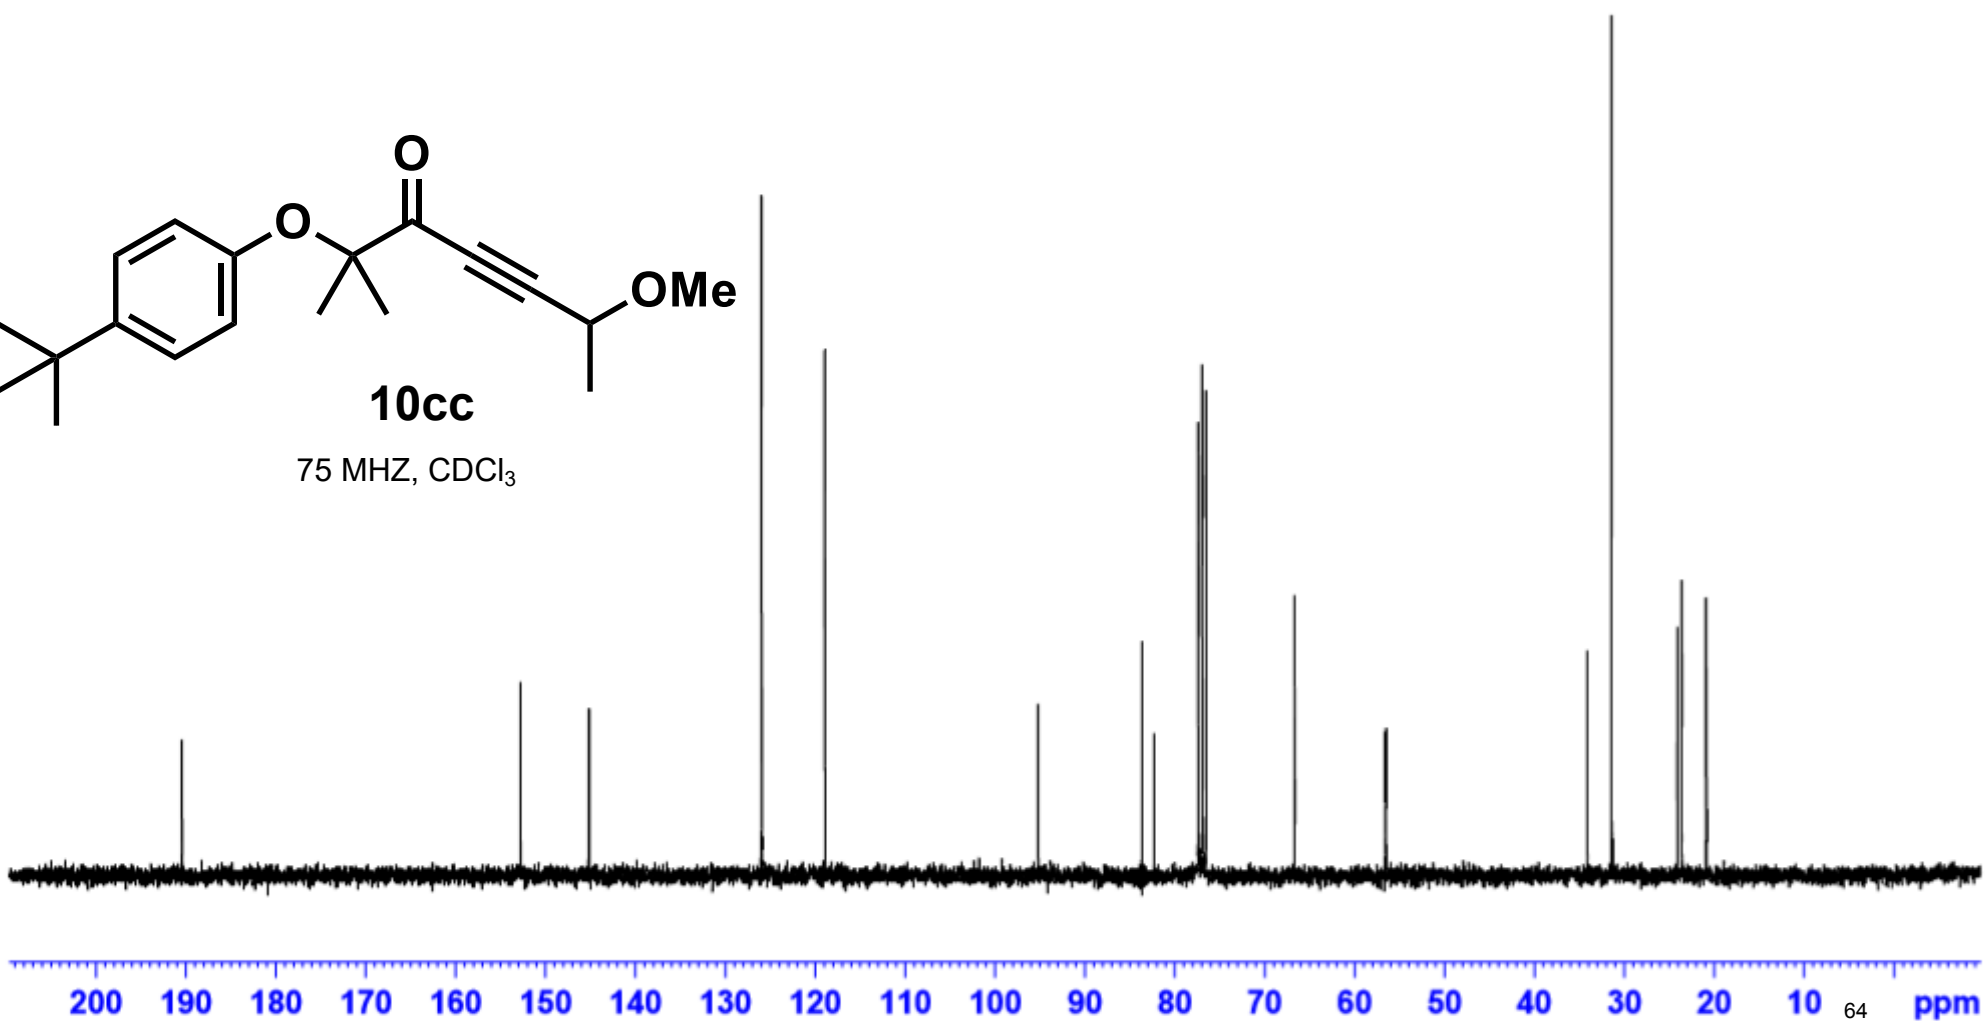



7.386  
7.376  
7.363  
7.358  
7.356  
7.349  
7.342  
7.333  
7.326  
7.318  
7.296  
7.289  
6.937  
6.925  
6.917  
6.903  
6.895  
6.883  
6.839  
6.827  
6.819  
6.805  
6.797  
6.785  
4.771  
4.732  
4.488  
4.450  
4.430  
4.408  
4.386  
4.363  
3.776

1.558  
1.551  
1.548  
1.525

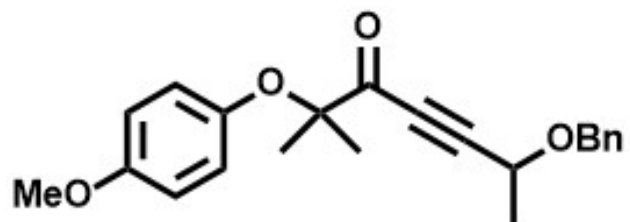

**10d**

300 MHz, CDCl<sub>3</sub>

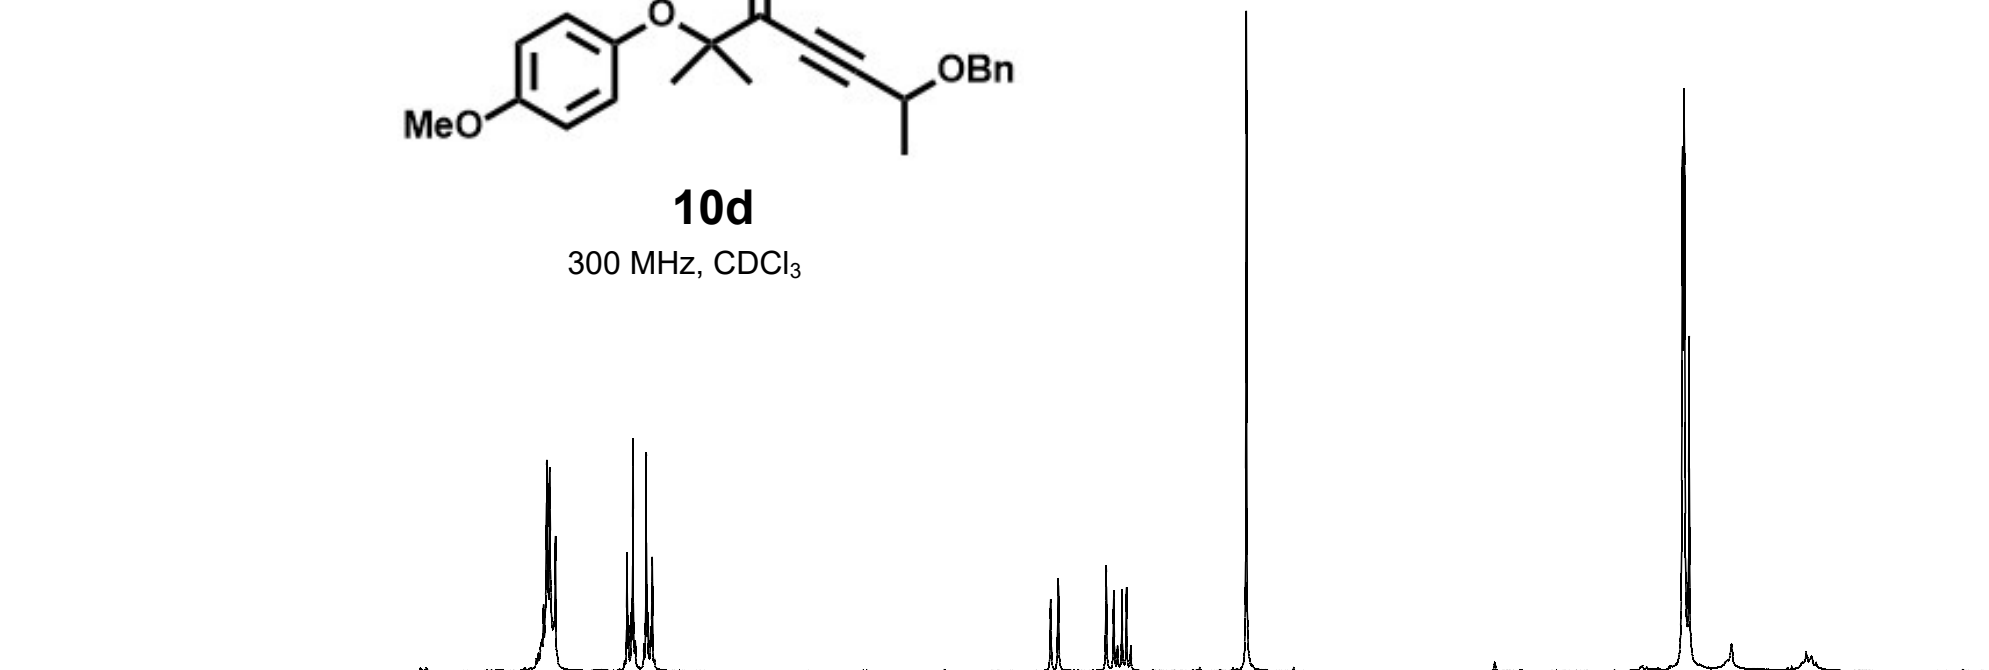

9.5 9.0 8.5 8.0 7.5 7.0 6.5 6.0 5.5 5.0 4.5 4.0 3.5 3.0 2.5 2.0 1.5 1.0 ppm

5.48

2.00  
2.04

1.04

2.07

3.08

9.70

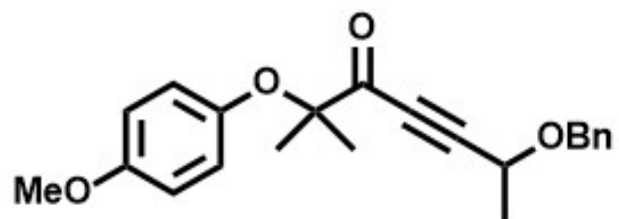

**10d**

75 MHz, CDCl<sub>3</sub>

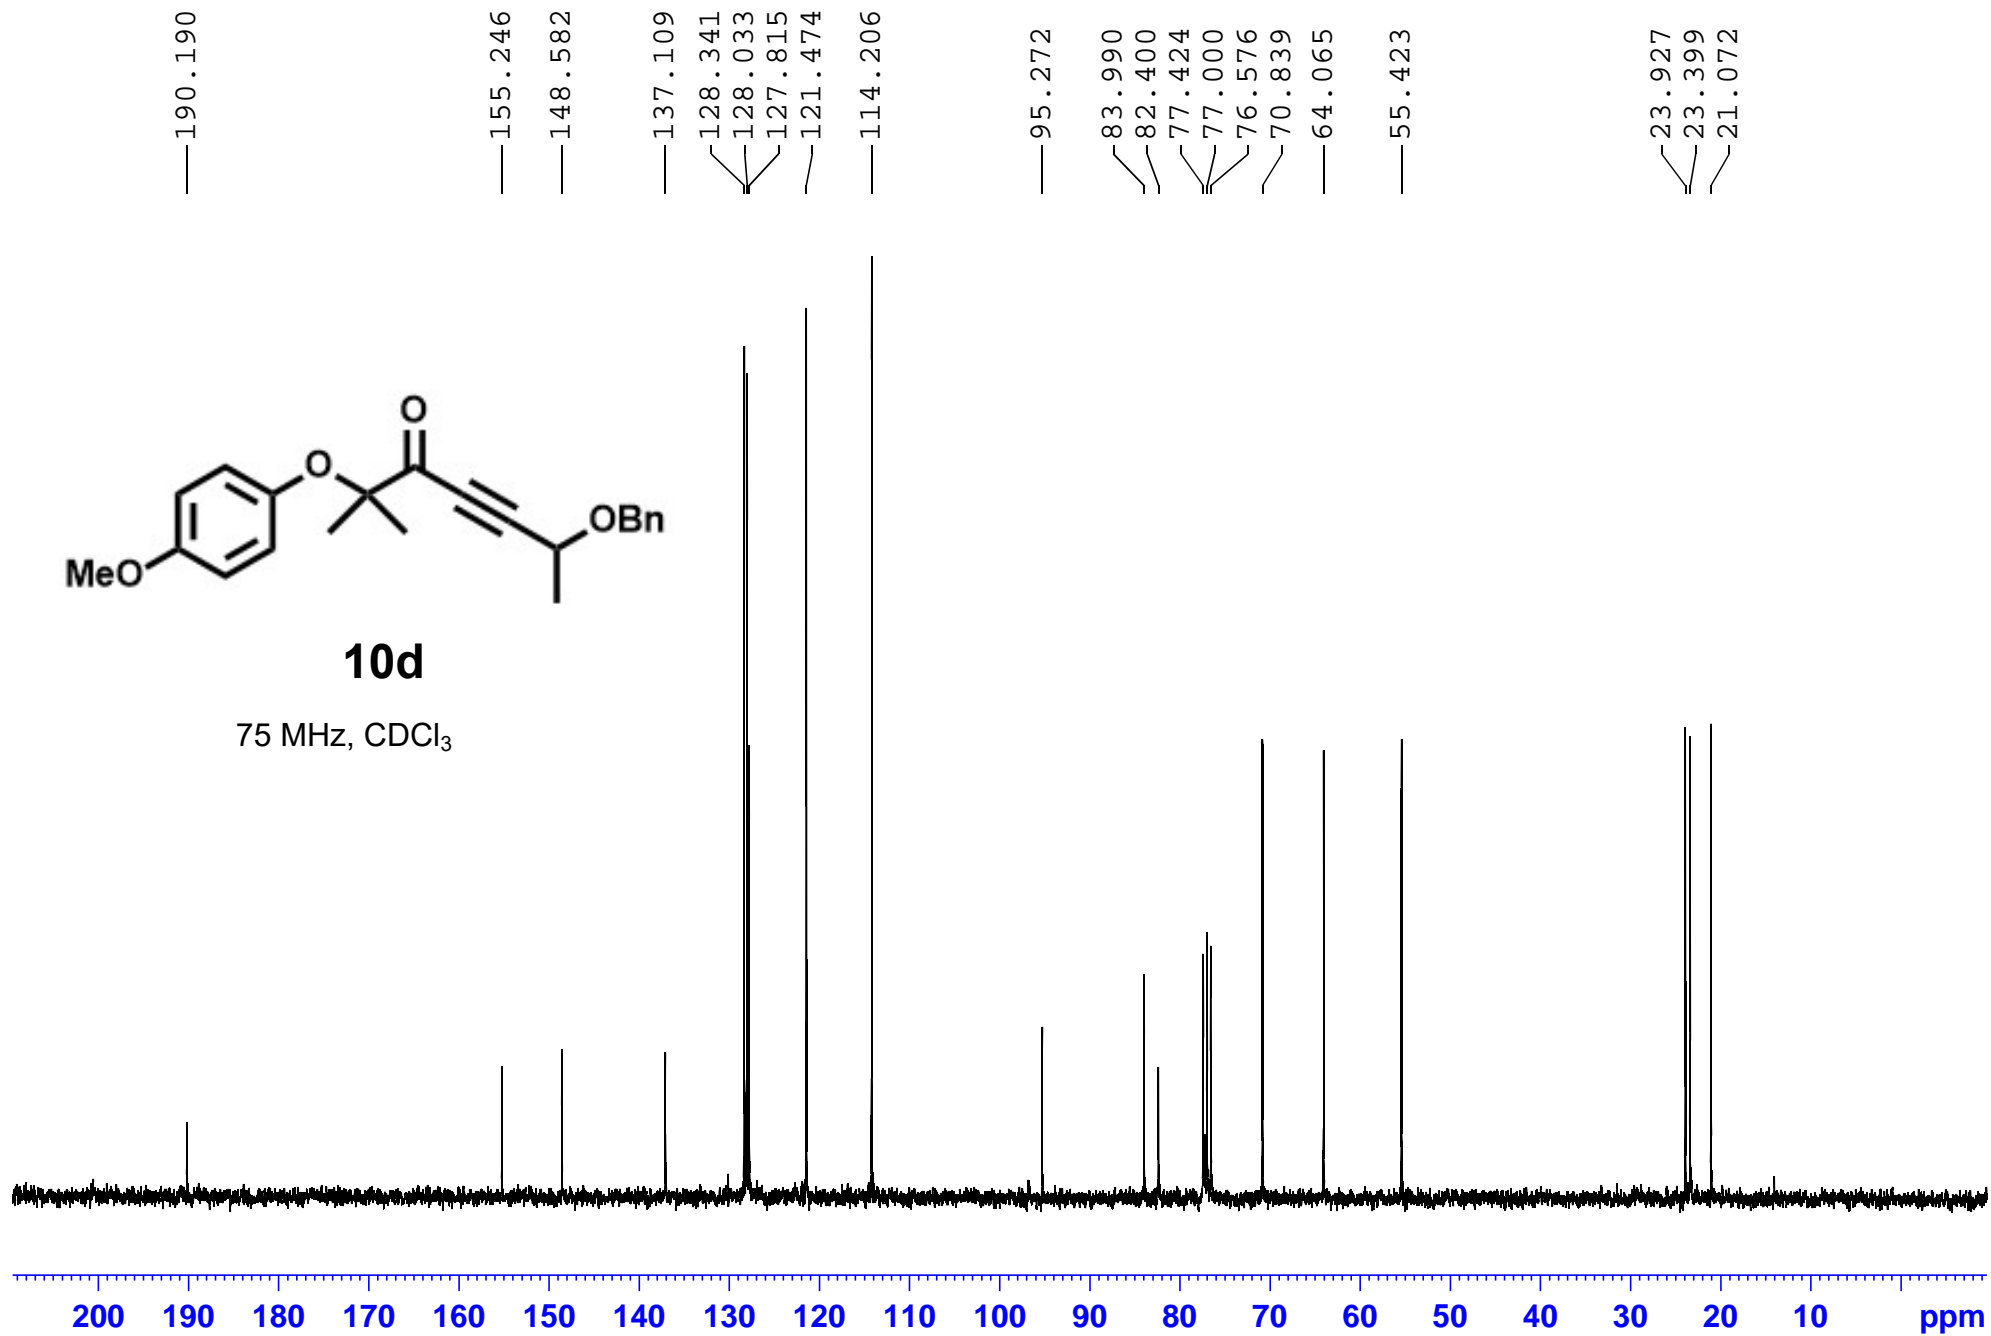

7.345  
7.335  
7.330  
7.316  
7.306  
7.291  
7.283  
7.269  
7.236  
7.213  
7.202  
7.195  
7.179  
7.172  
7.161  
6.825  
6.814  
6.808  
6.791  
6.785  
6.774

4.662  
4.623  
4.382  
4.344  
4.316  
4.294  
4.271

1.557  
1.551  
1.459  
1.436

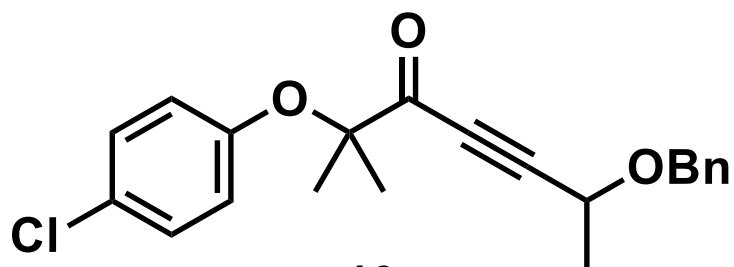

300 MHz, CDCl<sub>3</sub>

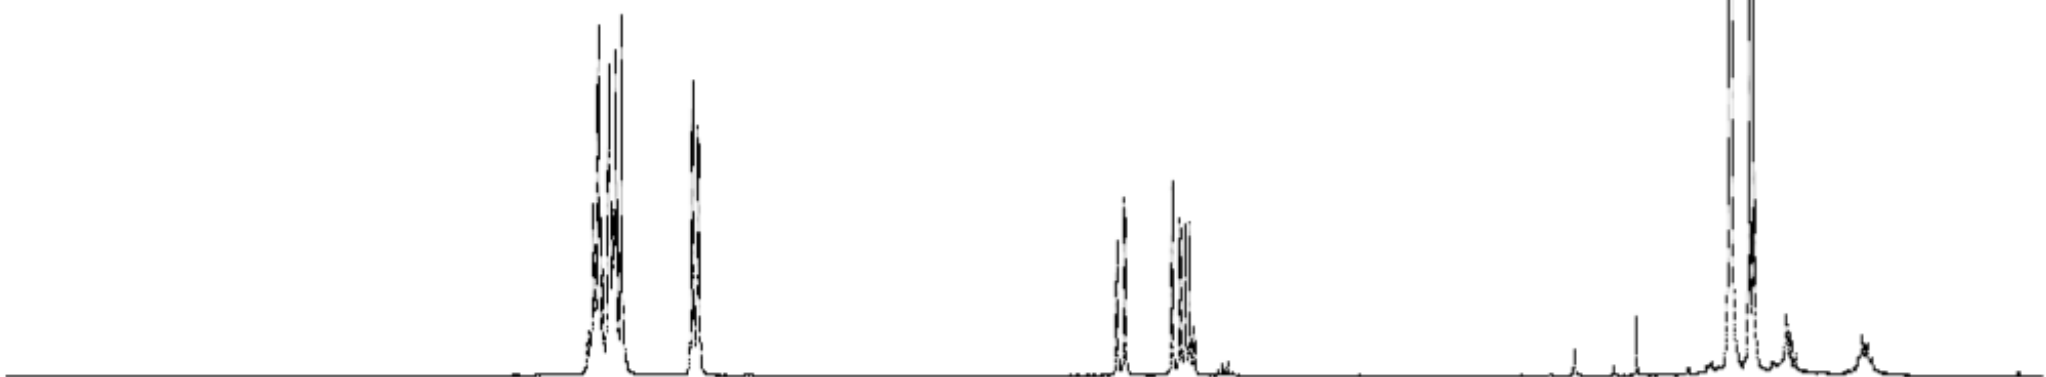

10.0 9.5 9.0 8.5 8.0 7.5 7.0 6.5 6.0 5.5 5.0 4.5 4.0 3.5 3.0 2.5 2.0 1.5 1.0 ppm

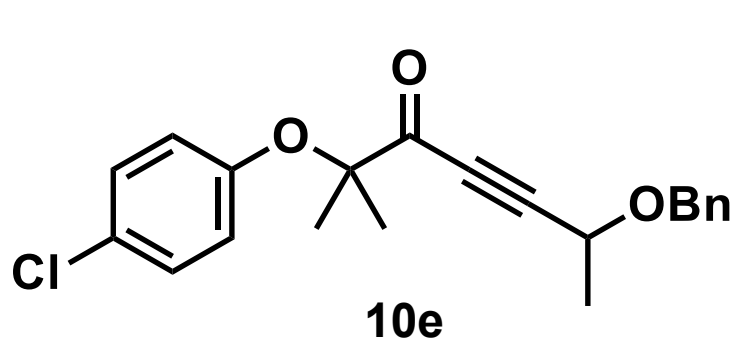

75 MHz, CDCl<sub>3</sub>

— 189.653

— 153.784

137.021  
129.176  
128.359  
127.918  
127.840  
127.403  
120.550

— 95.742

84.122  
82.062  
77.424  
77.000  
76.577  
70.815  
— 64.005

24.015  
23.343  
20.996

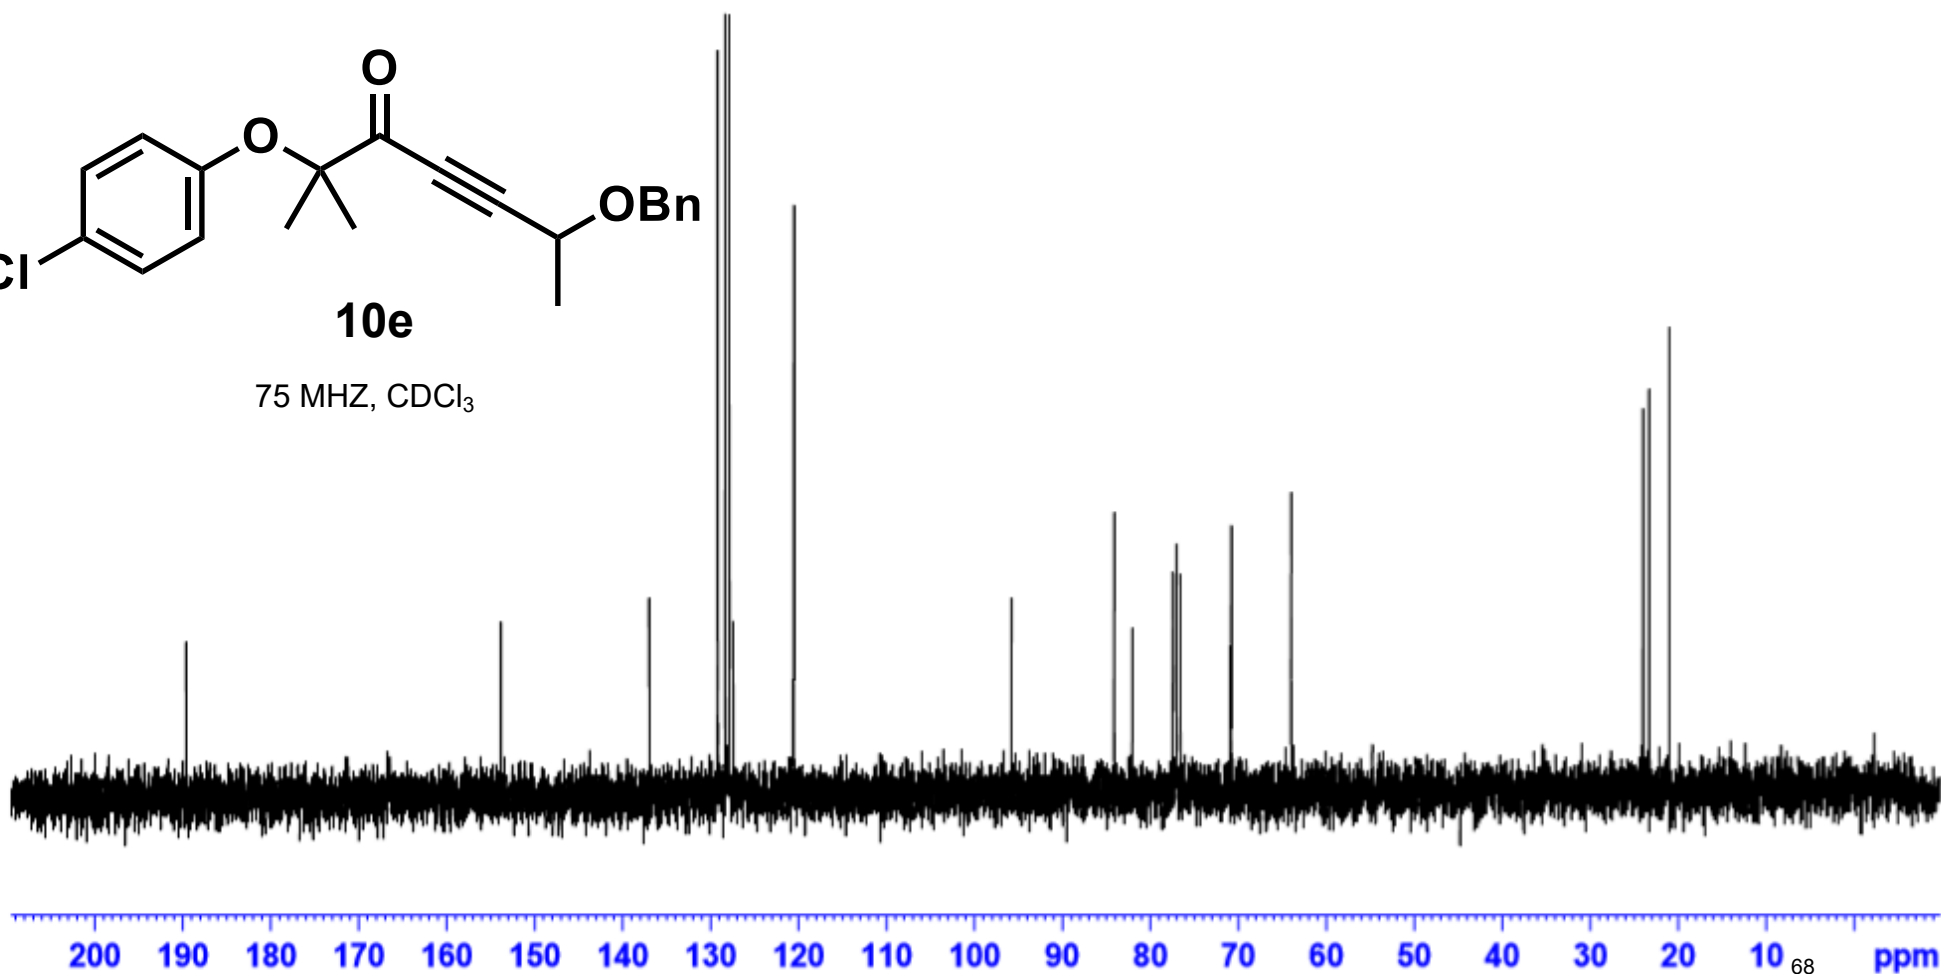

7.406  
7.395  
7.377  
7.353  
7.347  
7.336  
7.306  
7.300  
7.291  
7.281  
7.214  
7.188  
7.162  
6.892  
6.867  
6.794  
6.755  
6.748  
6.728  
6.721

4.723  
4.685  
4.427  
4.401  
4.388  
4.379  
4.356  
4.334

— 2.344

1.647  
1.642  
1.529  
1.506

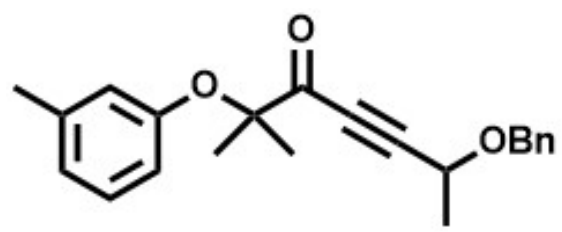

**10f**

300 MHz, CDCl<sub>3</sub>

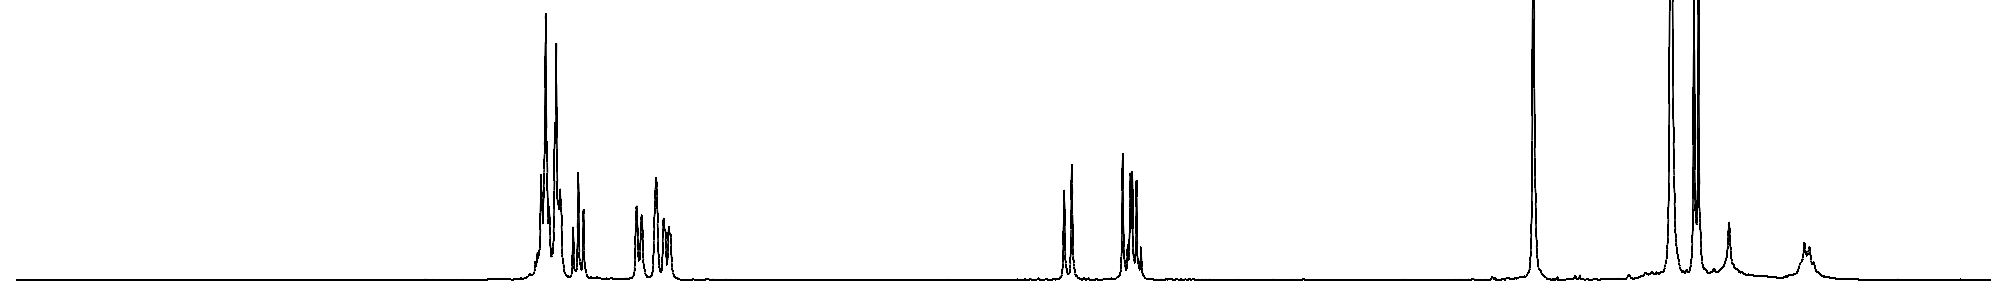

5.33  
1.03  
1.00  
1.98

1.00  
2.02

3.10

6.18  
3.14

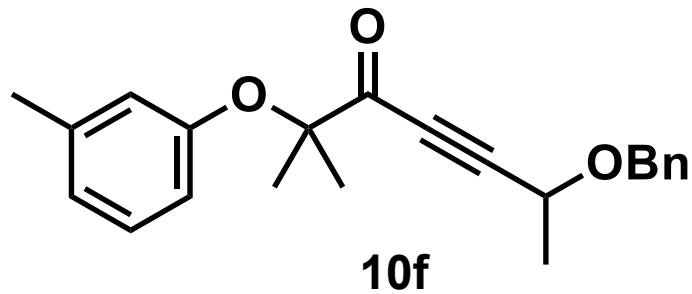

75 MHz, CDCl<sub>3</sub>

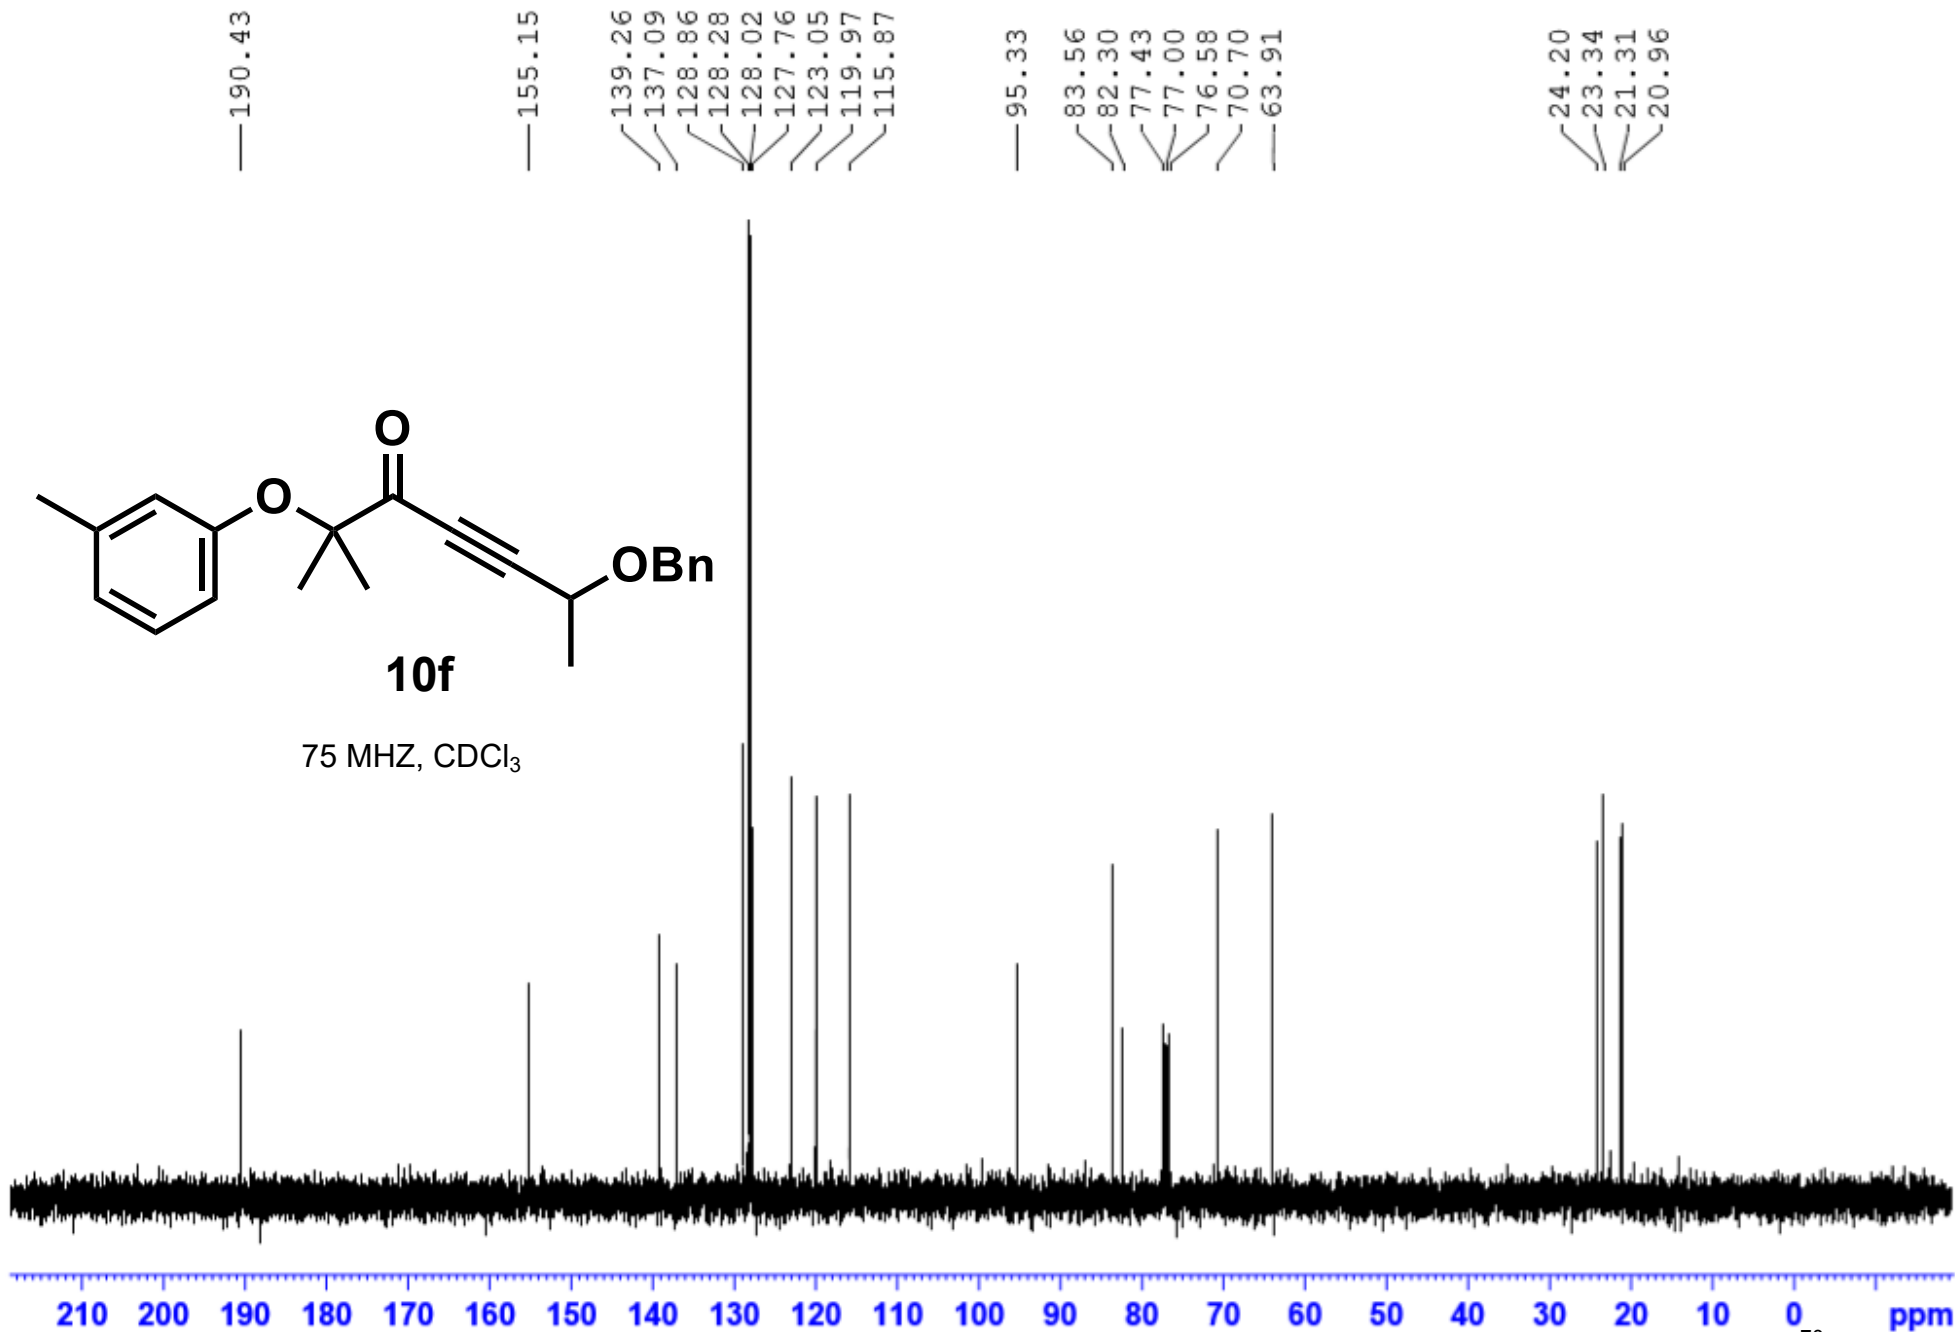

7.338  
7.319  
7.315  
7.298  
7.241  
7.233  
7.216  
7.190  
7.166  
7.126  
7.100  
7.075  
6.953  
6.929  
6.904  
6.726  
6.699

4.668  
4.629  
4.369  
4.347  
4.329  
4.325  
4.302  
4.280

— 2.286

1.633  
1.620  
1.476  
1.454

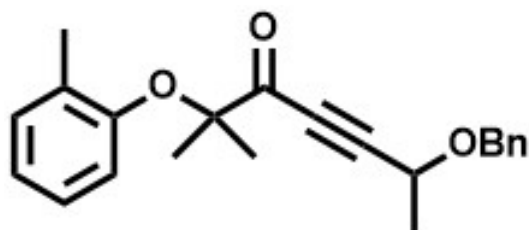

**10g**

300 MHz, CDCl<sub>3</sub>

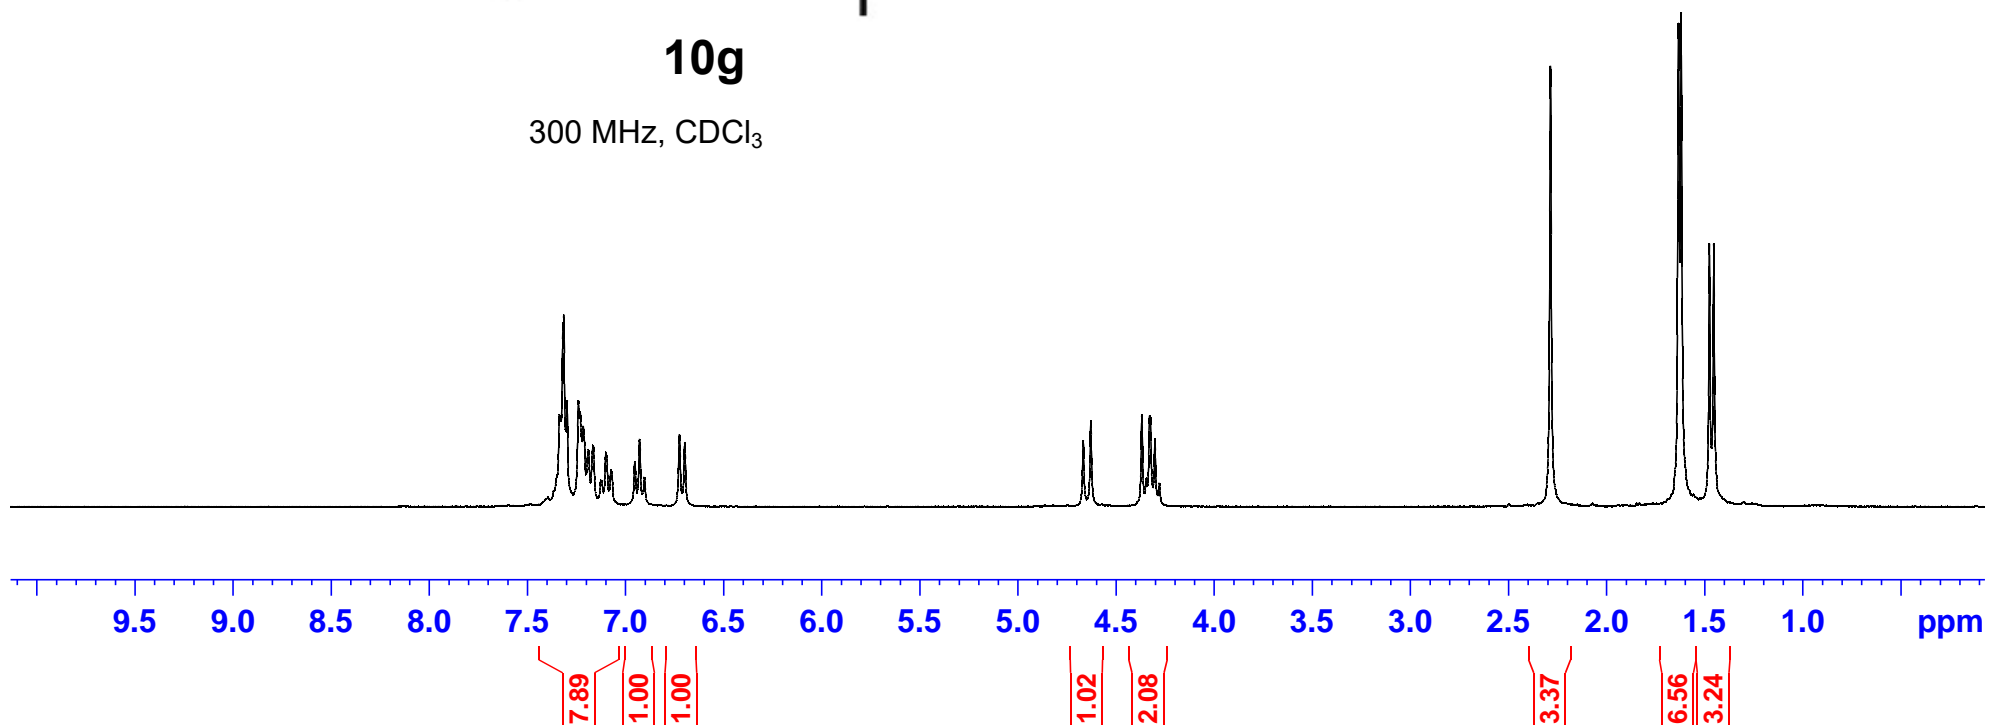

— 190.588

— 153.485

137.058  
131.049  
129.029  
128.243  
127.953  
127.721  
126.209  
121.704  
116.430

— 95.251

83.609  
82.219  
77.435  
77.001  
76.587  
70.611  
— 63.814

24.208  
23.328  
20.923  
16.660

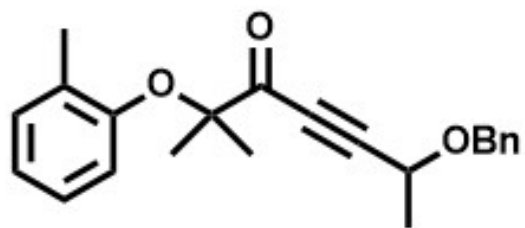

**10g**

75 MHz, CDCl<sub>3</sub>

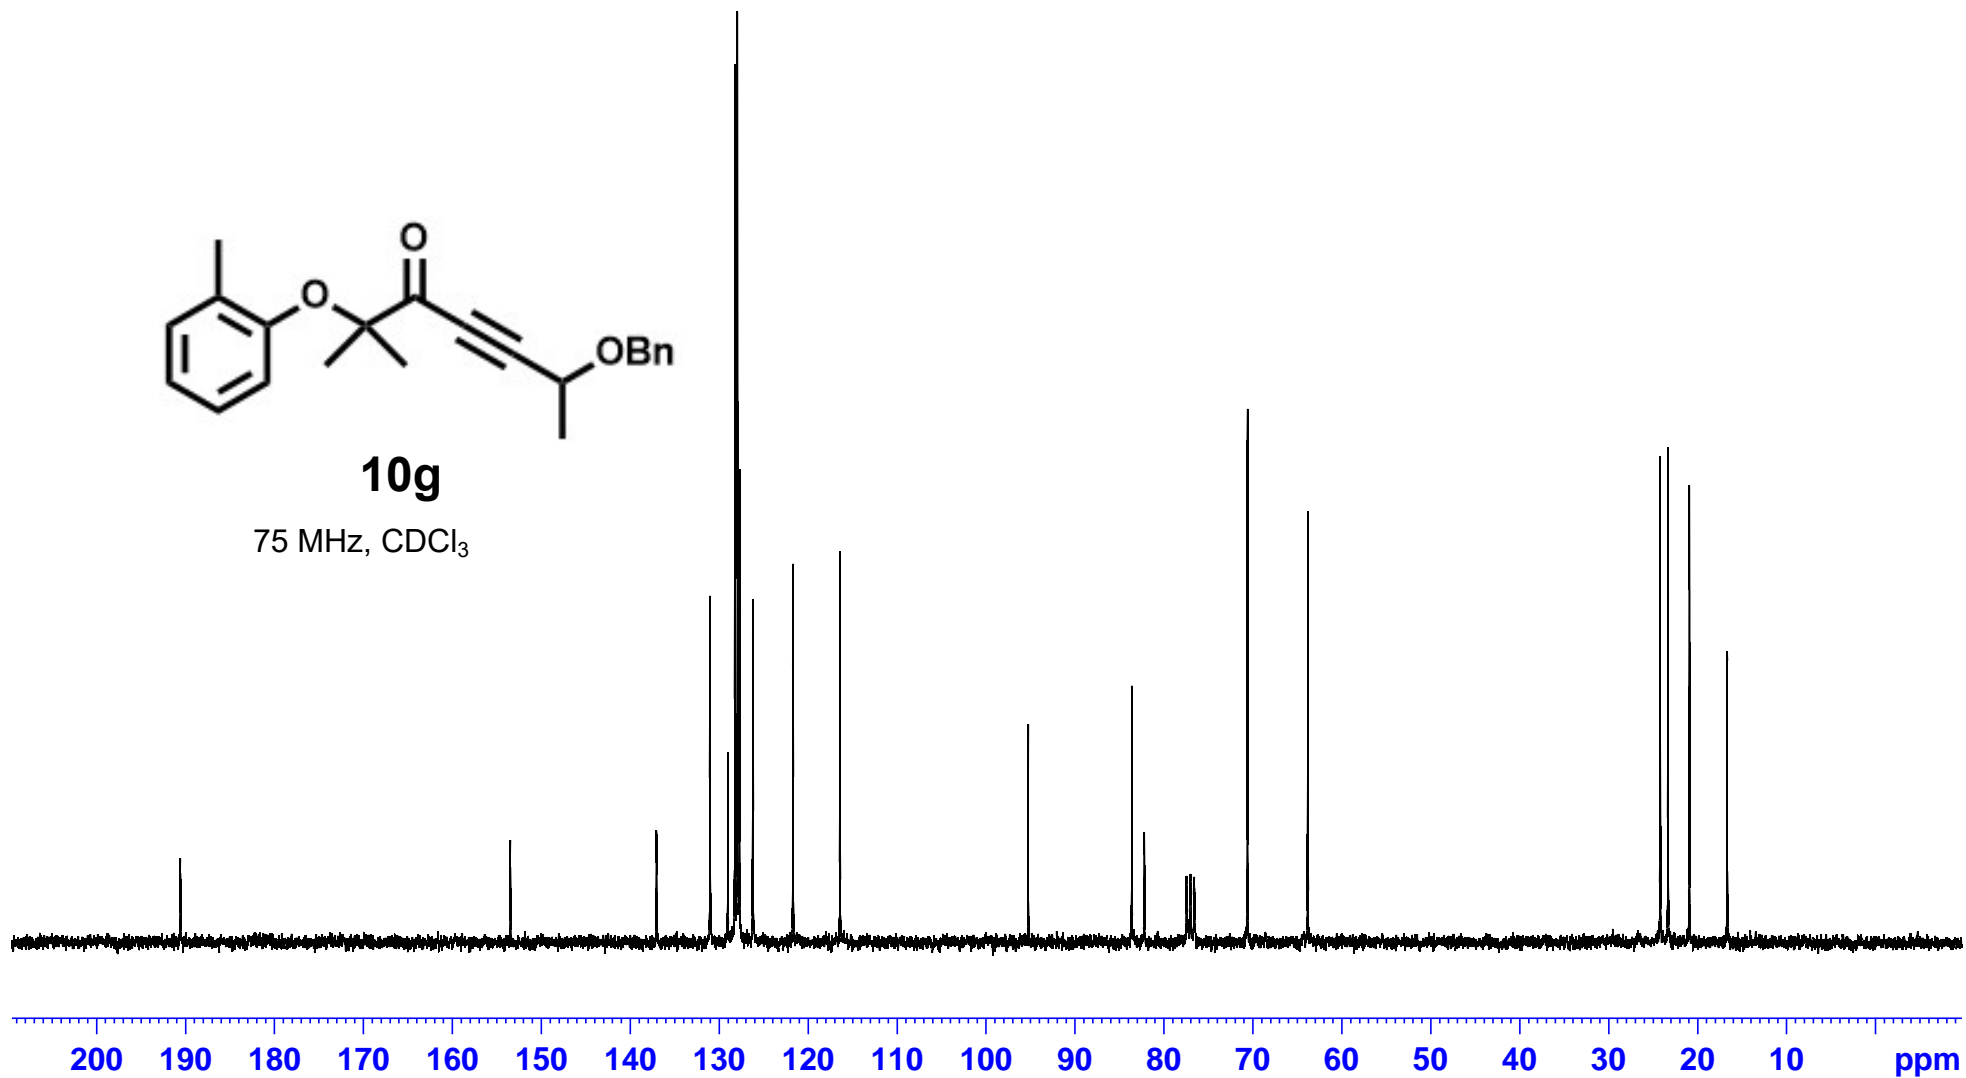



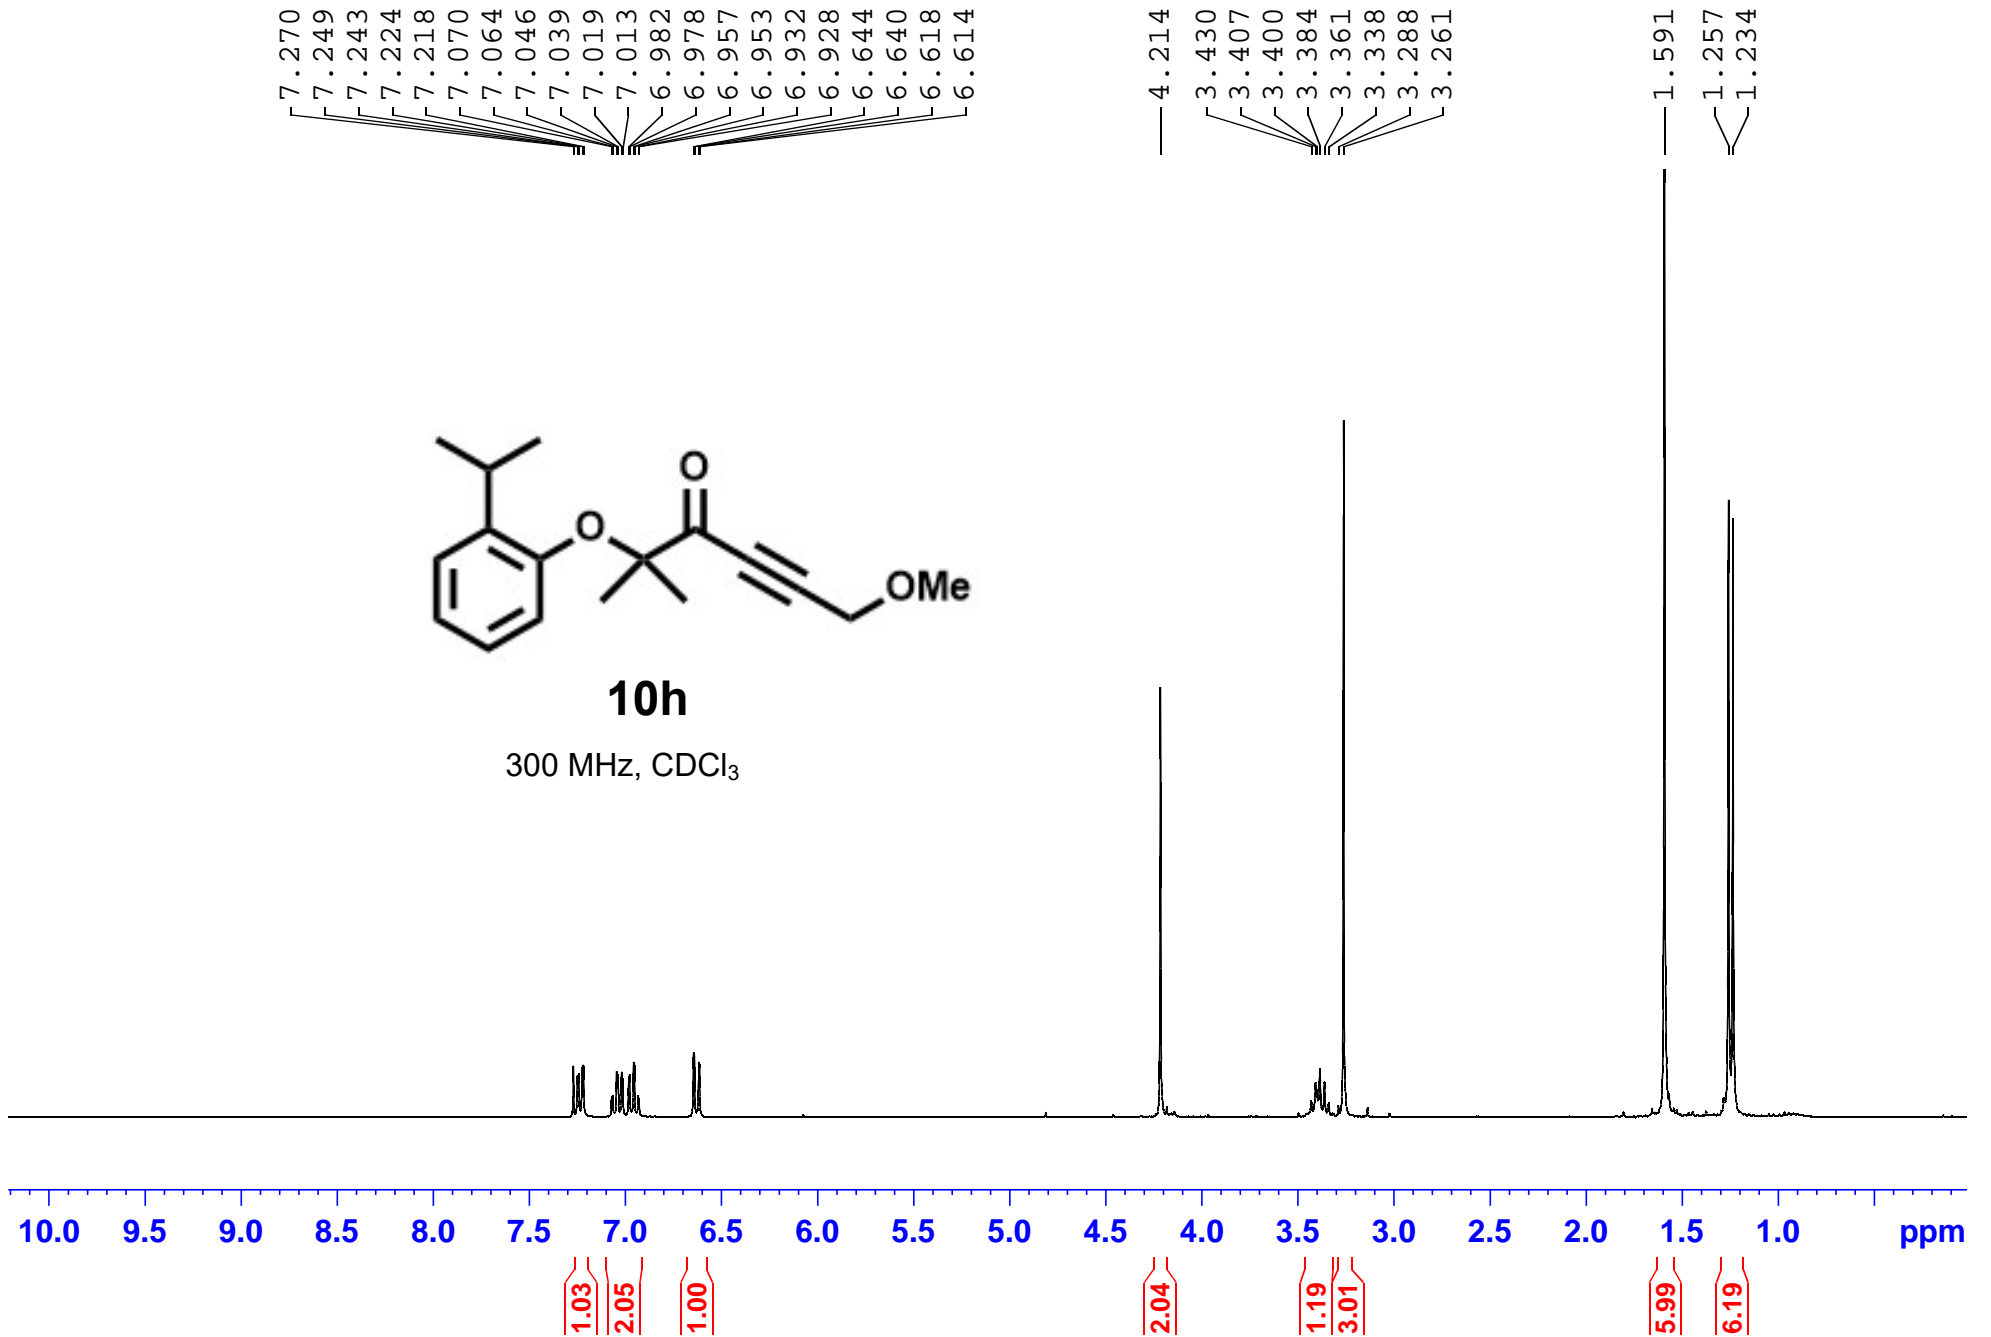

—190.553

—152.317

—139.268

—126.513

—125.923

—121.948

—116.515

—91.533

—83.654

—83.407

—77.424

—77.000

—76.578

—59.460

—57.676

—27.042

—23.738

—22.688

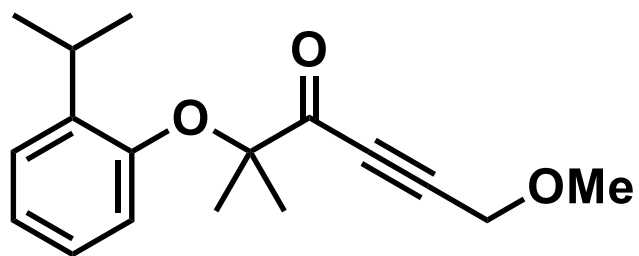

**10h**

75 MHz, CDCl<sub>3</sub>

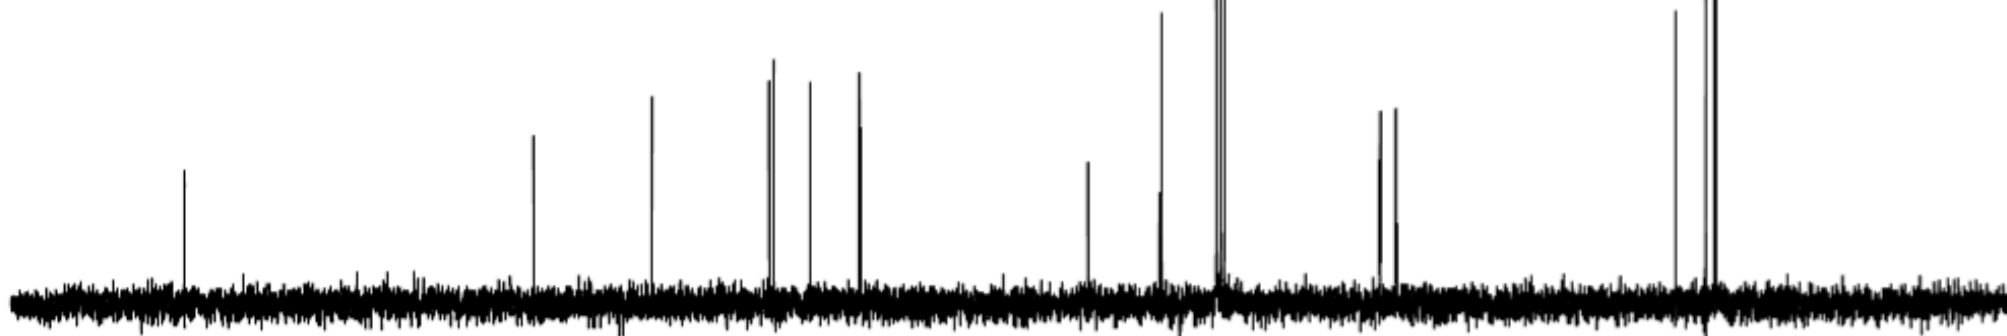

200 190 180 170 160 150 140 130 120 110 100 90 80 70 60 50 40 30 20 10 ppm

74

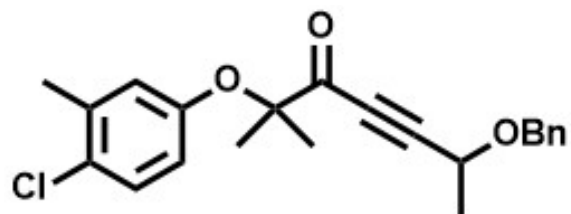

**10i**

300 MHz, CDCl<sub>3</sub>

7.366  
7.355  
7.337  
7.314  
7.296  
7.271  
7.249  
7.223  
7.214  
7.184  
6.790  
6.783  
6.664  
6.656  
6.636  
6.627

4.682  
4.643  
4.397  
4.359  
4.346  
4.323  
4.301

— 2.296

1.575  
1.492  
1.470

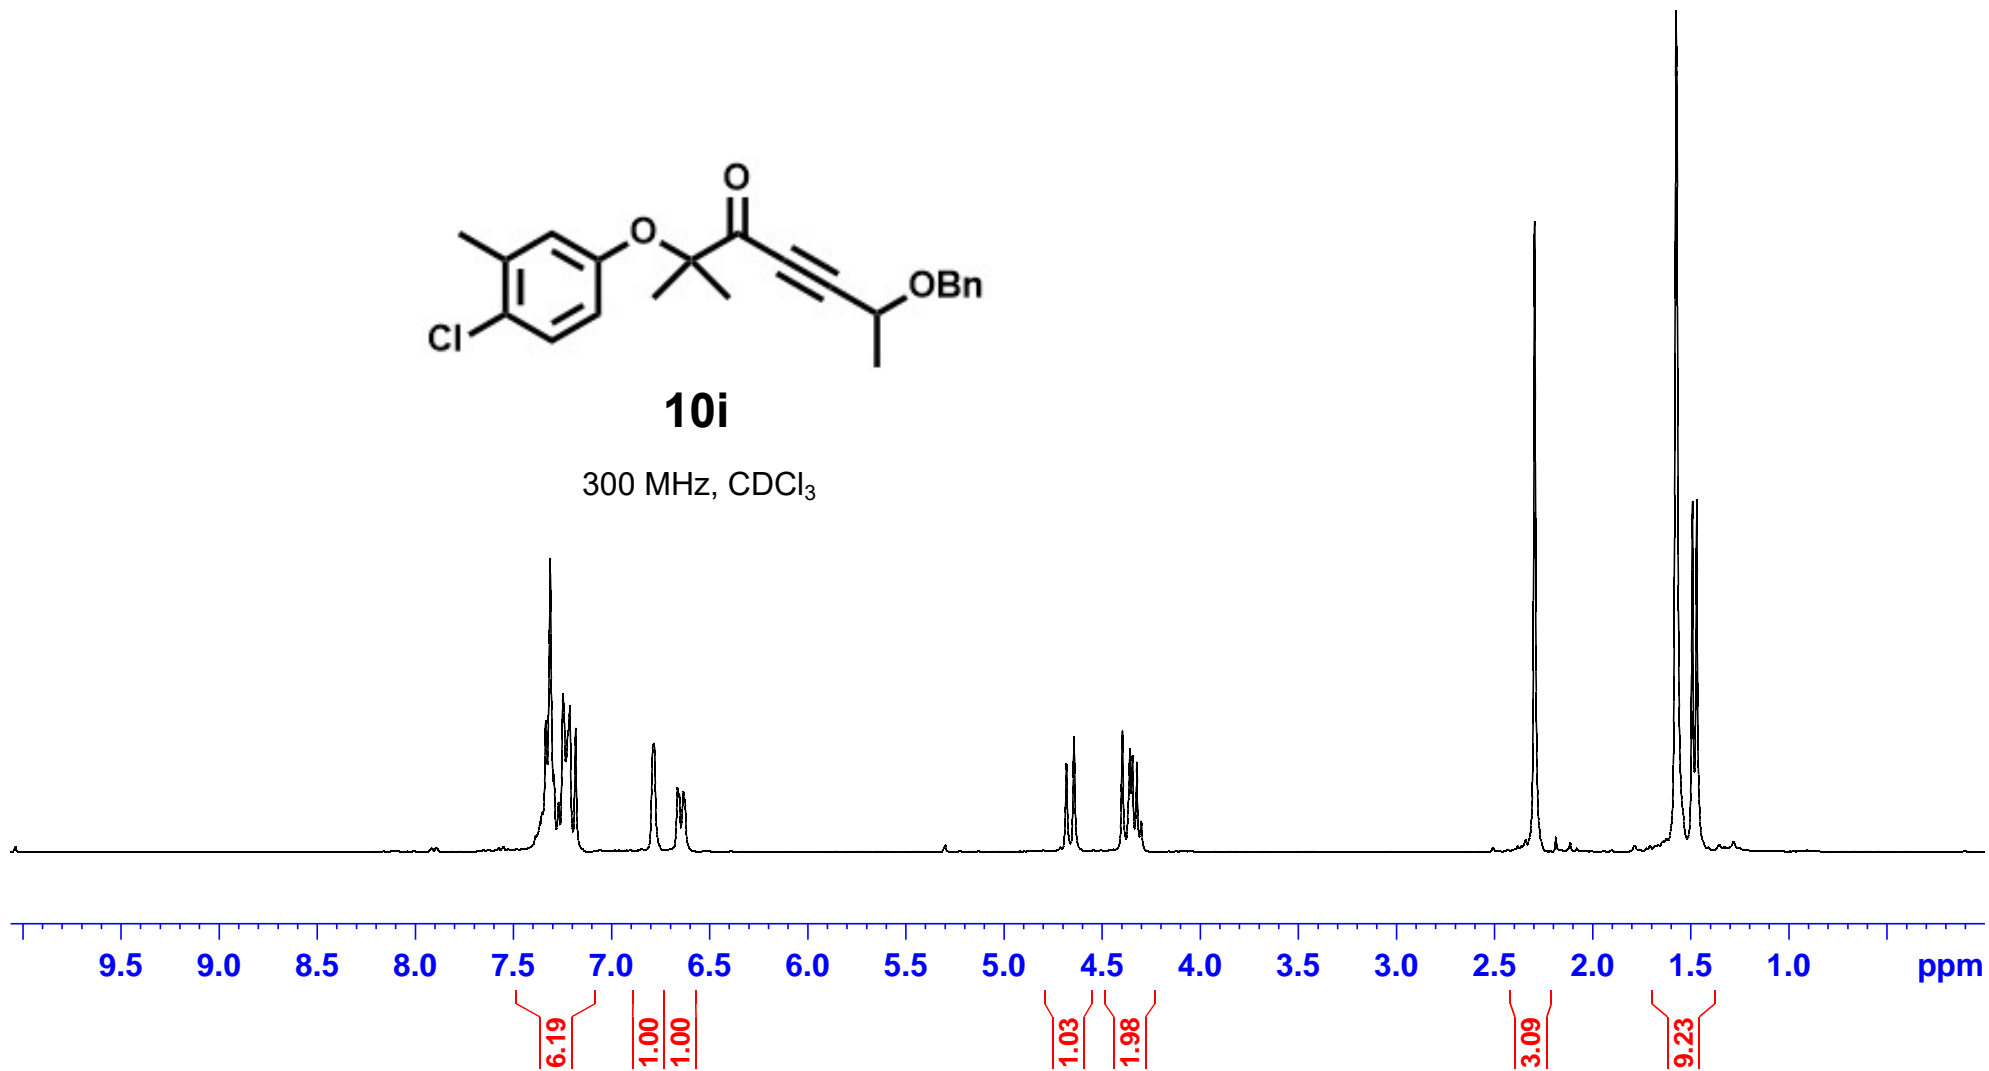

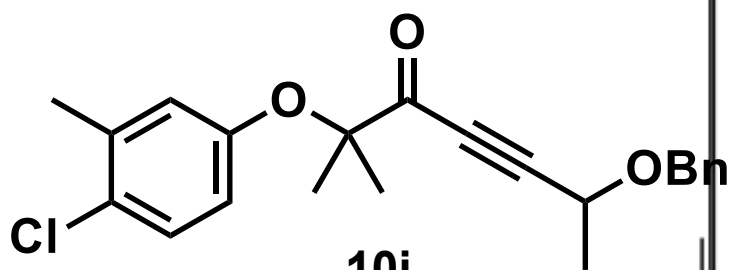

75 MHz, CDCl<sub>3</sub>

190.00

153.67

137.02

129.38

128.39

127.98

127.88

127.66

121.89

117.76

95.68

84.01

82.17

77.42

77.00

76.56

70.83

64.01

24.13

23.36

21.02

20.18

200

180

160

140

120

100

80

60

40

20

0

ppm

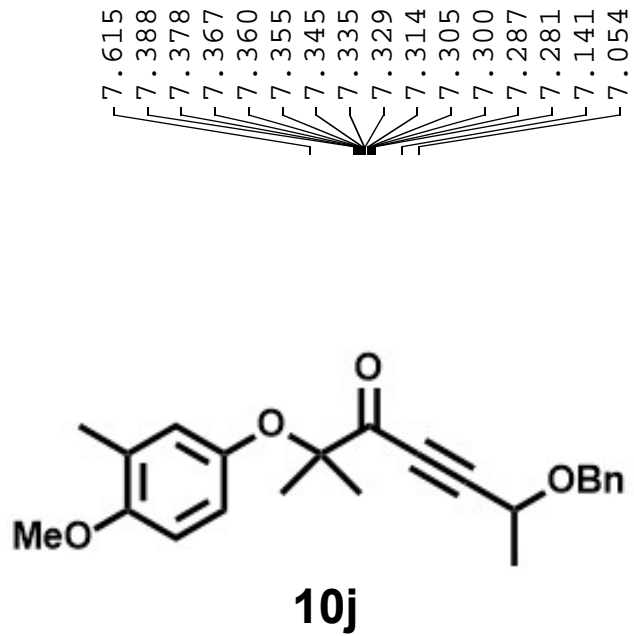

300 MHz, CDCl<sub>3</sub>

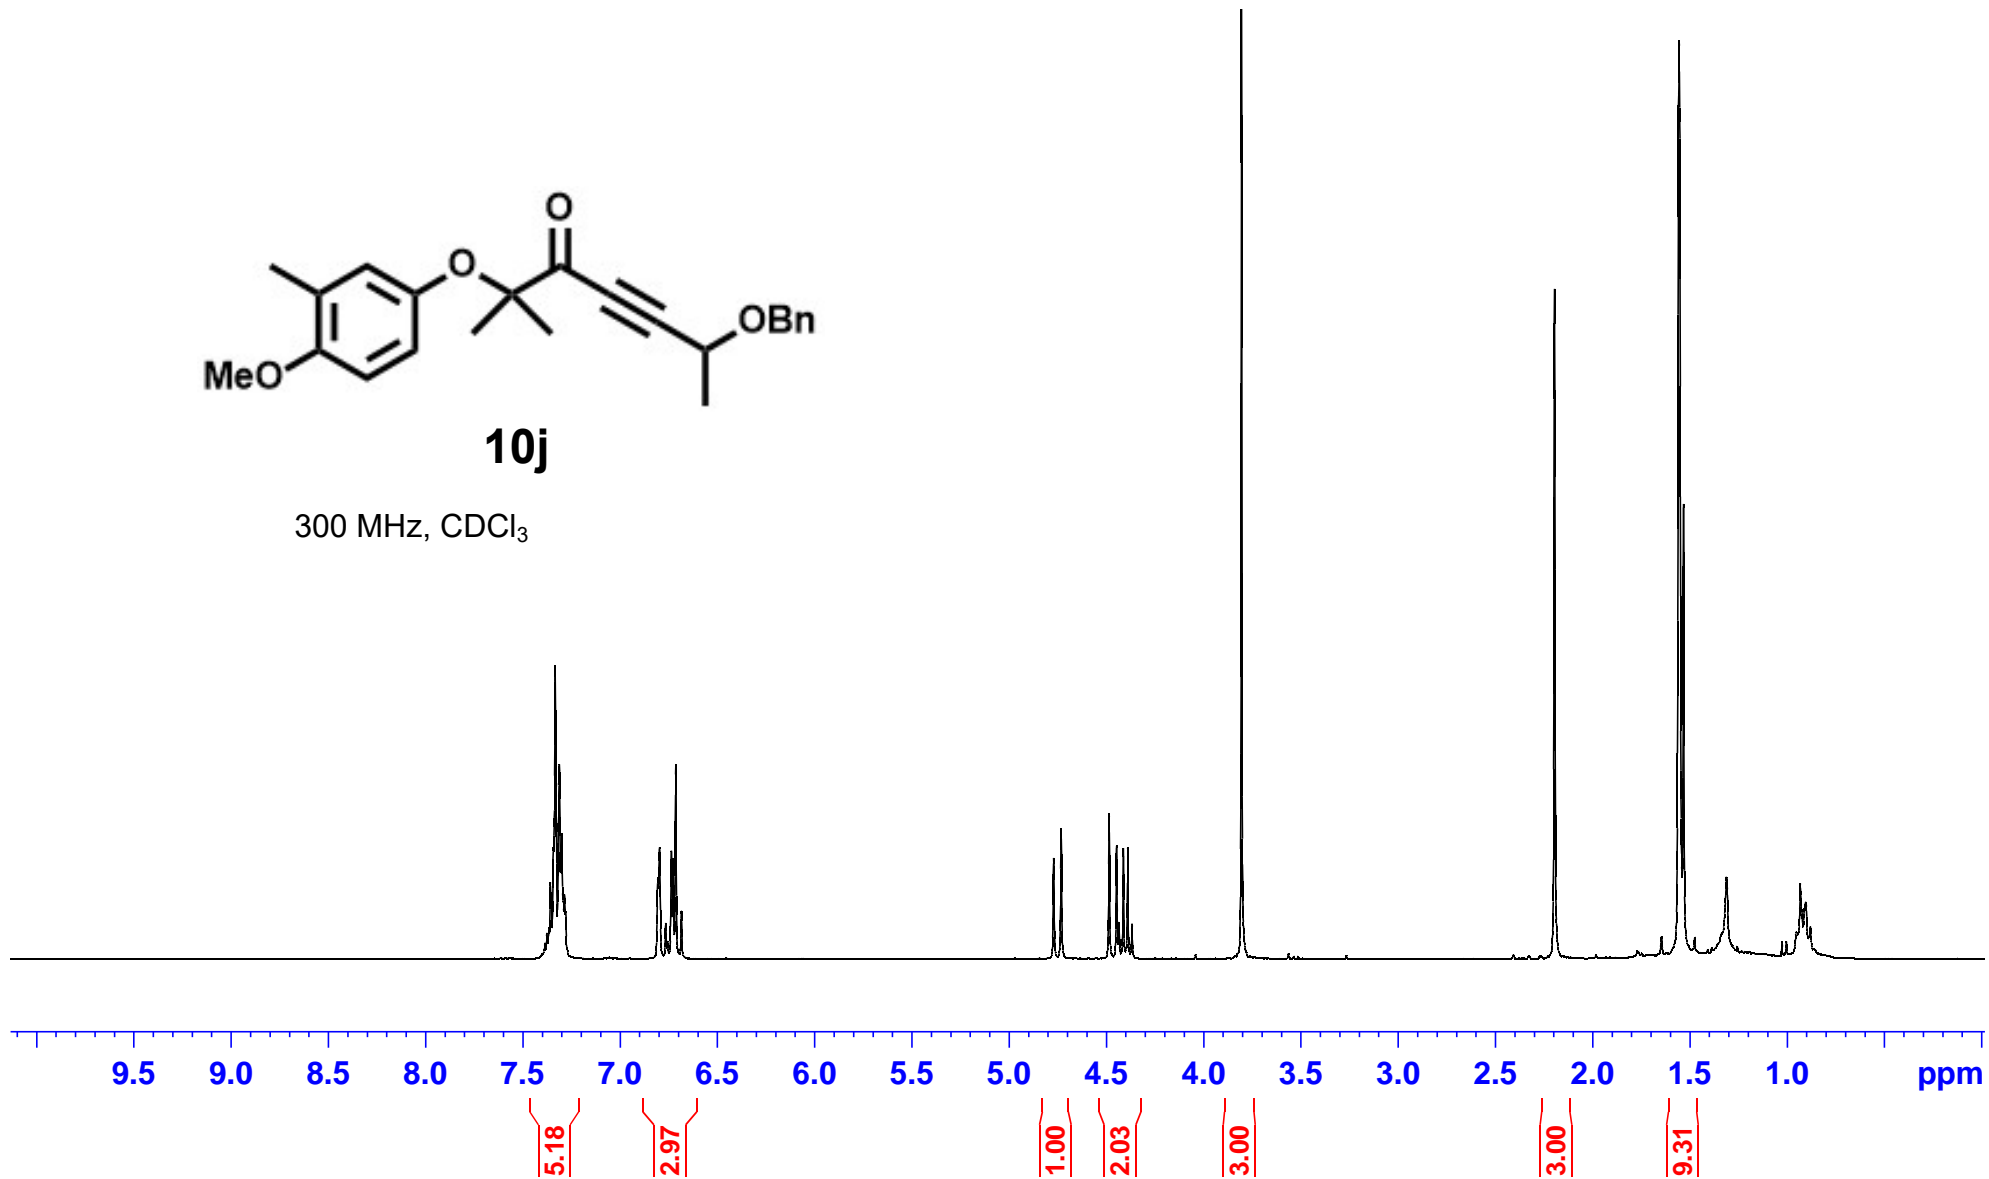

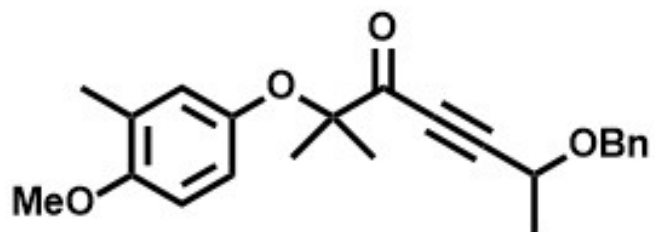

**10j**

75 MHz, CDCl<sub>3</sub>

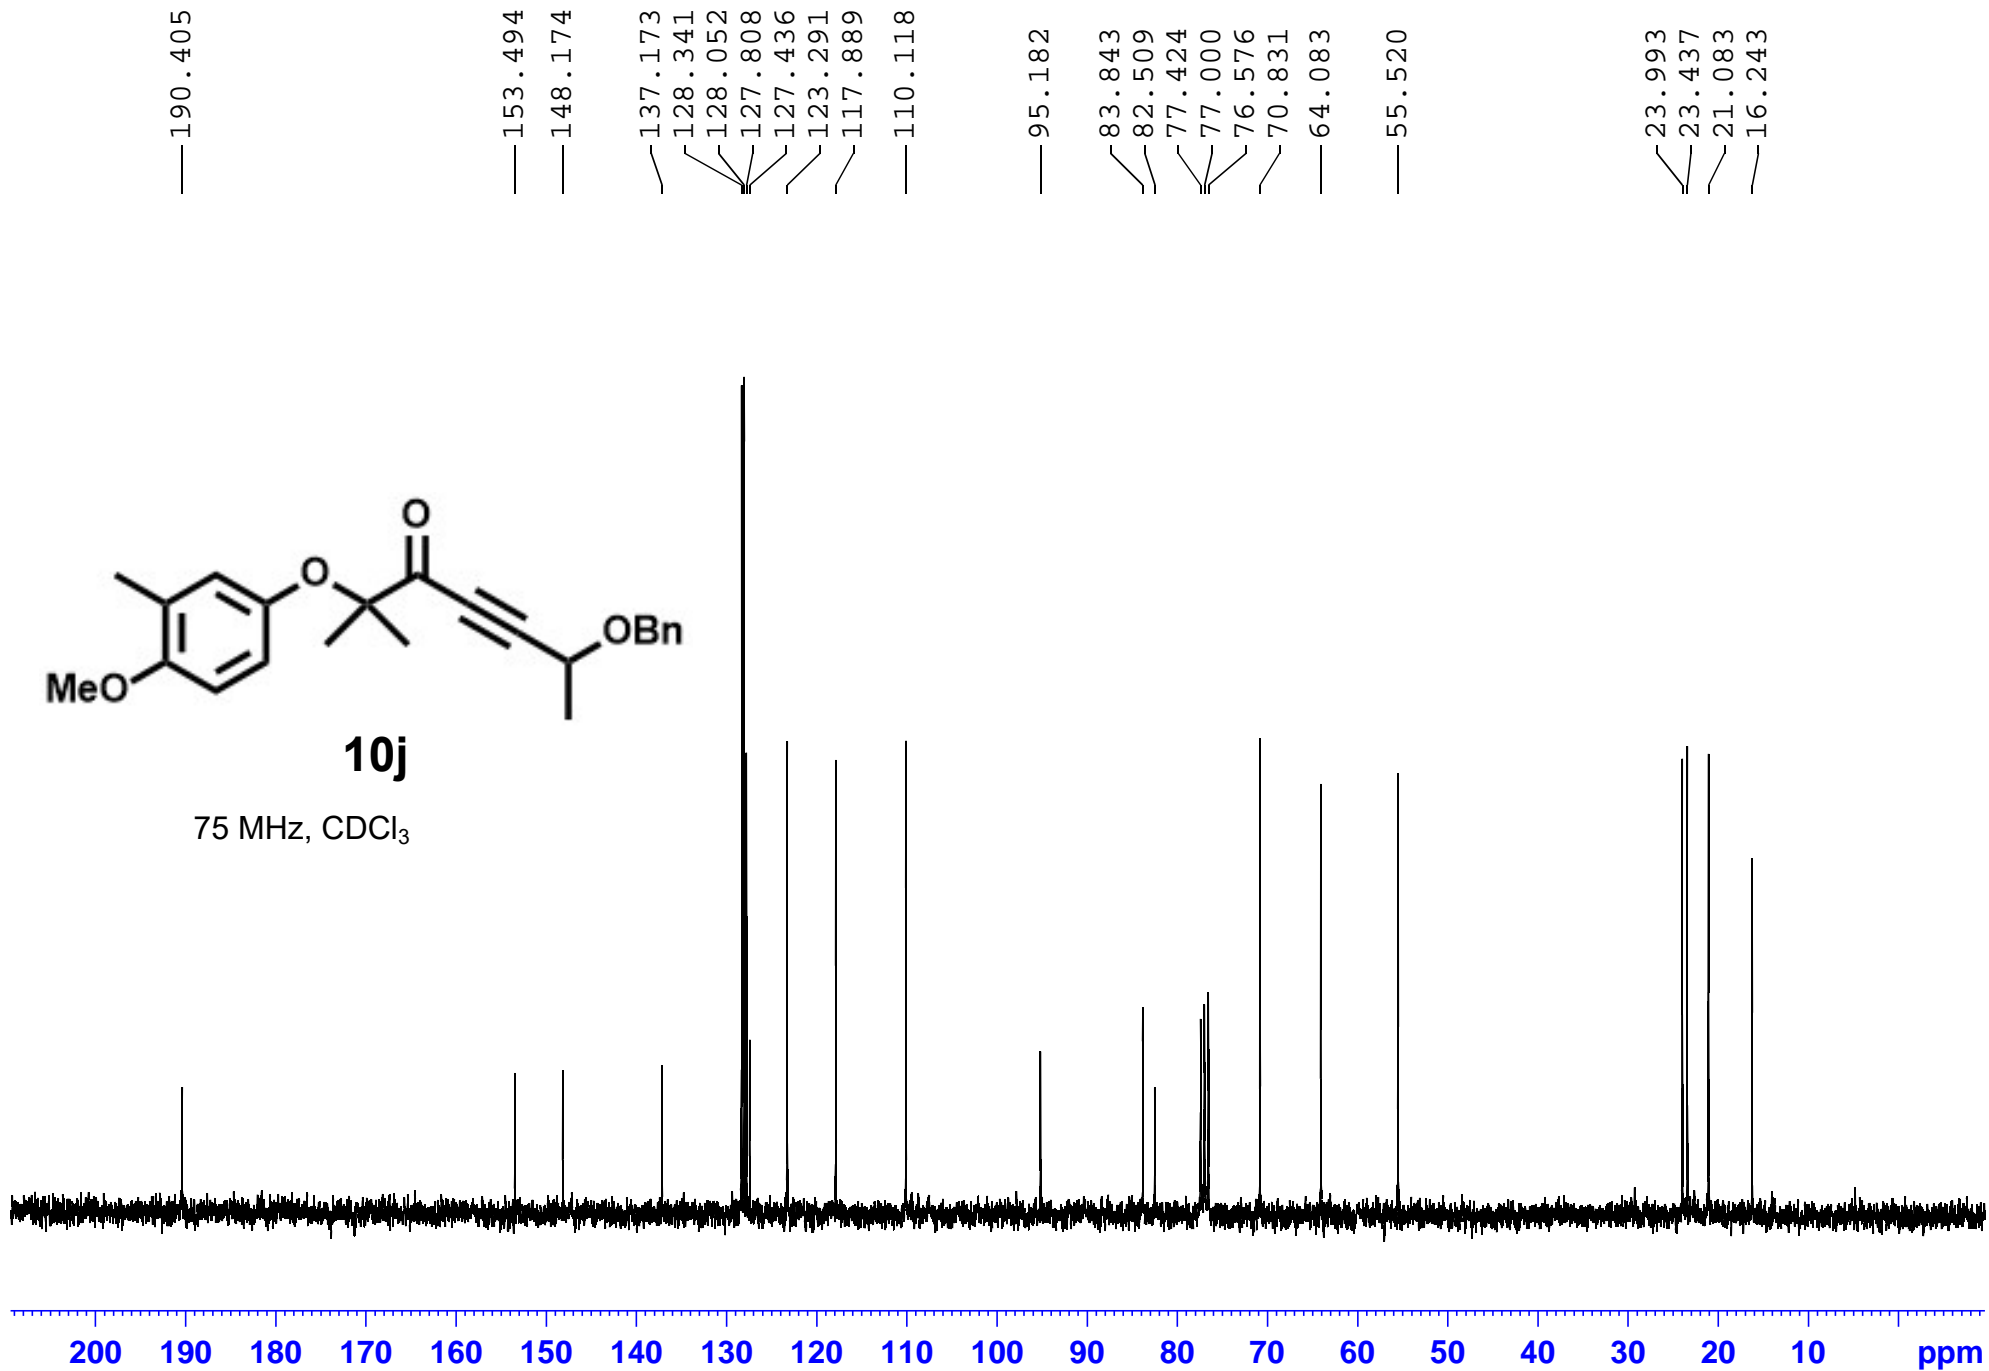

bs0.0604 1, unsubst SM complex, 300B82, 6/4/21

7.301  
7.271  
7.248  
7.082  
7.058  
7.033  
6.893  
6.867

4.401

3.464

1.599

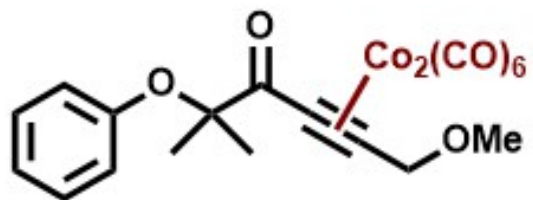

**6a**

300 MHz,  $\text{CDCl}_3$

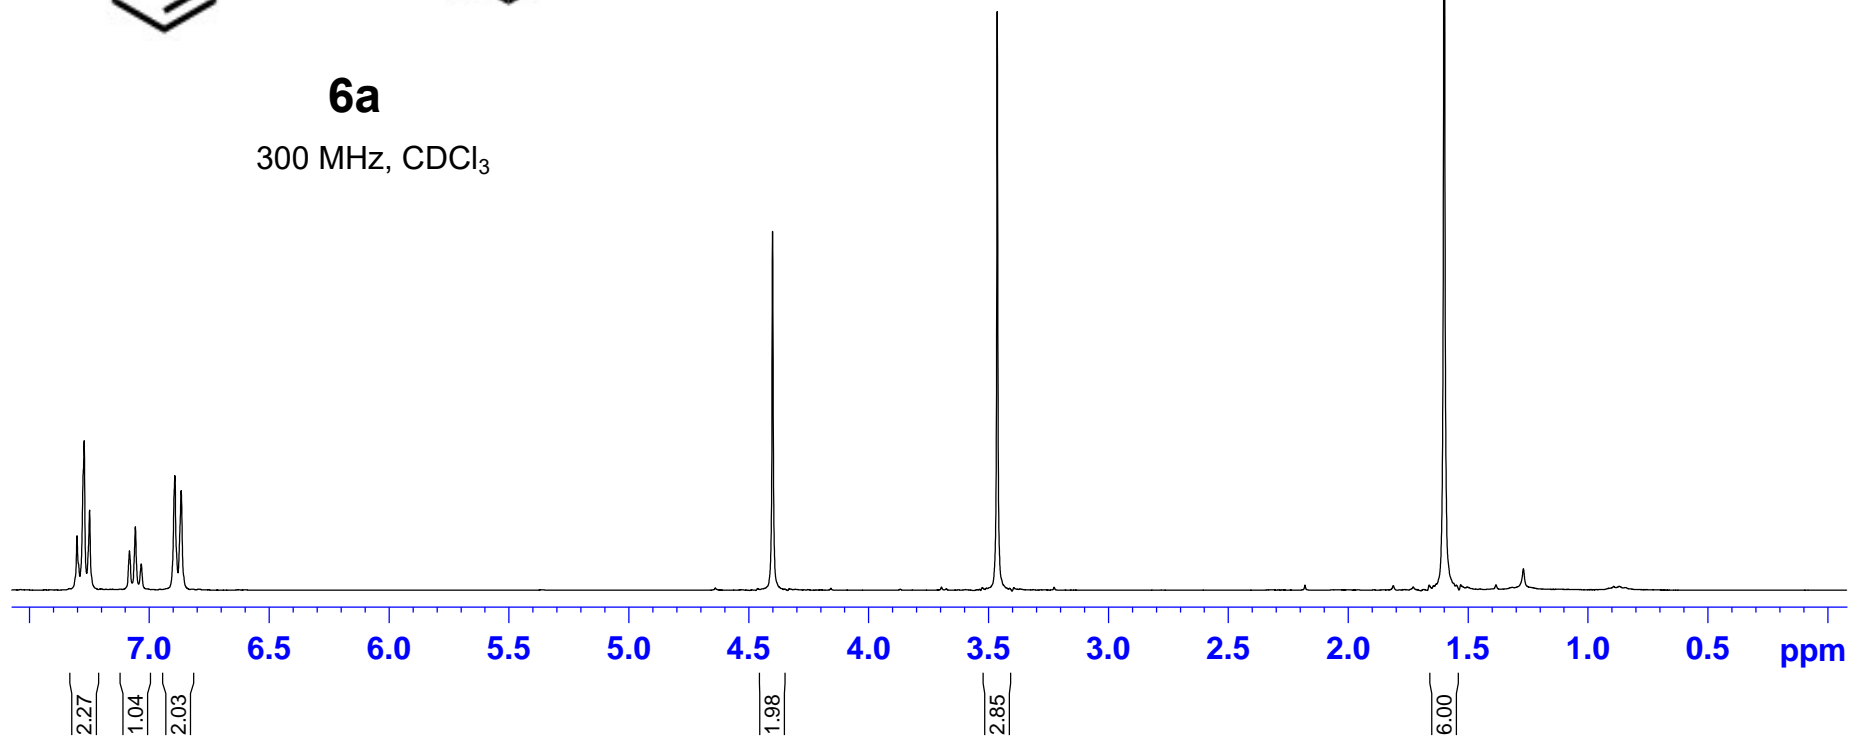

bs0.0604 2 13C, unsubstit complex SM, 6/4/21

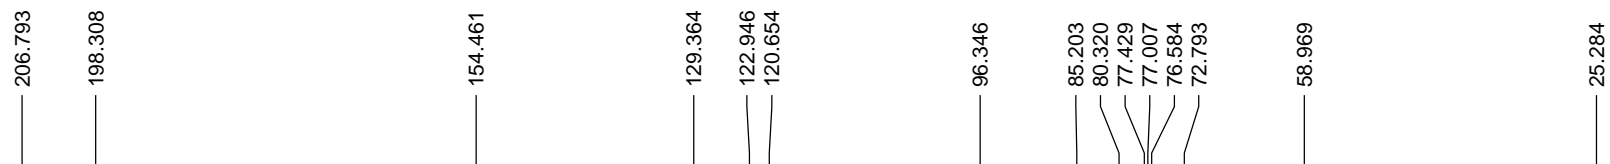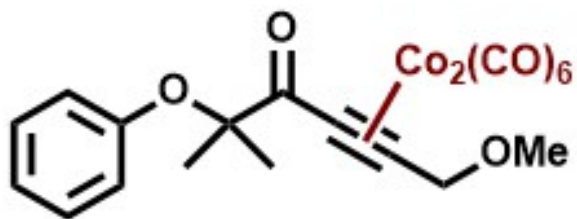

**6a**

300 MHz,  $\text{CDCl}_3$

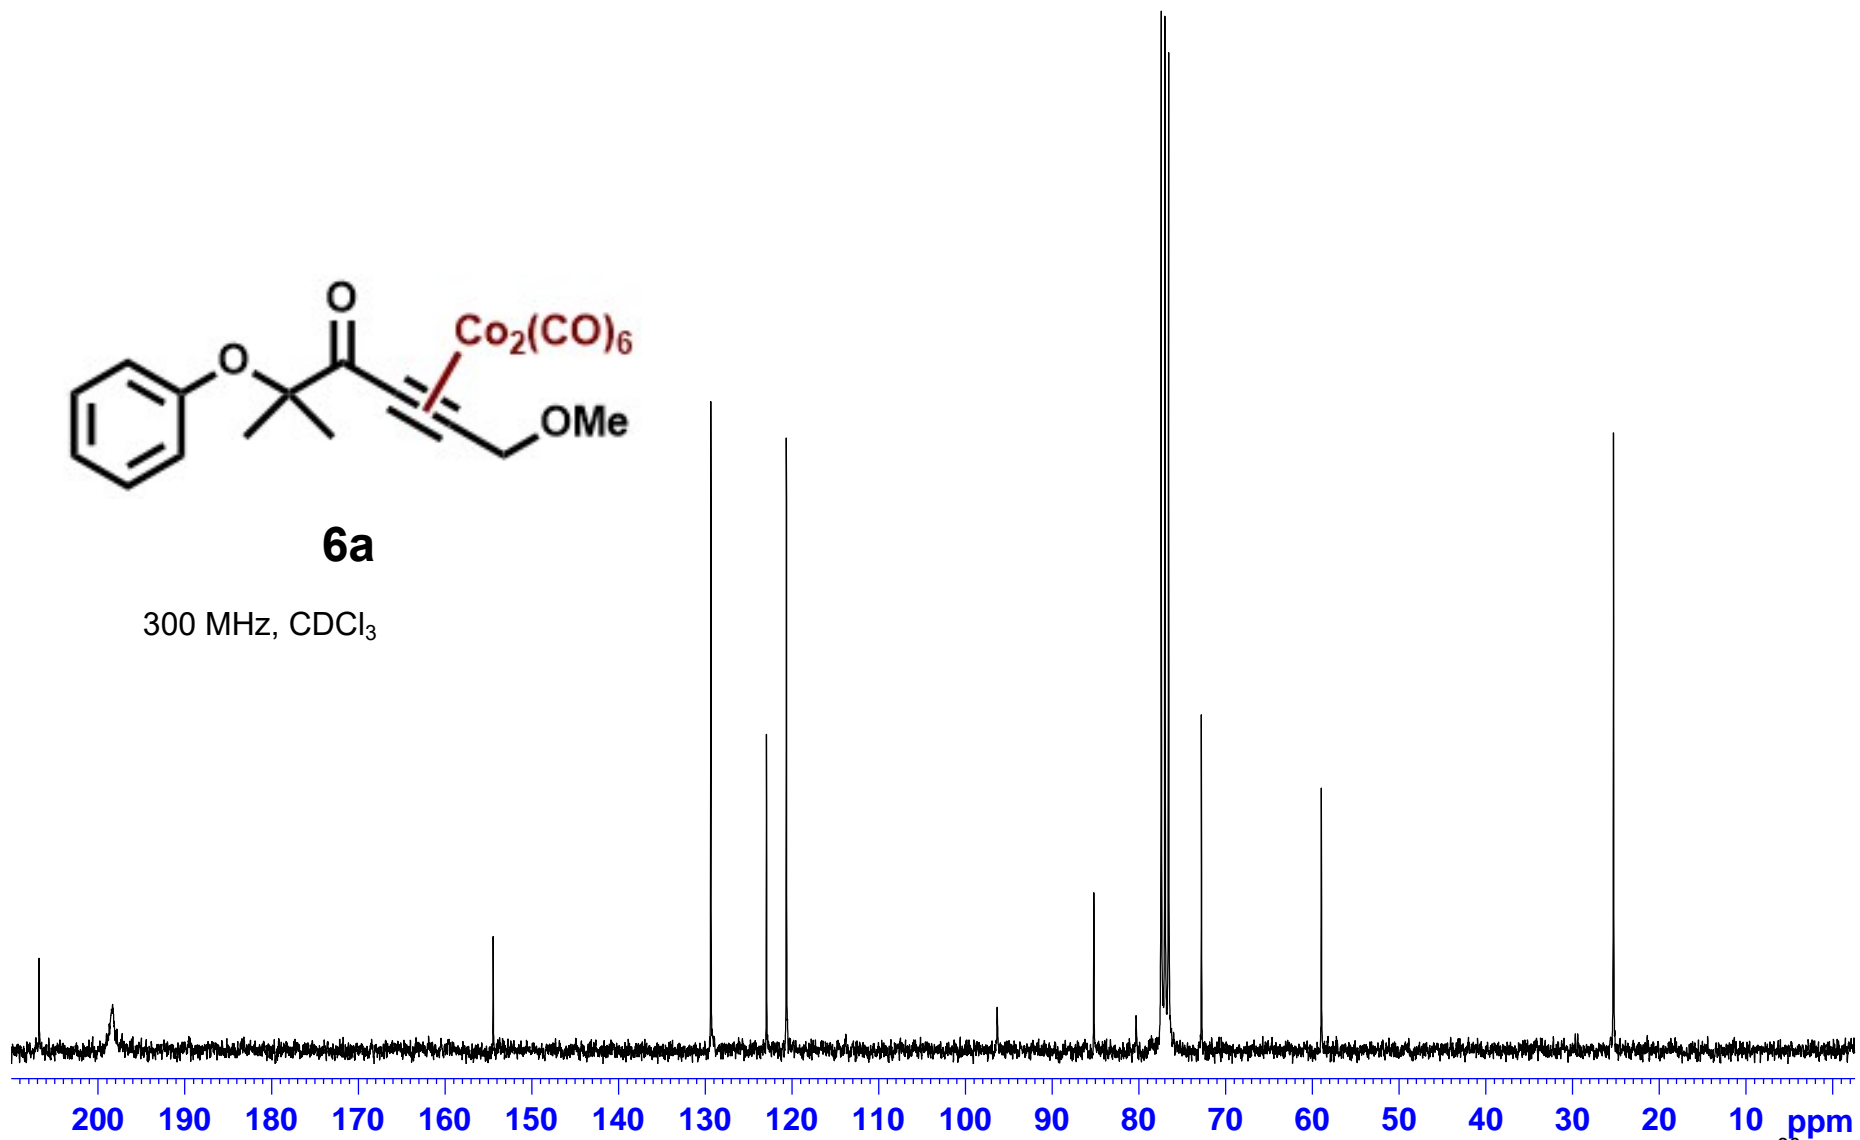



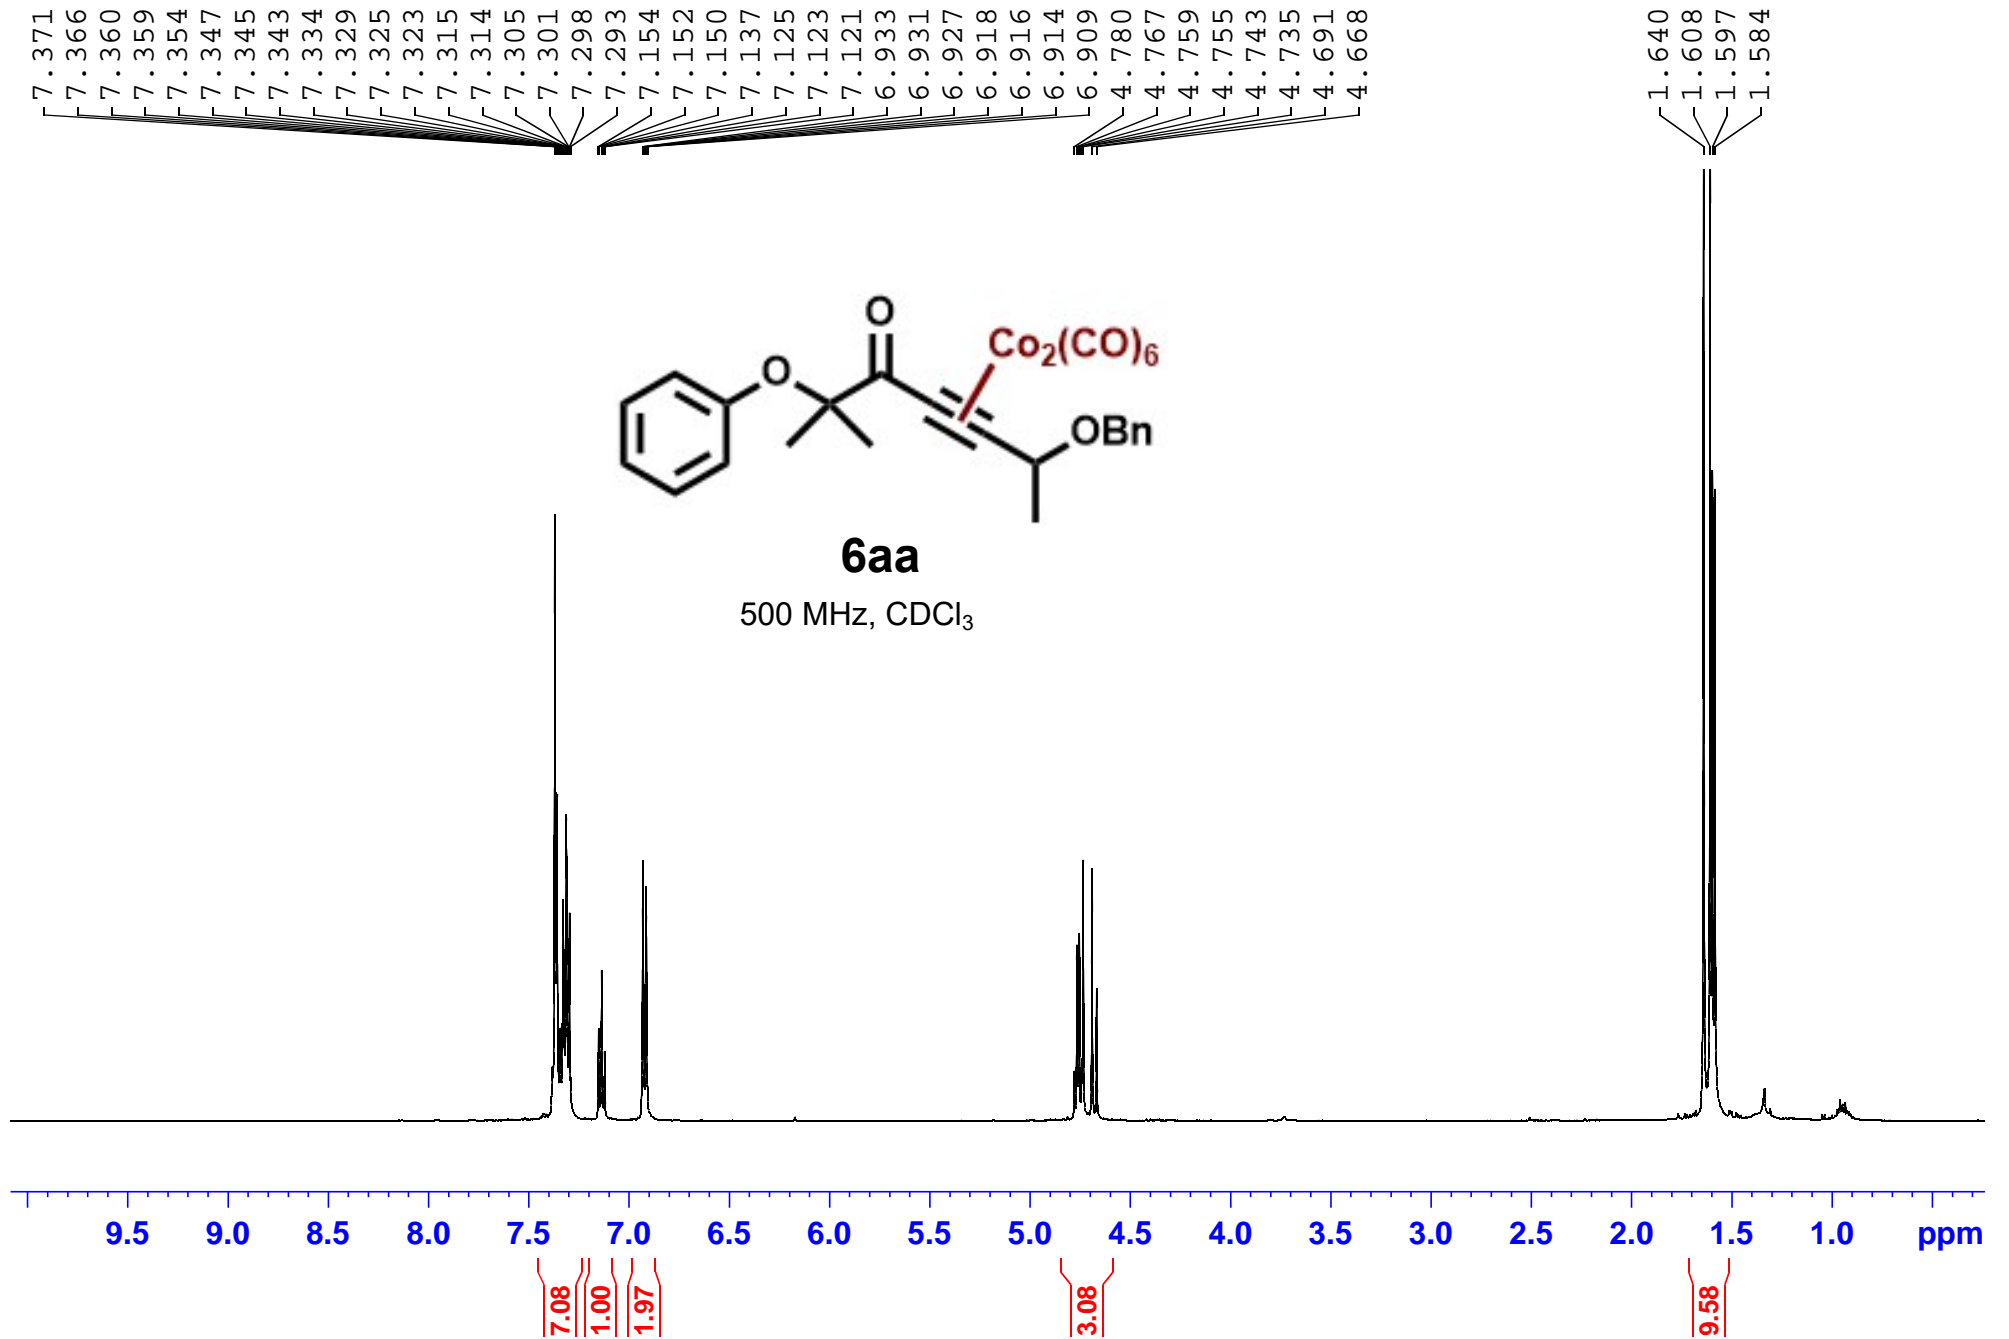

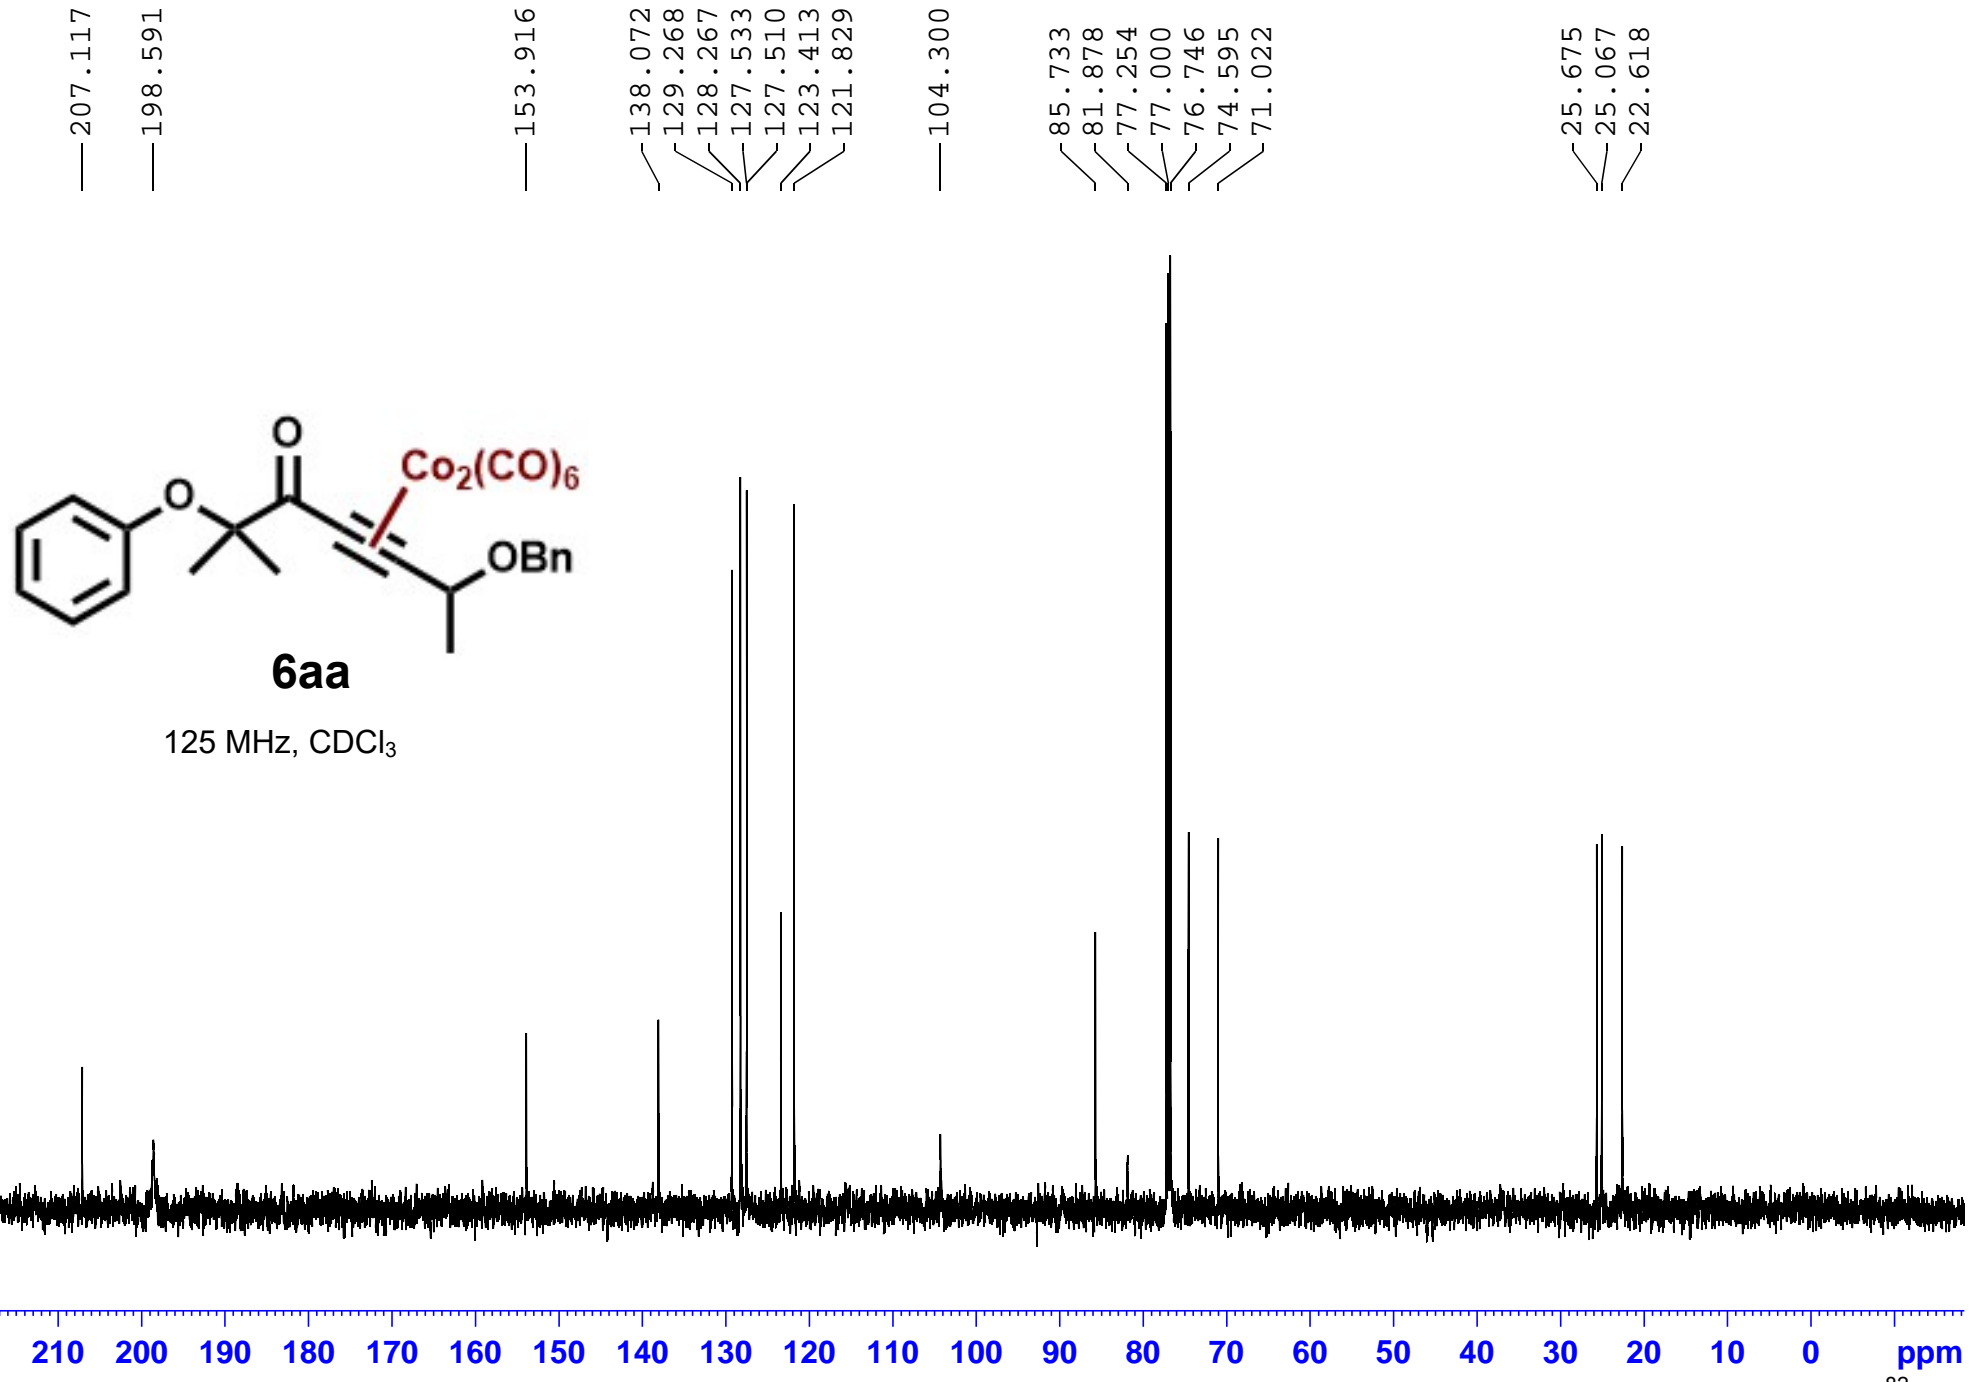

7.270  
7.087  
7.060  
6.799  
6.771

4.457

3.476

2.306

1.559

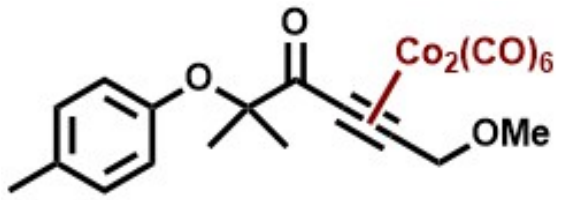

**6b**

300 MHz,  $\text{CDCl}_3$

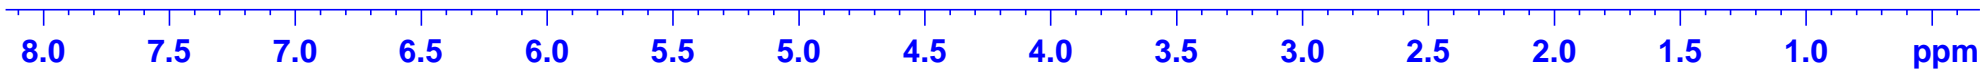

1.94  
1.94

2.00

3.03

3.02

6.10

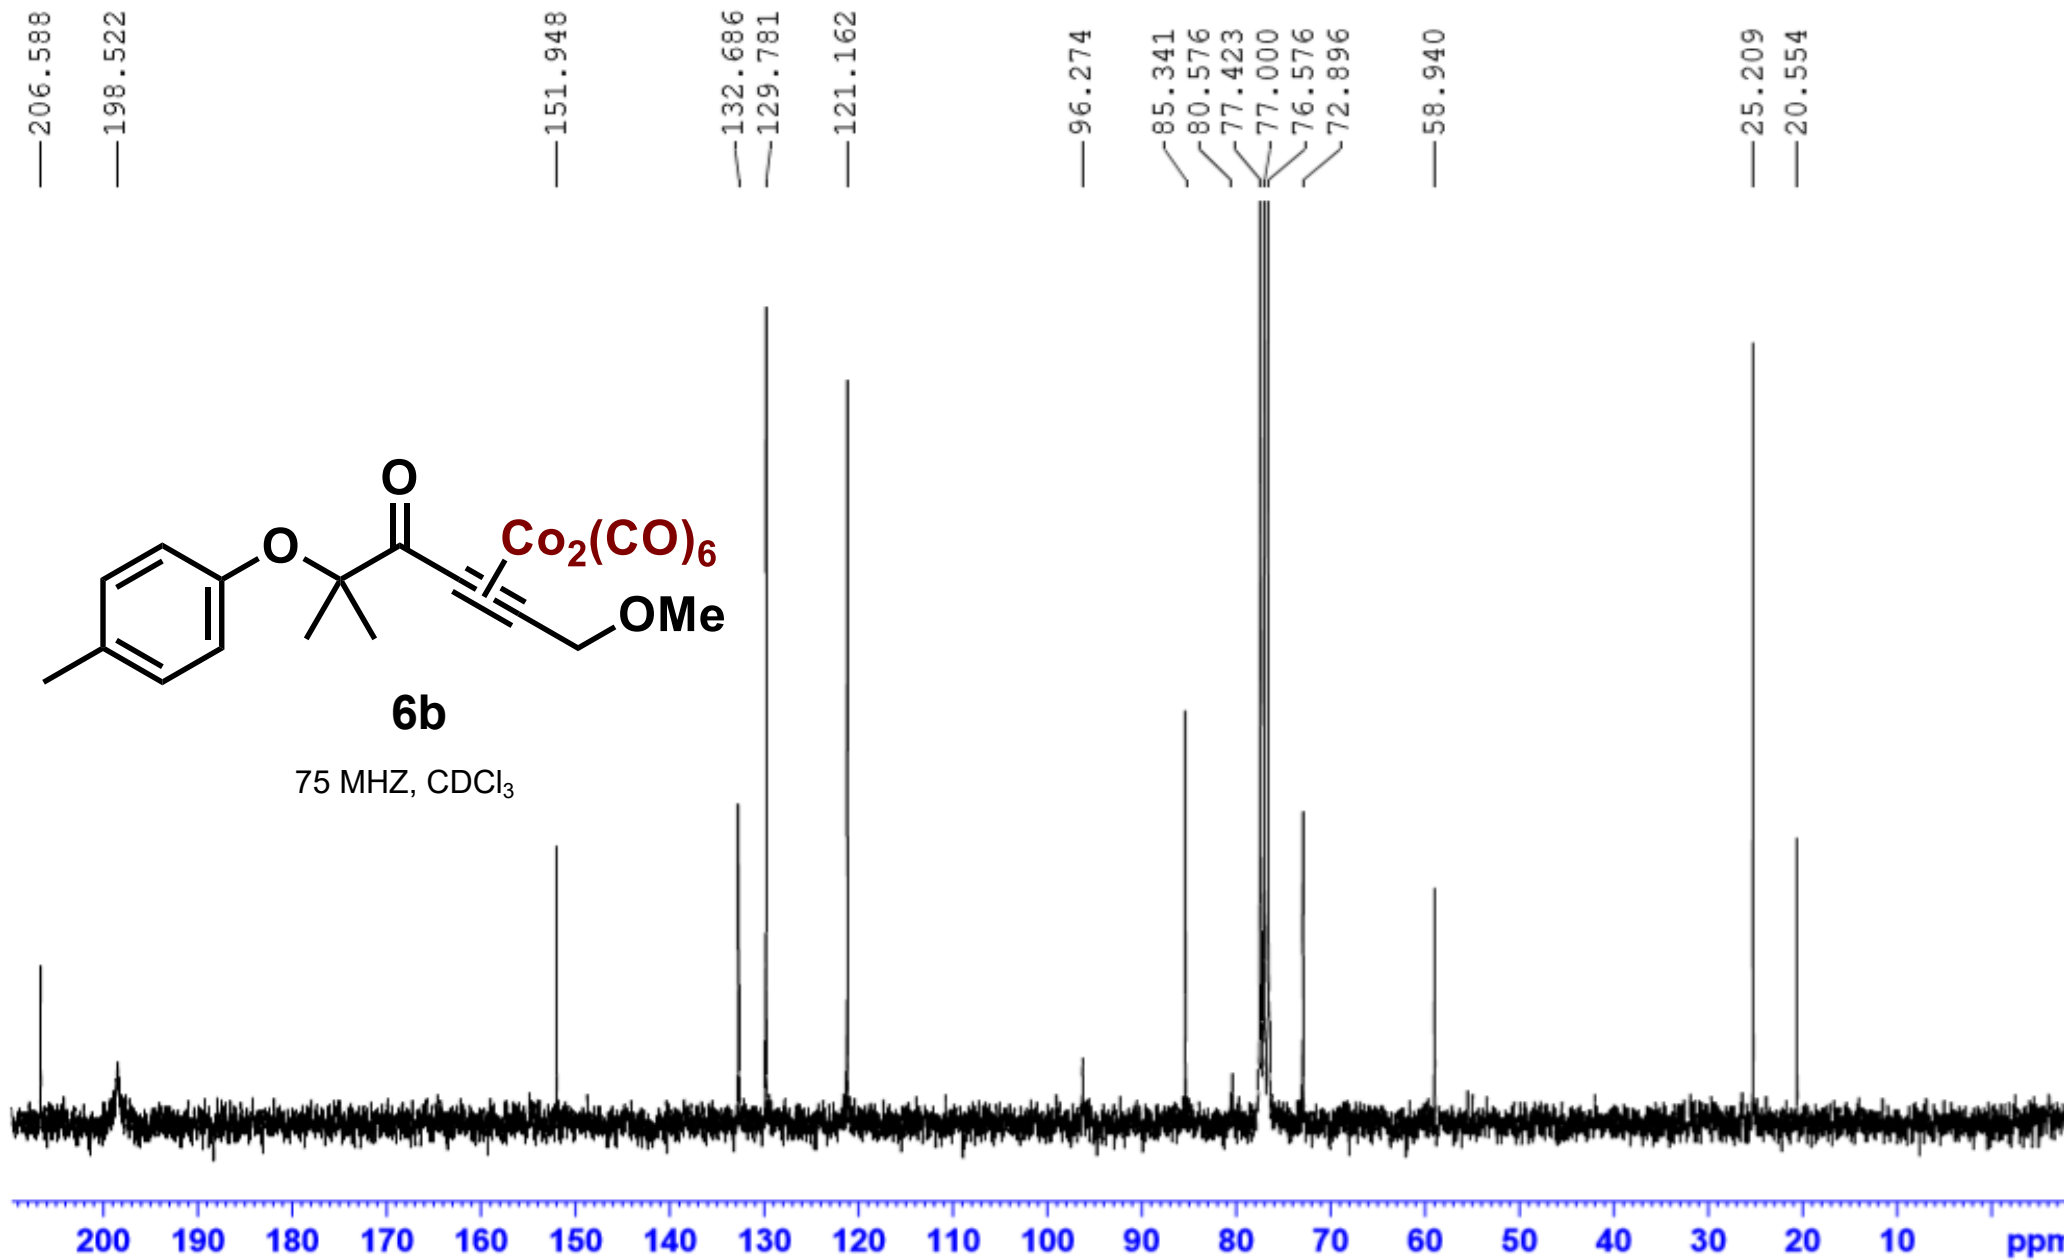

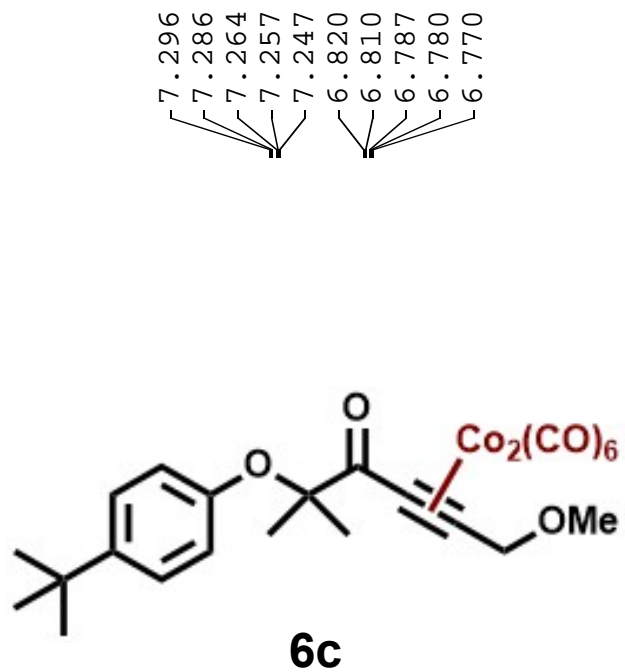

300 MHz,  $\text{CDCl}_3$

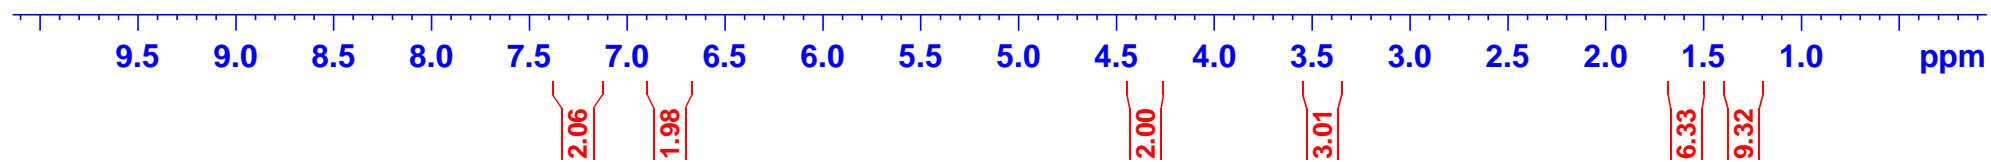

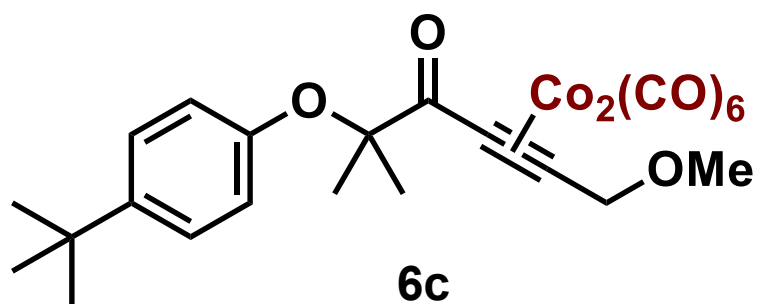

75 MHz, CDCl<sub>3</sub>

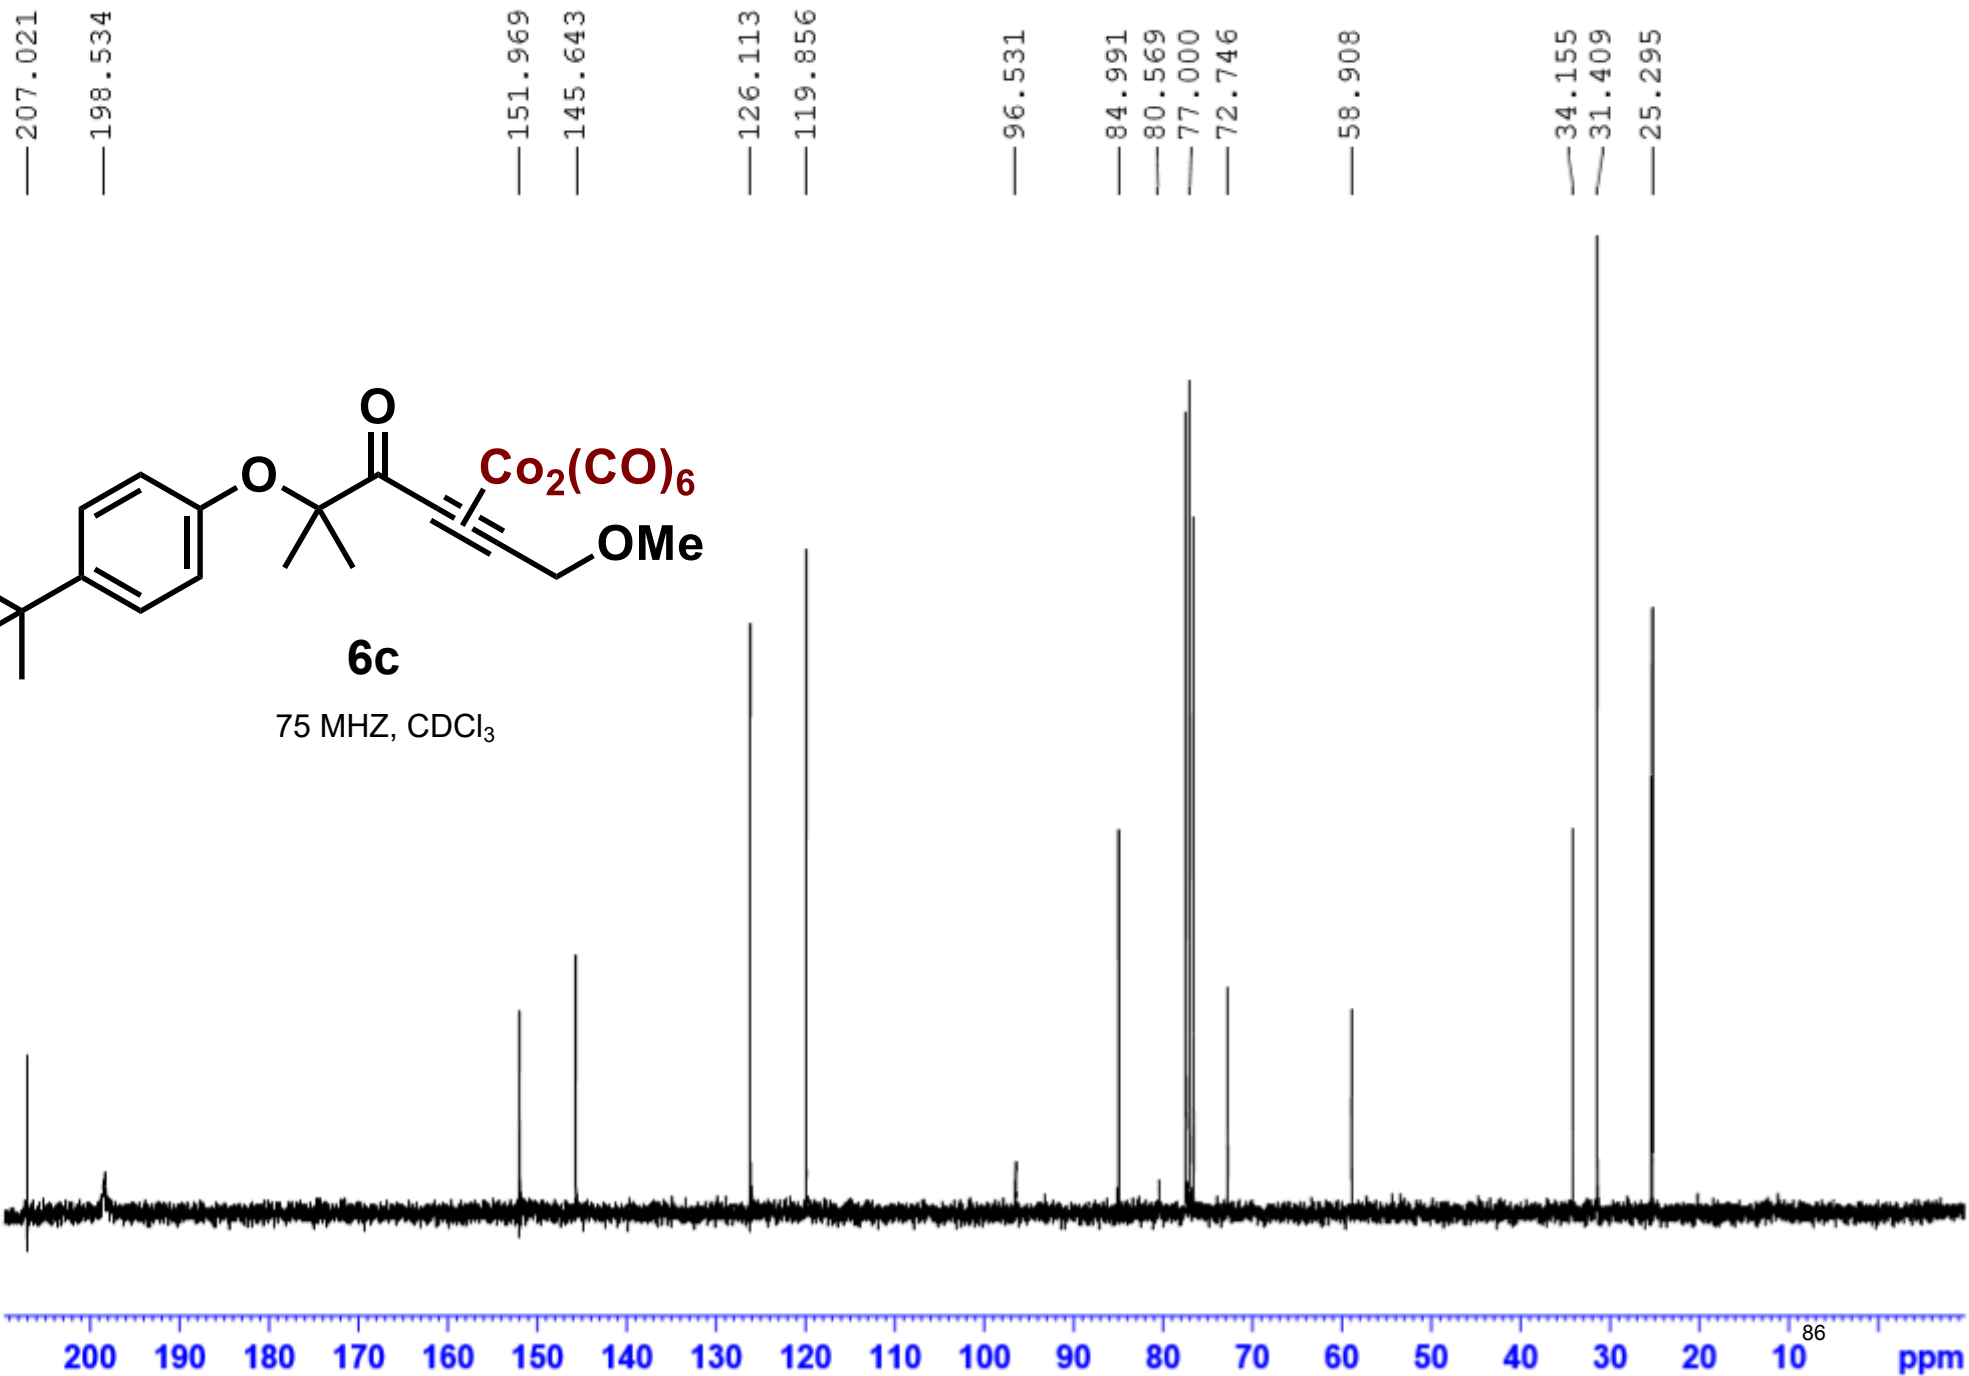

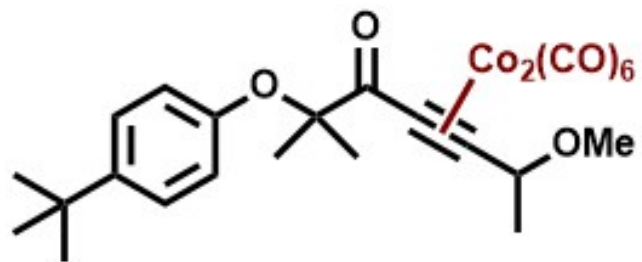

**6cc**

300 MHz, CDCl<sub>3</sub>

7.293  
7.270  
7.264  
6.846  
6.817

4.480  
4.459  
4.439  
4.418

3.440

1.584  
1.562  
1.487  
1.466  
1.298

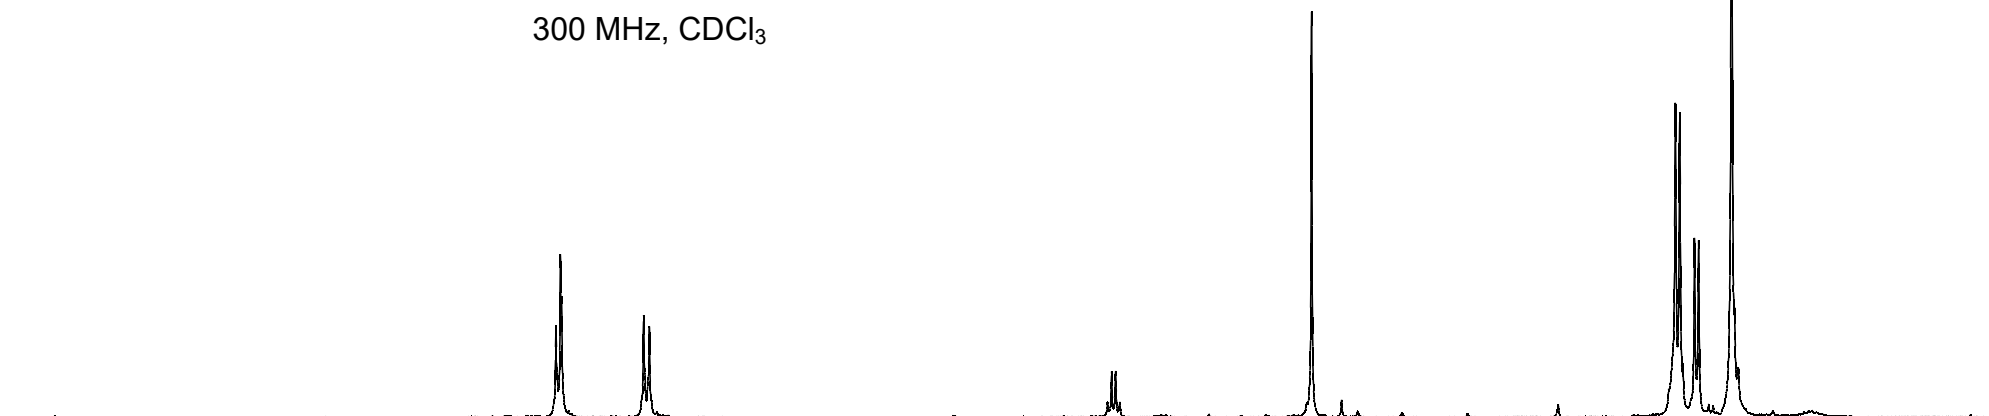

9.5

9.0

8.5

8.0

7.5

7.0

6.5

6.0

5.5

5.0

4.5

4.0

3.5

3.0

2.5

2.0

1.5

1.0

ppm

3.12

2.00

1.10

3.22

7.57

2.91

10.86

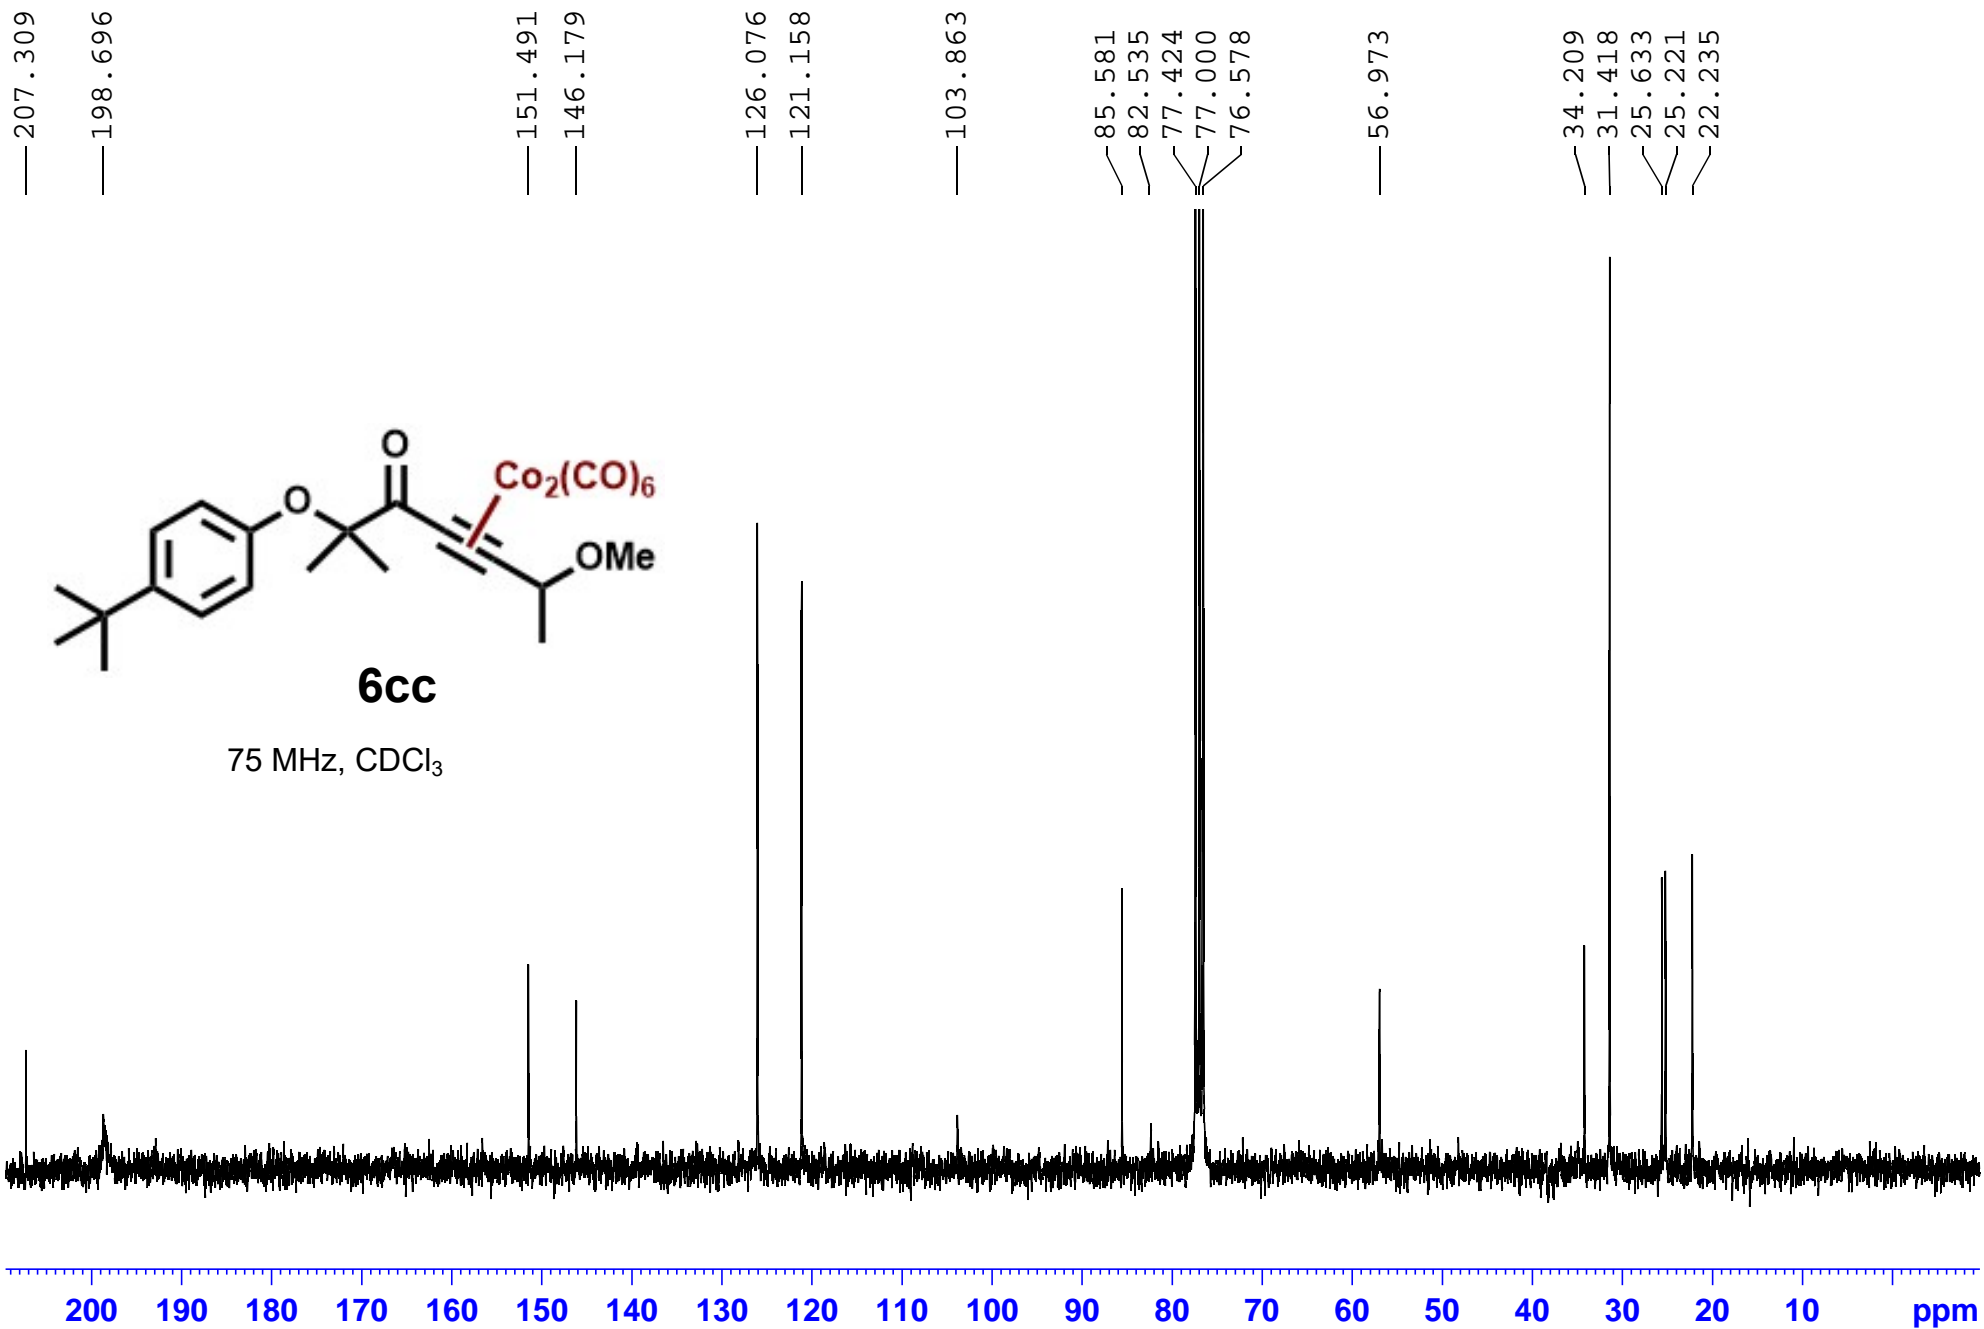



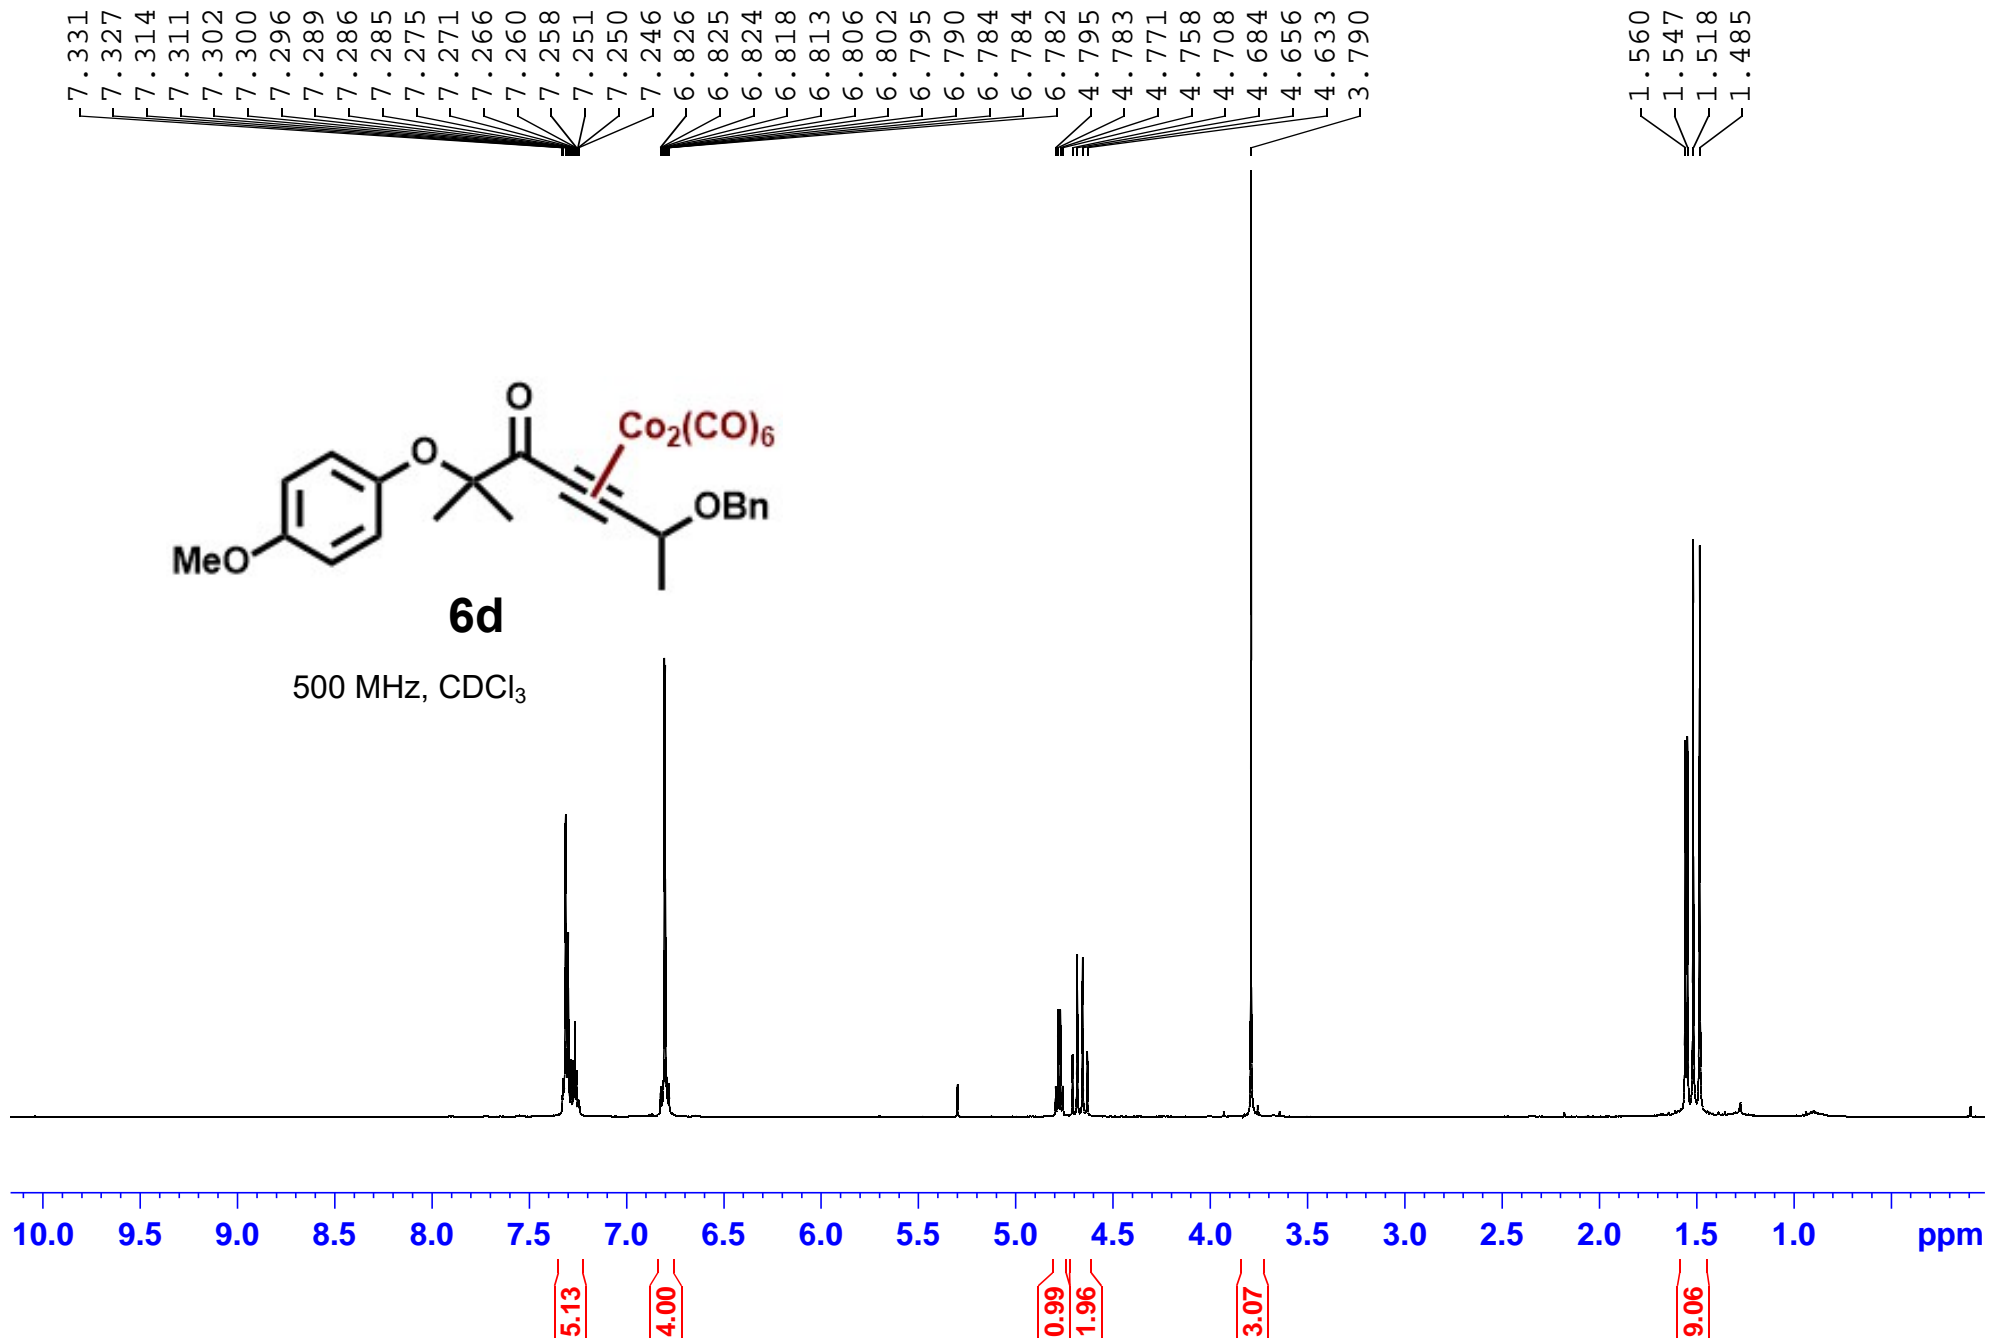

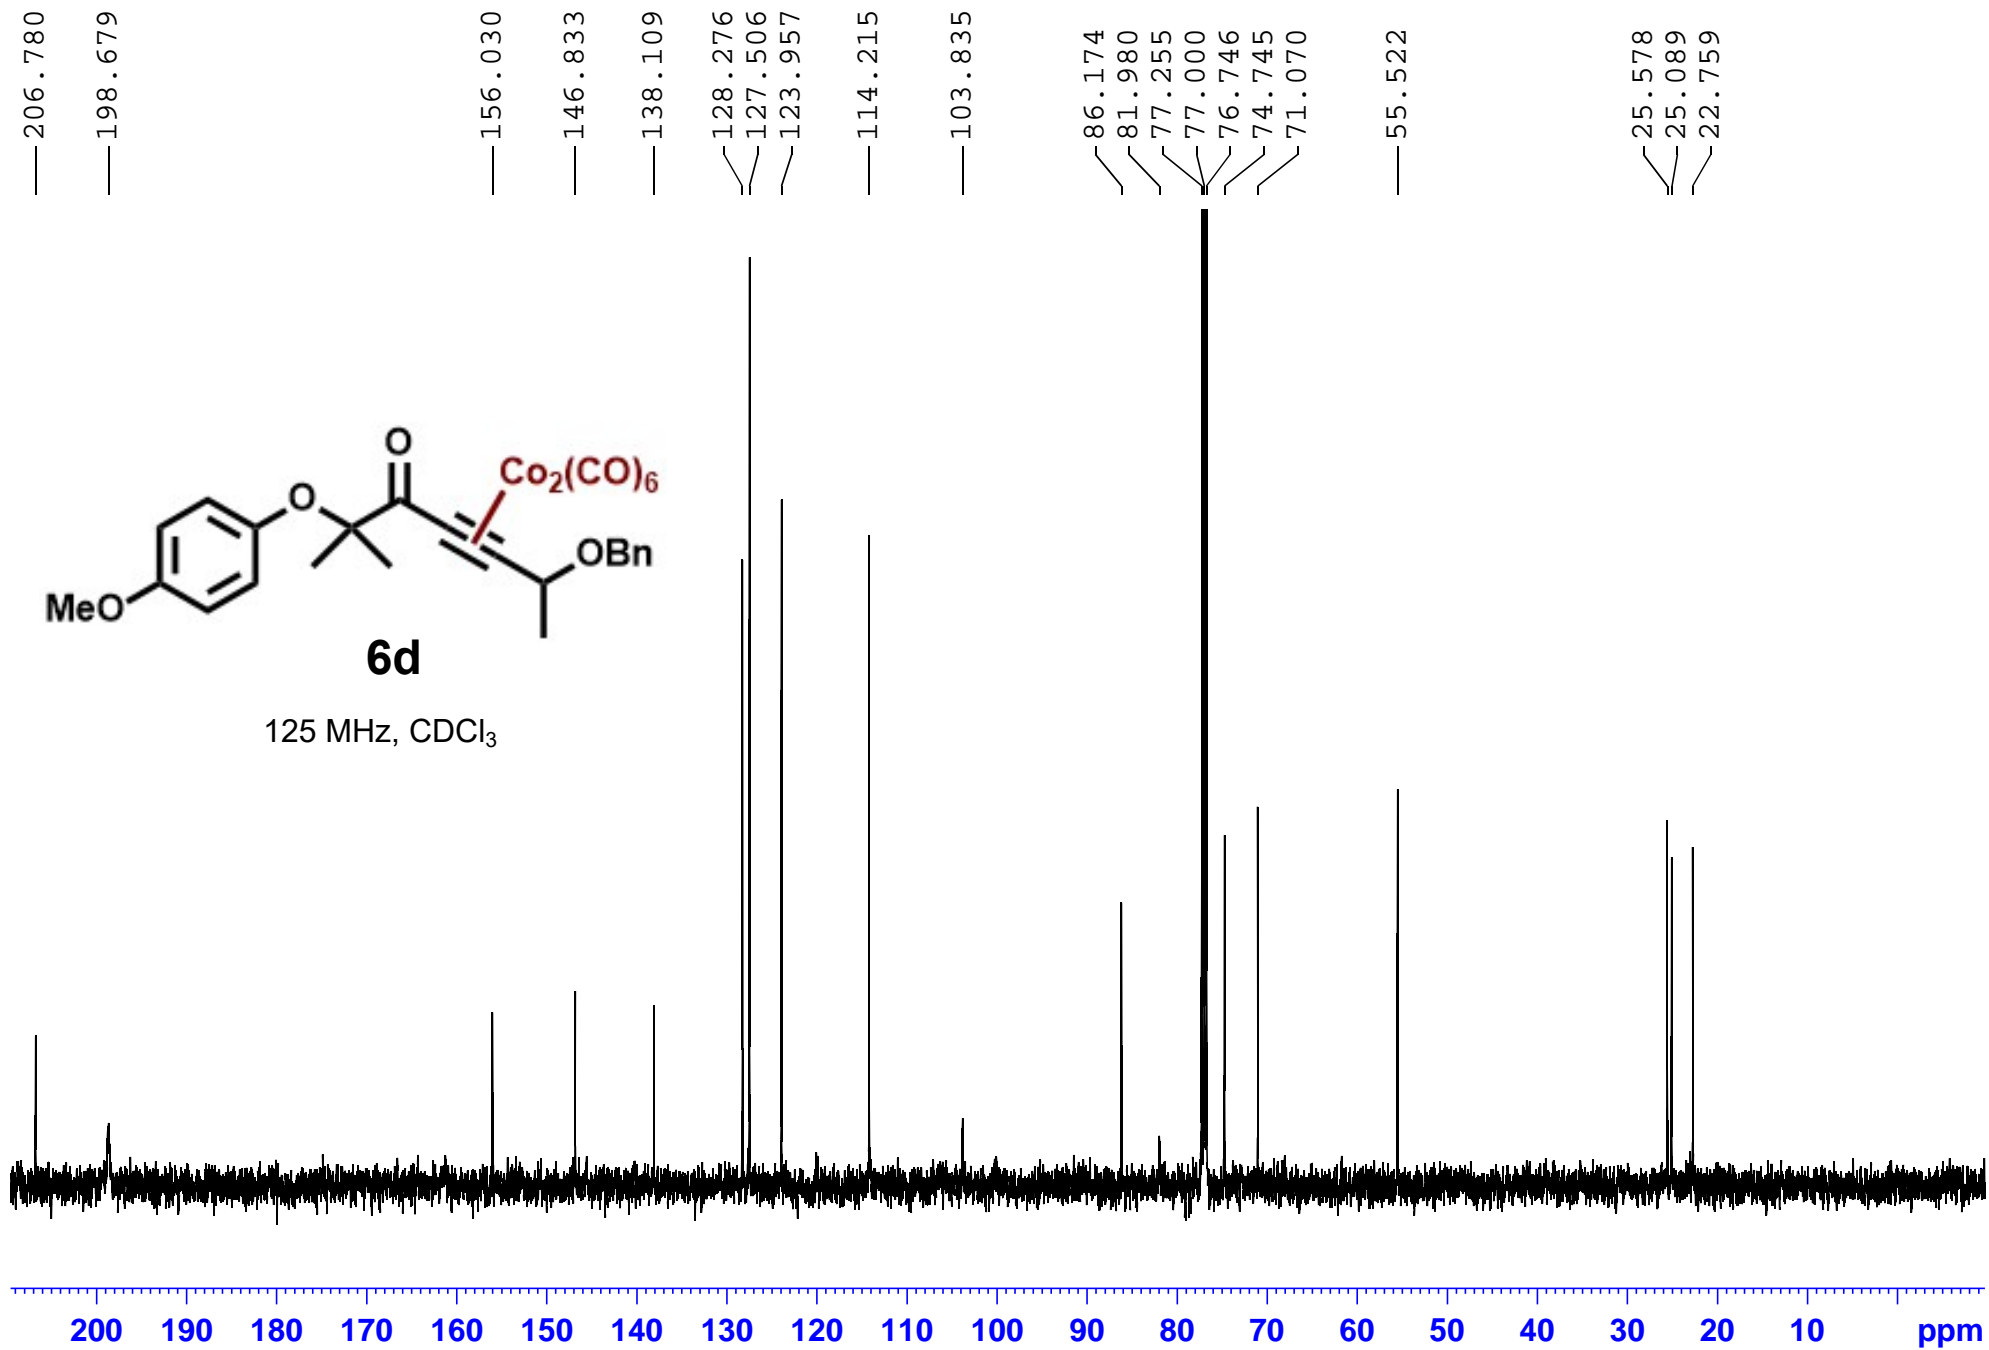

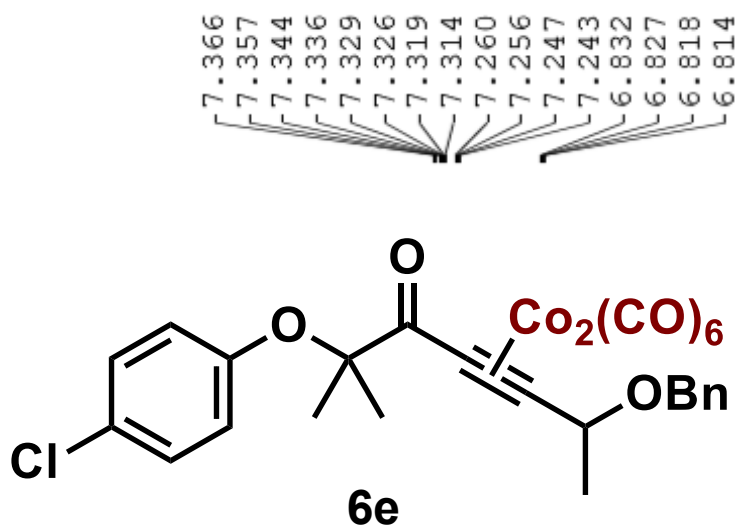

500 MHz, CDCl<sub>3</sub>

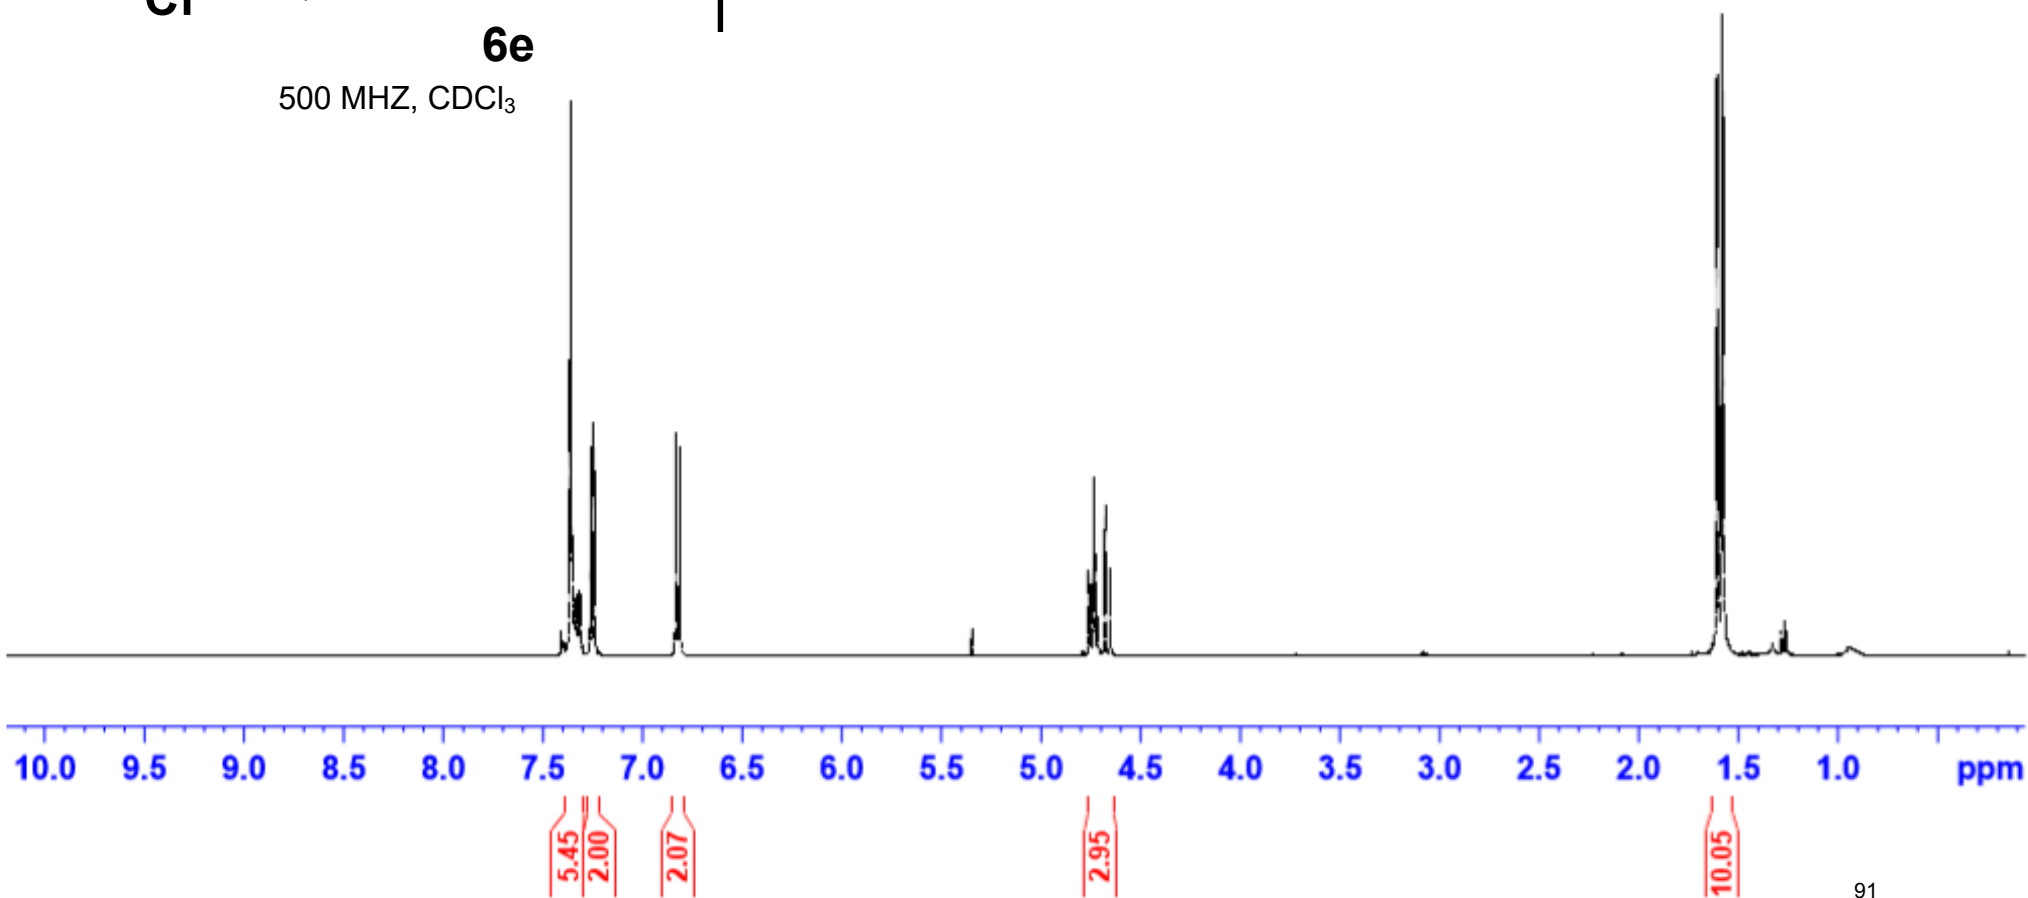

—206.620

—198.518

—152.453

137.963

129.297

128.751

128.306

127.585

127.545

123.136

—104.269

86.123

81.455

77.254

77.000

76.746

74.413

70.965

25.511

24.941

22.520

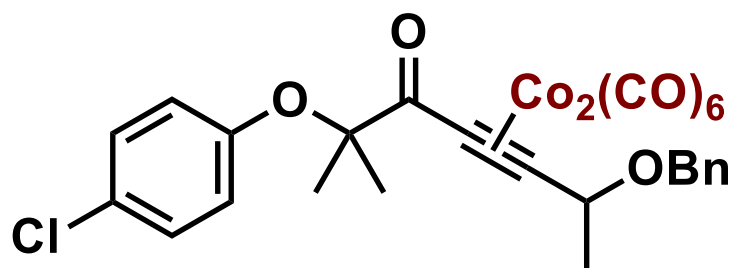

**6e**

125 MHz,  $\text{CDCl}_3$

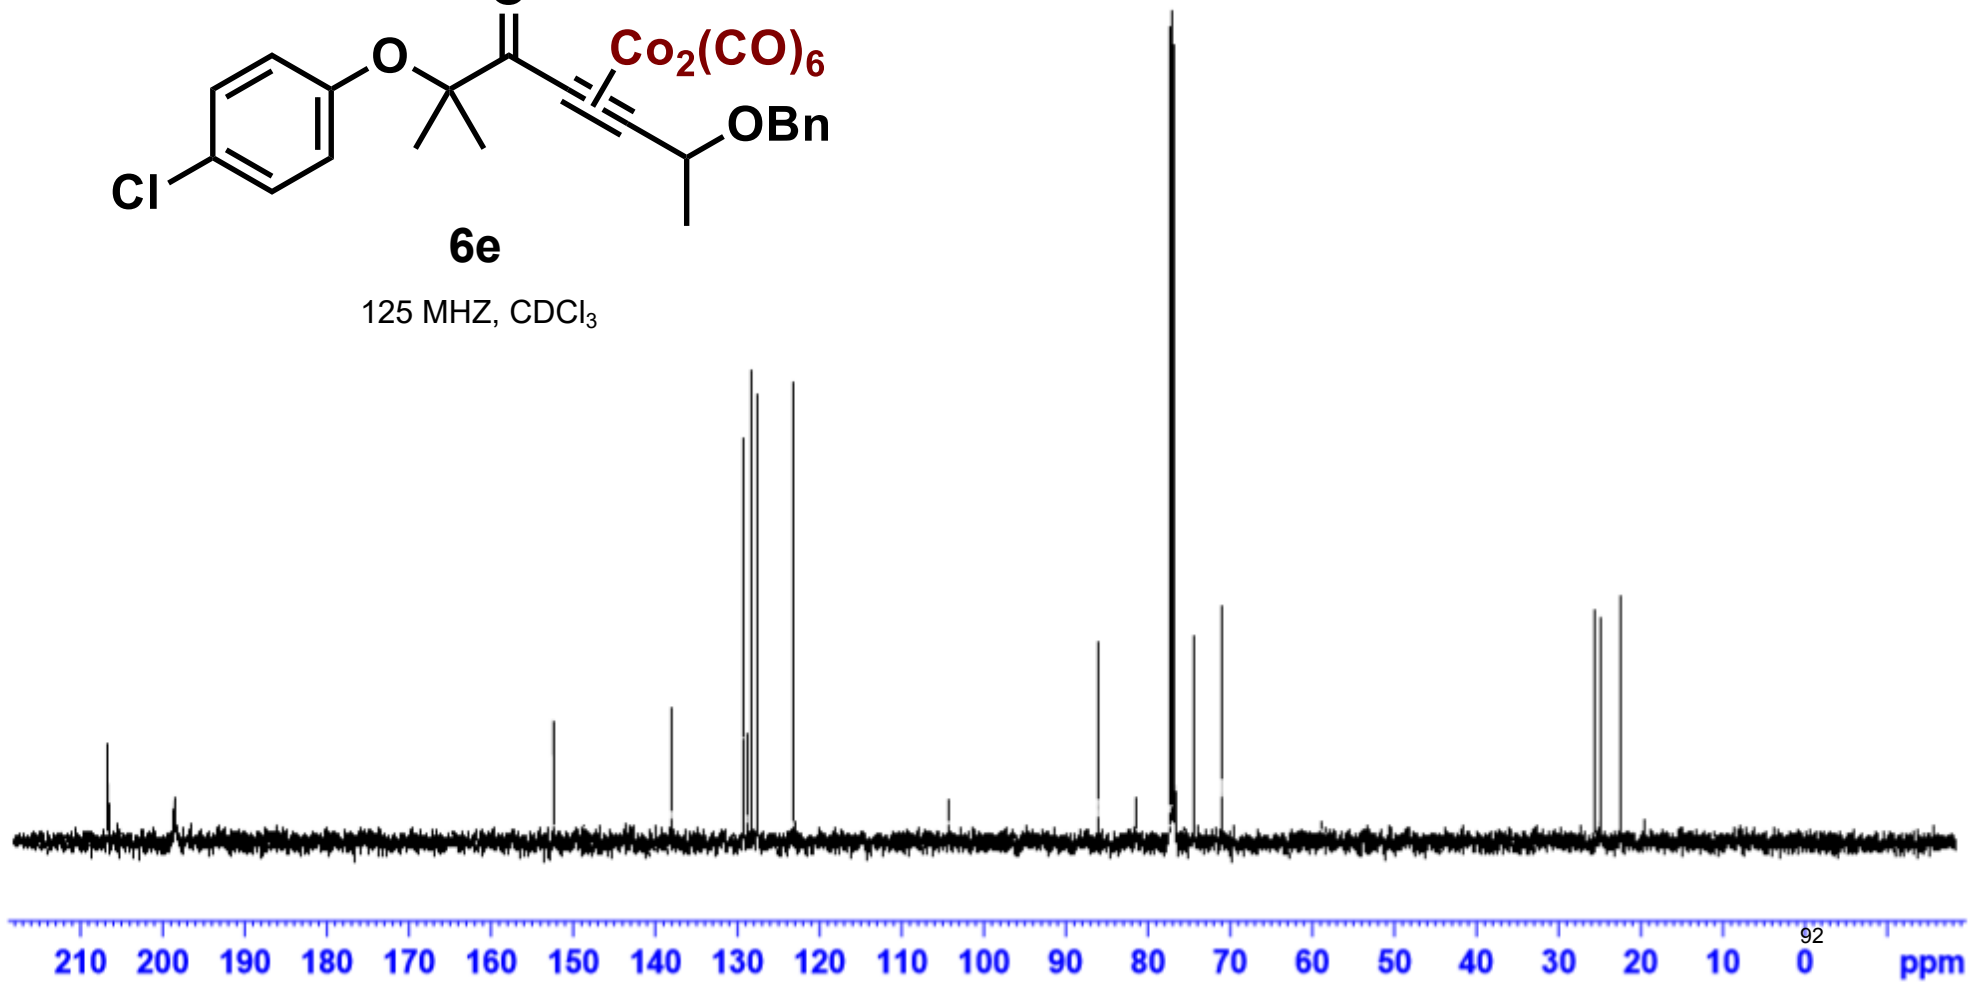

bs0.0608 1 m-Me propargyl Me SM complex, 6/8/21

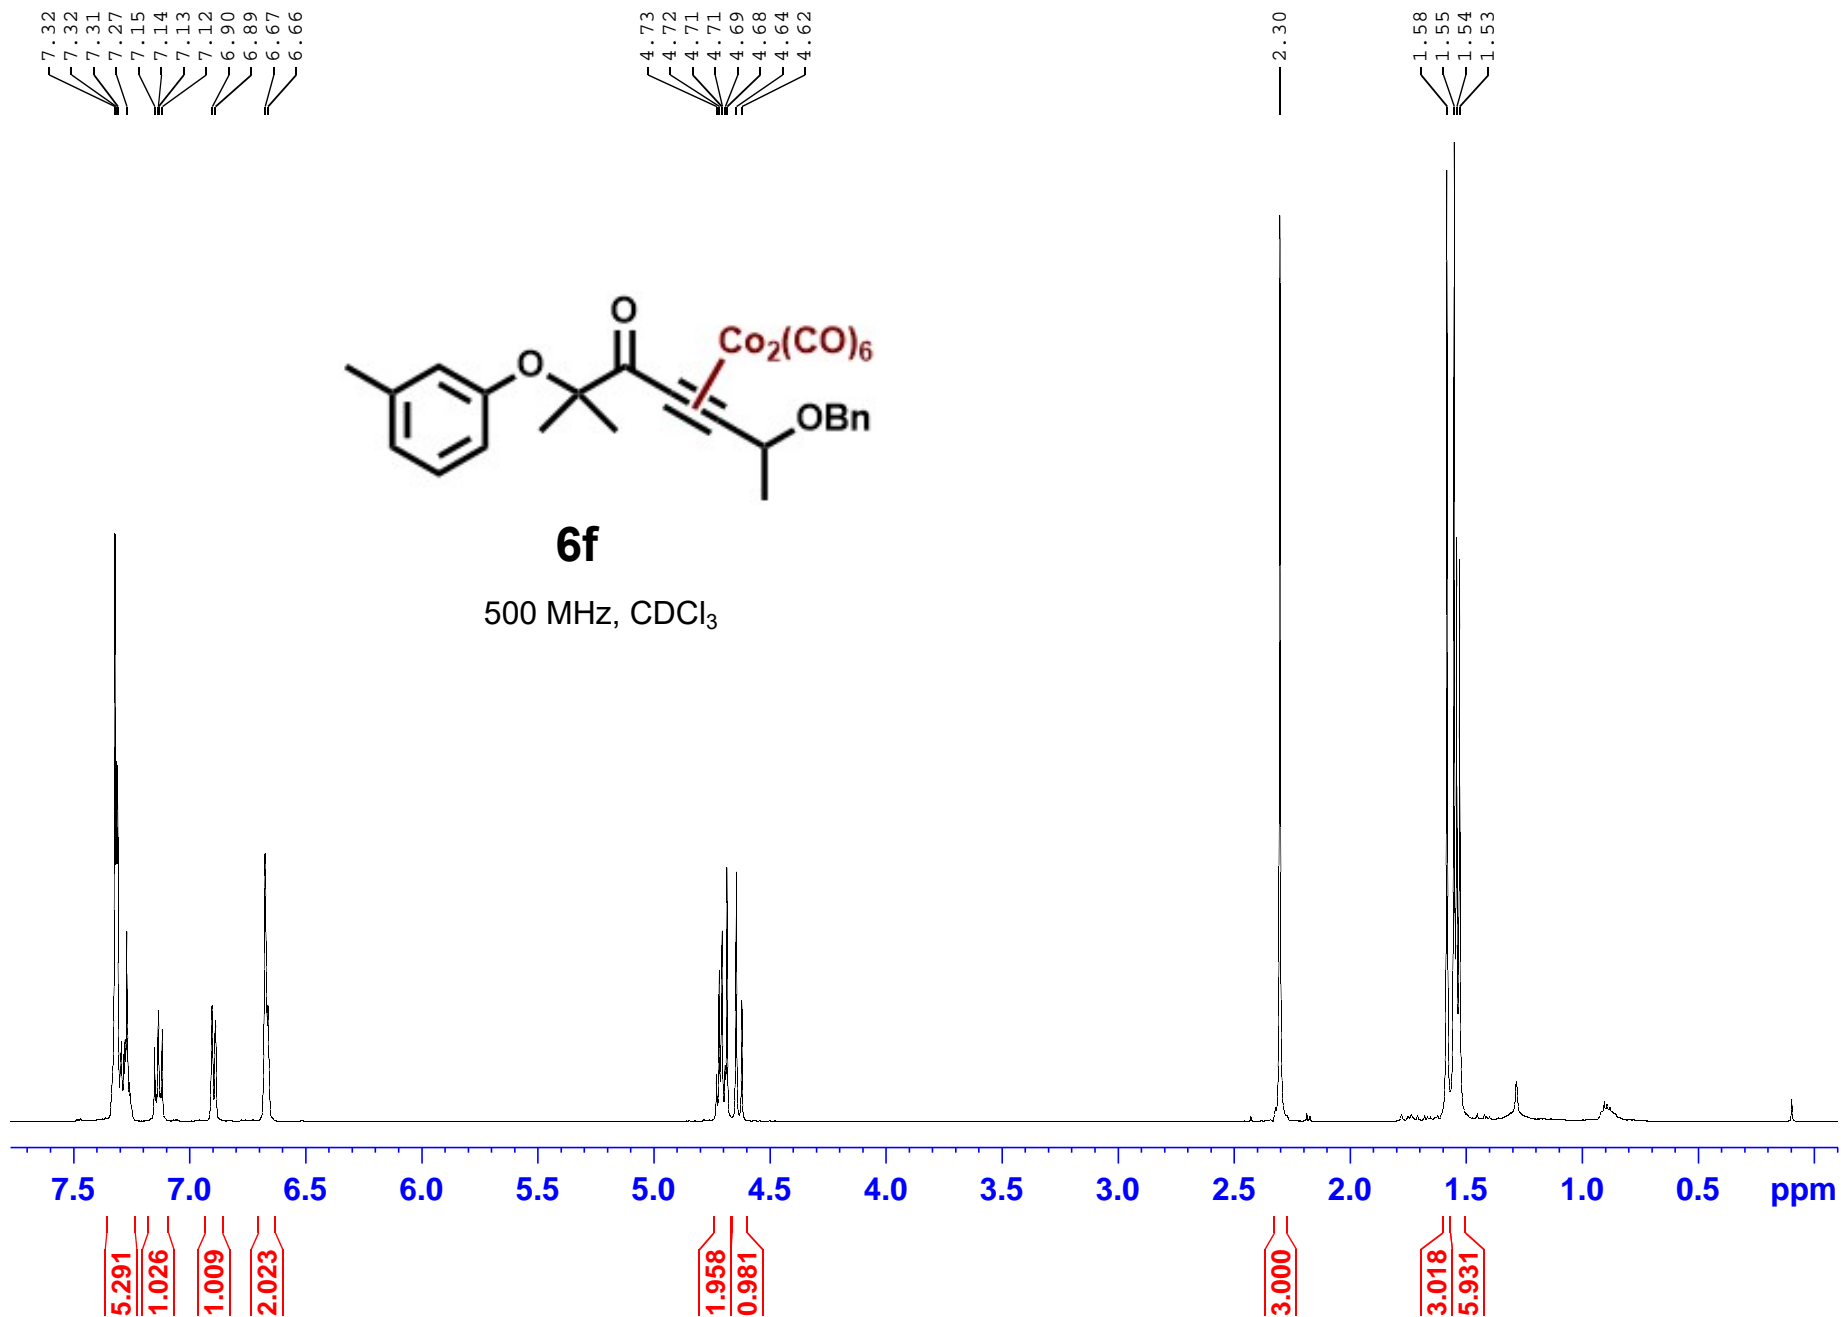

bs0.0608 2 13C m-Me proprg Me SM complex, 125 MHz, 6/8/21

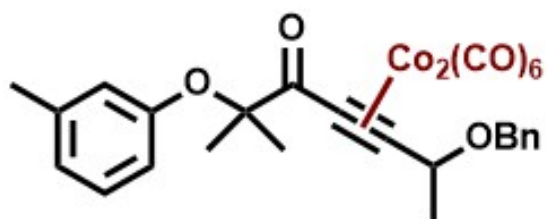

**6f**

125 MHz, CDCl<sub>3</sub>

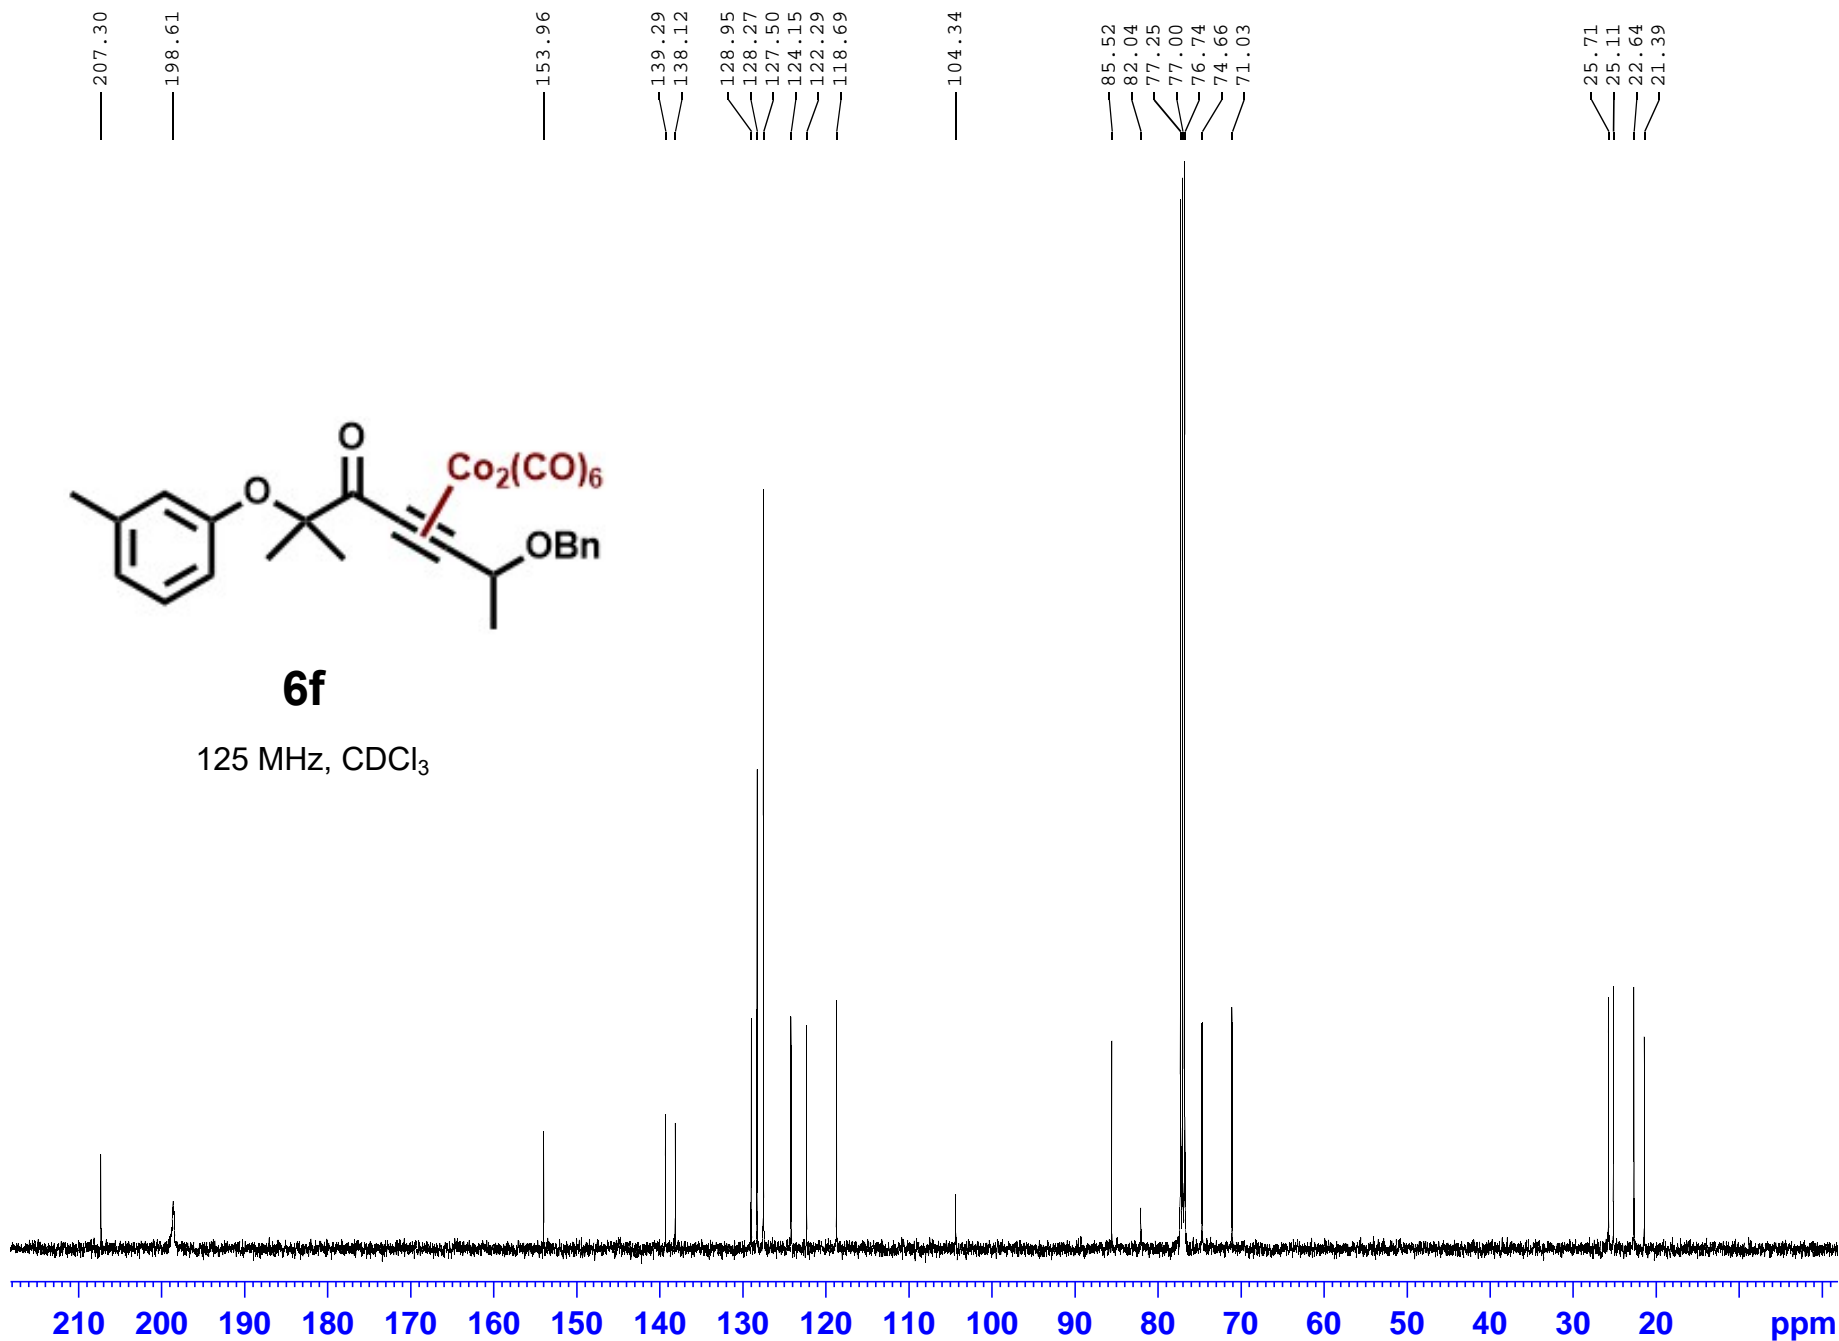

bs0.0609 1 o-Me propargyl Me SM complex, 6/9/21

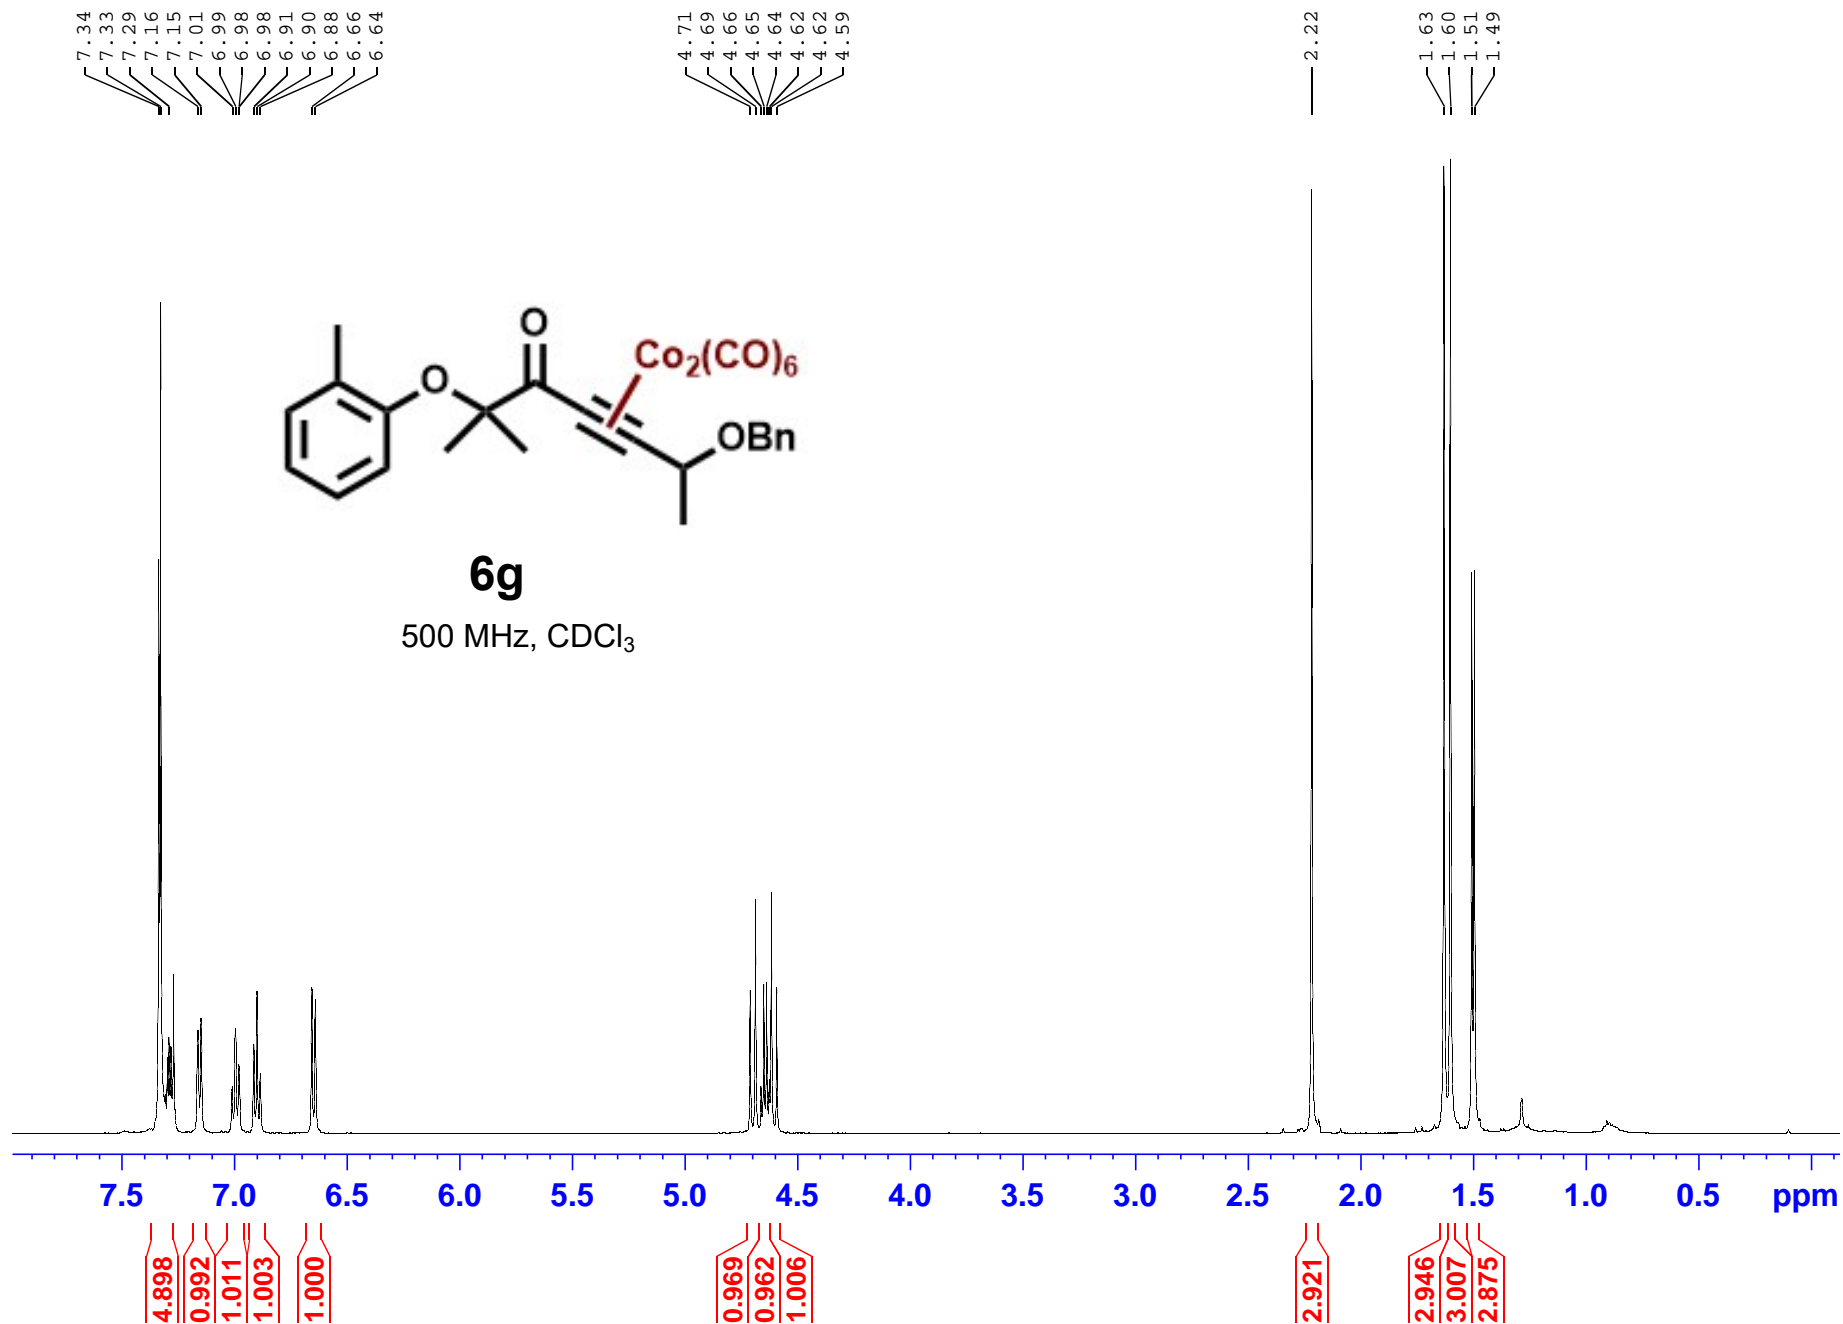

bs0.0609 2 13C o-Me proparg Me SM complex, 125 MHz, 6/9/21

— 208.46

— 198.51

— 153.04

— 138.07

— 131.29

— 129.39

— 128.27

— 127.57

— 127.53

— 126.20

— 122.11

— 117.77

— 105.27

— 84.50

— 81.67

— 77.25

— 77.00

— 76.74

— 74.37

— 70.96

— 25.56

— 25.02

— 22.34

— 16.61

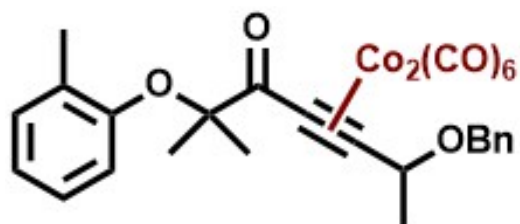

**6g**

125 MHz,  $\text{CDCl}_3$

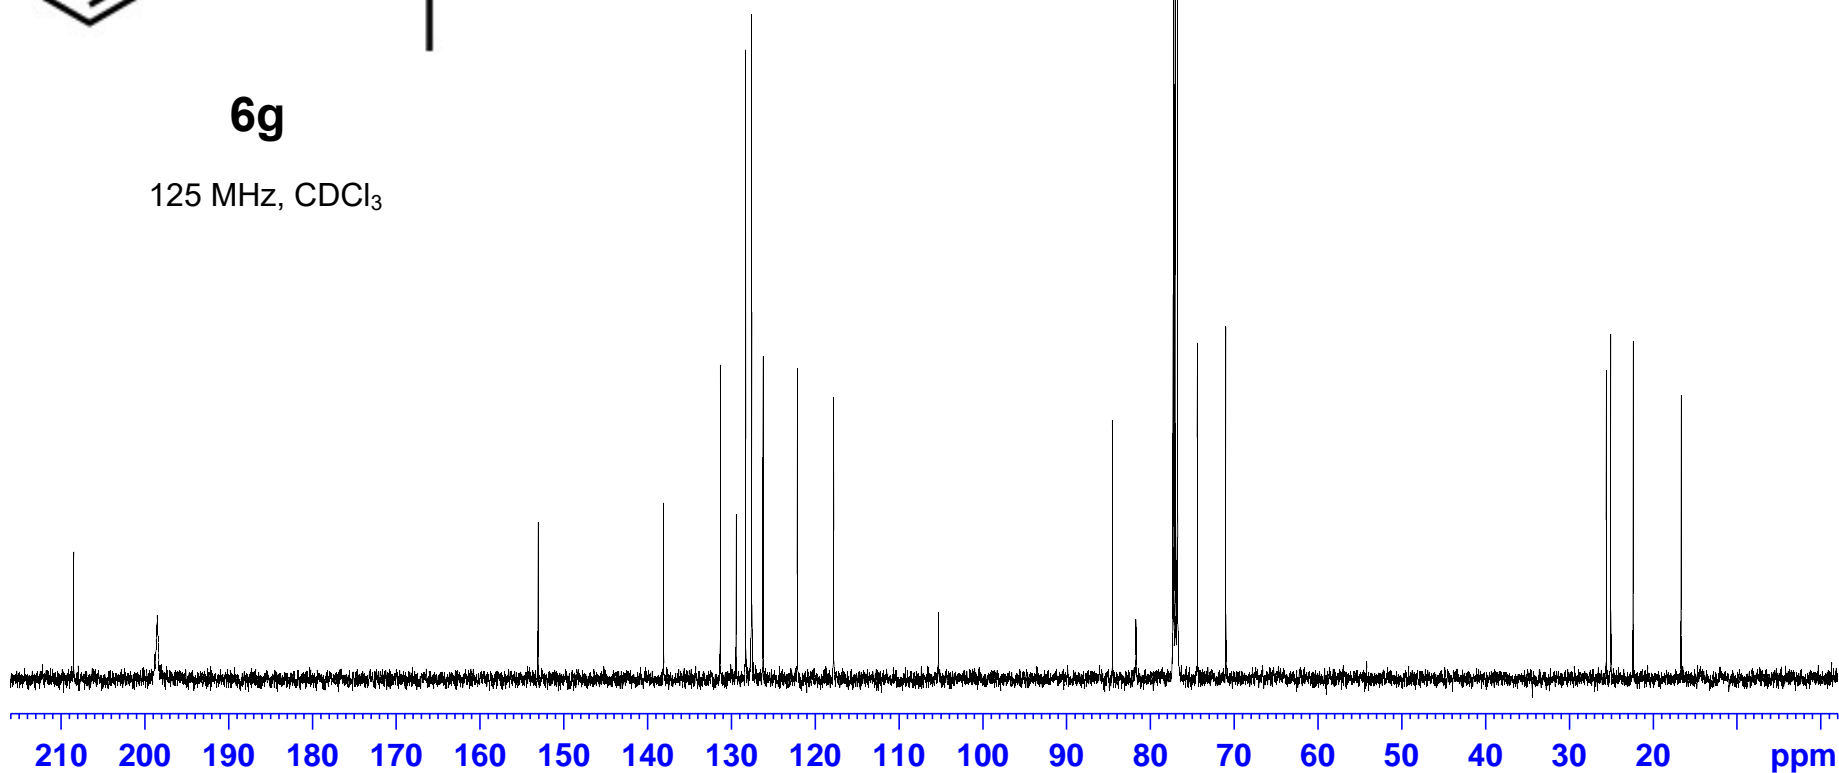



7.268  
7.260  
7.244  
7.236  
7.043  
7.036  
7.018  
7.011  
6.993  
6.985  
6.966  
6.962  
6.942  
6.937  
6.590  
6.584  
6.563  
6.559

4.247

3.435  
3.409  
3.389  
3.366

1.646

1.241  
1.218

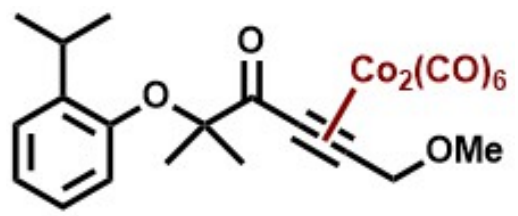

**6h**

300 MHz, CDCl<sub>3</sub>

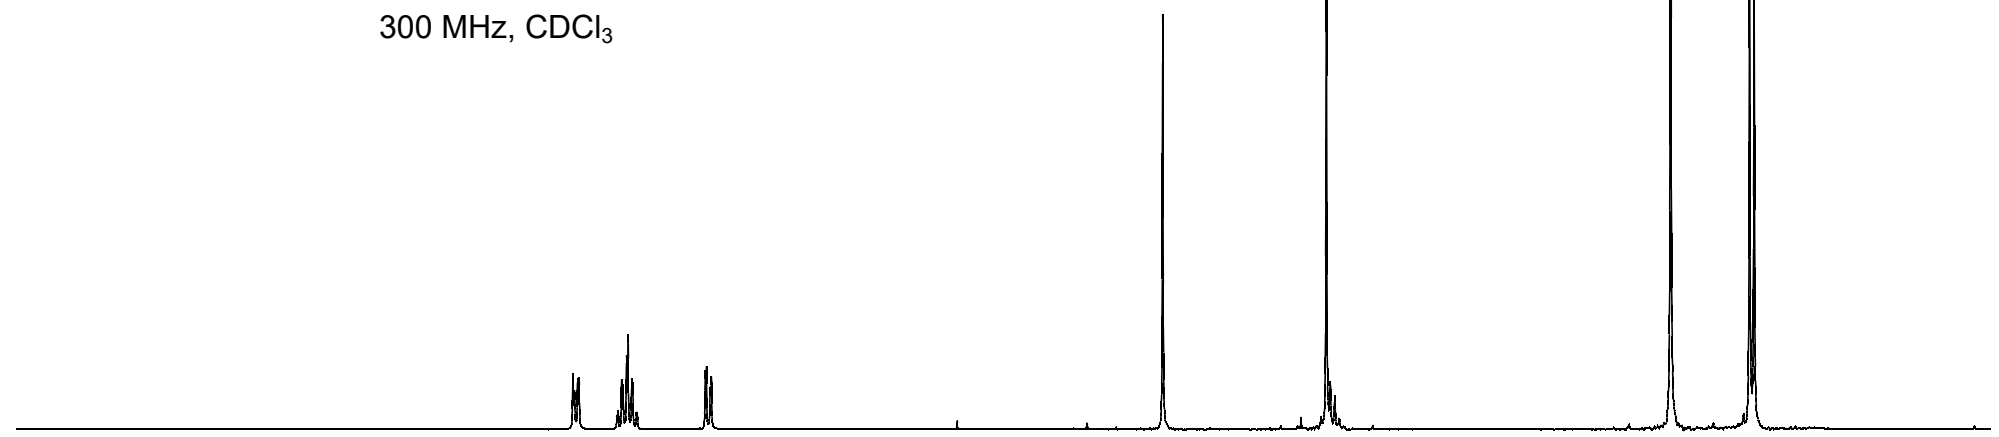

9.5 9.0 8.5 8.0 7.5 7.0 6.5 6.0 5.5 5.0 4.5 4.0 3.5 3.0 2.5 2.0 1.5 1.0 ppm

1.07

1.98

0.98

2.00

3.97

6.28

6.25

— 207.832

— 198.423

— 151.957

— 139.283

— 126.816

— 125.897

— 122.184

— 116.974

— 96.129

— 84.203

— 80.009

— 77.424

— 77.000

— 76.578

— 72.561

— 58.898

— 26.482

— 25.613

— 22.962

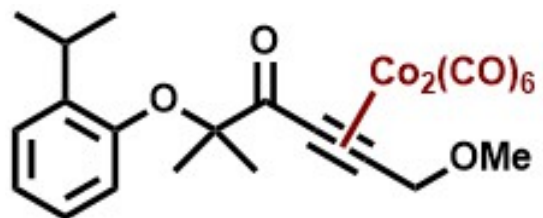

**6h**

75 MHz,  $\text{CDCl}_3$

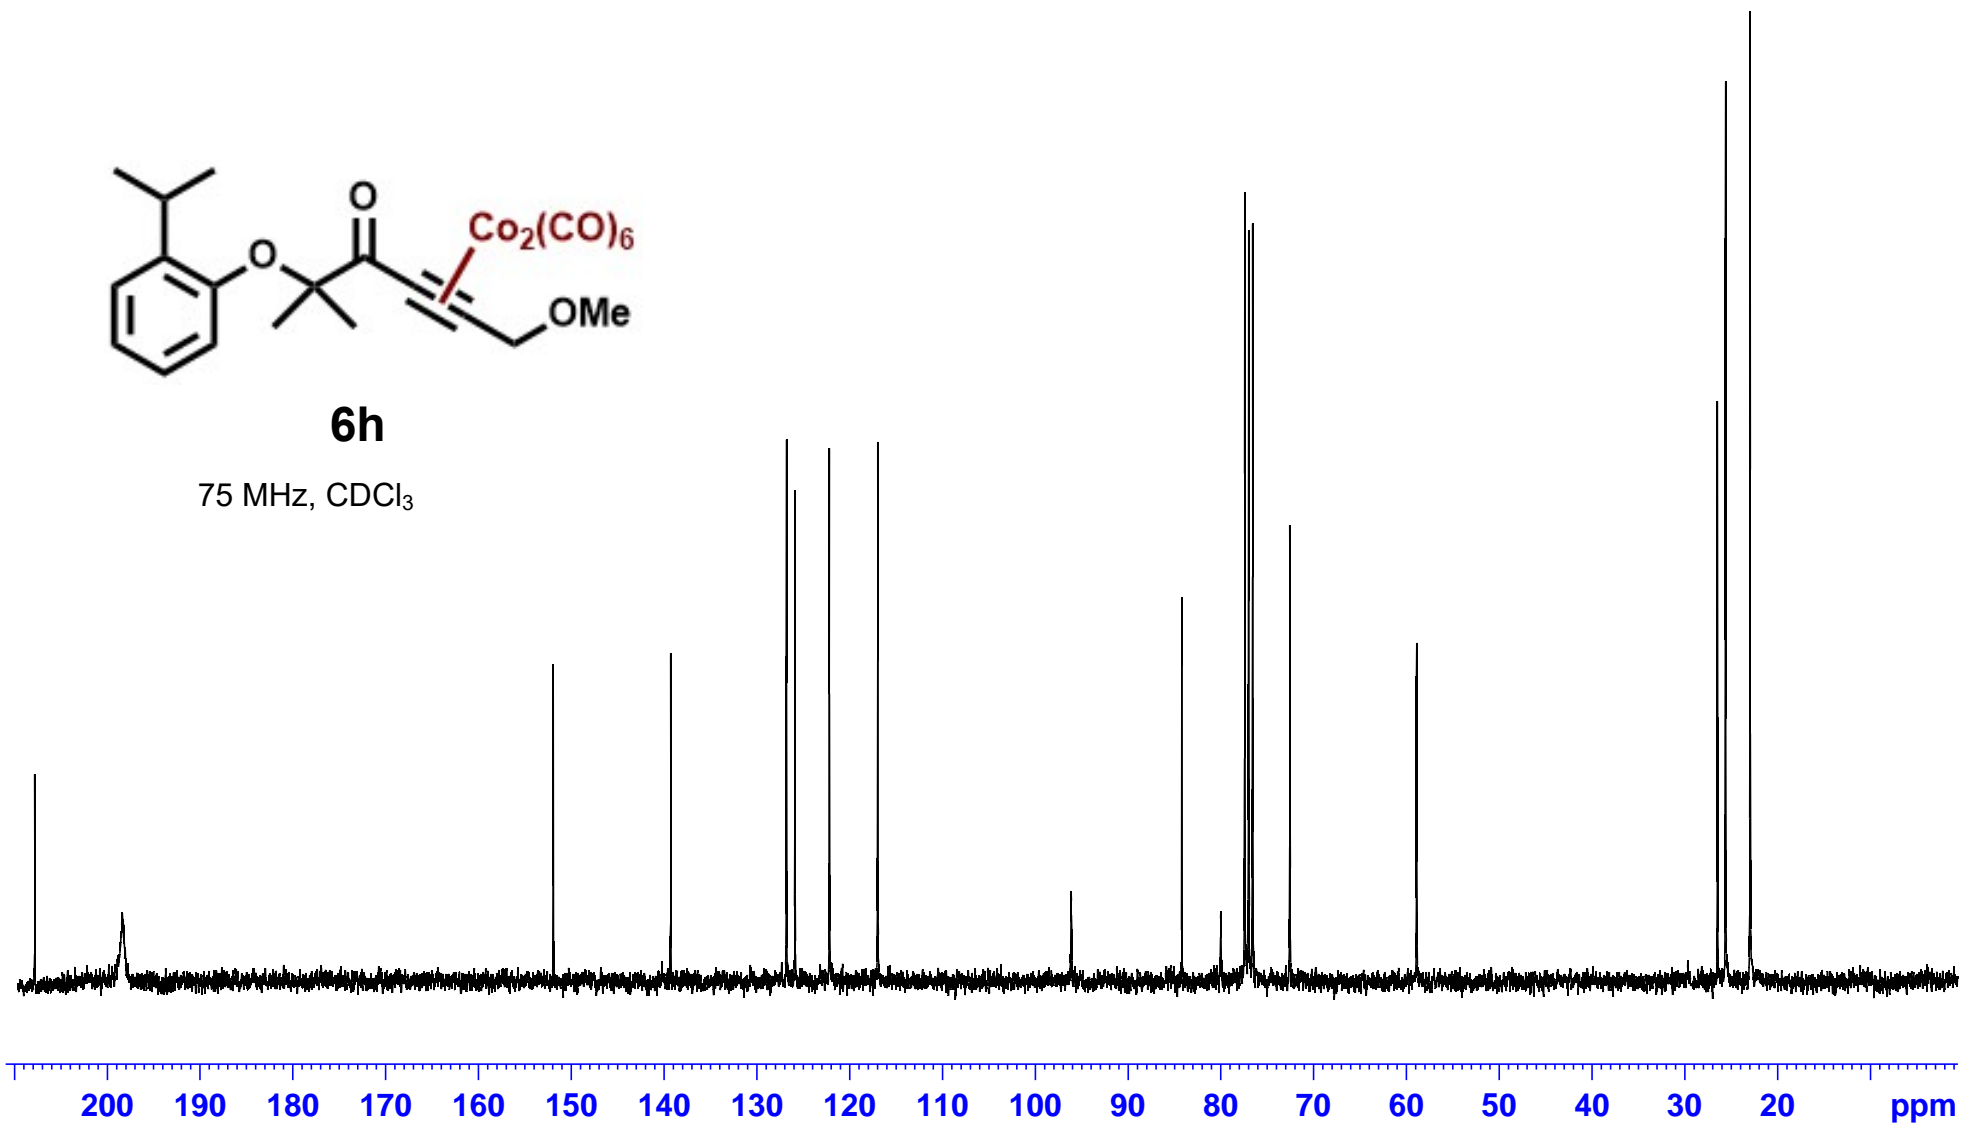

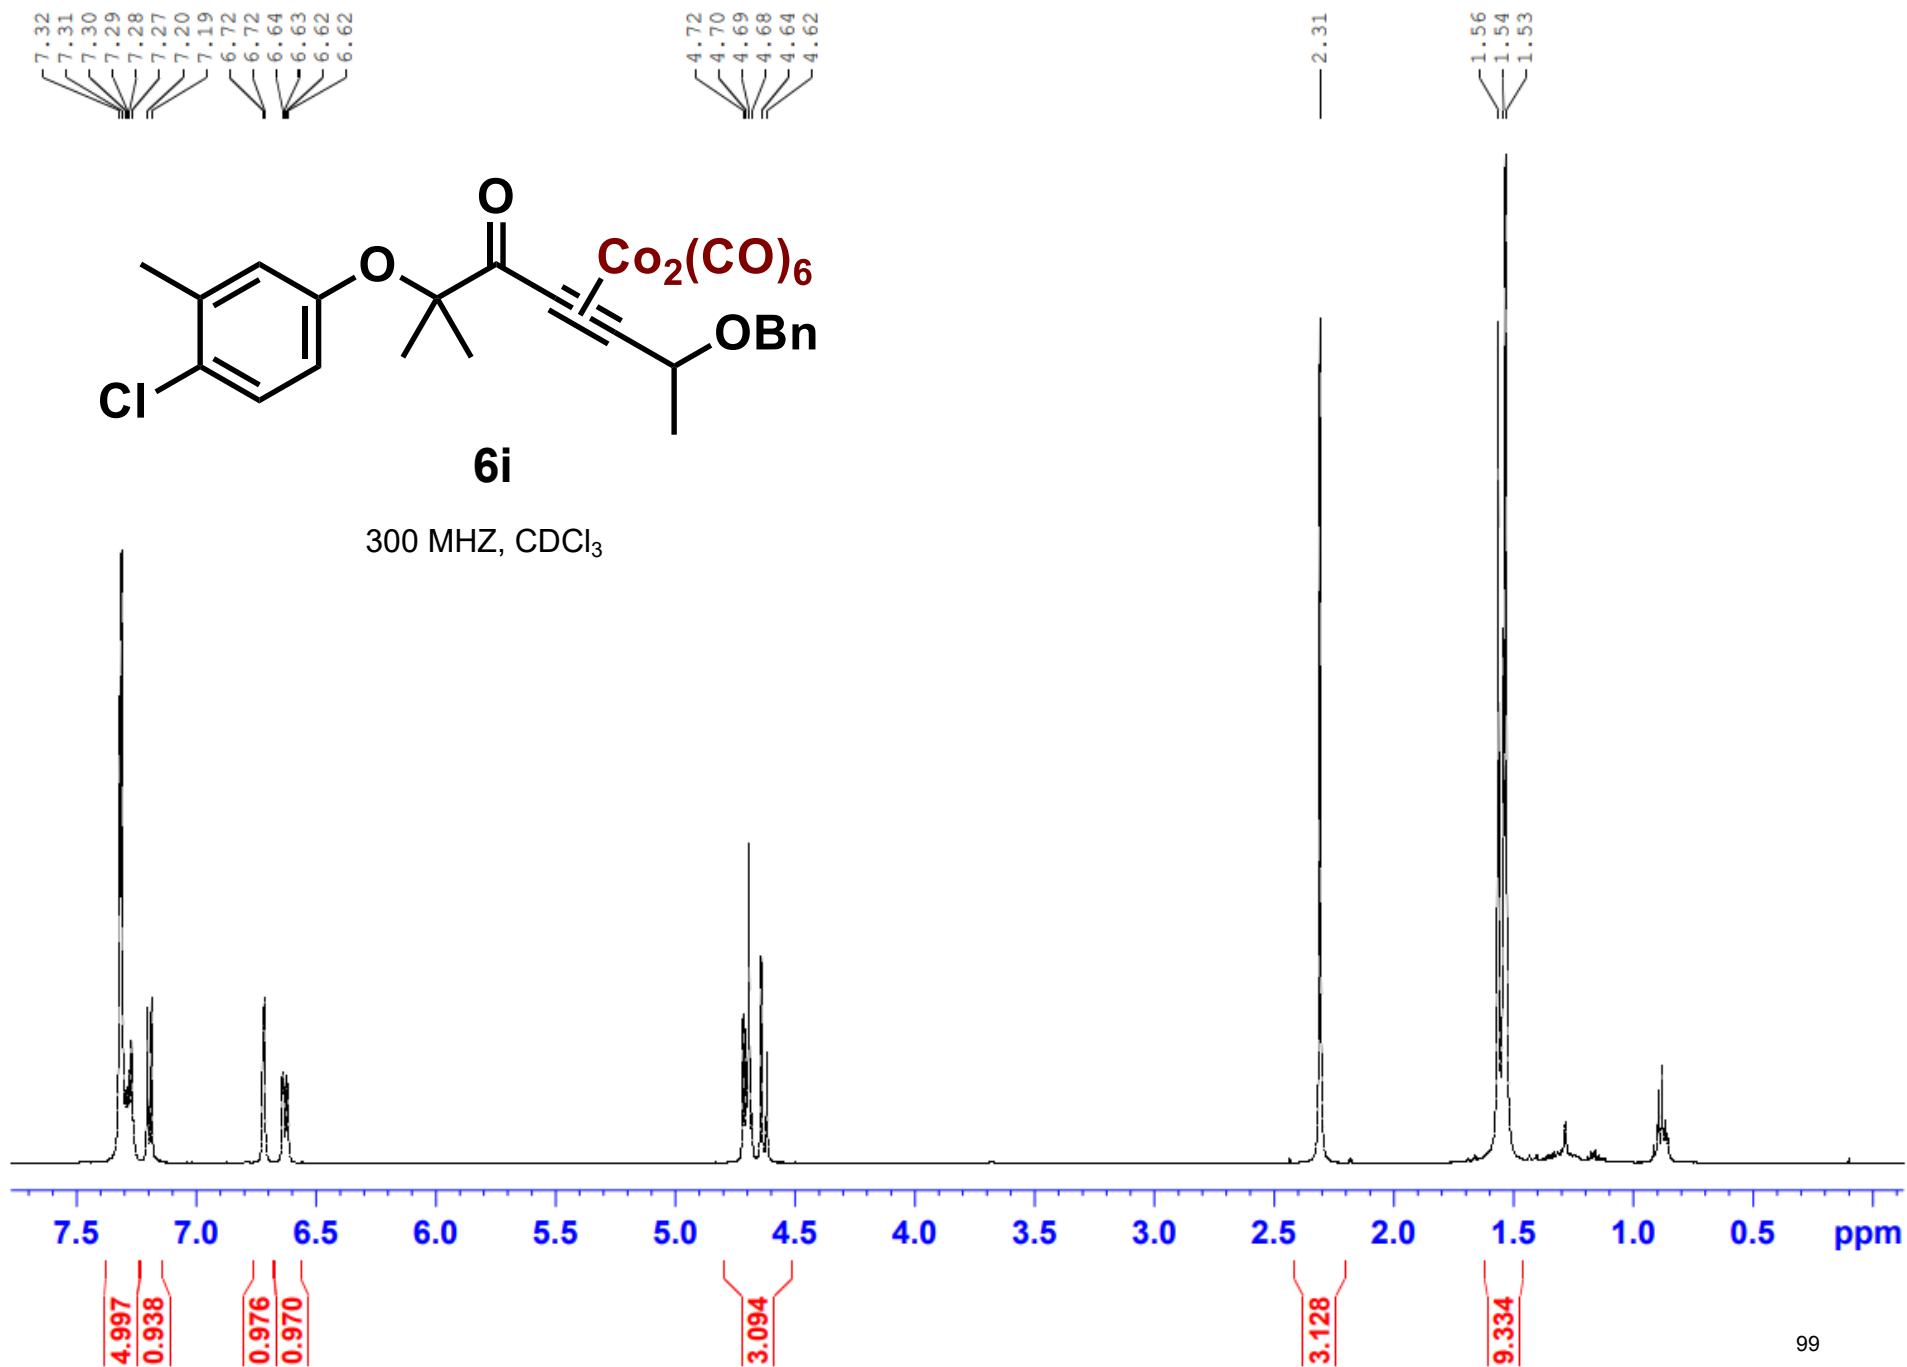

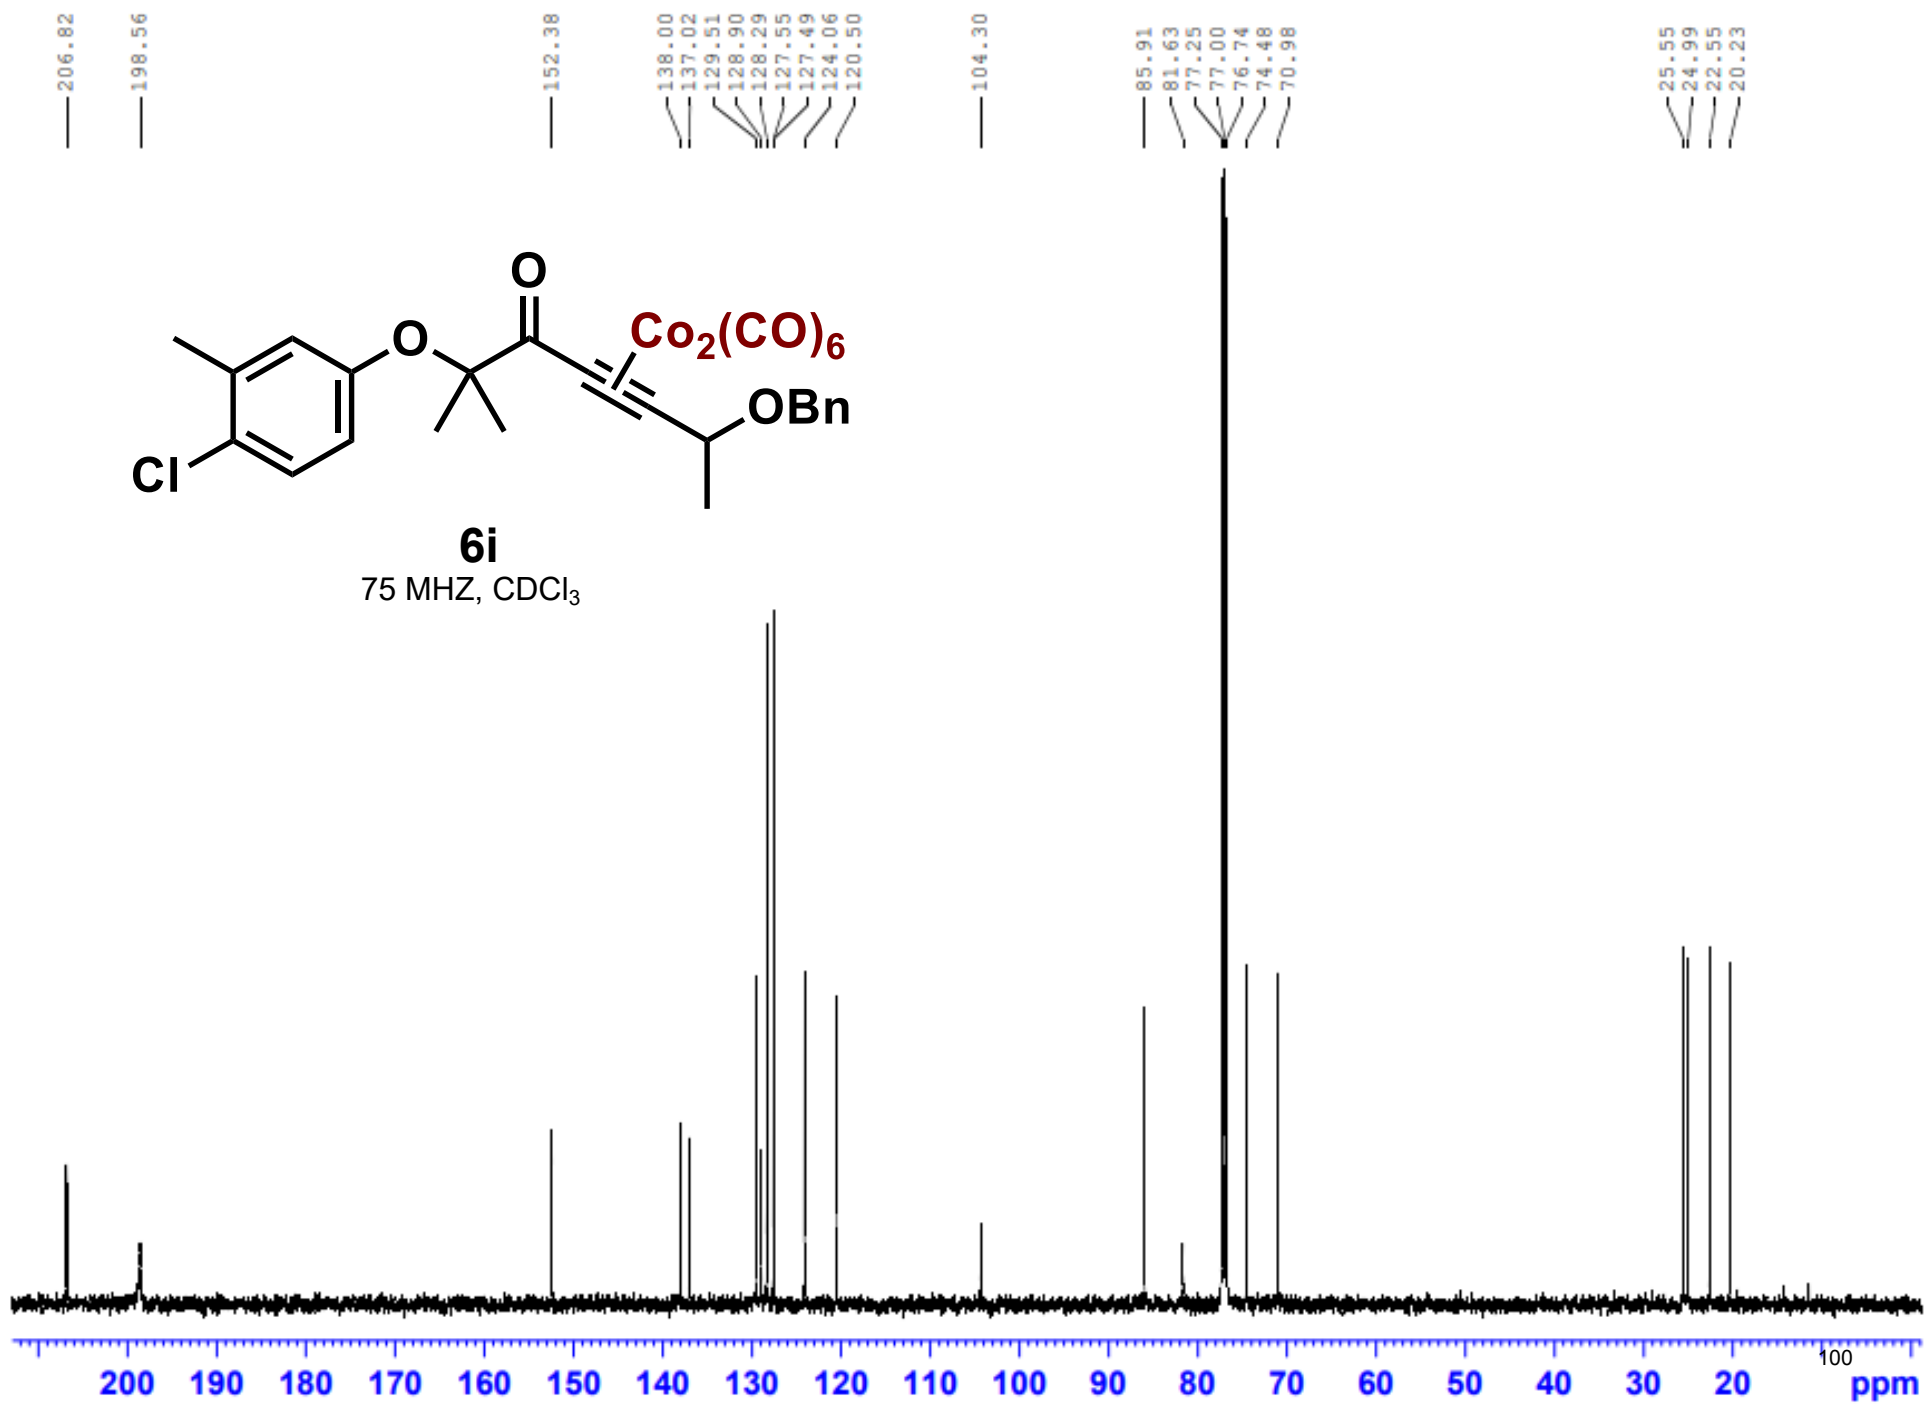

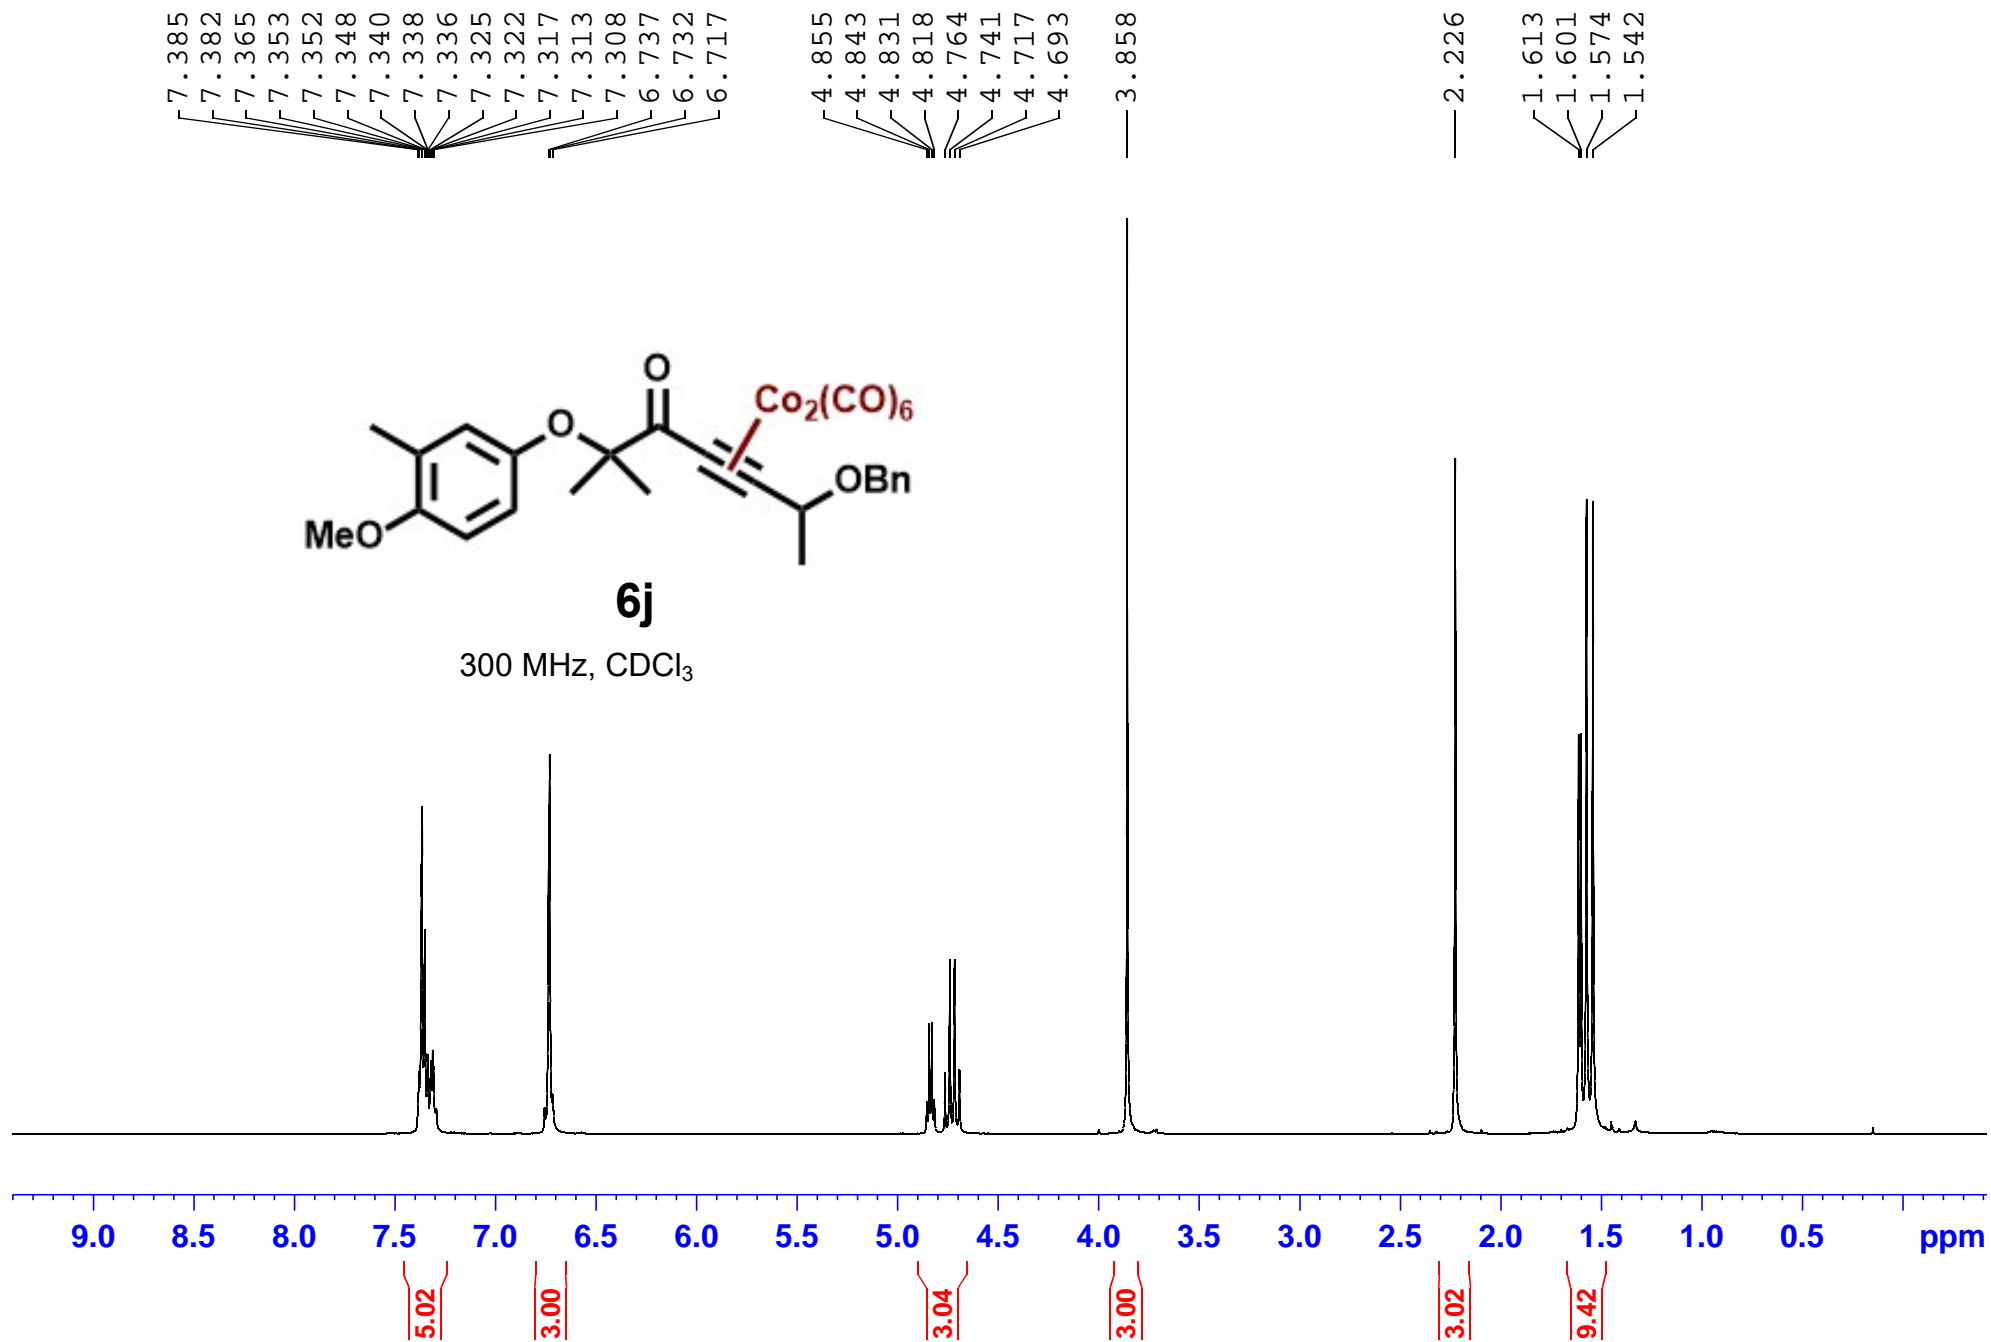

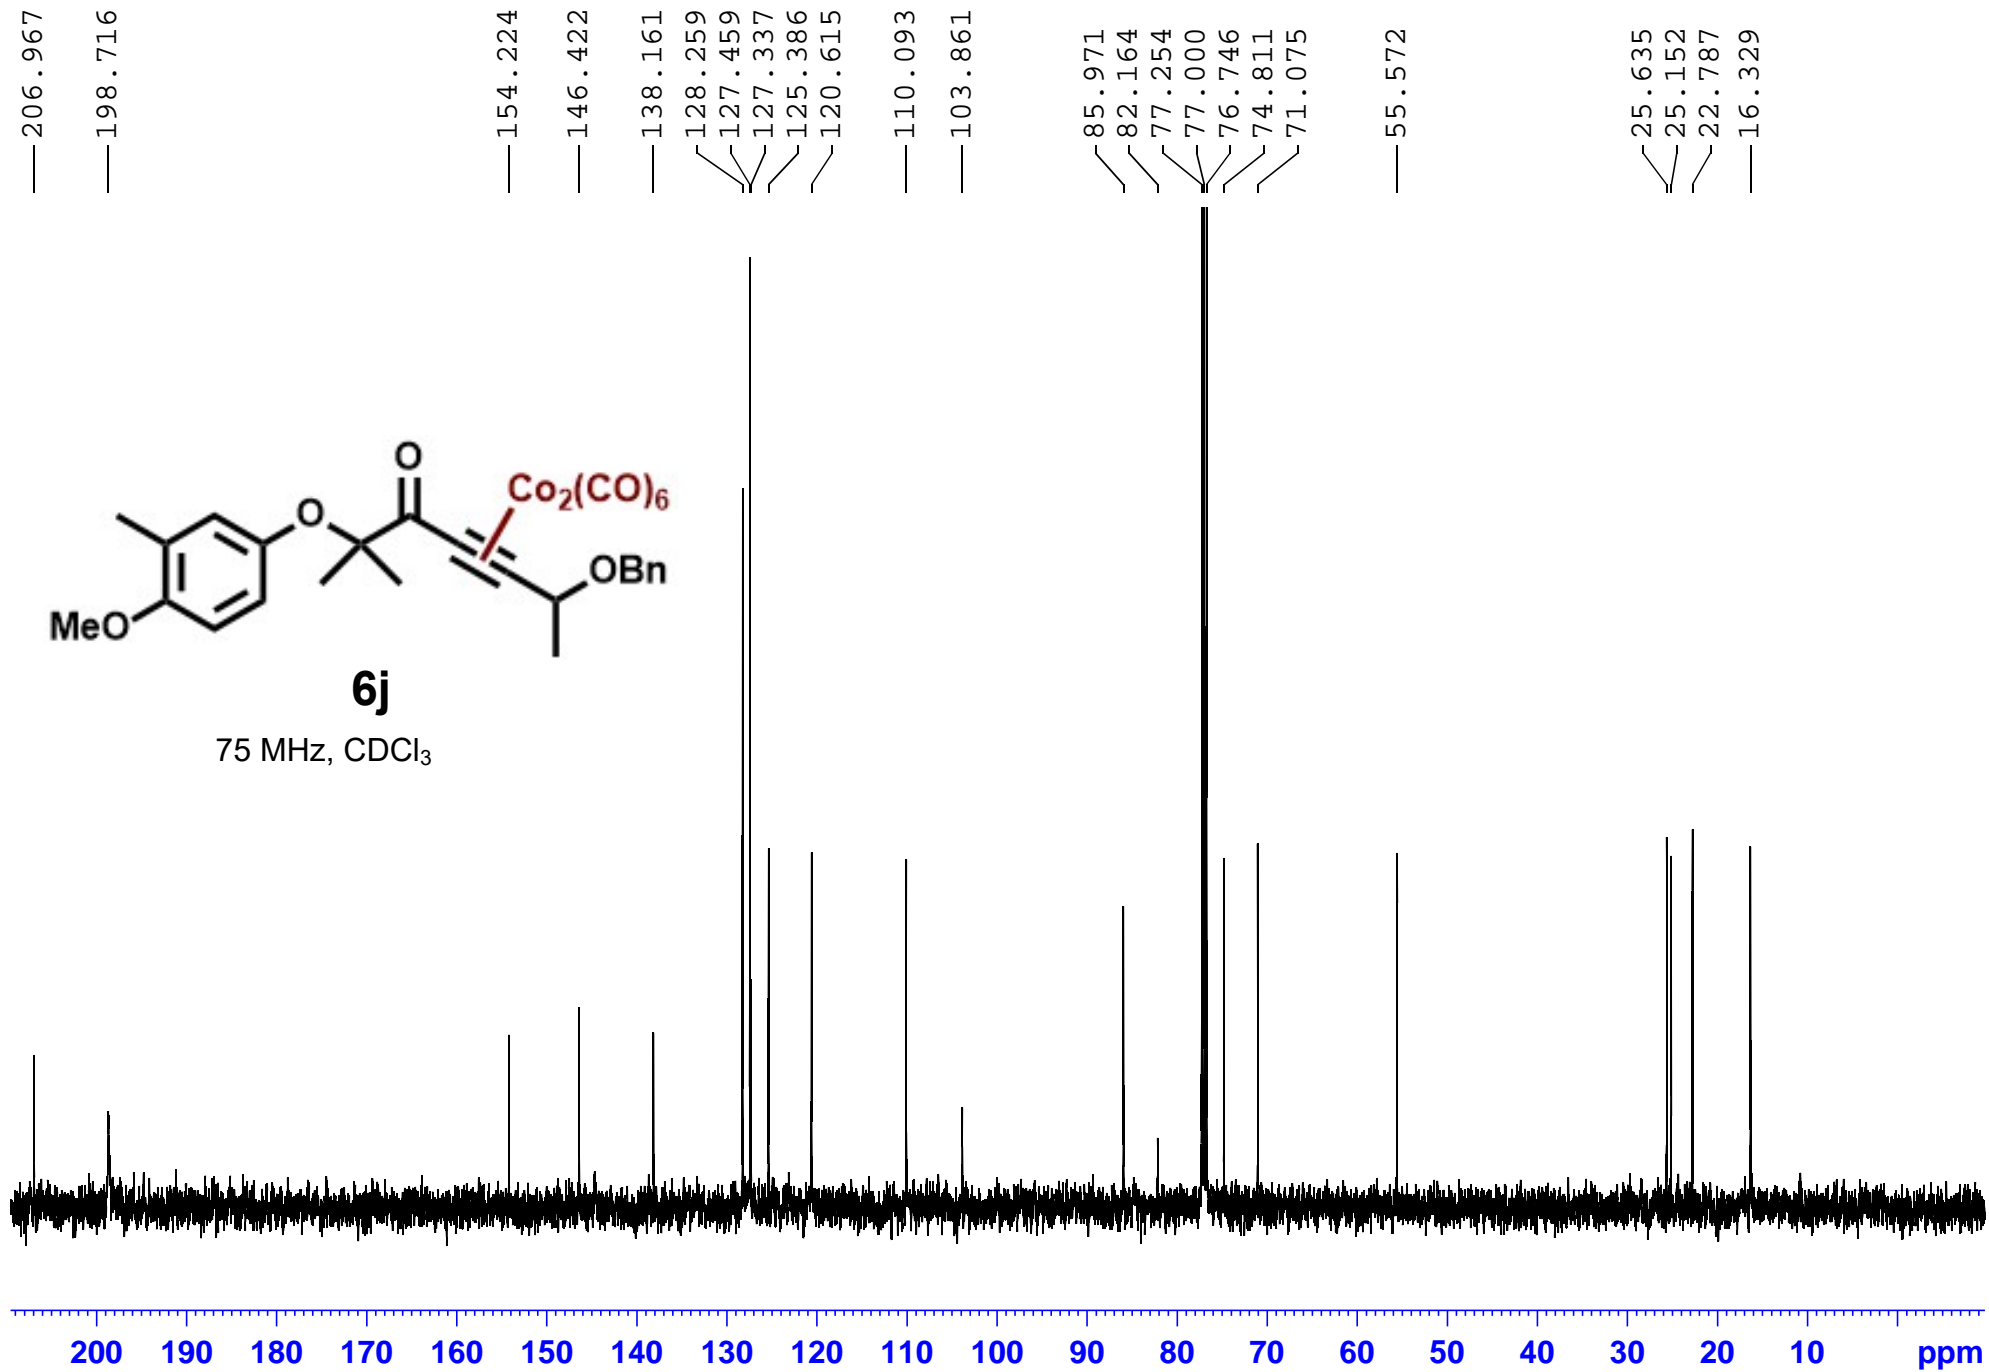

7.270  
7.228  
7.222  
7.204  
7.181  
7.175  
7.134  
7.131  
7.123  
7.107  
7.102  
7.038  
7.034  
7.013  
7.009  
6.989  
6.985

4.278

1.725

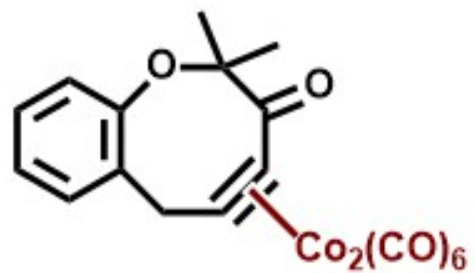

**7a**

300 MHz,  $\text{CDCl}_3$

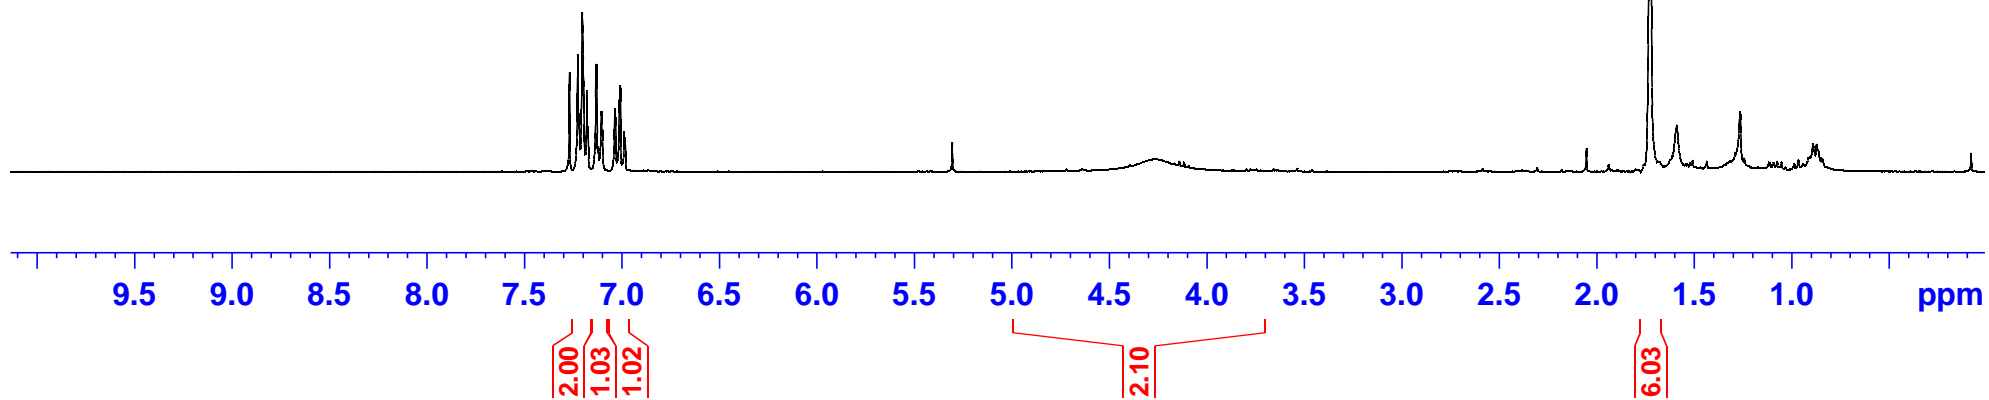

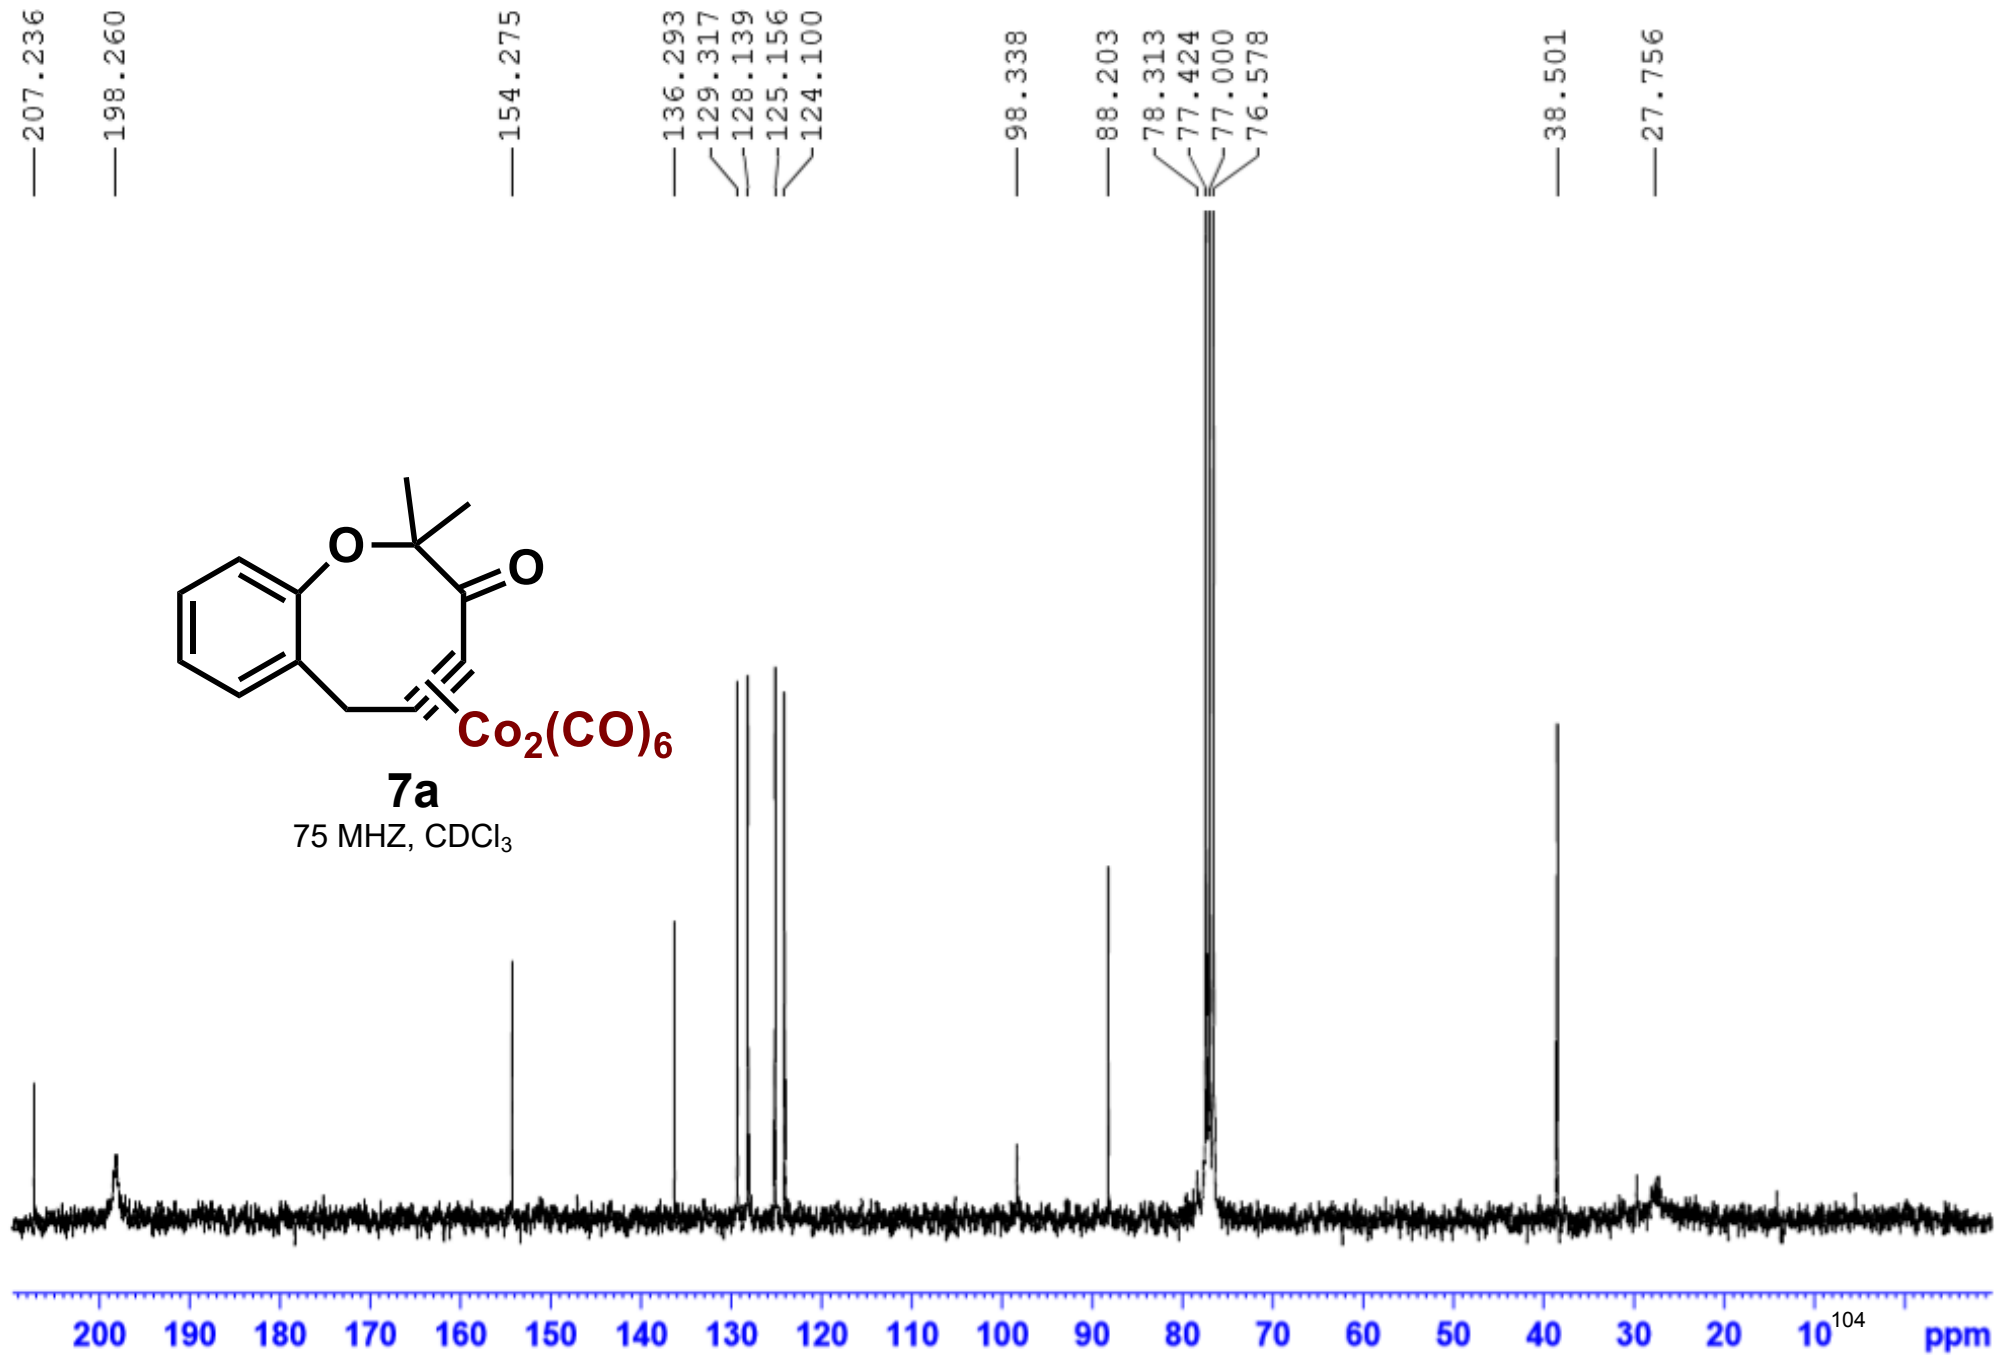



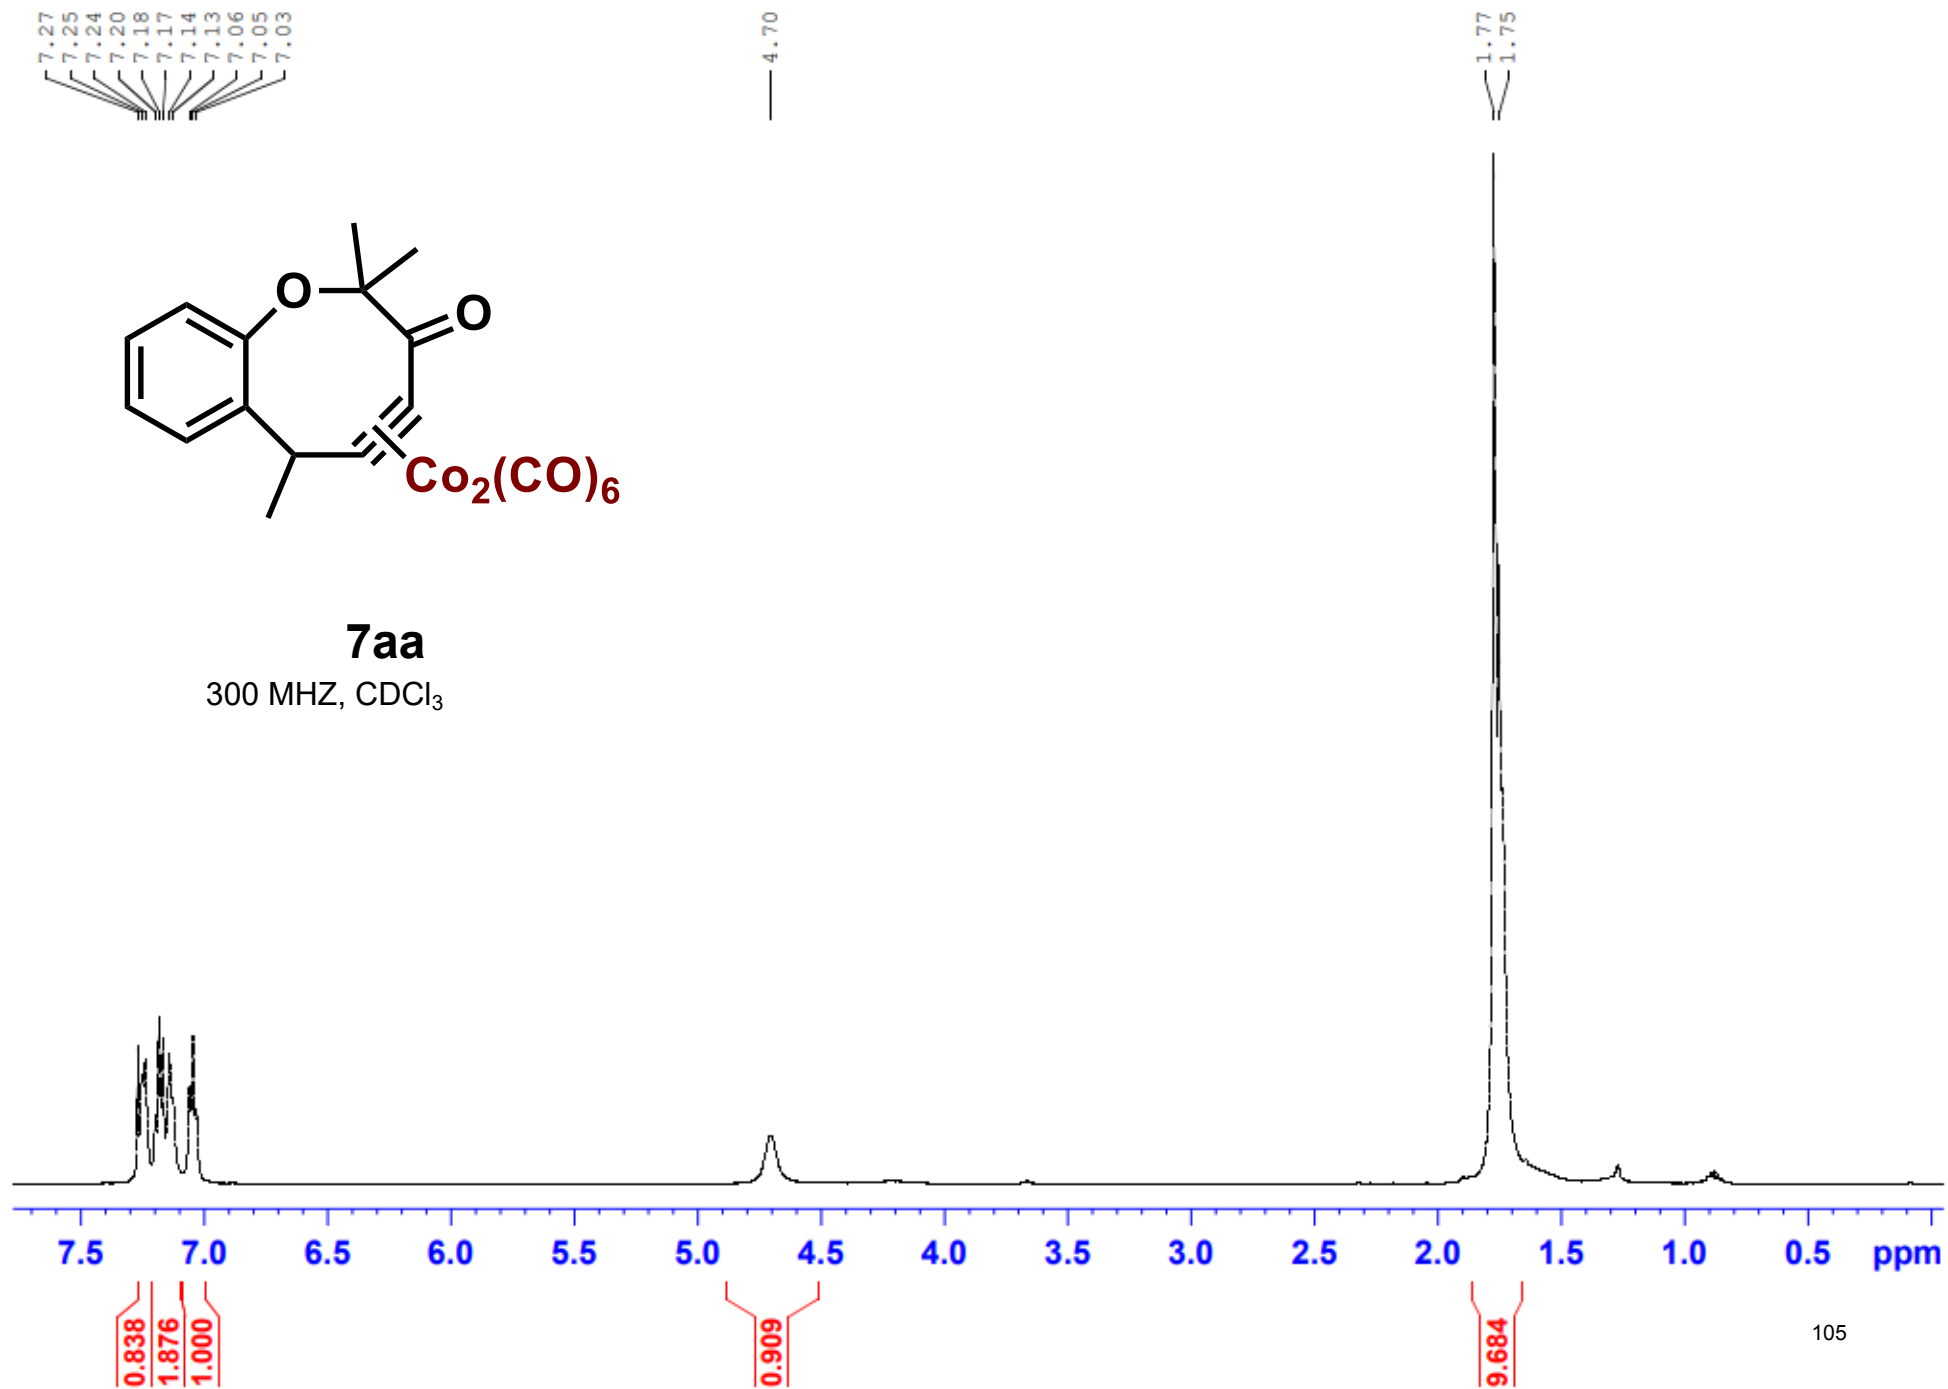



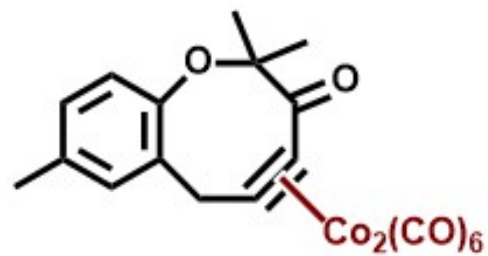

**7b**

300 MHz, CDCl<sub>3</sub>

— 7.270  
— 6.990

— 4.213

— 2.268

— 1.704

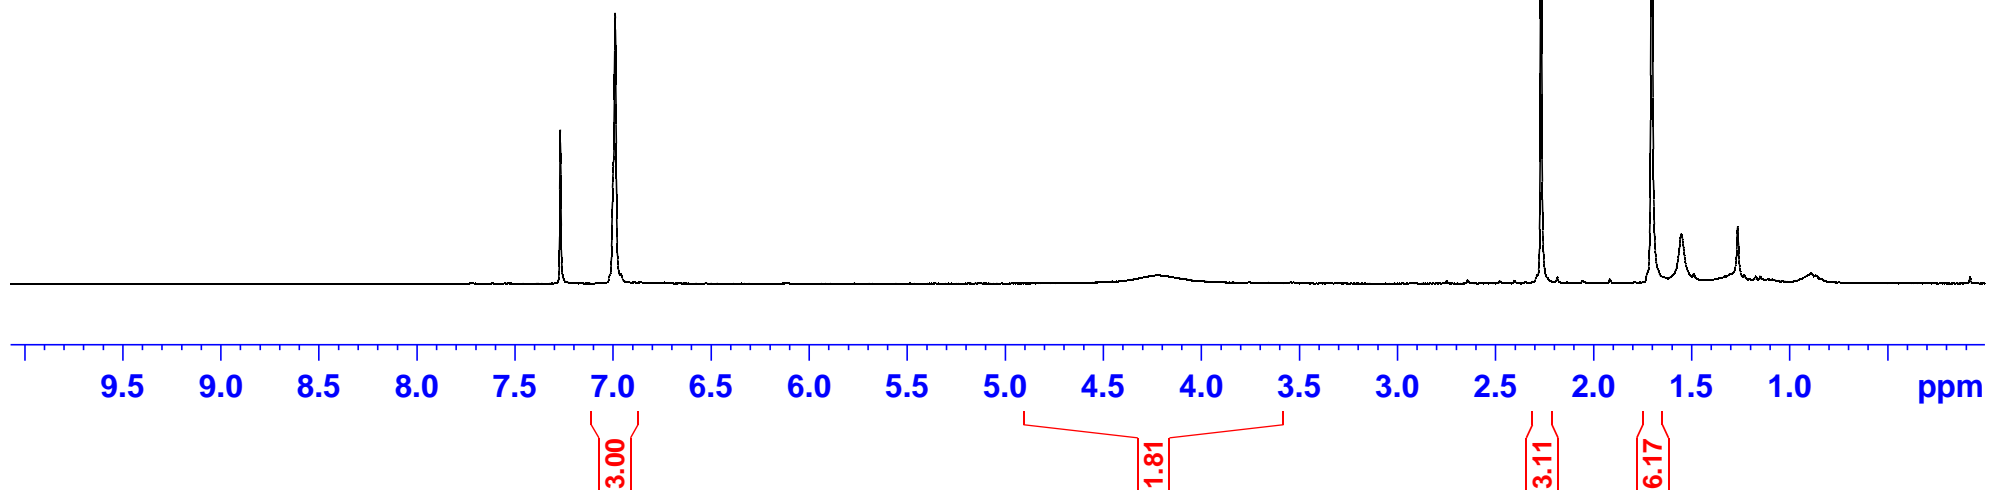

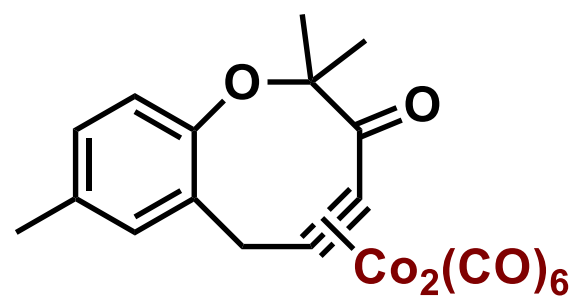

7.270  
7.004  
6.967

4.573  
4.523

3.869  
3.818

2.258

1.700

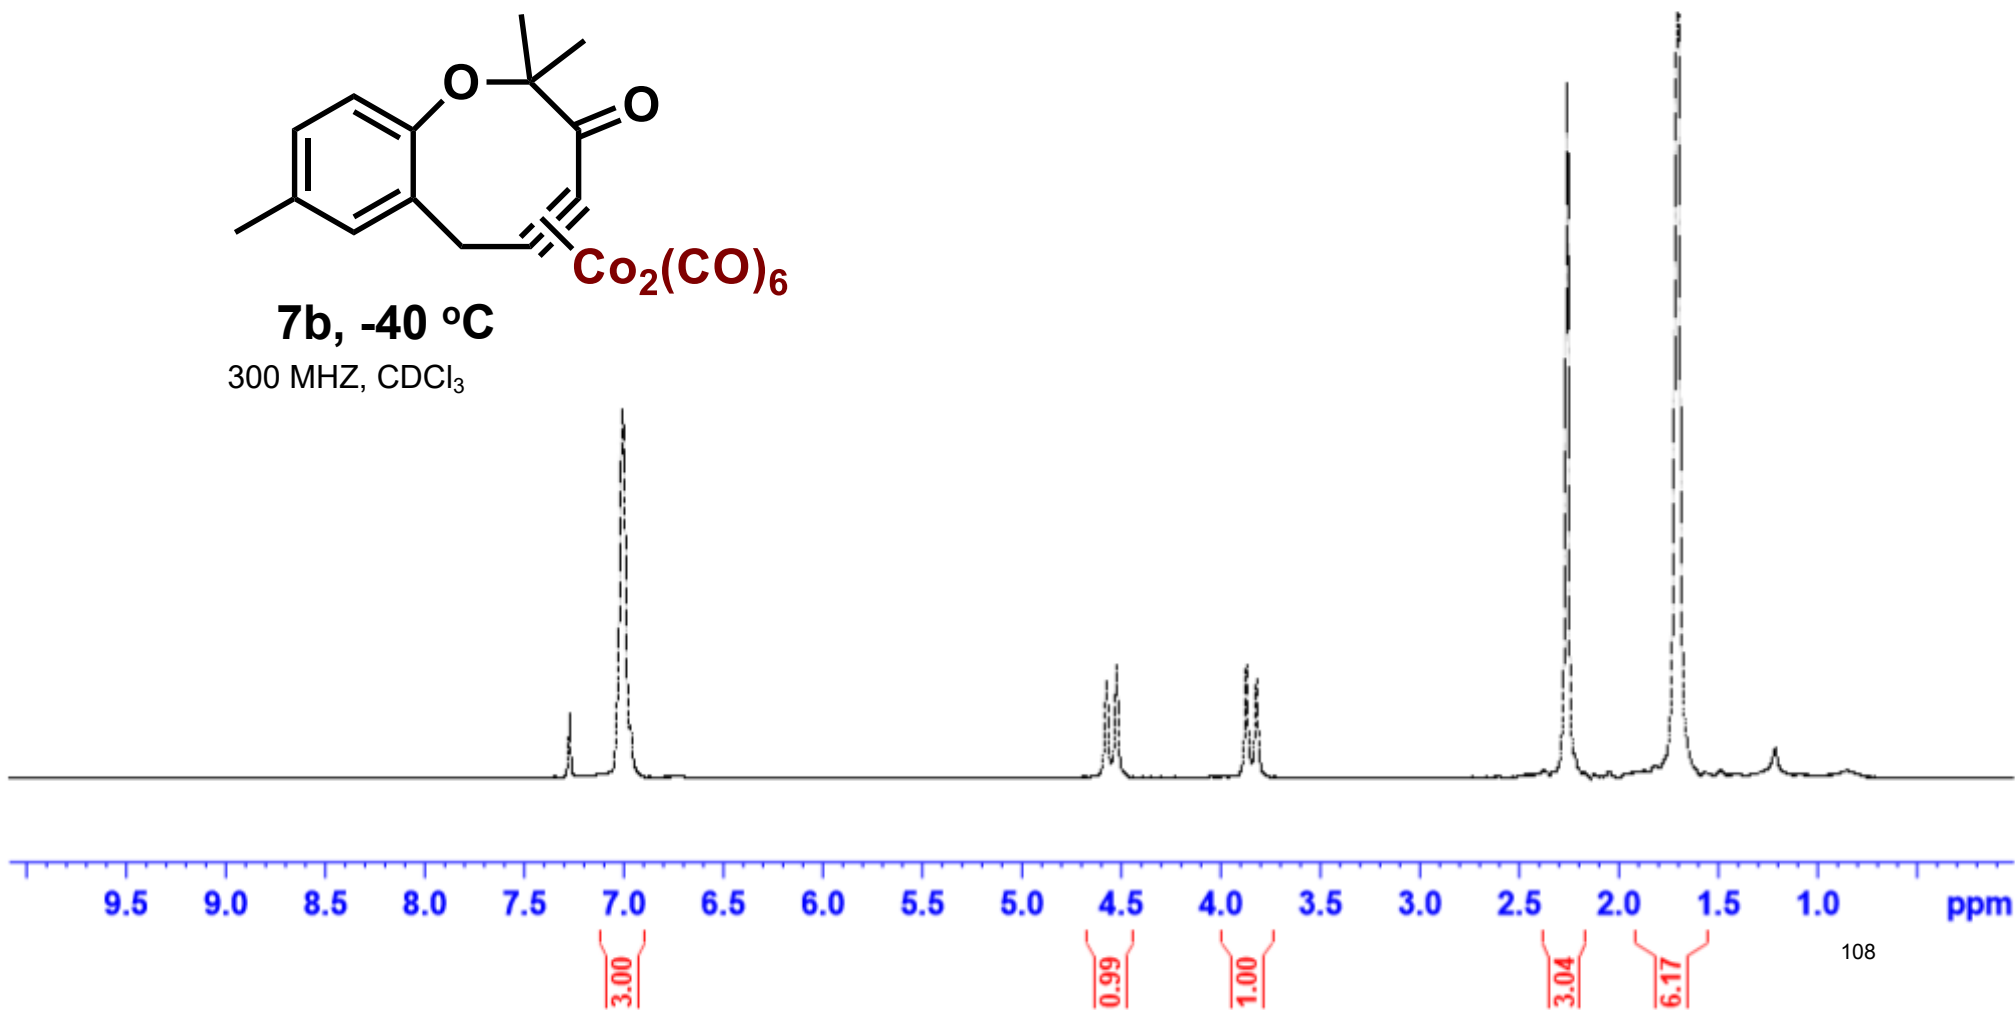

— 208.390  
— 198.276  
— 197.949

— 151.277  
— 135.793  
— 133.485  
— 129.706  
— 128.293  
— 124.506

— 98.155  
— 87.825  
— 77.425  
— 77.000  
— 76.576

— 38.141  
— 29.612  
— 25.328  
— 20.604

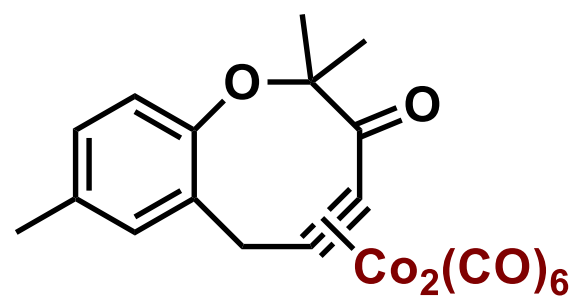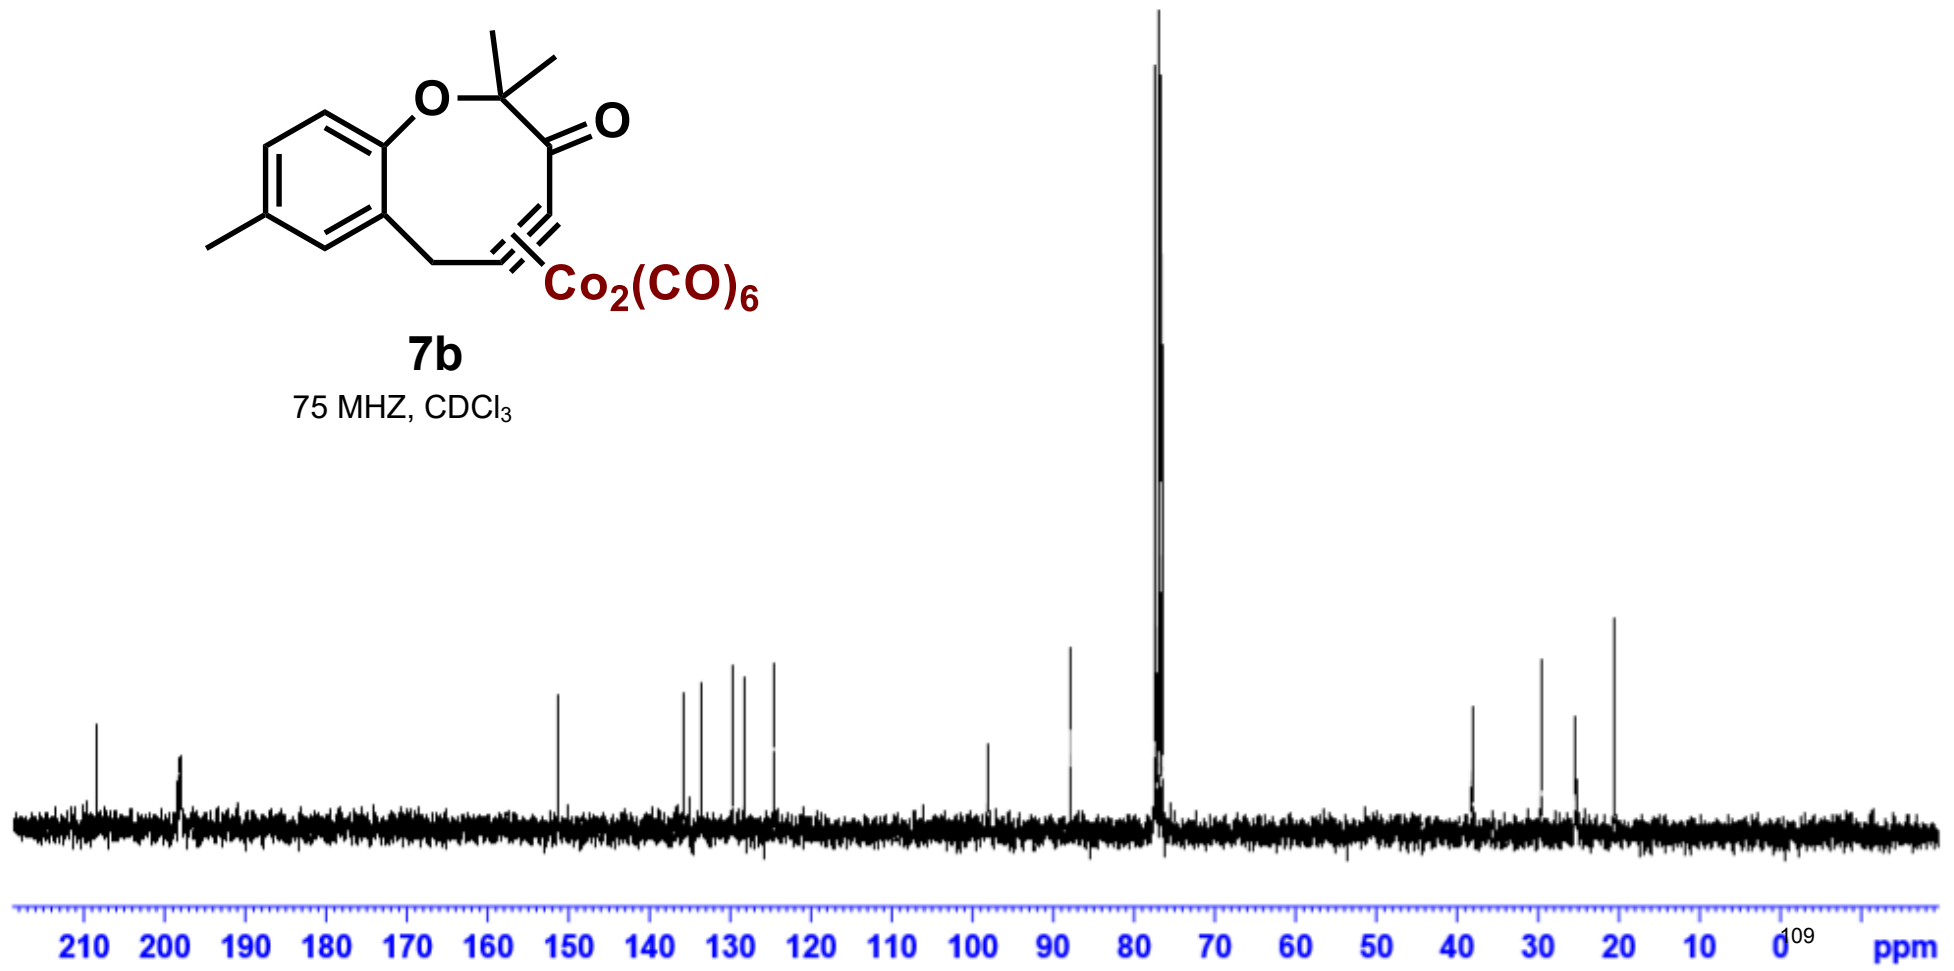



— 207.440

— 198.245

— 151.802

— 146.987

— 135.704

— 126.292

— 124.699

— 124.496

— 98.954

— 87.965

— 78.747

— 77.424

— 77.000

— 76.578

— 38.786

— 34.208

— 31.264

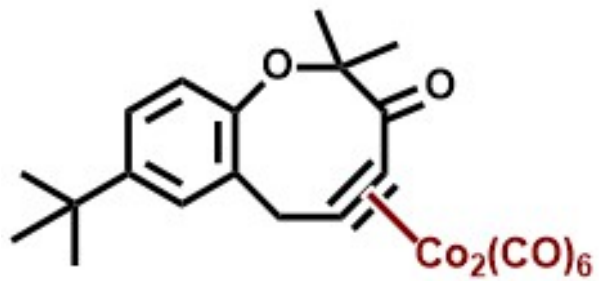

75 MHz, CDCl<sub>3</sub>

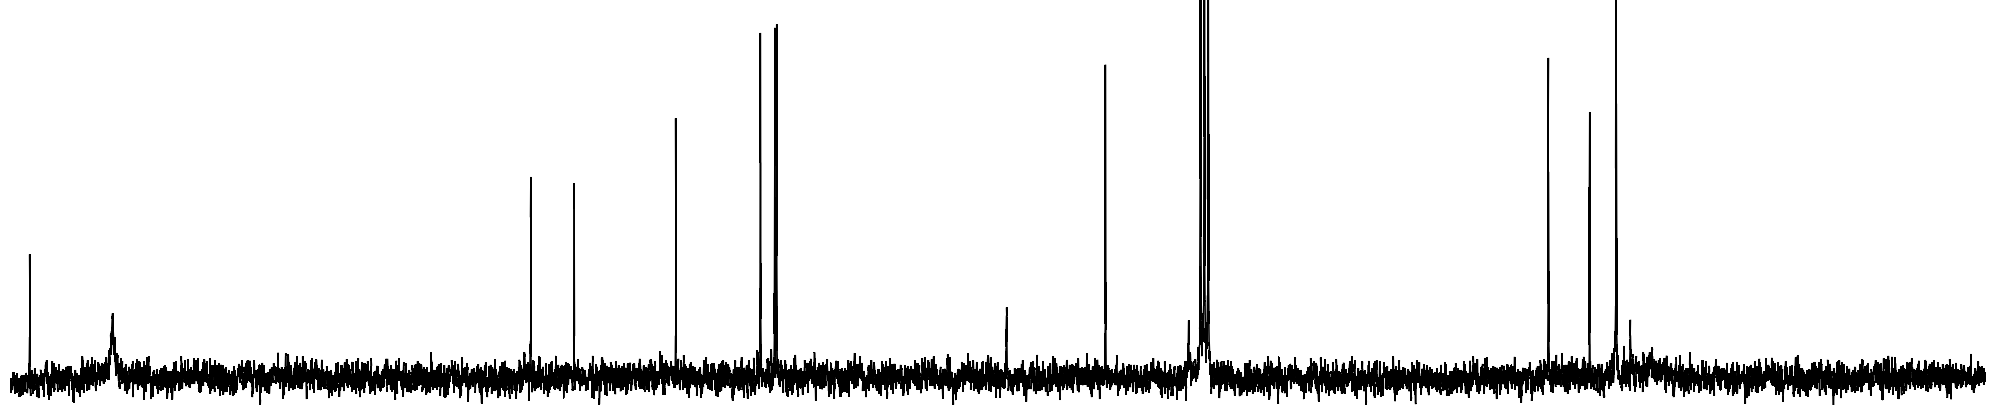

200 190 180 170 160 150 140 130 120 110 100 90 80 70 60 50 40 30 20 10 ppm

bso.0601 1,

7.270  
7.227  
7.184  
7.176  
7.156  
7.148  
7.057  
7.029

4.692

1.773  
1.760  
1.714

1.270

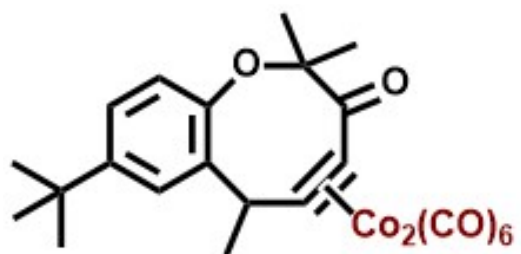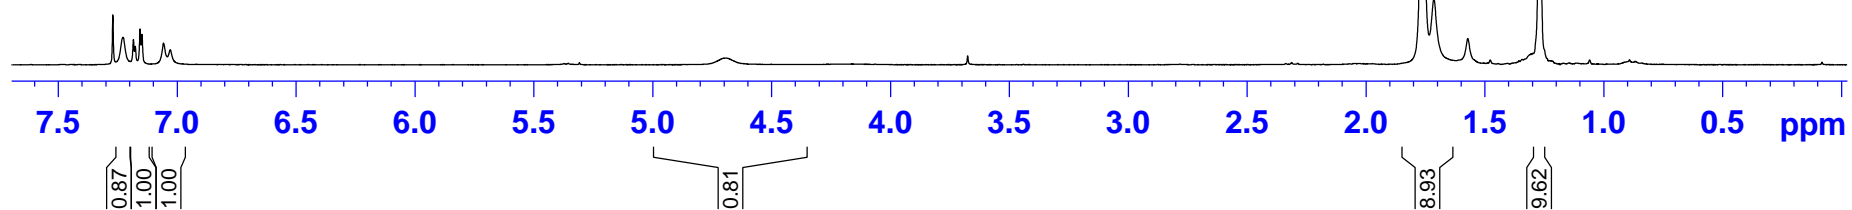



—207.362  
—198.124  
  
—151.676  
—146.633  
—139.613  
  
—128.783  
—124.097  
—122.032  
  
—107.773  
  
—88.206  
—79.100  
—77.424  
—77.200  
—77.000  
—76.578  
  
—36.566  
—34.405  
—31.294  
—29.991  
—25.786  
  
—17.813

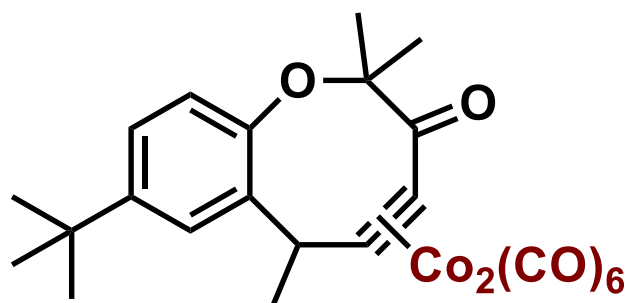

**7cc**  
75 MHz,  $\text{CDCl}_3$

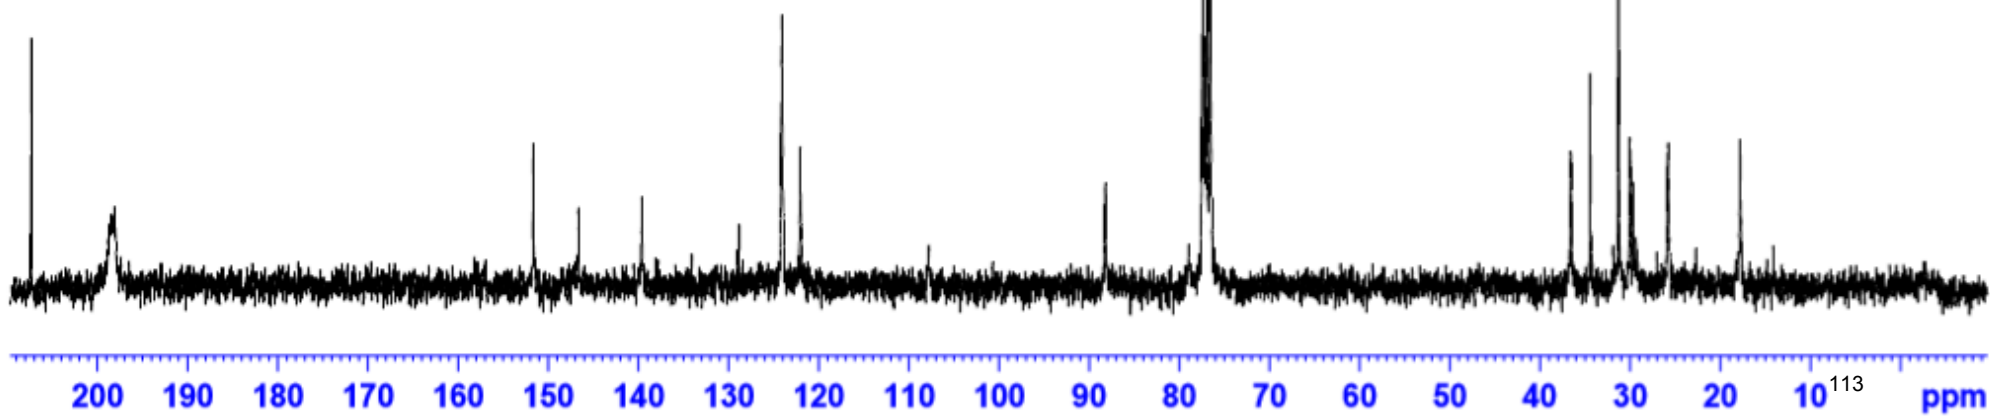

bs0.0605 1, p-MeO proparg Me cycliz prod, 300B82, 6/5/21

7.270  
7.079  
7.049  
6.789  
6.700  
6.690  
6.671  
6.660

4.682  
4.660

3.764

1.749  
1.715

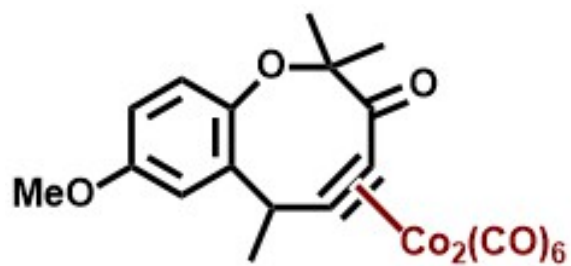

**7d**

300 MHz, CDCl<sub>3</sub>

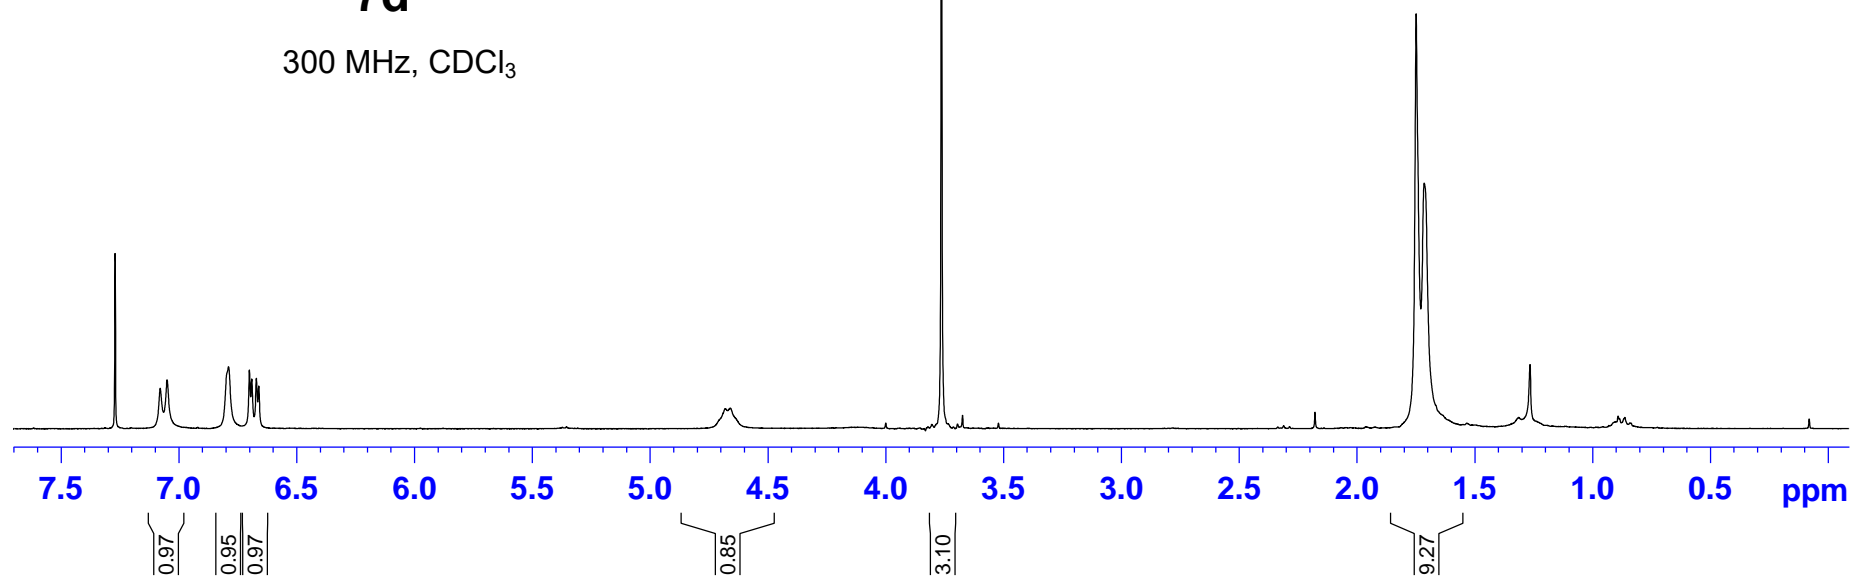

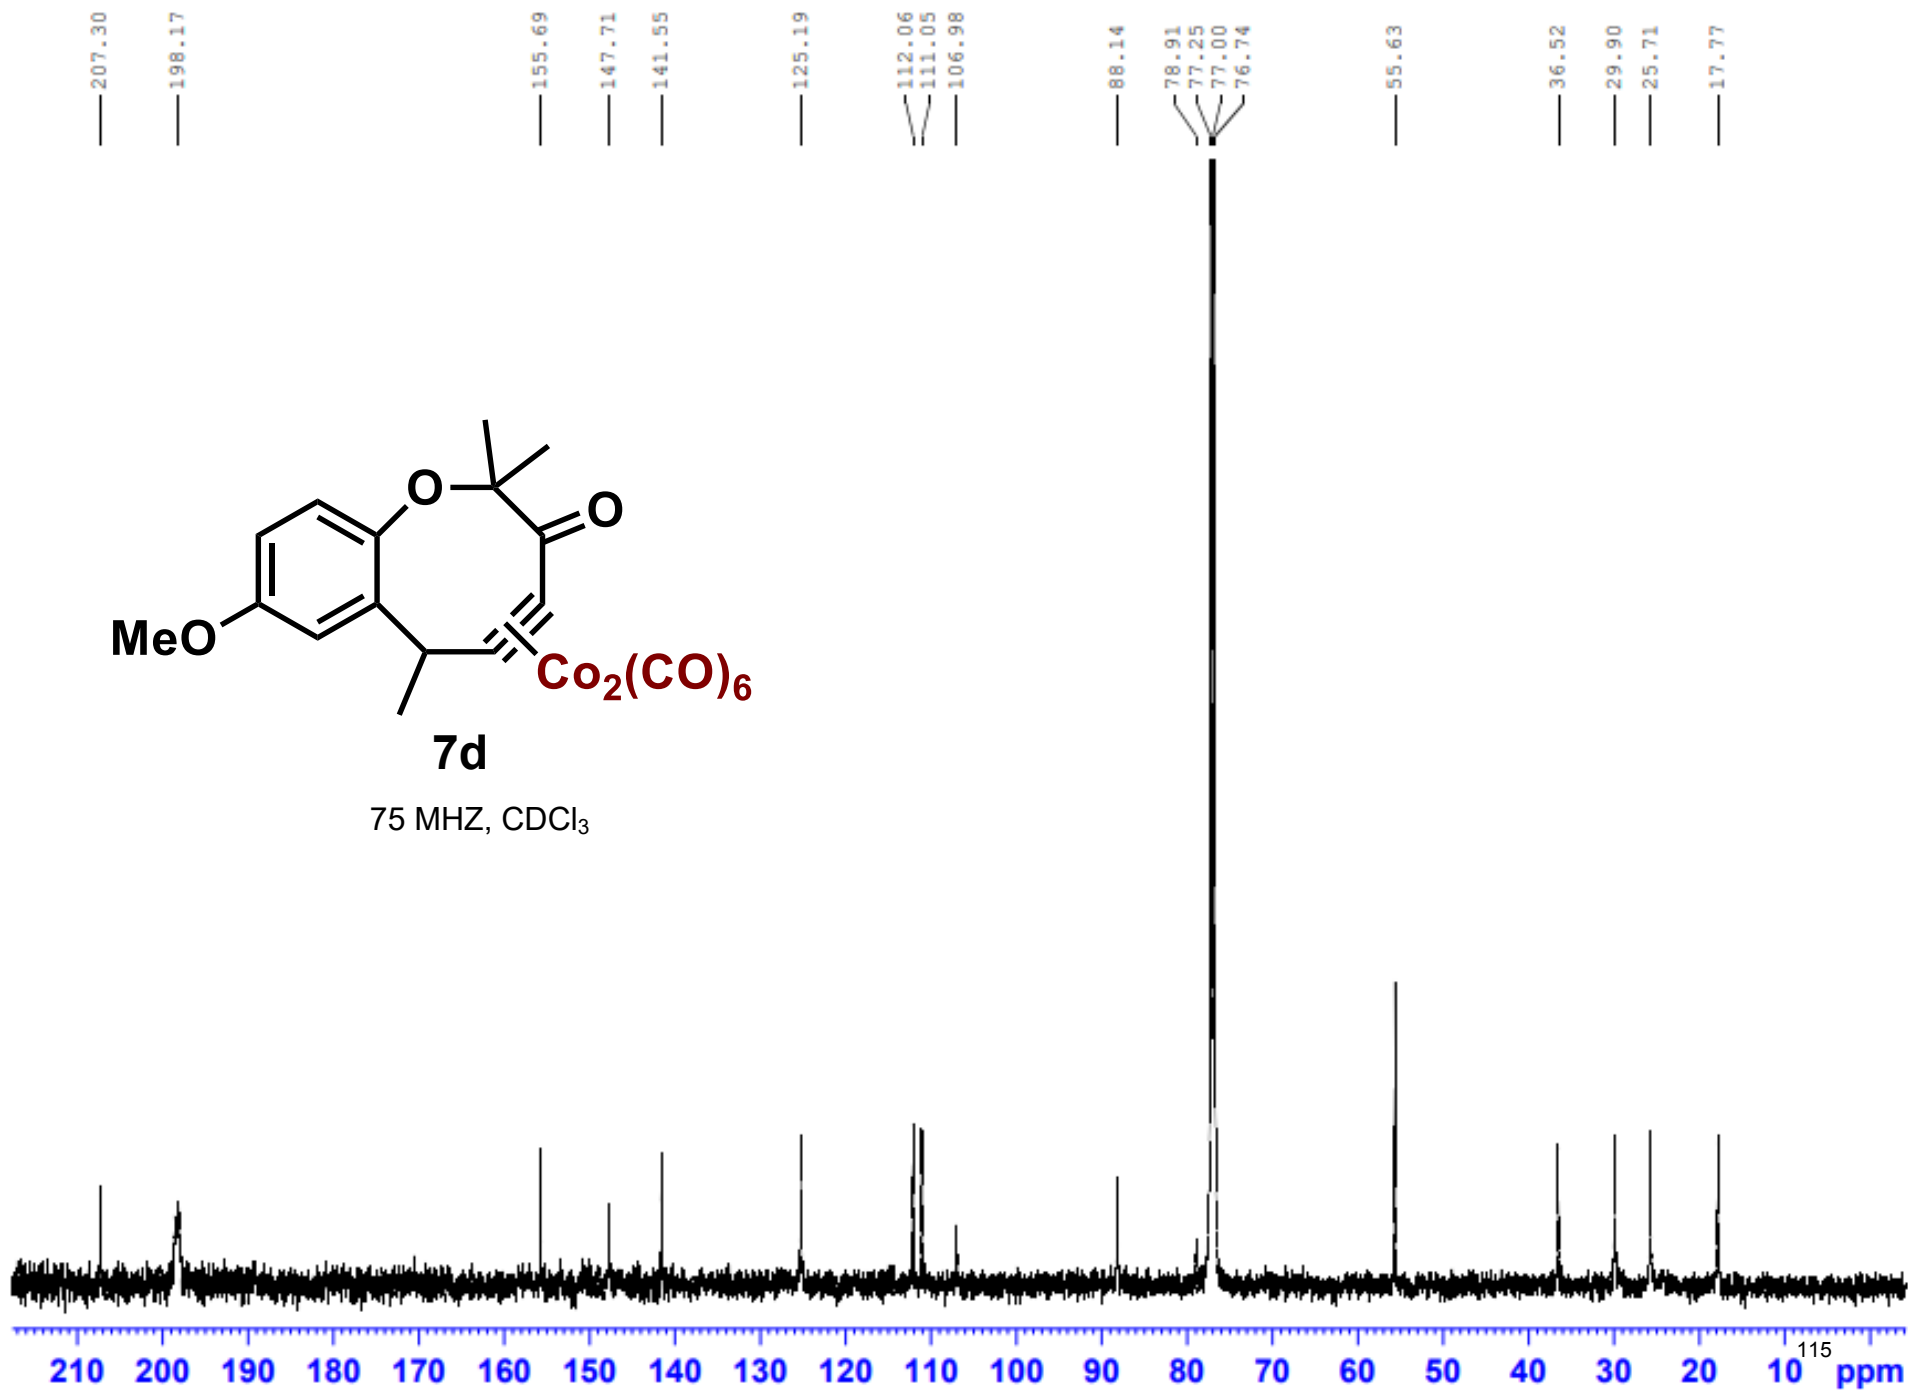

bs0.0603 3, m-Me-propargyl Me cycliz prod, again 6/6/21

7.270  
7.116  
7.090  
6.942  
6.863  
6.838

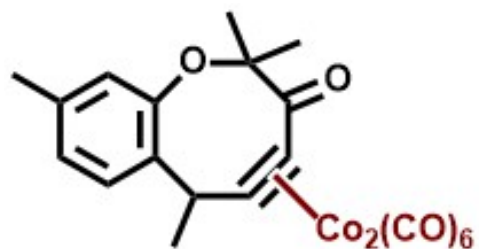

**7f**

300 MHz, CDCl<sub>3</sub>

2.285  
1.767  
1.744  
1.720

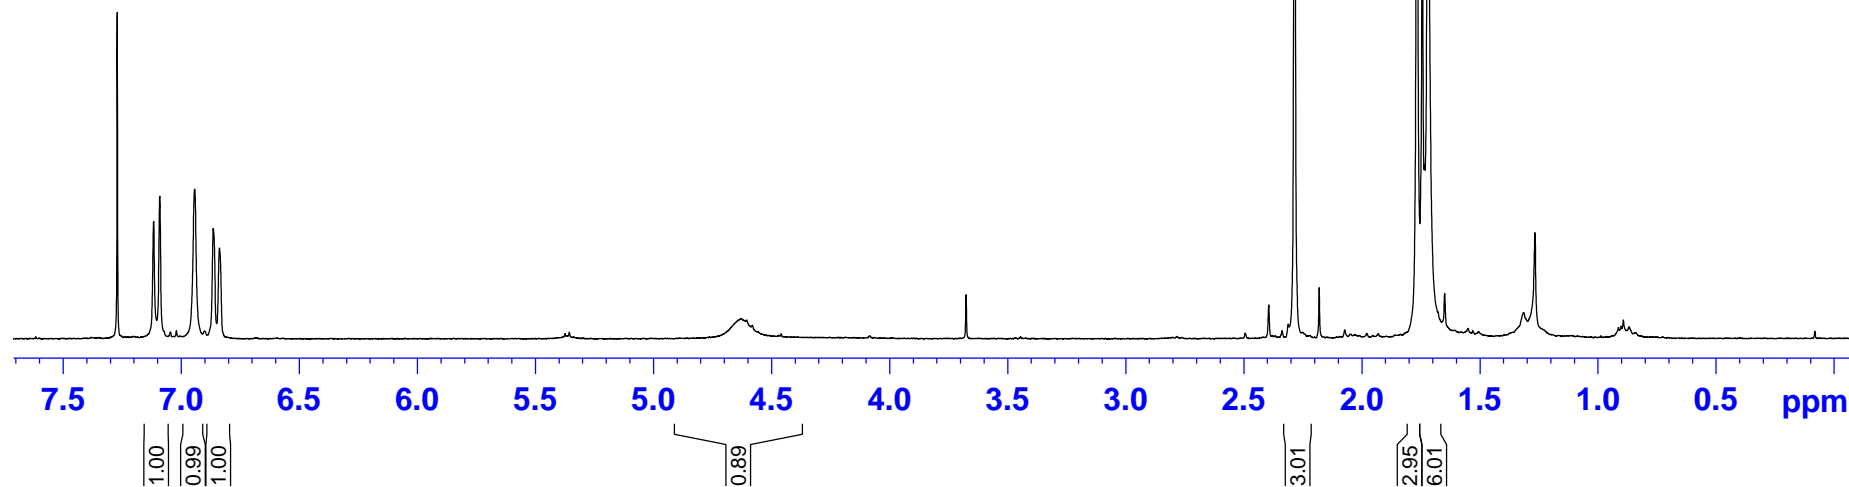





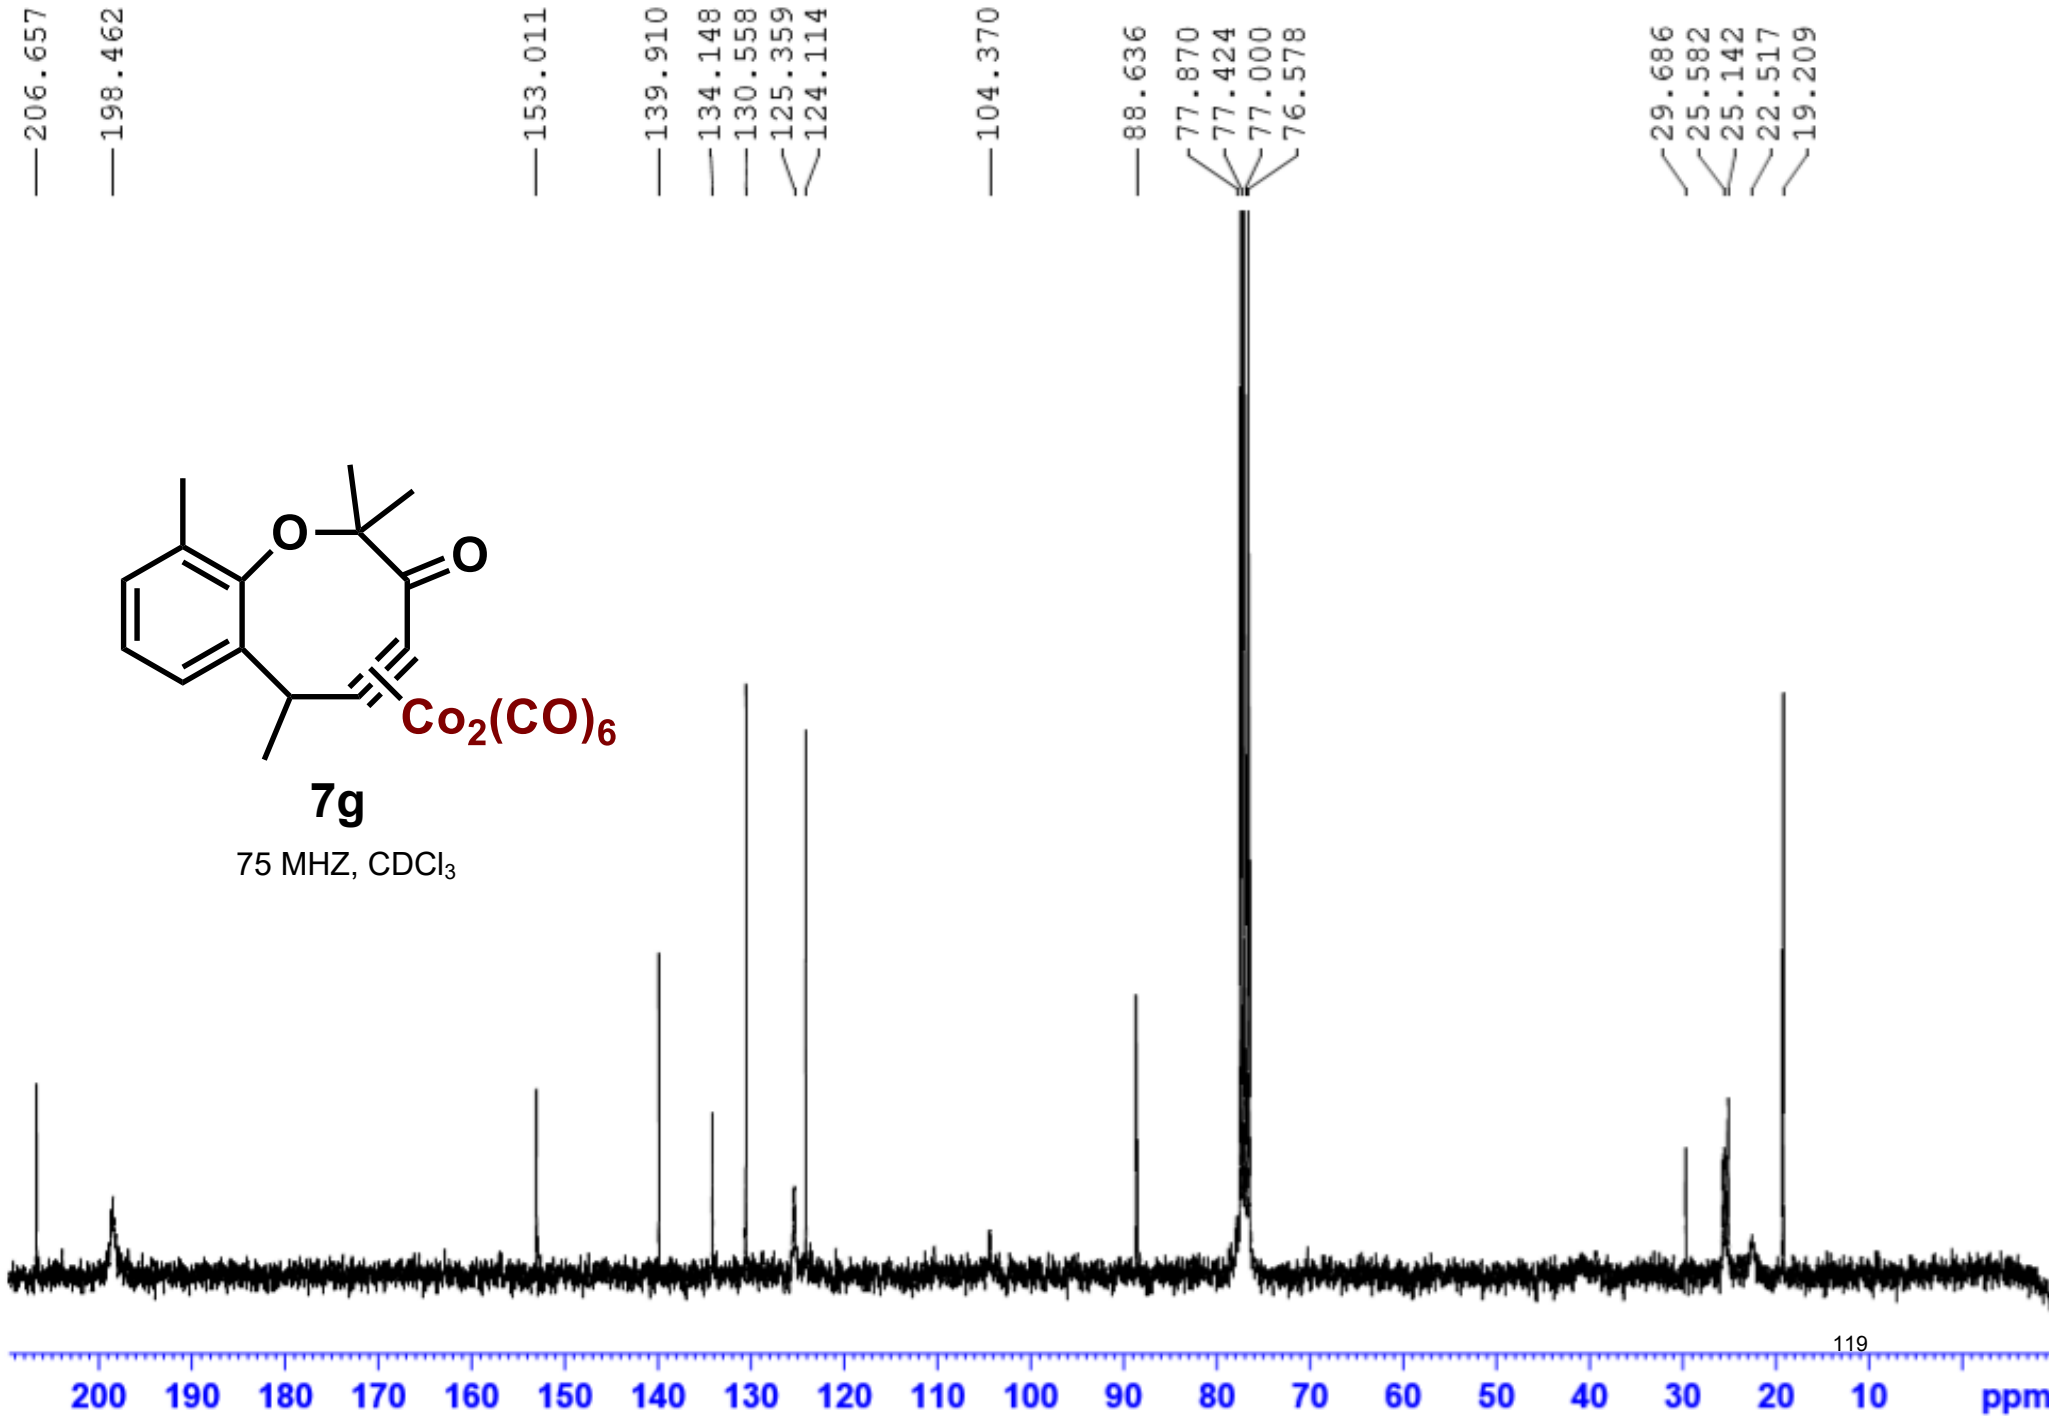

bso.161M-1 2-isopropyl

7.250  
7.237  
7.225  
7.219  
7.206  
7.195  
7.105  
7.080  
7.074  
7.061  
7.049

4.394

3.444  
3.421  
3.407  
3.398  
3.376  
3.353

1.573

1.213  
1.190

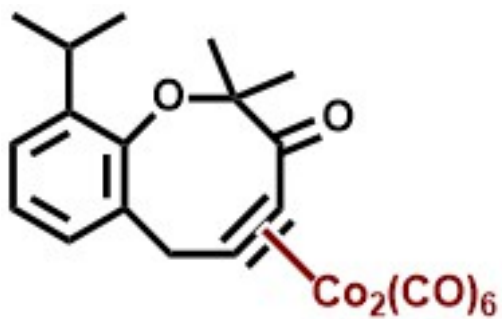

**7h**

300 MHz,  $\text{CDCl}_3$

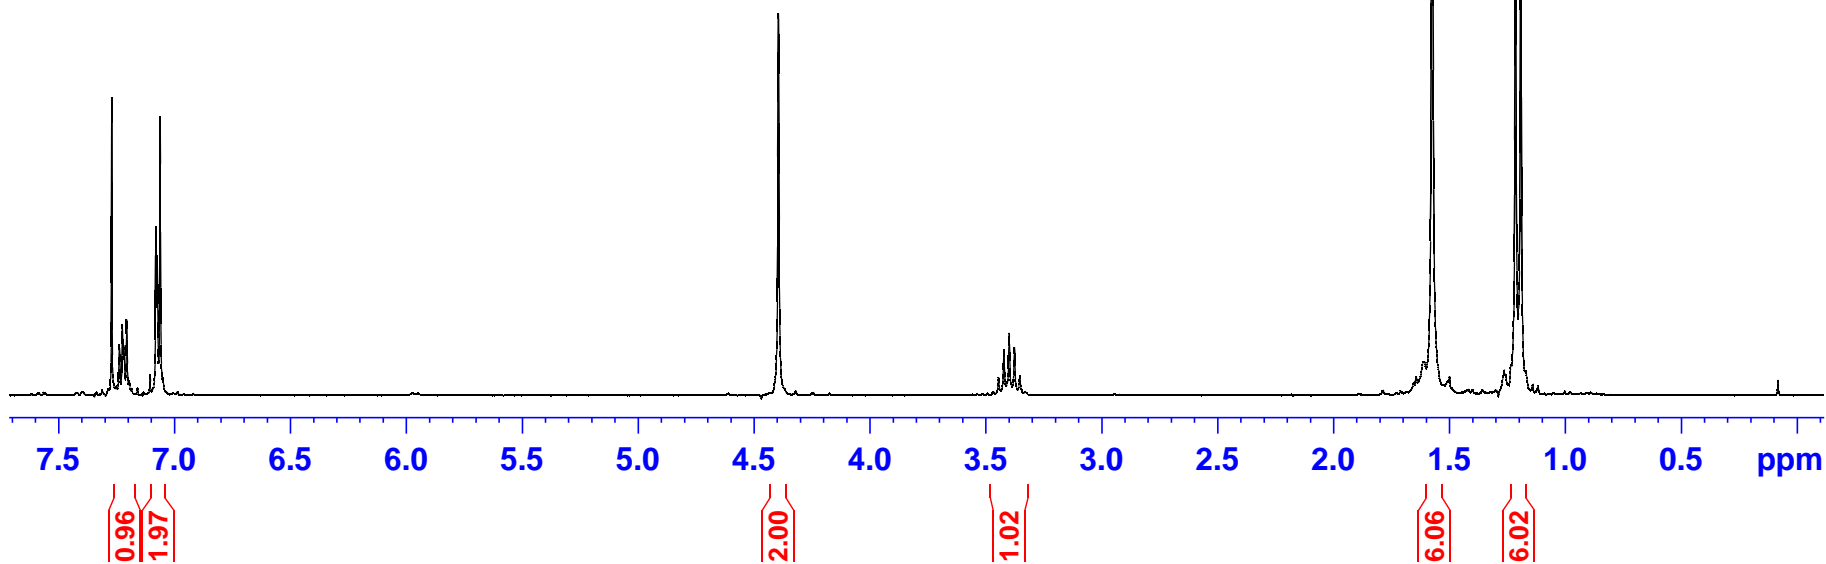





7.27  
7.18  
7.00

4.61

2.30

1.75  
1.73  
1.71

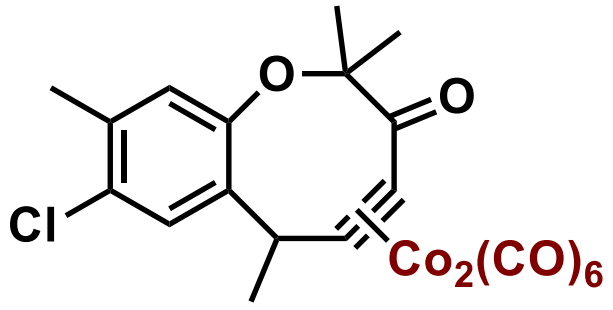

7i

300 MHz, CDCl<sub>3</sub>

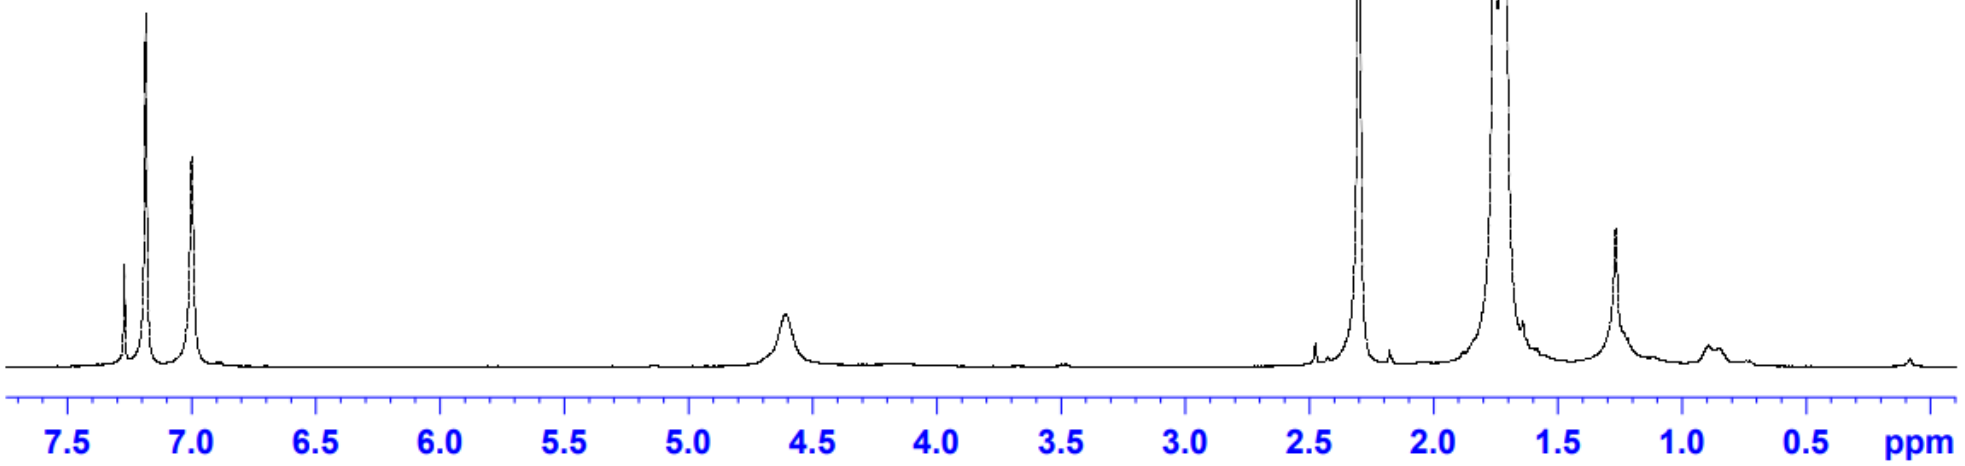

0.940  
0.933

0.865

3.000

9.207

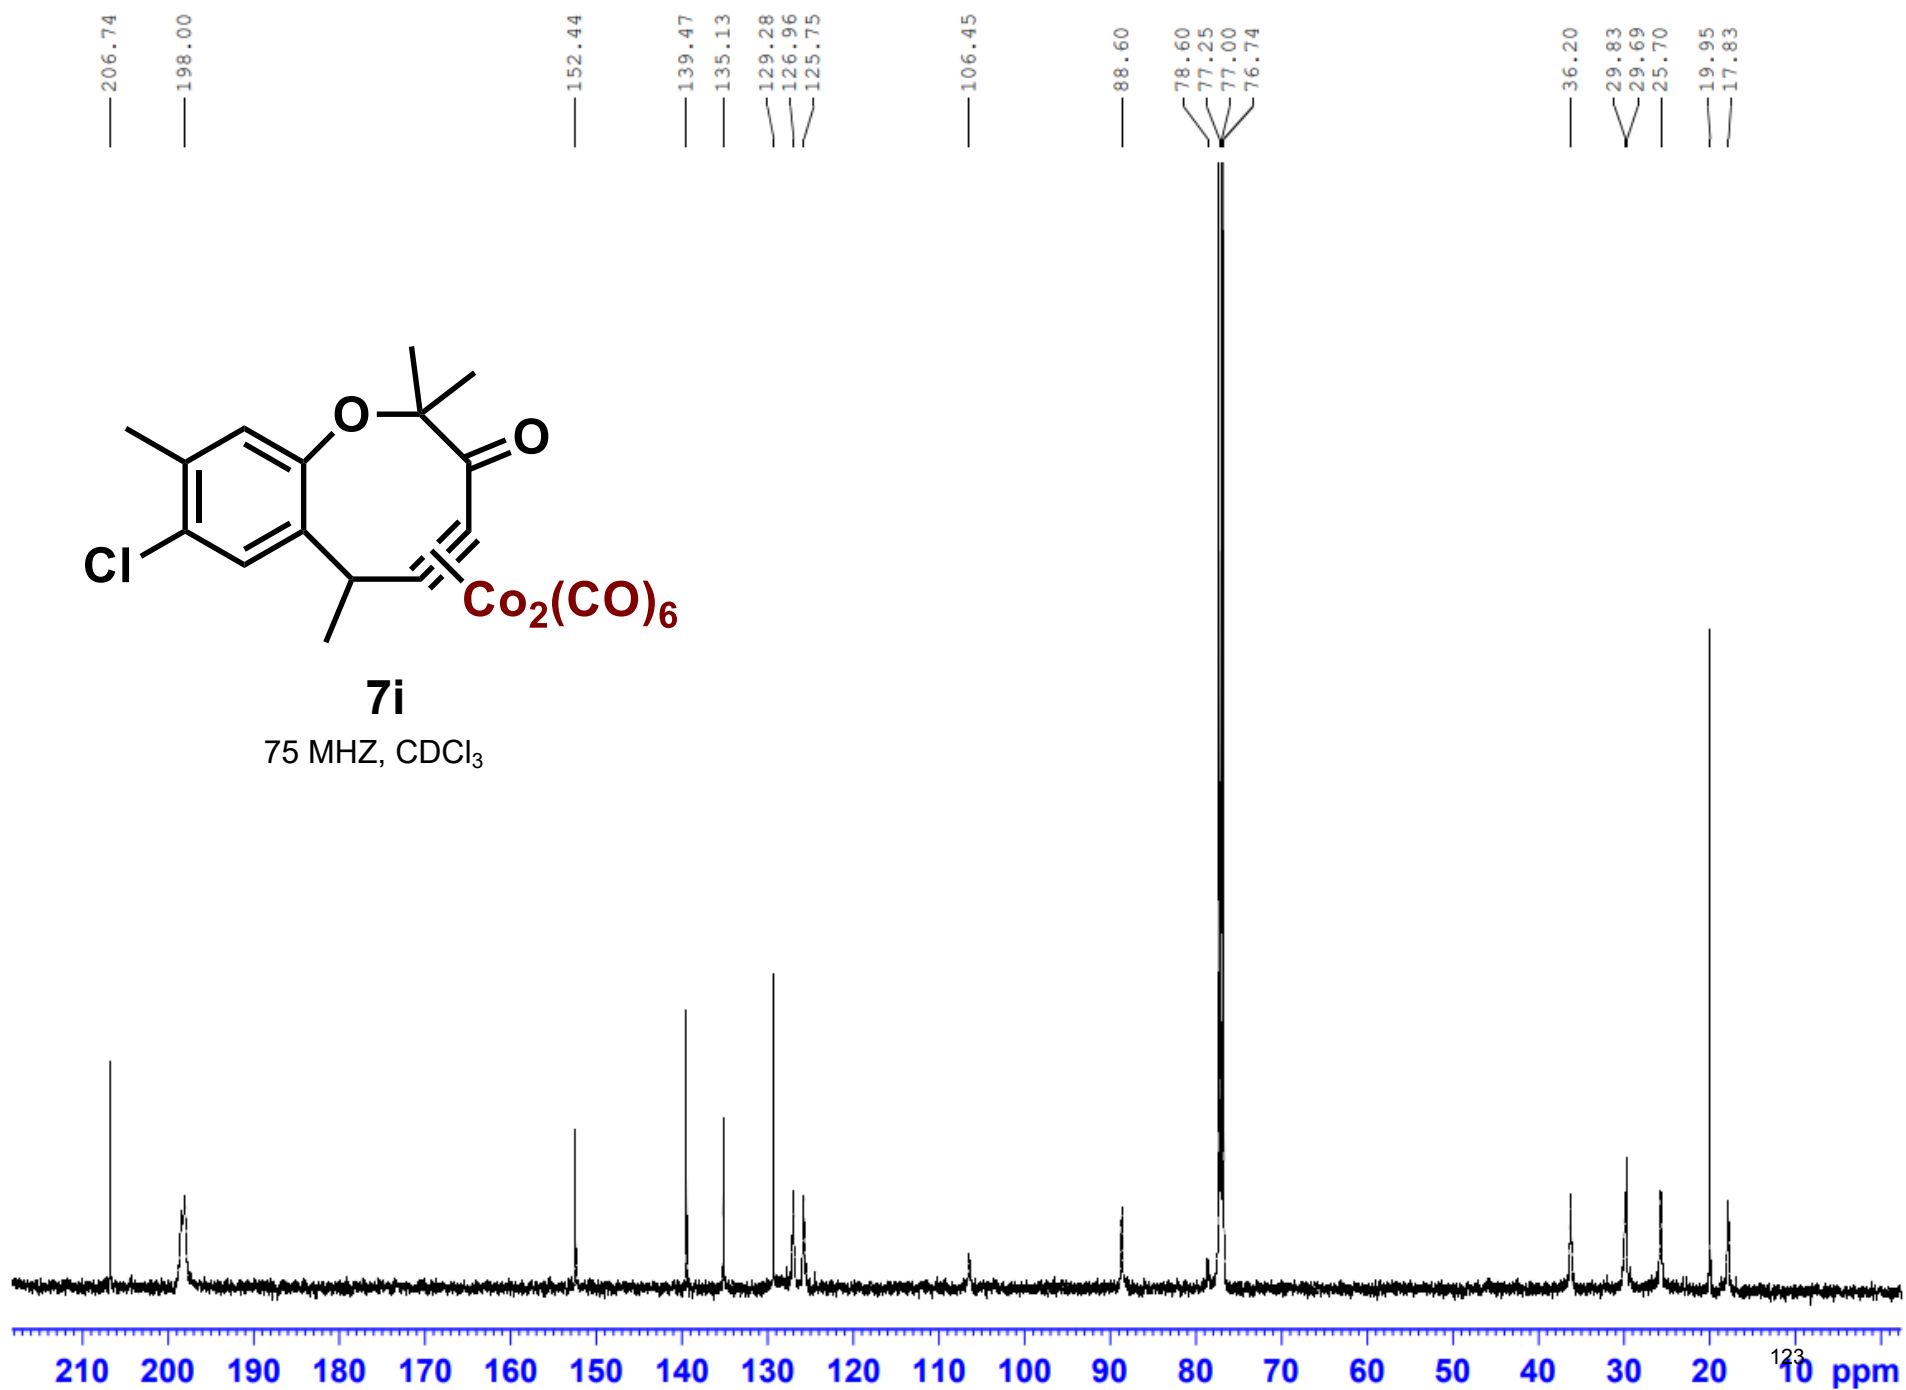

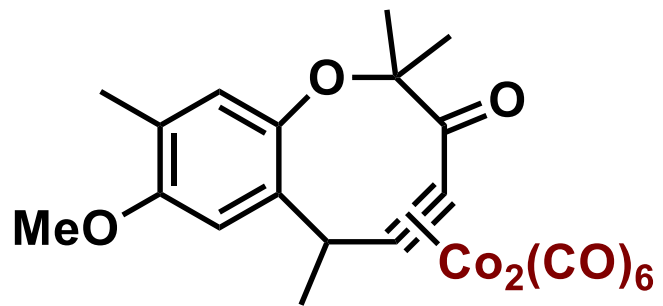

300 MHz, CDCl<sub>3</sub>

— 7.270  
— 6.921  
— 6.666

— 4.658

— 3.790

— 2.144  
— 1.745  
— 1.726  
— 1.701

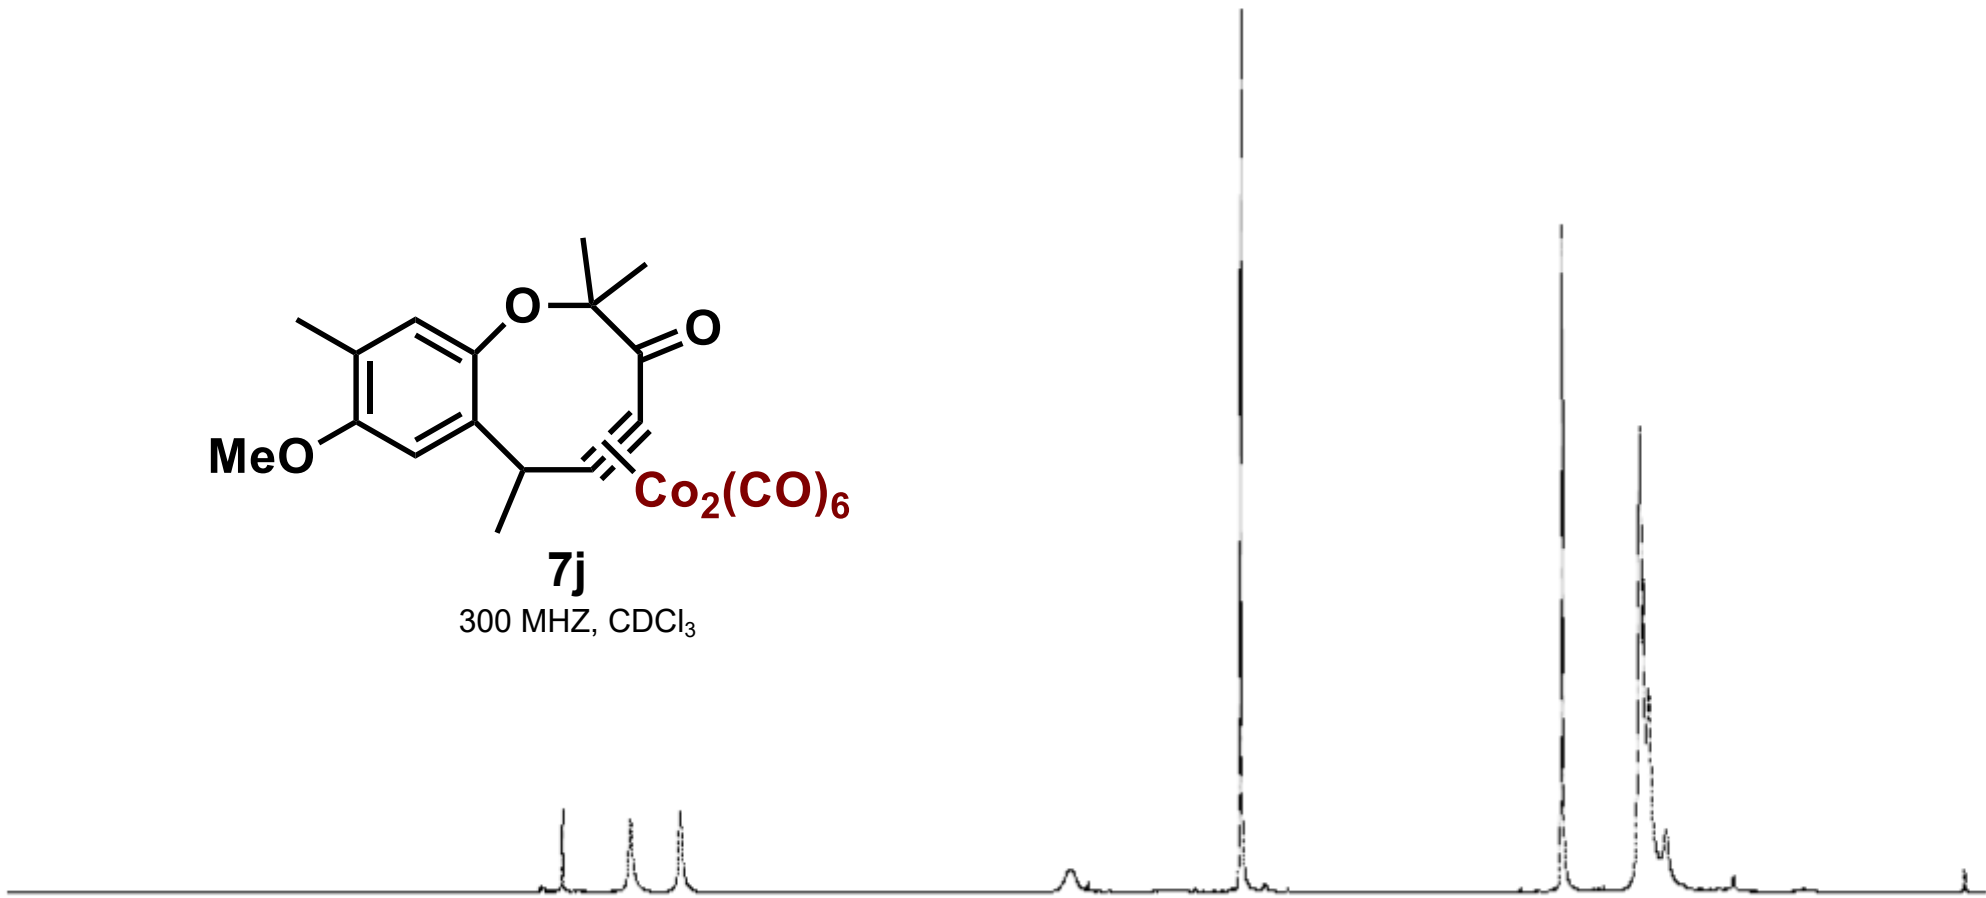

9.5 9.0 8.5 8.0 7.5 7.0 6.5 6.0 5.5 5.0 4.5 4.0 3.5 3.0 2.5 2.0 1.5 1.0 ppm

1.03  
1.06

0.83

3.18

3.13

10.35

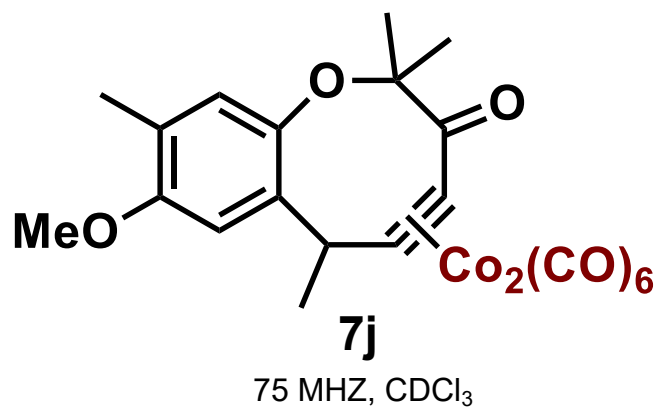

- 207.383
- 198.228
- 153.883
- 147.211
- 138.342
- 126.944
- 126.915
- 125.570
- 107.469
- 87.834
- 77.423
- 77.000
- 76.577
- 55.910
- 36.483
- 29.973
- 25.789
- 17.957
- 15.956

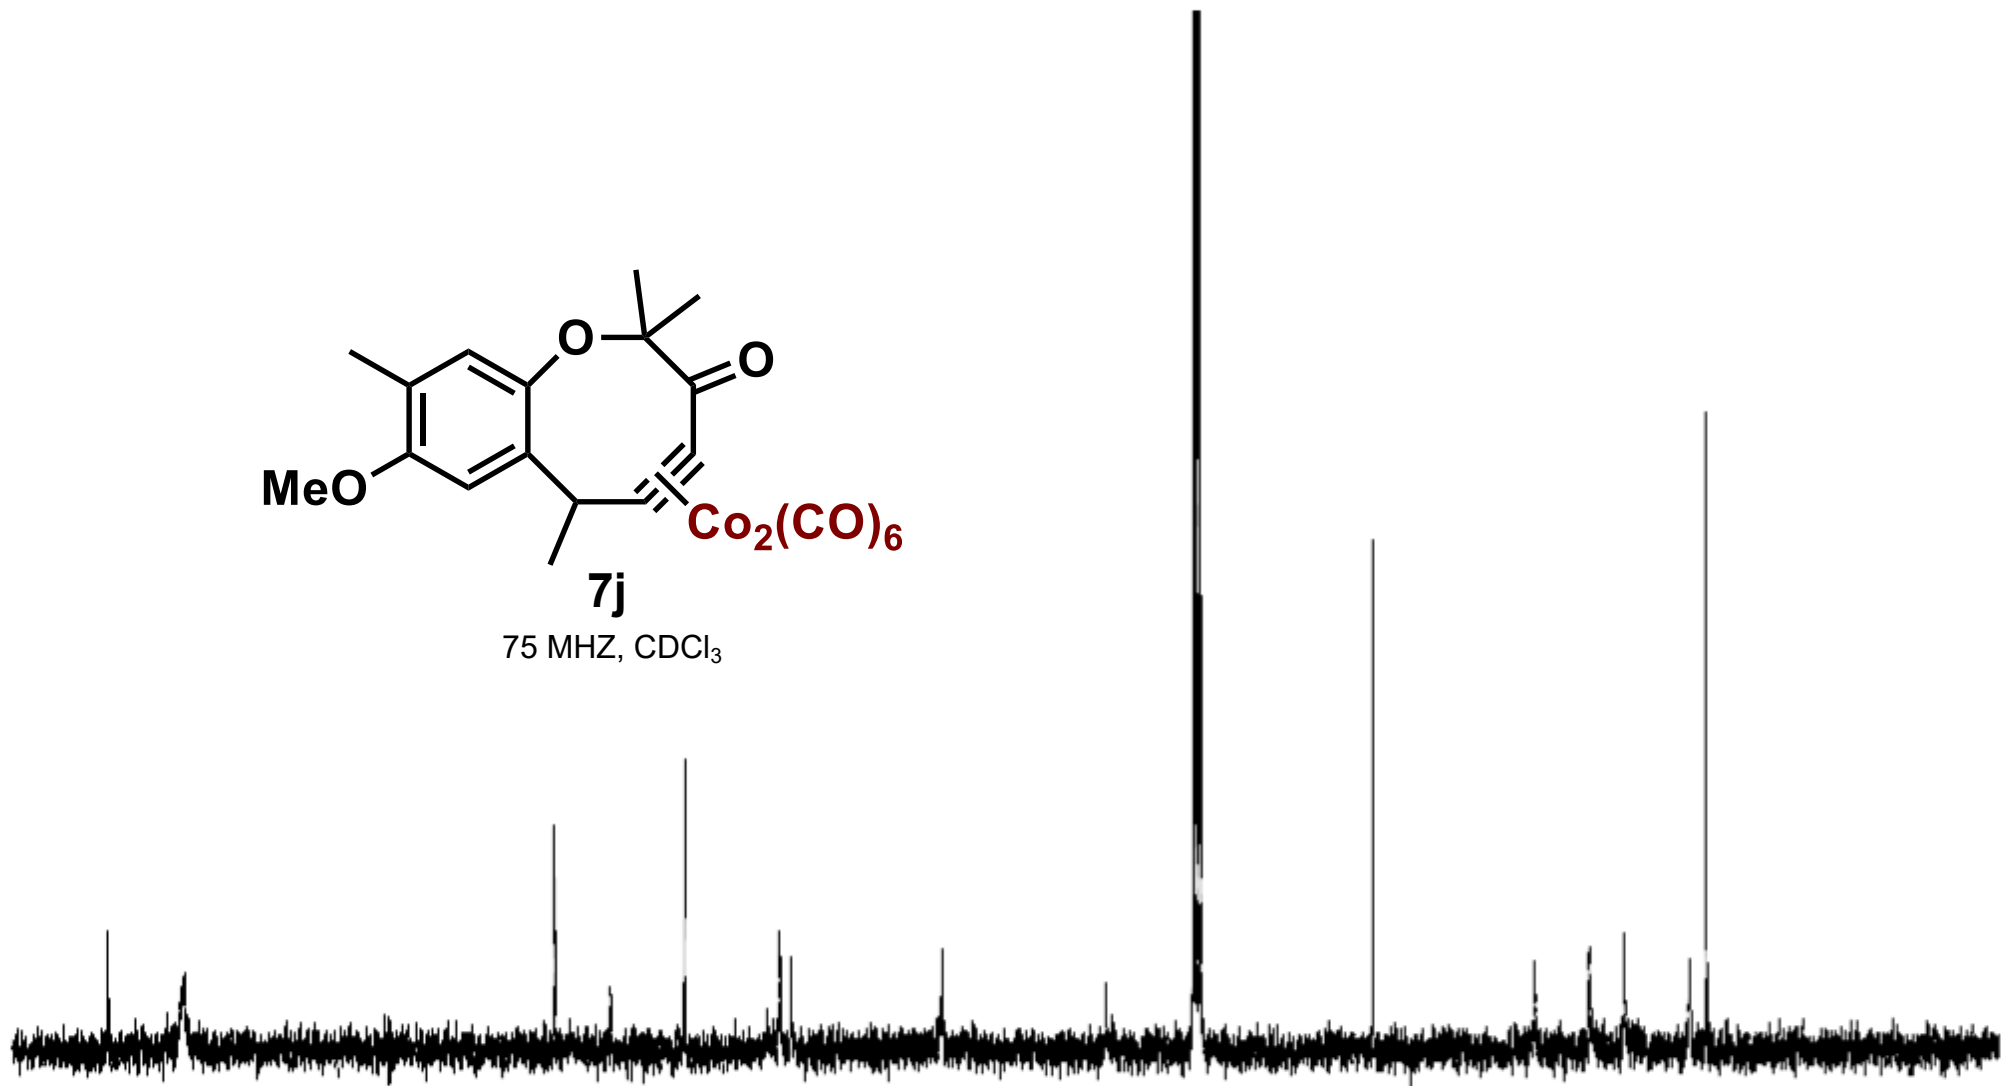

210 200 190 180 170 160 150 140 130 120 110 100 90 80 70 60 50 40 30 20 10 0 ppm

7.270  
7.168  
7.160  
7.141  
7.133  
7.124  
7.116  
6.918  
6.891  
6.081  
6.060

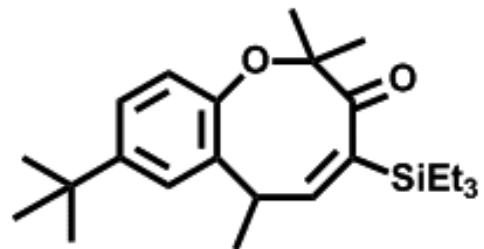

**11cc**

300 MHz, CDCl<sub>3</sub>

3.700

1.496  
1.473  
1.457  
1.448  
1.296  
1.272  
0.961  
0.935  
0.909  
0.671  
0.664  
0.647  
0.638

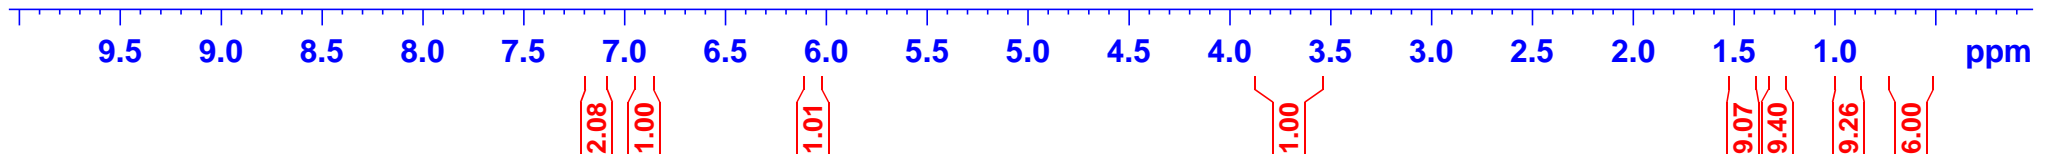

— 210.816

— 151.877  
— 147.654  
— 147.474  
— 139.435  
— 135.218  
— 124.211  
— 124.132  
— 124.101

— 85.871  
— 77.423  
— 77.000  
— 76.577

— 40.227  
— 34.440  
— 31.501  
— 26.473  
— 23.470  
— 19.048

— 7.132  
— 3.546

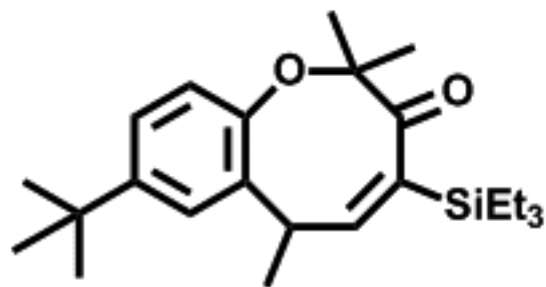

**11cc**

75 MHz, CDCl<sub>3</sub>

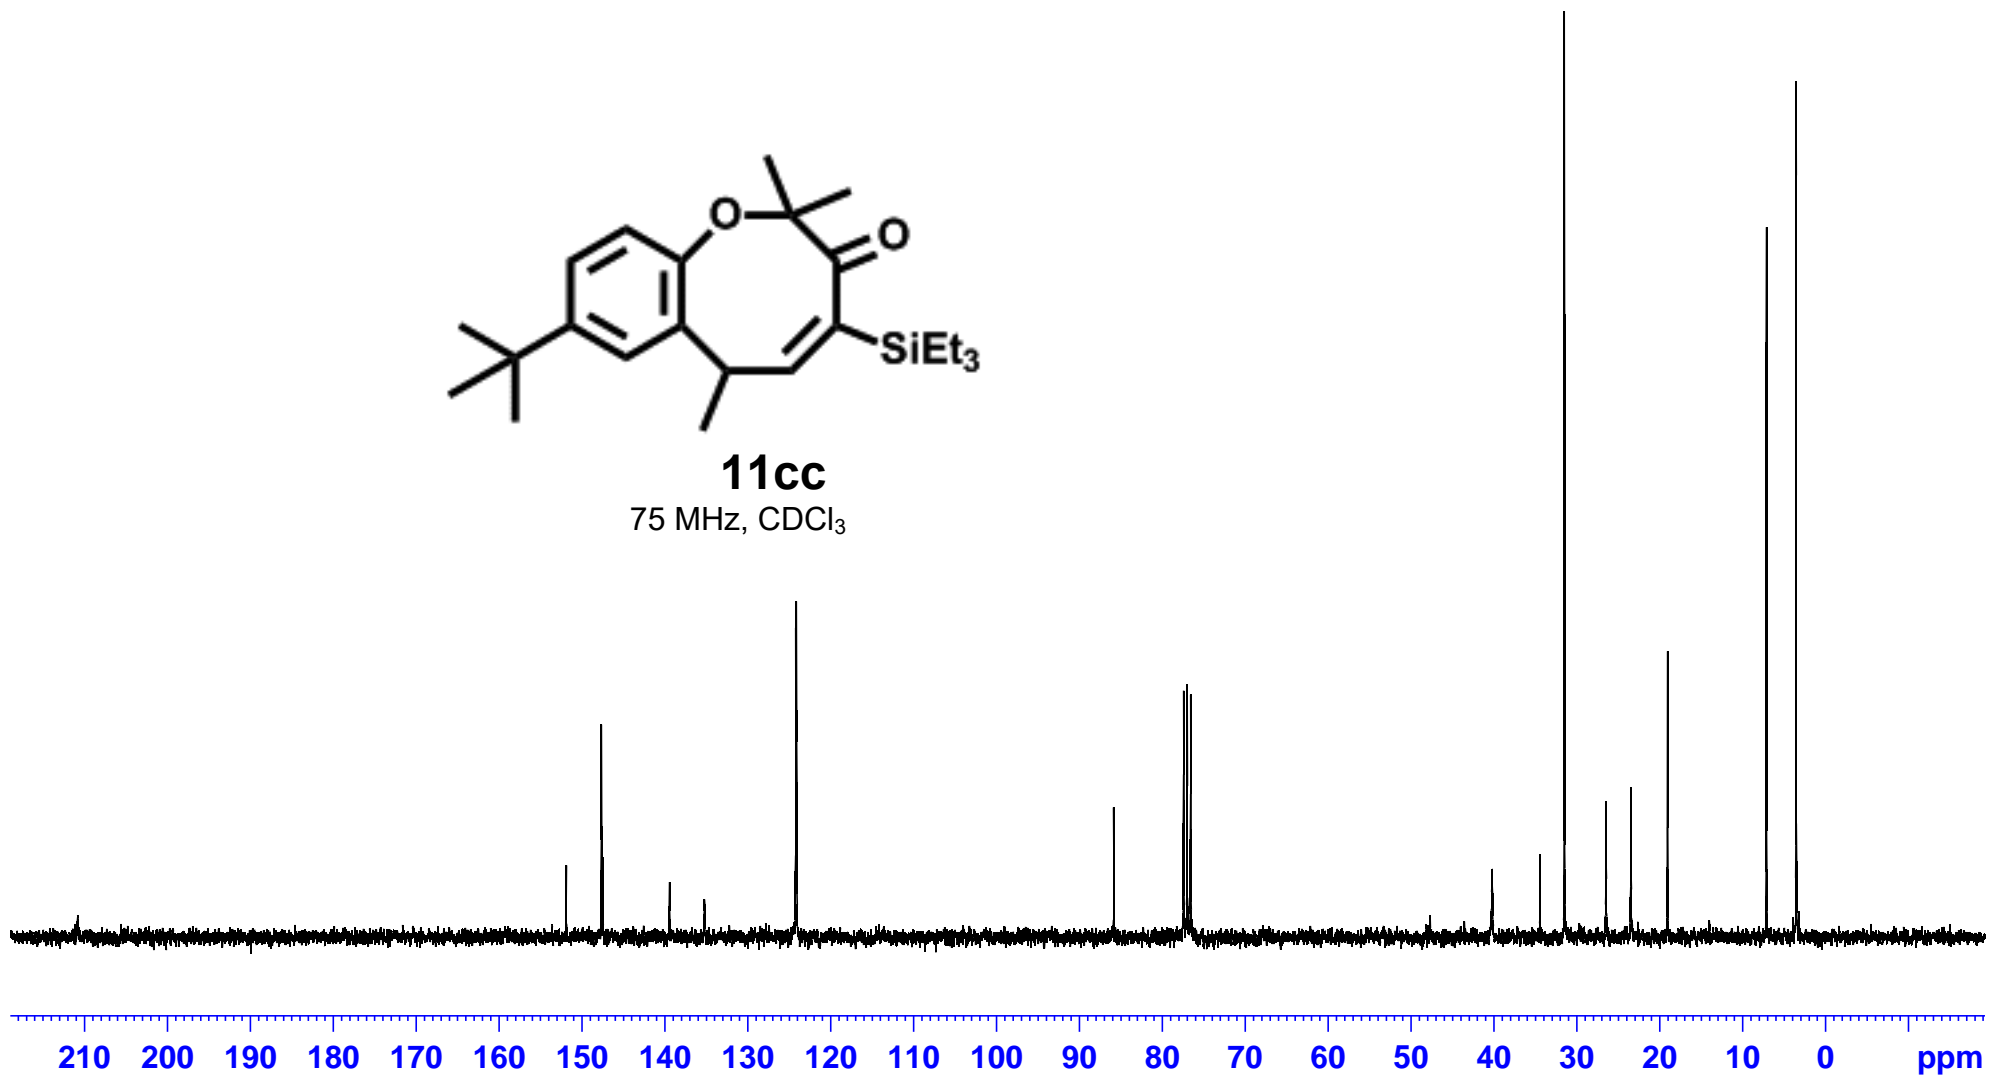

bs0.0420 1, brent purple cap tube, hydrosilyln prod, 4/20/21

7.270

6.788

6.552

6.095  
6.075

5.300

3.790

2.150

1.493

1.469

1.460

1.437

0.963

0.937

0.911

0.666

0.661

0.642

0.635

0.617

0.608

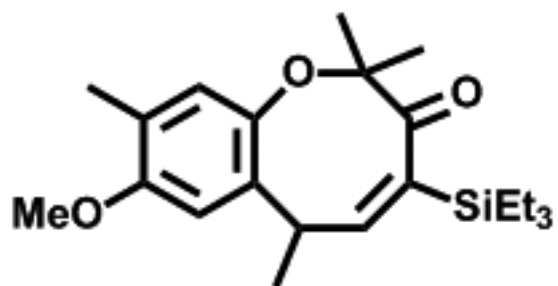

**11j**

300 MHz, CDCl<sub>3</sub>

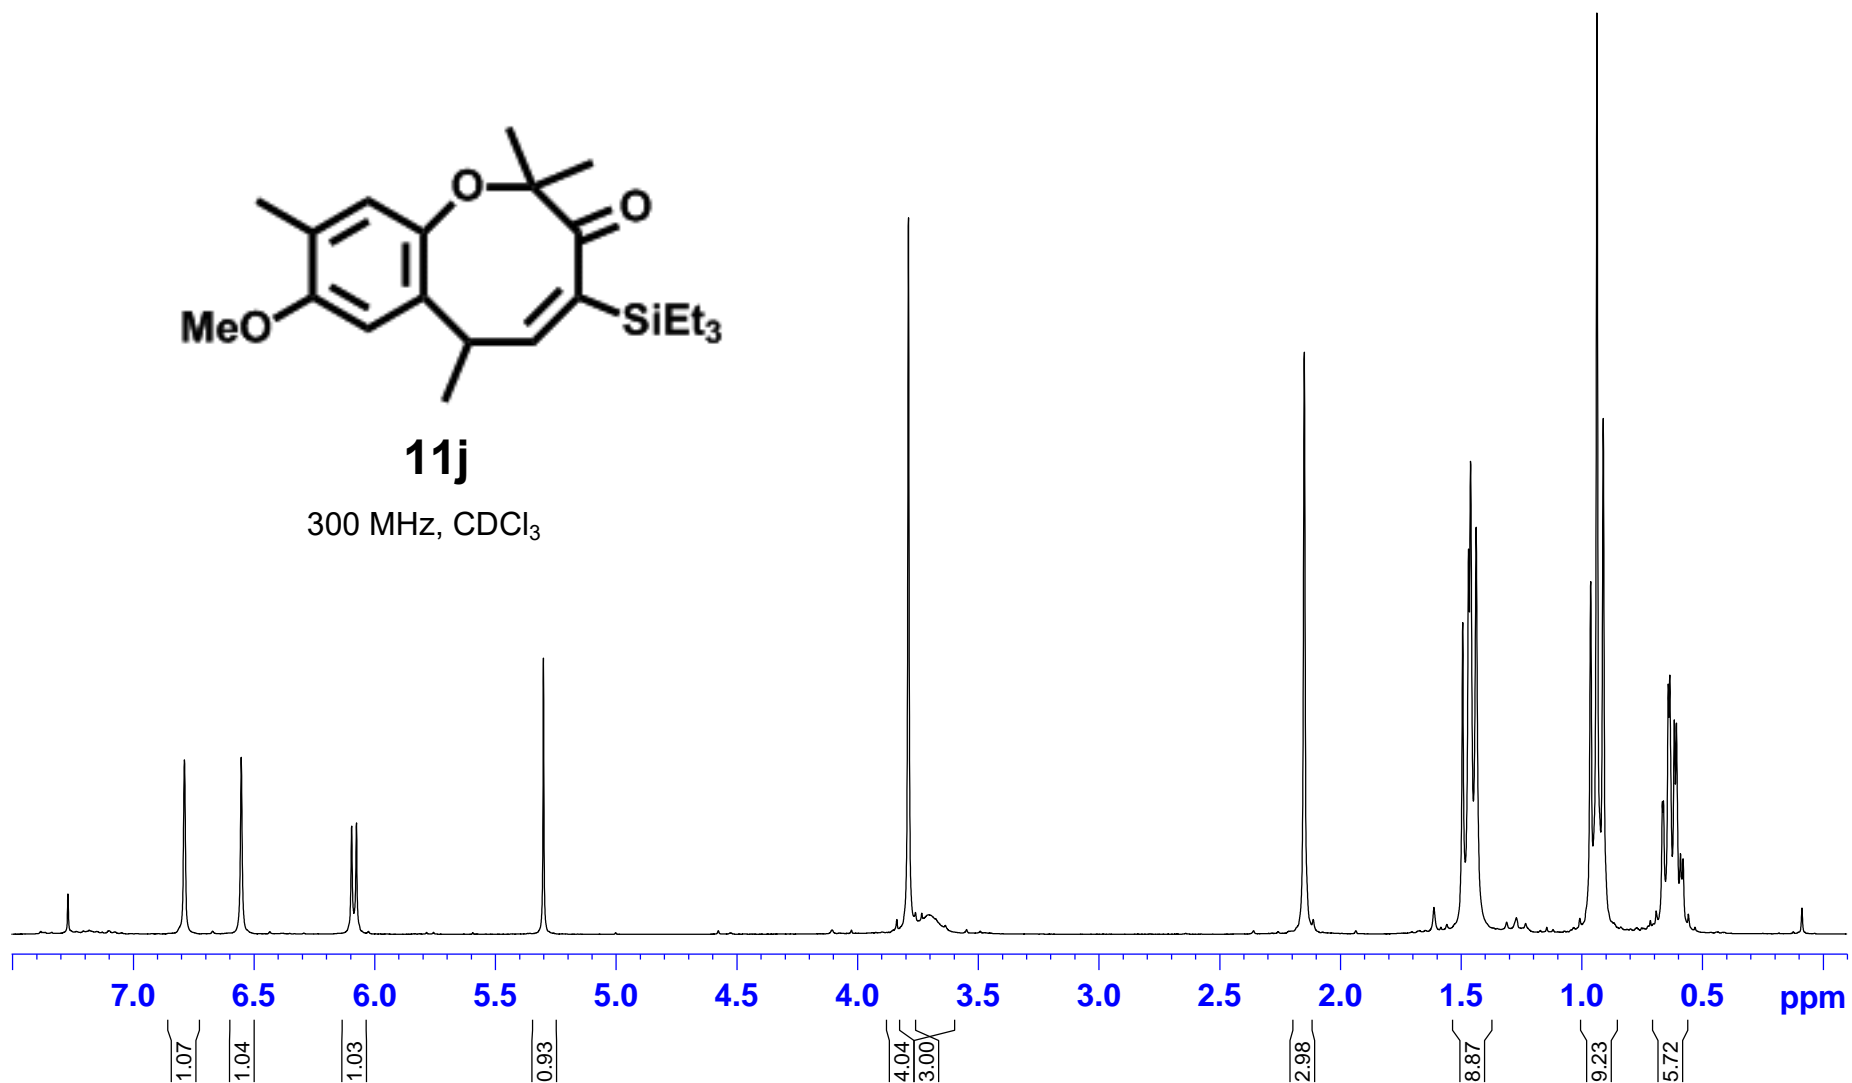



— 210.560

— 154.727

— 147.389

— 139.597

— 133.971

— 128.383

— 126.862

— 125.499

— 109.096

— 85.832

— 77.423

— 77.000

— 76.577

— 55.691

— 40.107

— 29.692

— 26.119

— 23.576

— 19.144

— 15.698

— 7.153

— 3.521

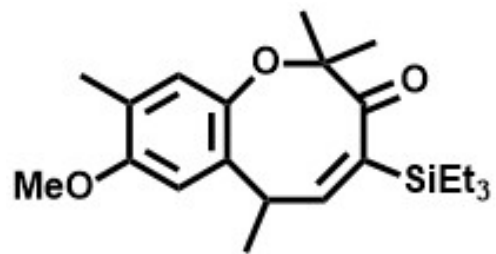

**11j**

75 MHz, CDCl<sub>3</sub>

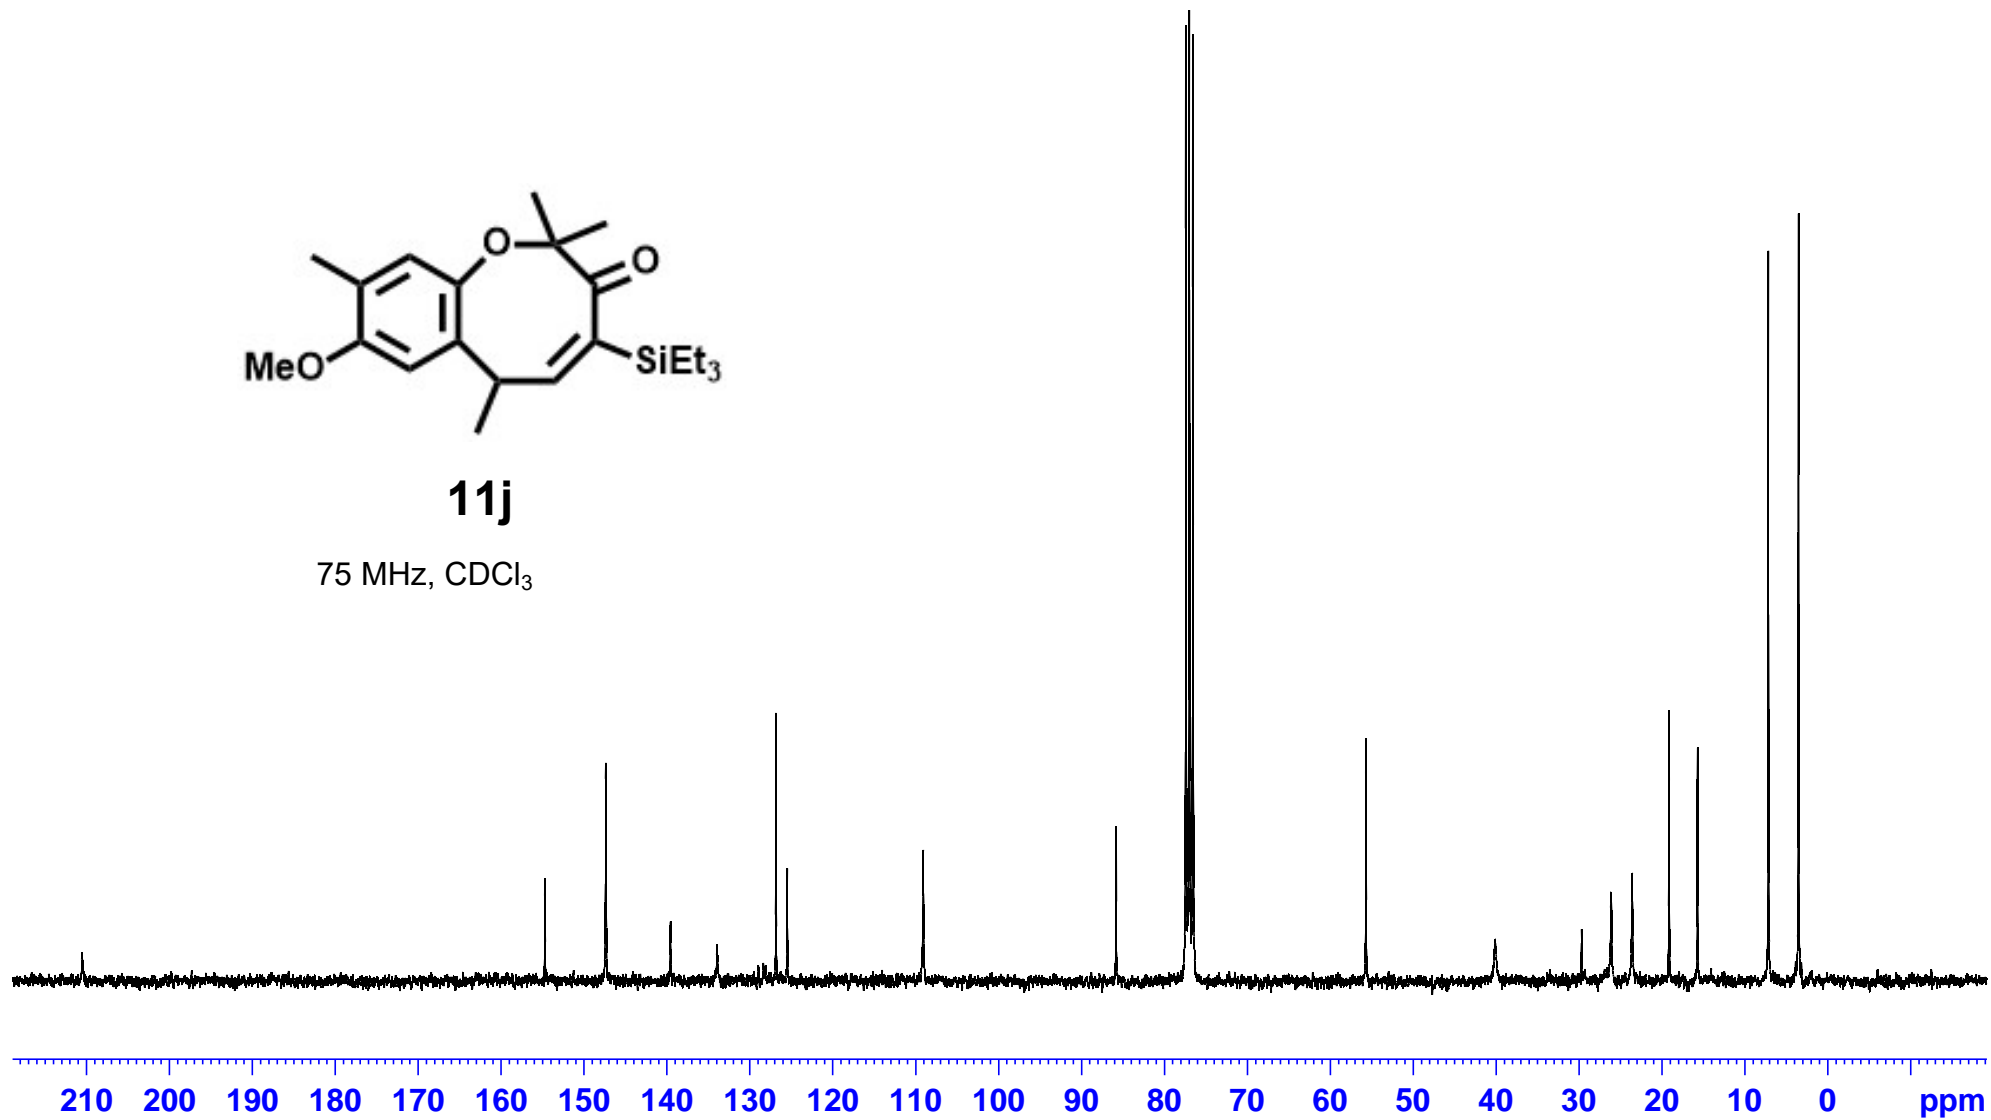

bs0.0510 5, deconj ketone formal synth, 1H, 5/10/21

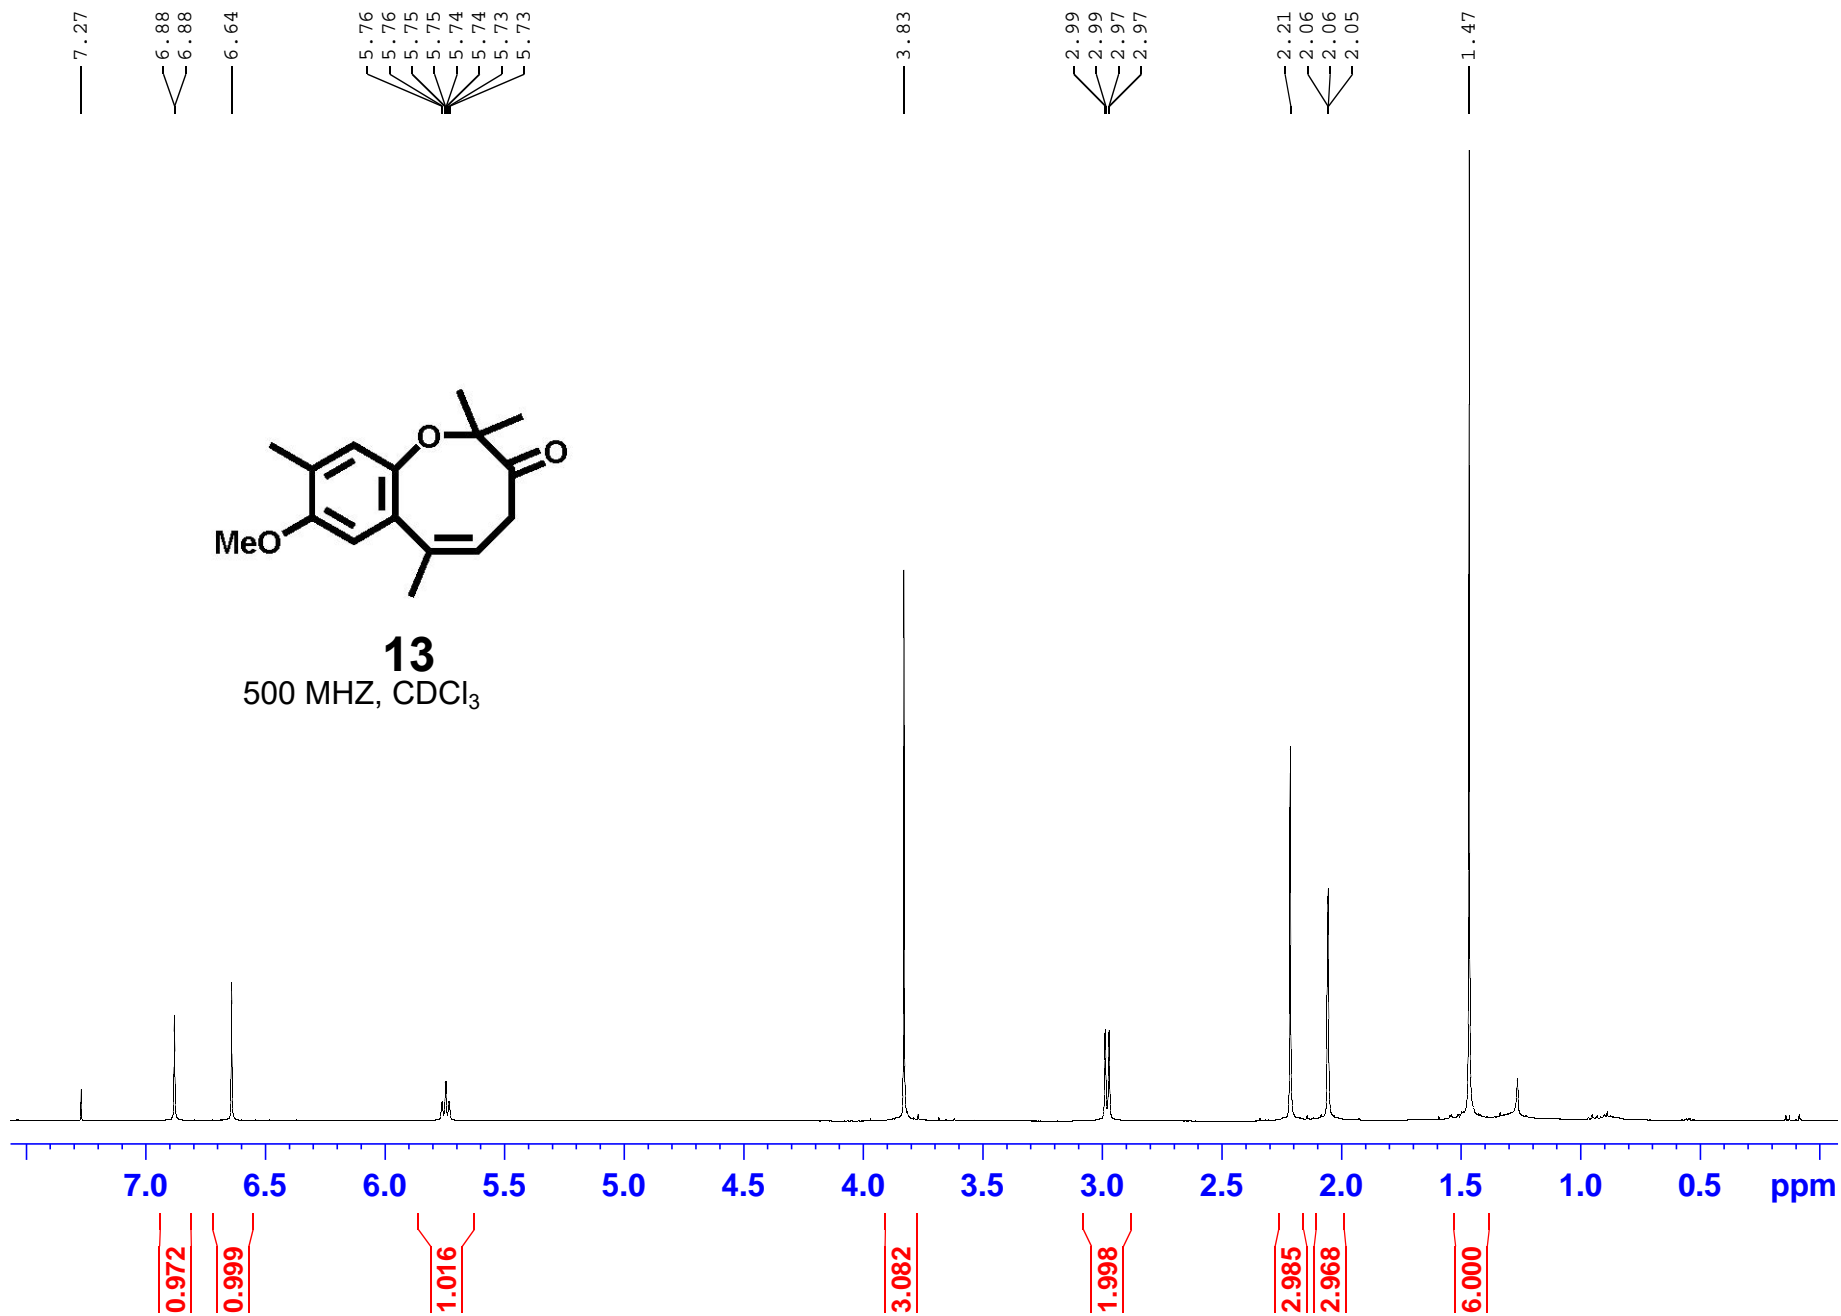

bs0.0505 2, 13C, deconj enone, formal synth, 5/5/21

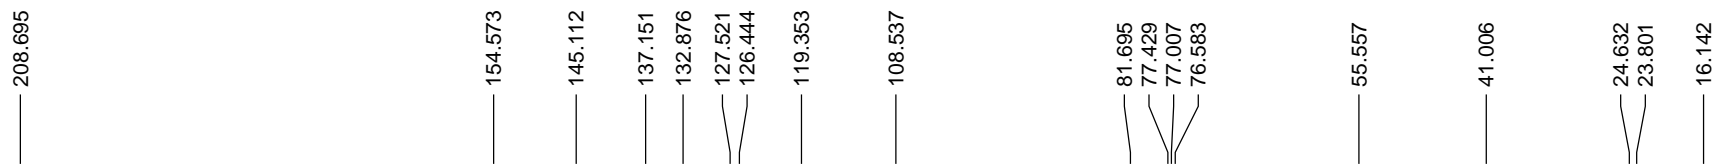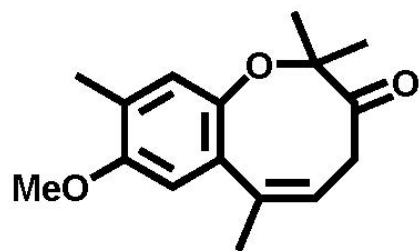

**13**

75 MHz, CDCl<sub>3</sub>

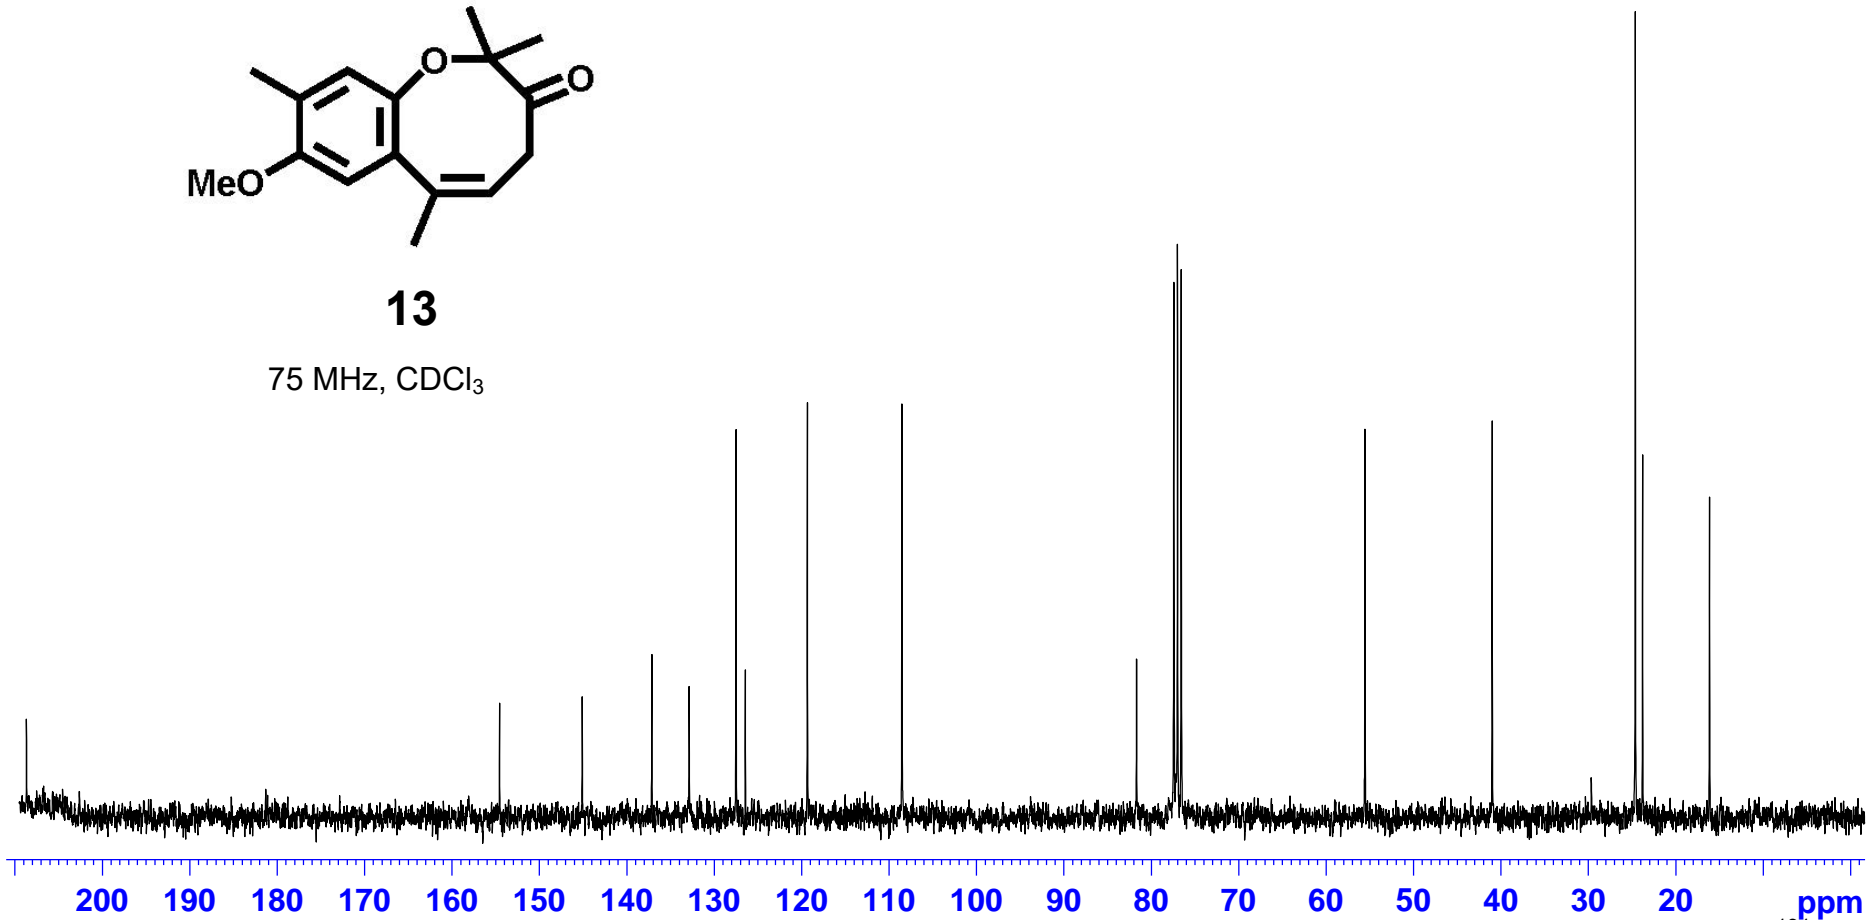

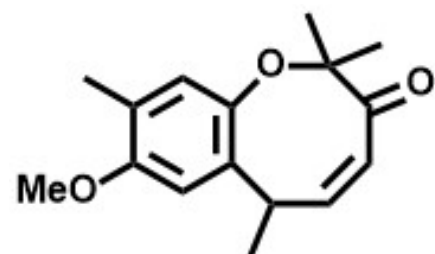

**14**

300 MHz, CDCl<sub>3</sub>

7.270  
6.855  
6.559  
6.263  
6.246  
6.220  
6.203  
5.796  
5.789  
5.753  
5.746

3.880  
3.780

2.158  
1.554  
1.542  
1.525  
1.500

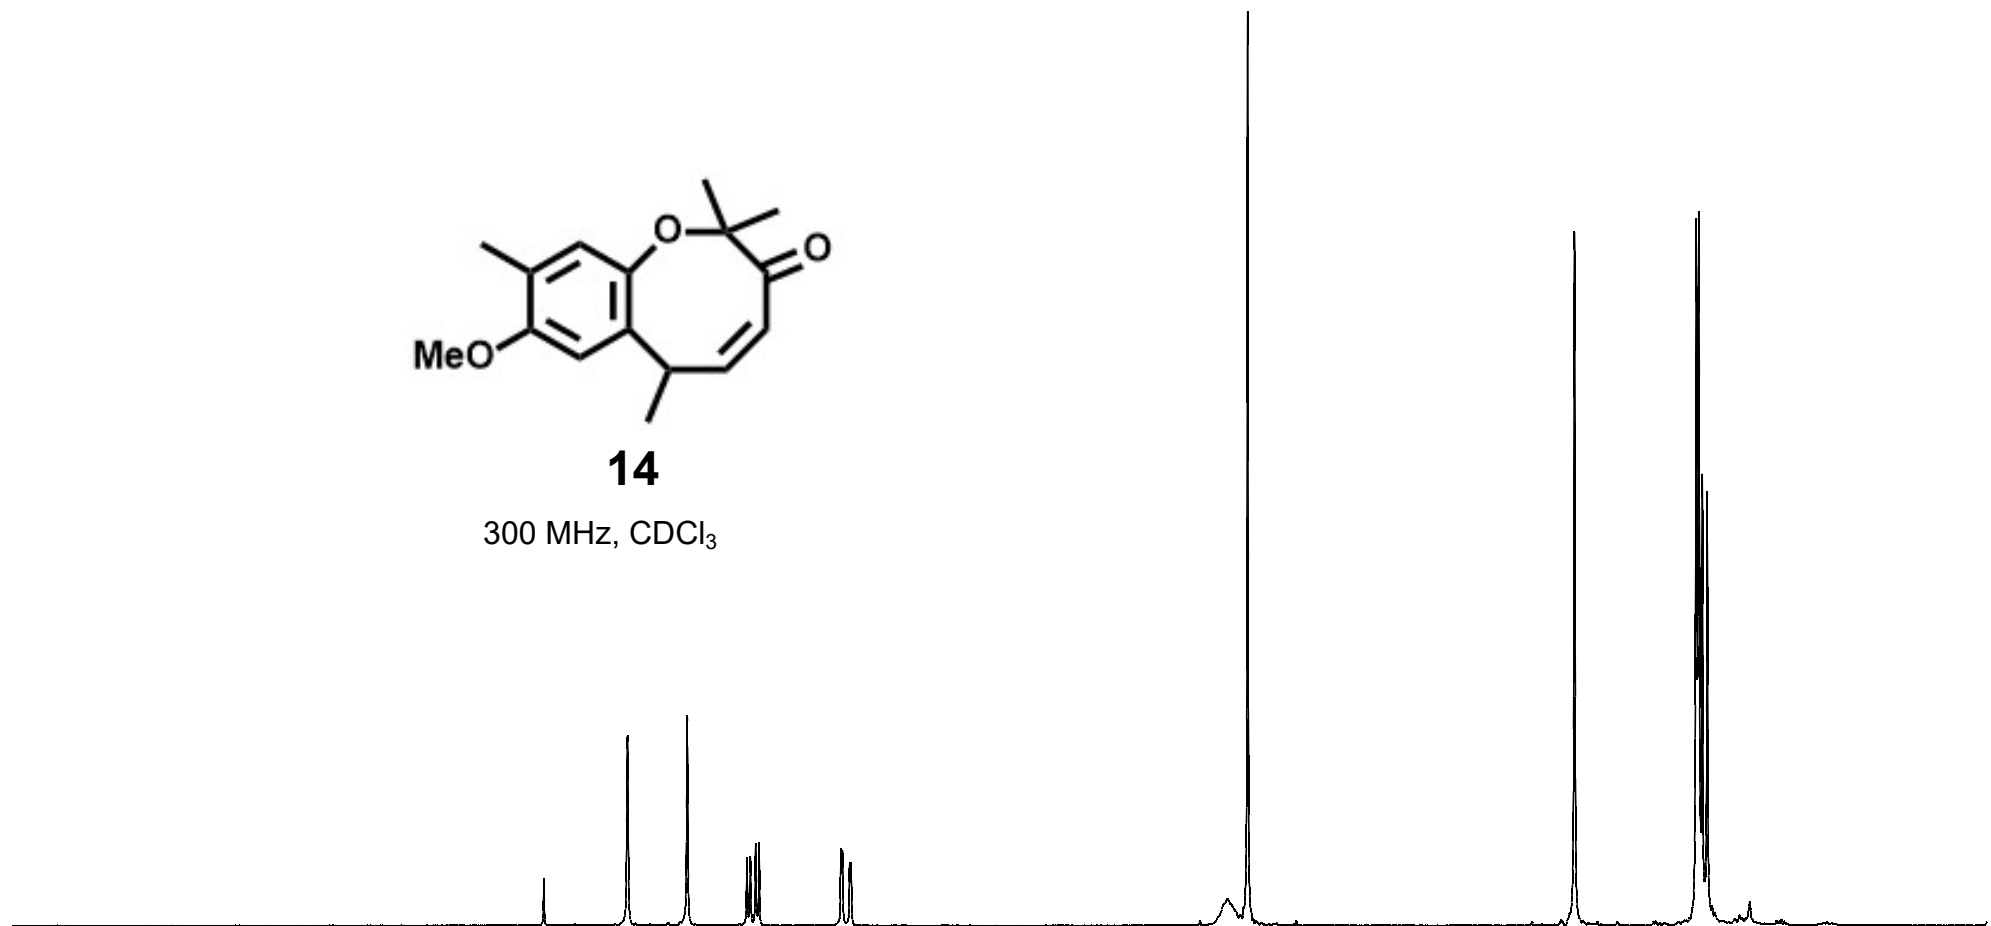

9.5 9.0 8.5 8.0 7.5 7.0 6.5 6.0 5.5 5.0 4.5 4.0 3.5 3.0 2.5 2.0 1.5 1.0 ppm

1.00 1.01 1.00 1.01 4.25 3.16 9.48

— 206.022

— 154.833

— 147.539

— 144.206

— 135.615

— 126.841

— 126.233

— 125.530

— 109.494

— 87.333

— 77.000

— 55.674

— 38.451

— 25.607

— 24.656

— 19.450

— 15.770

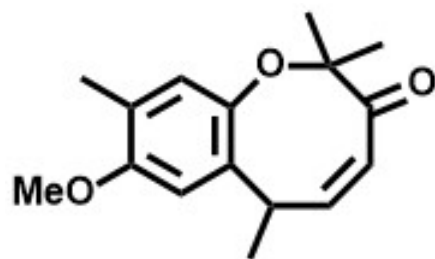

**14**

75 MHz, CDCl<sub>3</sub>

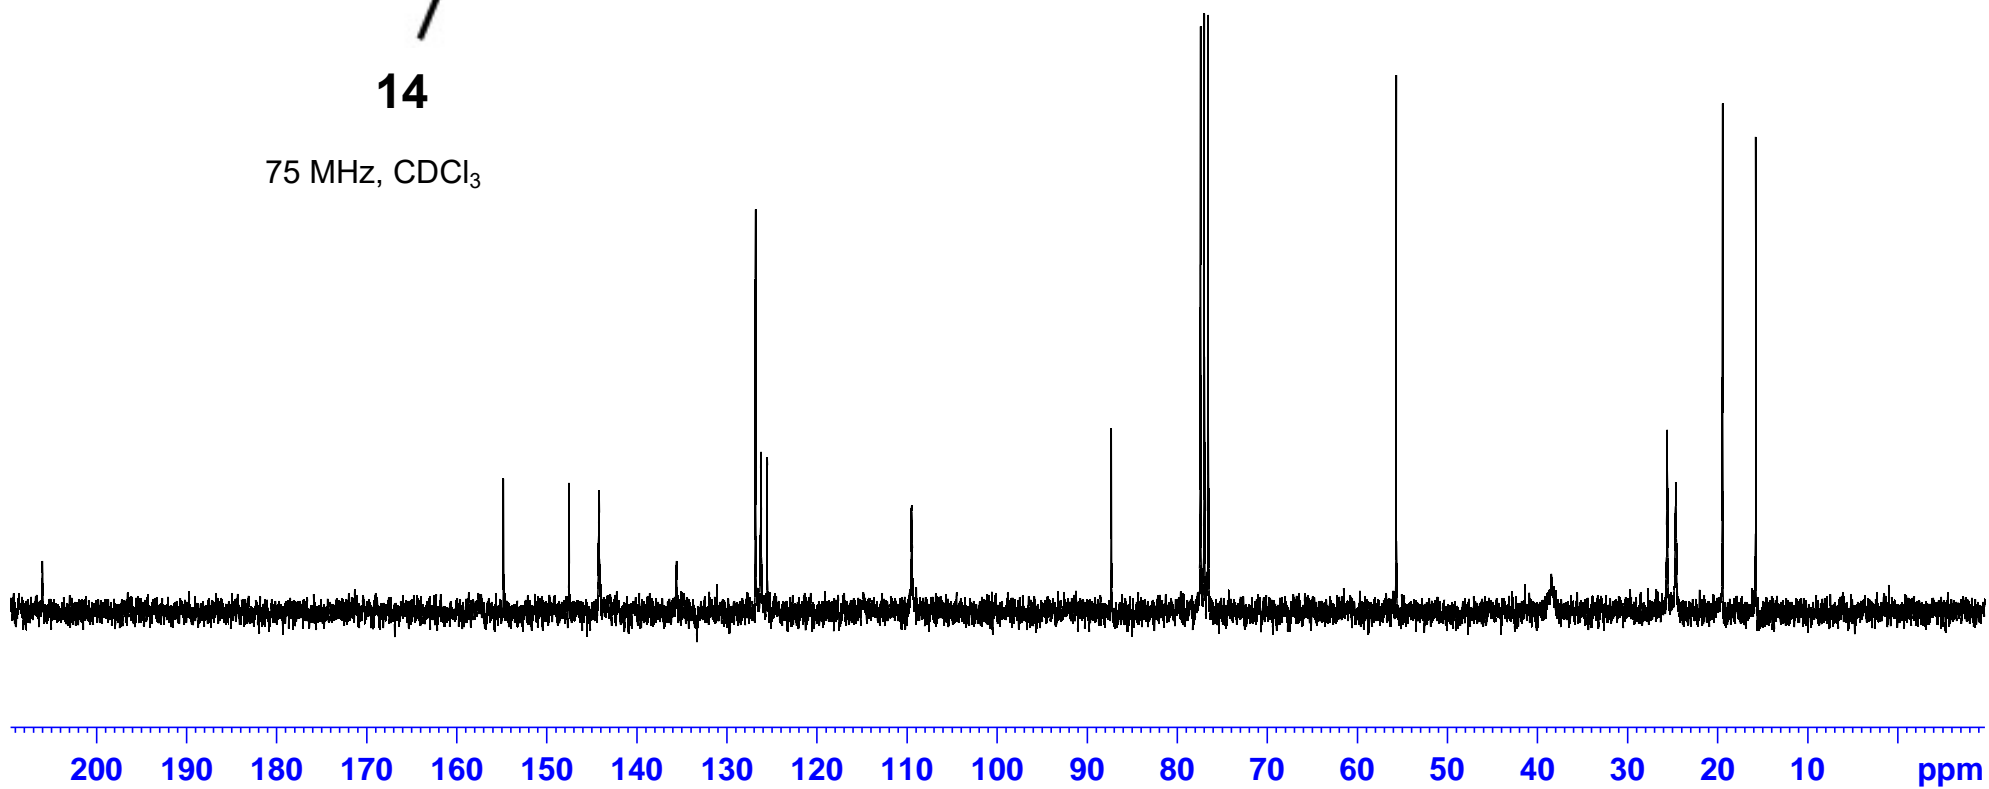

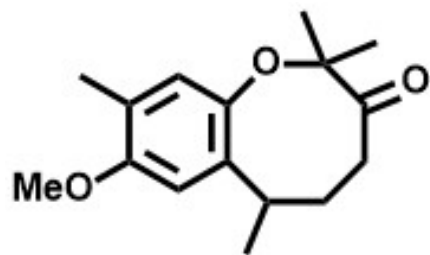

heliannuol K methyl ether, **3b**

300 MHz, CDCl<sub>3</sub>

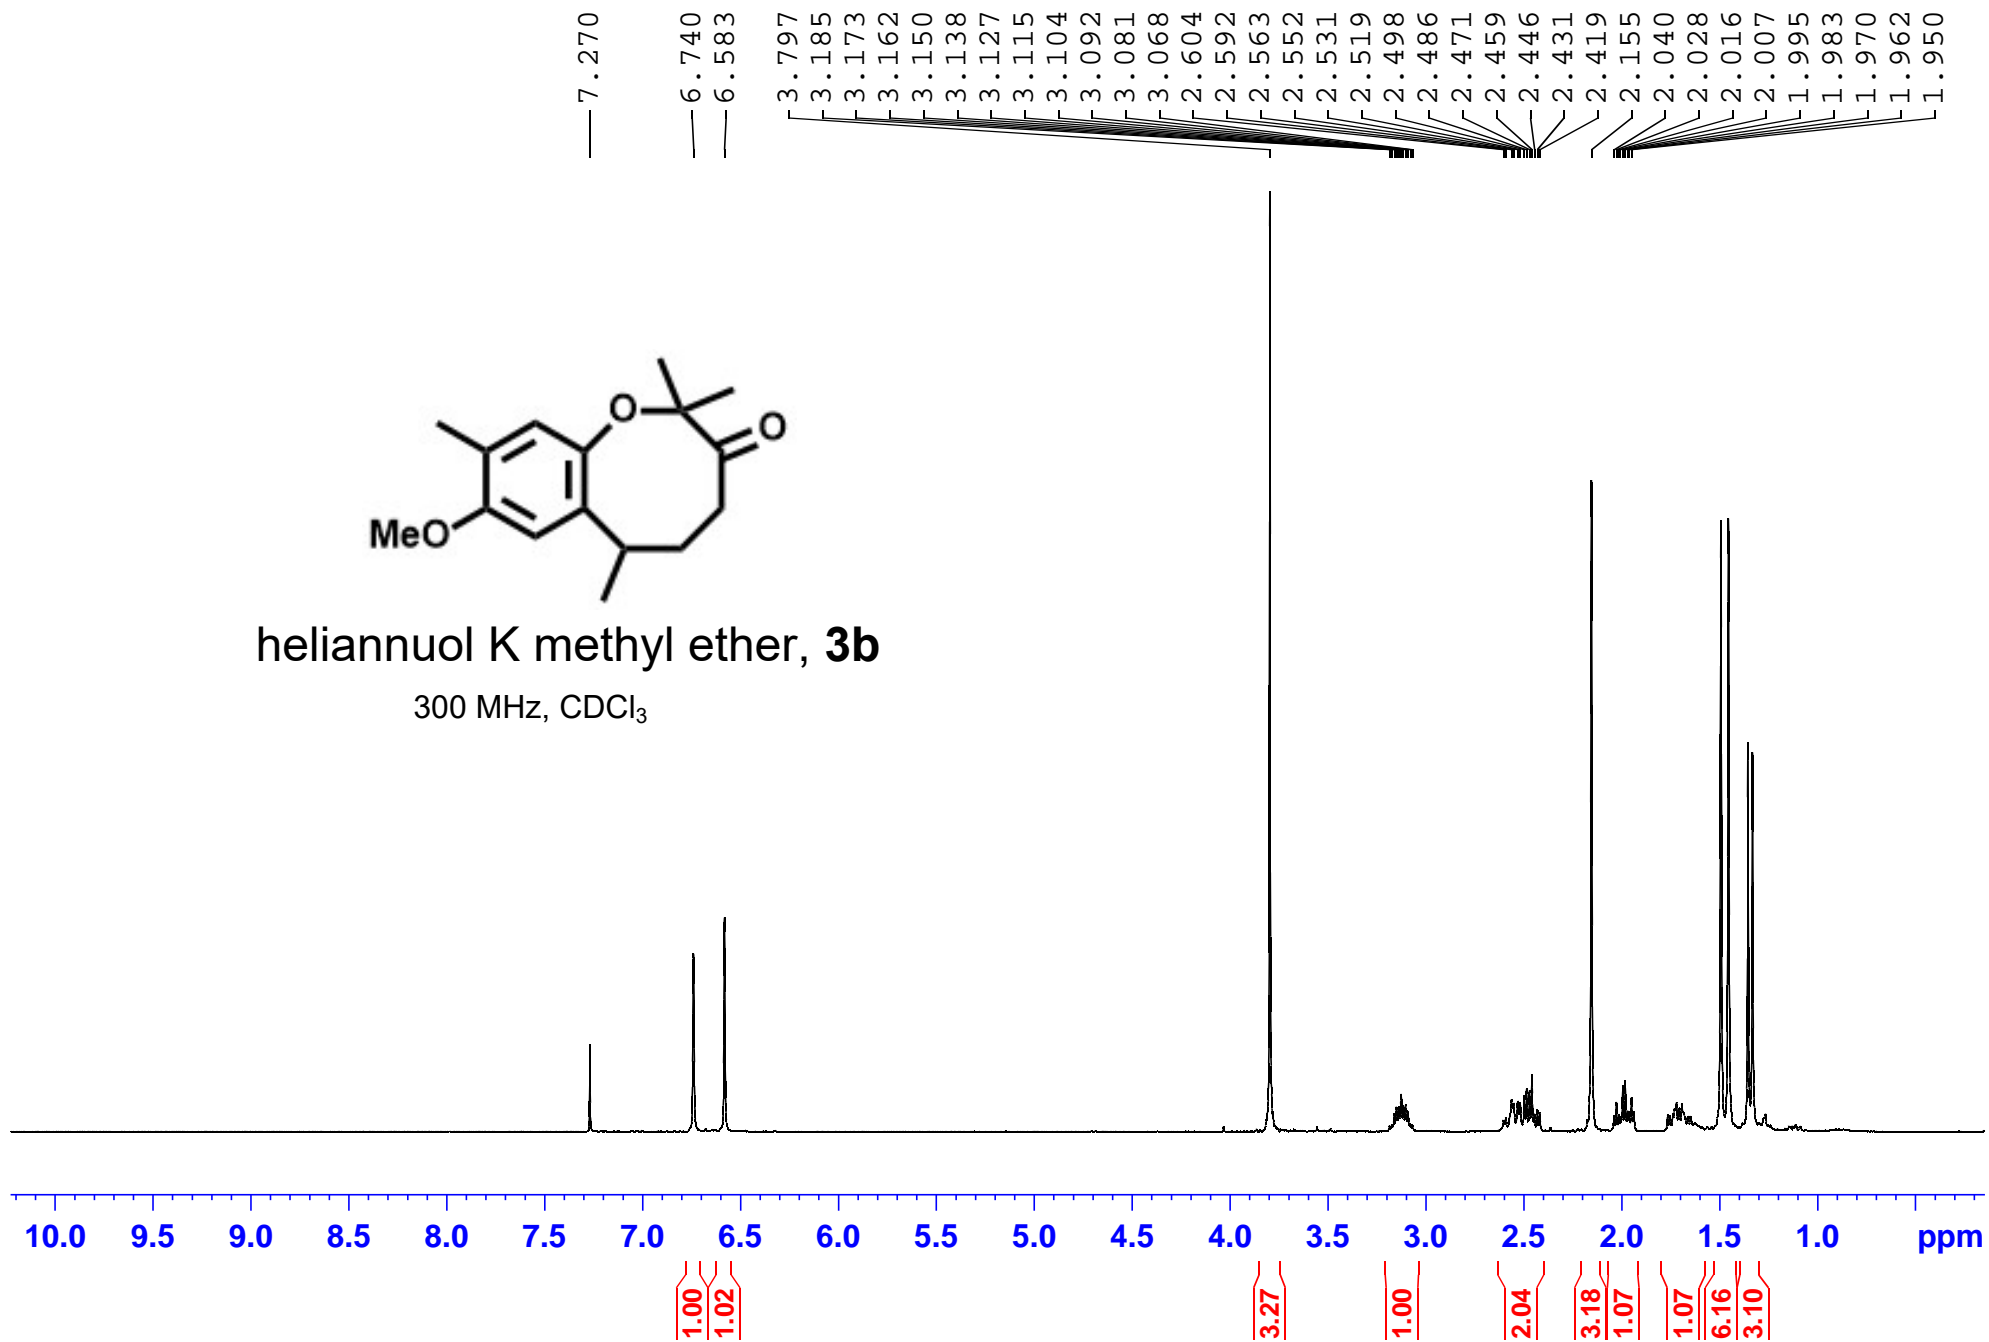

— 213.026

— 154.903

— 146.010

— 136.952

— 127.498

— 124.428

— 108.786

— 85.967

77.423

77.000

76.577

— 55.518

36.085

34.700

34.496

24.399

23.498

20.470

15.811

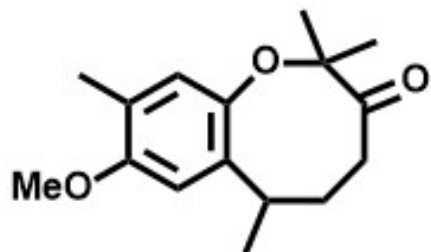

heliannuol K methyl ether, **3b**

75 MHz, CDCl<sub>3</sub>

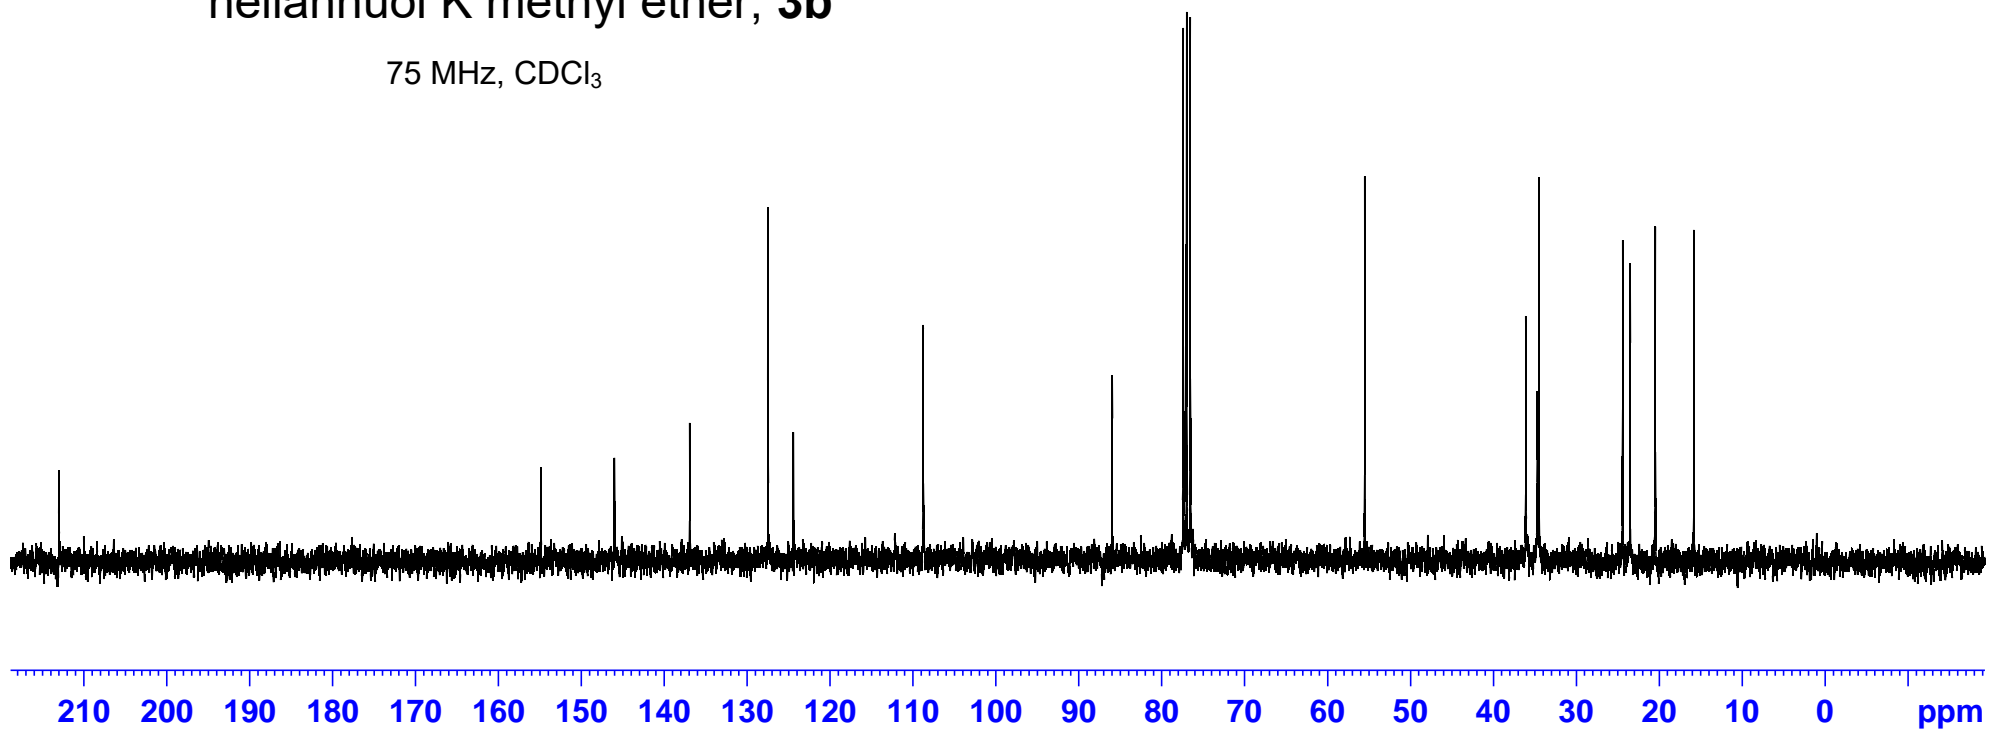

Supplement: d1ob01395e1.pdf [file d1ob01395e1.pdf]
